# Supplementary material for: A new synthetic approach to cyclic ureas through carbonylation using di-tert-butyl dicarbonate (boc anhydride) via one pot strategy
Source: Royal Society of Chemistry journal article supplement (doi:10.1039/d3ob01330h), 2023-01-01

## Spectrum:

### <sup>1</sup>H NMR of benzimidazolone

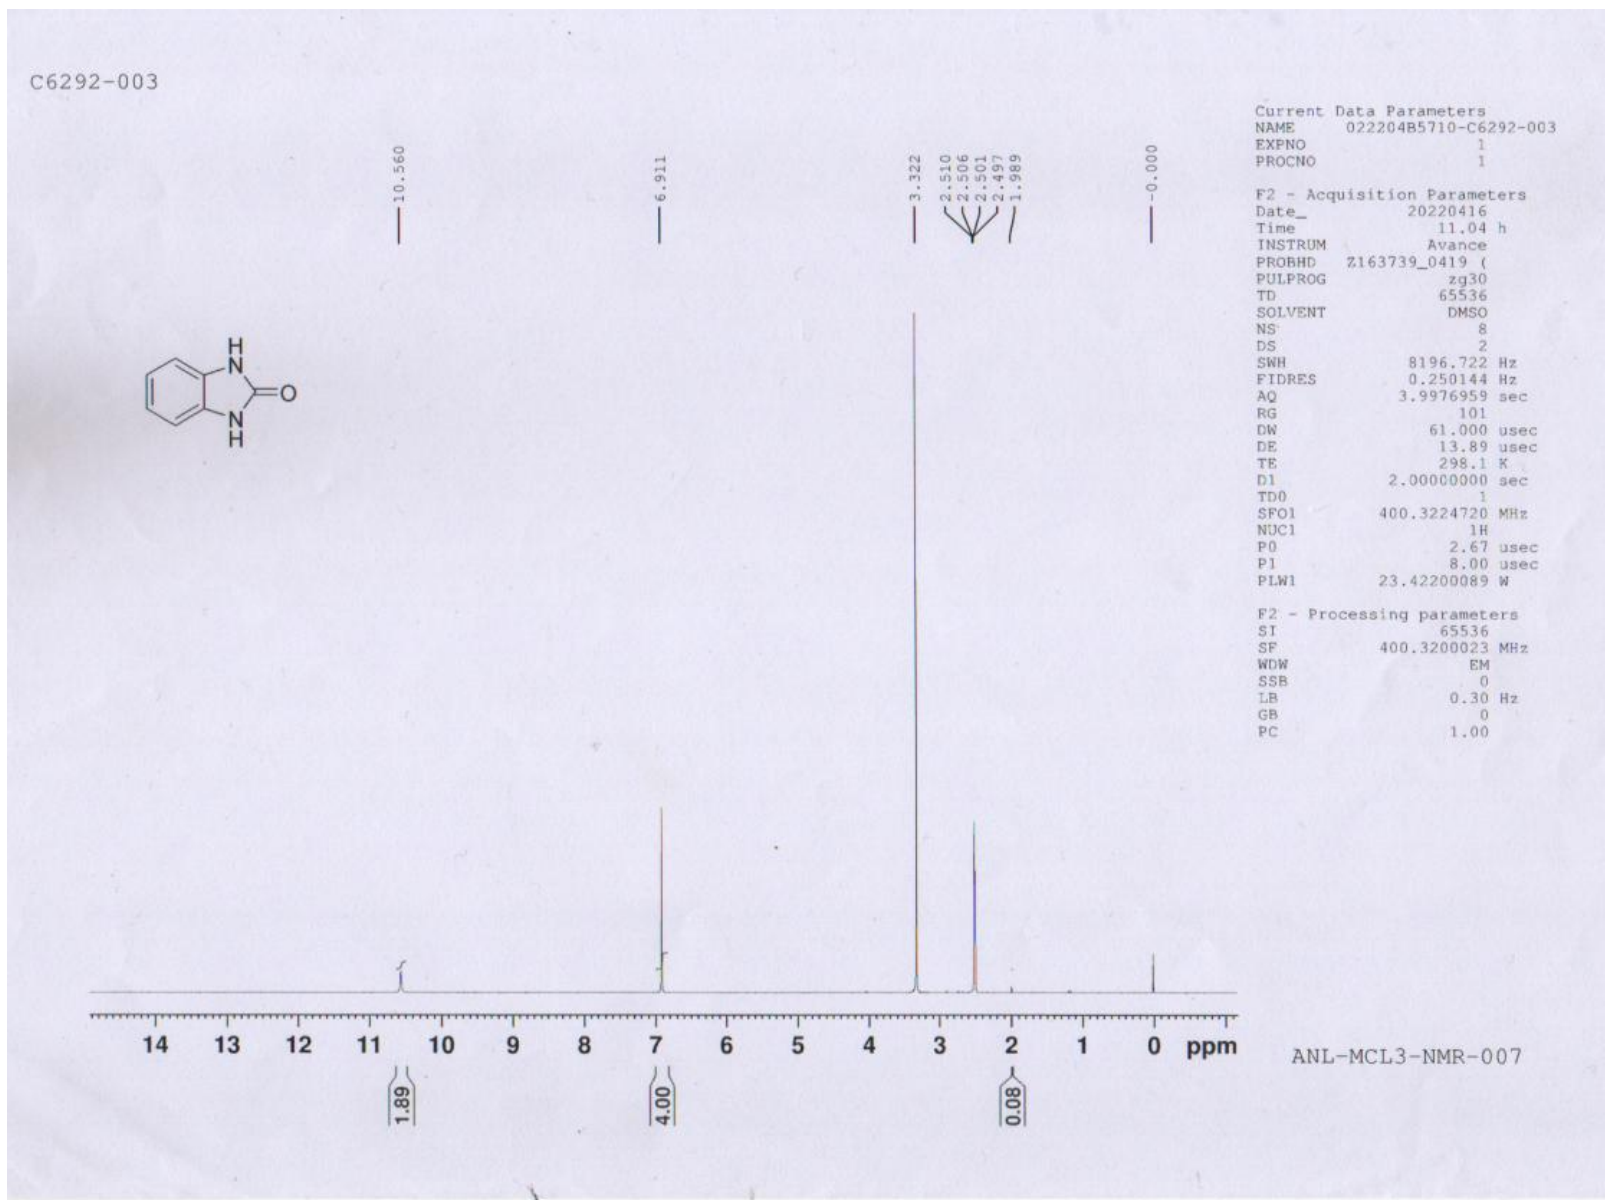

# <sup>13</sup>C NMR of benzimidazolone

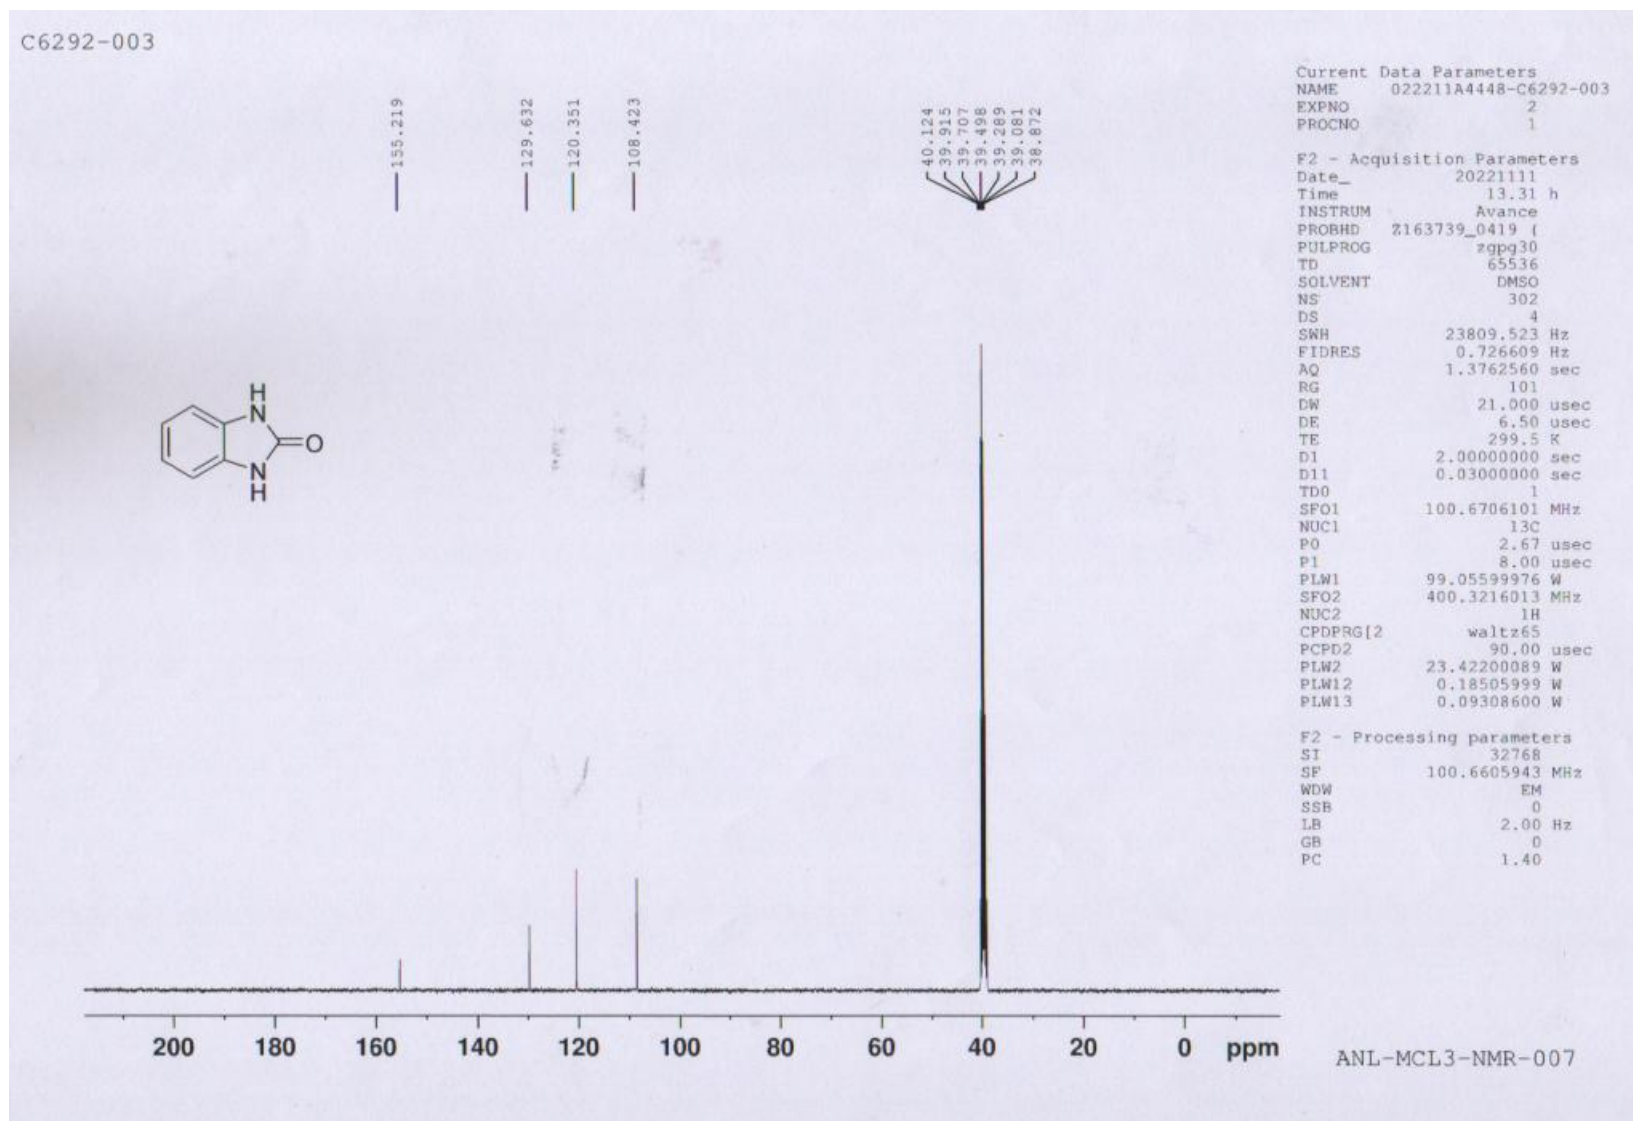

C6292-003

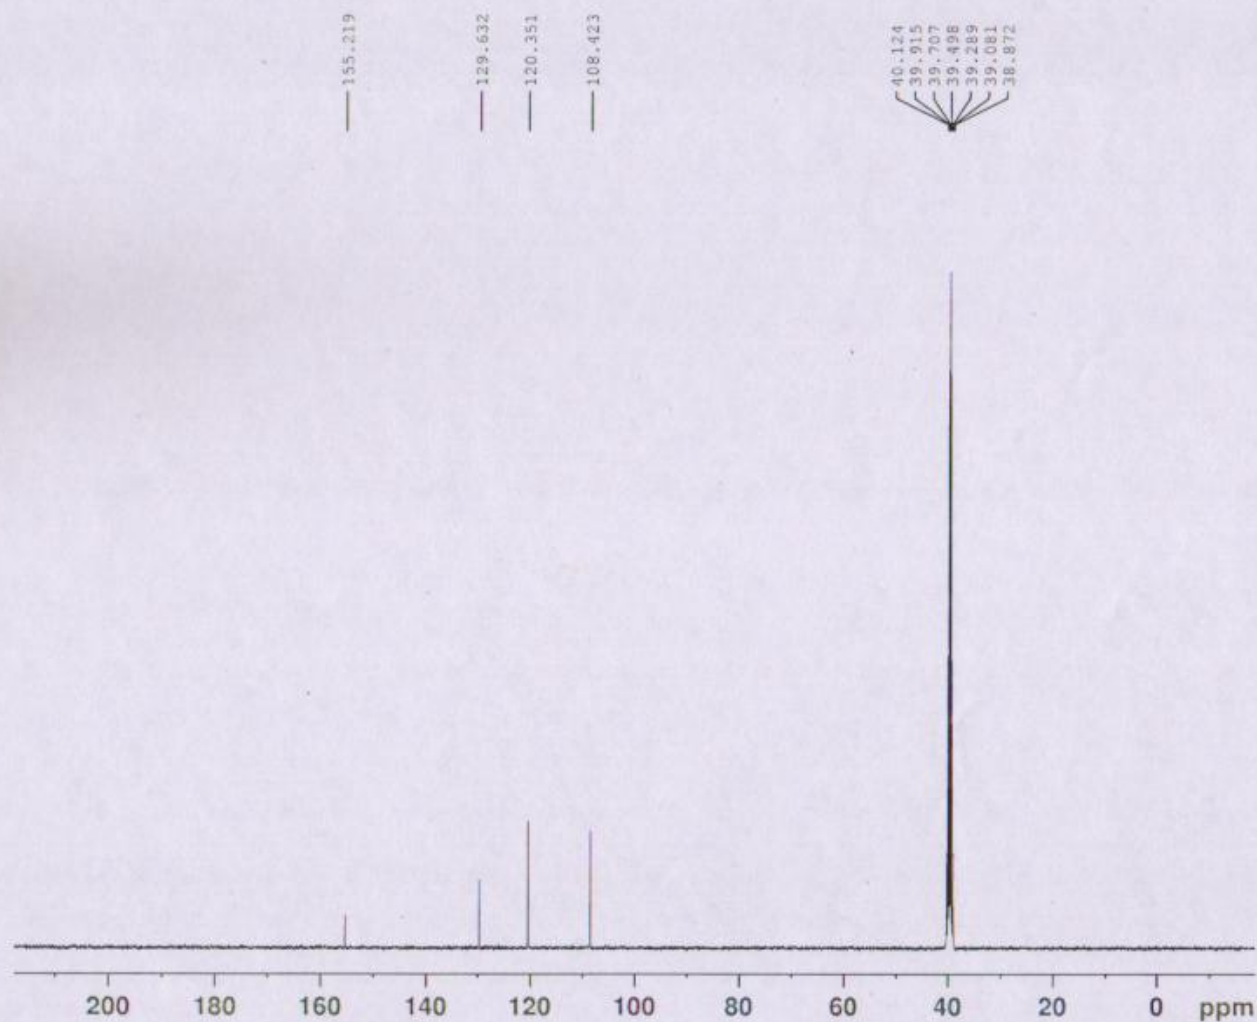

Current Data Parameters  
NAME 022211A4448-C6292-003  
EXPNO 2  
PROCNO 1

F2 - Acquisition Parameters  
Date\_ 20221111  
Time 13.31 h  
INSTRUM Avance  
PROBHD Z163739\_0419 1  
PULPROG zgpg30  
TD 65536  
SOLVENT DMSO  
NS 302  
DS 4  
SWH 23809.523 Hz  
FIDRES 0.726609 Hz  
AQ 1.3762560 sec  
RG 101  
DW 21.000 usec  
DE 6.50 usec  
TE 299.5 K  
D1 2.0000000 sec  
D11 0.0300000 sec  
TD0 1  
SFO1 100.6706101 MHz  
NUC1 13C  
P0 2.67 usec  
P1 8.00 usec  
PLW1 99.05599976 W  
SFO2 400.3216013 MHz  
NUC2 1H  
CPDPRG[2] waltz65  
PCPD2 90.00 usec  
PLW2 23.42200089 W  
PLW12 0.18505999 W  
PLW13 0.09308600 W

F2 - Processing parameters  
SI 32768  
SF 100.6605943 MHz  
WDW EM  
SSB 0  
LB 2.00 Hz  
GB 0  
PC 1.40

ANL-MCL3-NMR-007

C6292-003

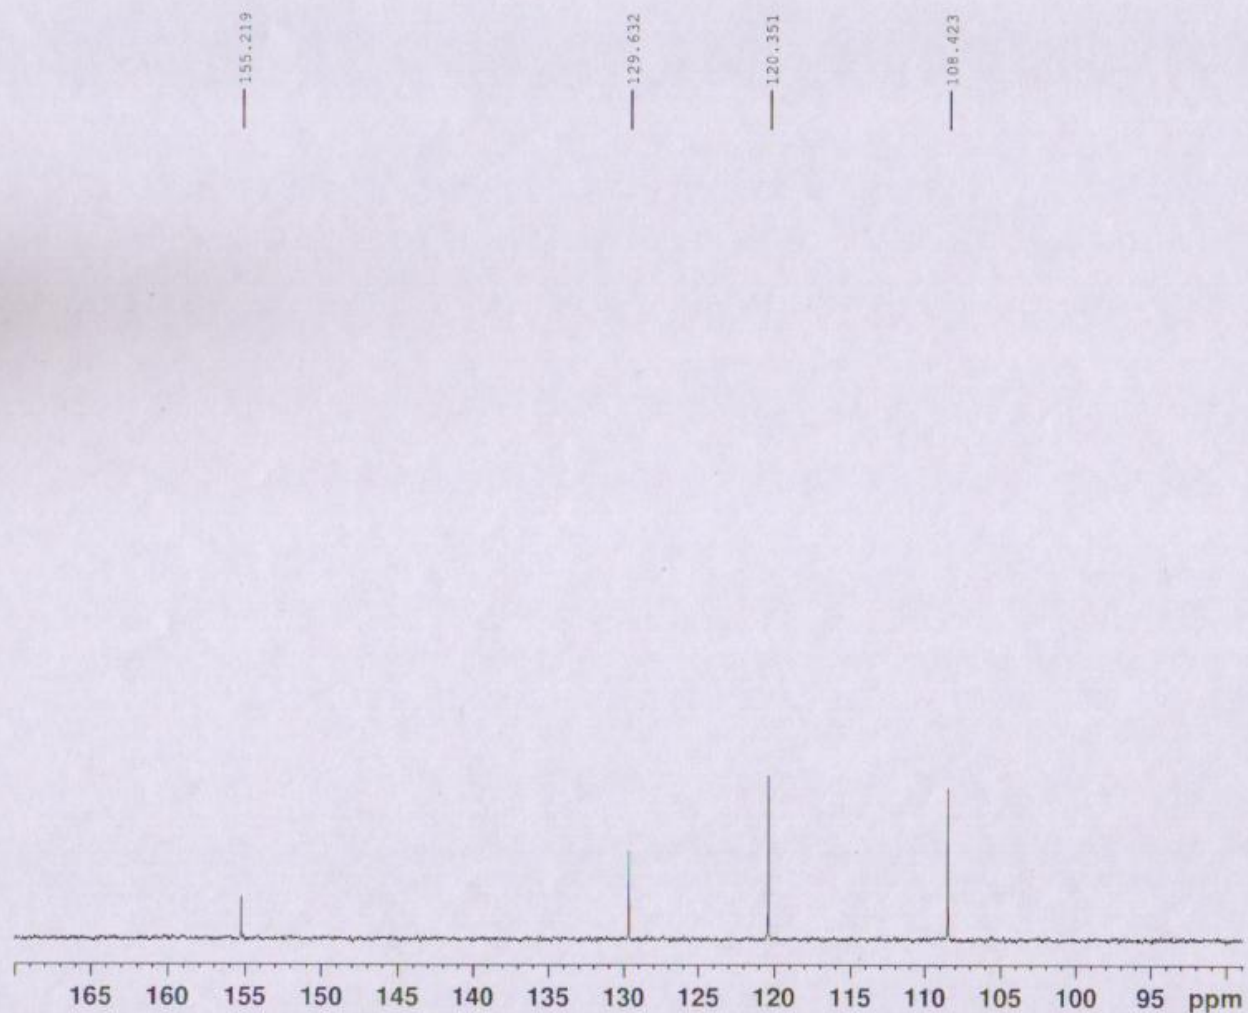

Current Data Parameters  
NAME 022211A4448-C6292-003  
EXPNO 2  
PROCNO 1

F2 - Acquisition Parameters  
Date\_ 20221111  
Time 13.31 h  
INSTRUM Avance  
PROBHD Z163739\_0419 (   
PULPROG zgpg30  
TD 65536  
SOLVENT DMSO  
NS 302  
DS 4  
SWH 23809.521 Hz  
FIDRES 0.726609 Hz  
AQ 1.3762560 sec  
RG 101  
DW 21.000 usec  
DE 6.50 usec  
TE 299.5 K  
D1 2.0000000 sec  
D11 0.0300000 sec  
TD0 1  
SFO1 100.6706101 MHz  
NUC1 13C  
P0 2.67 usec  
P1 8.00 usec  
PLW1 99.05599976 W  
SFO2 400.3216013 MHz  
NUC2 1H  
CPDPRG[2] waltz65  
PCPD2 90.00 usec  
PLW2 23.42200089 W  
PLW12 0.18505999 W  
PLW13 0.09308600 W

F2 - Processing parameters  
SI 32768  
SF 100.6605943 MHz  
WDW EM  
SSB 0  
LB 2.00 Hz  
GB 0  
PC 1.40

ANL-MCL3-NMR-007

# LCMS of benzimidazolone

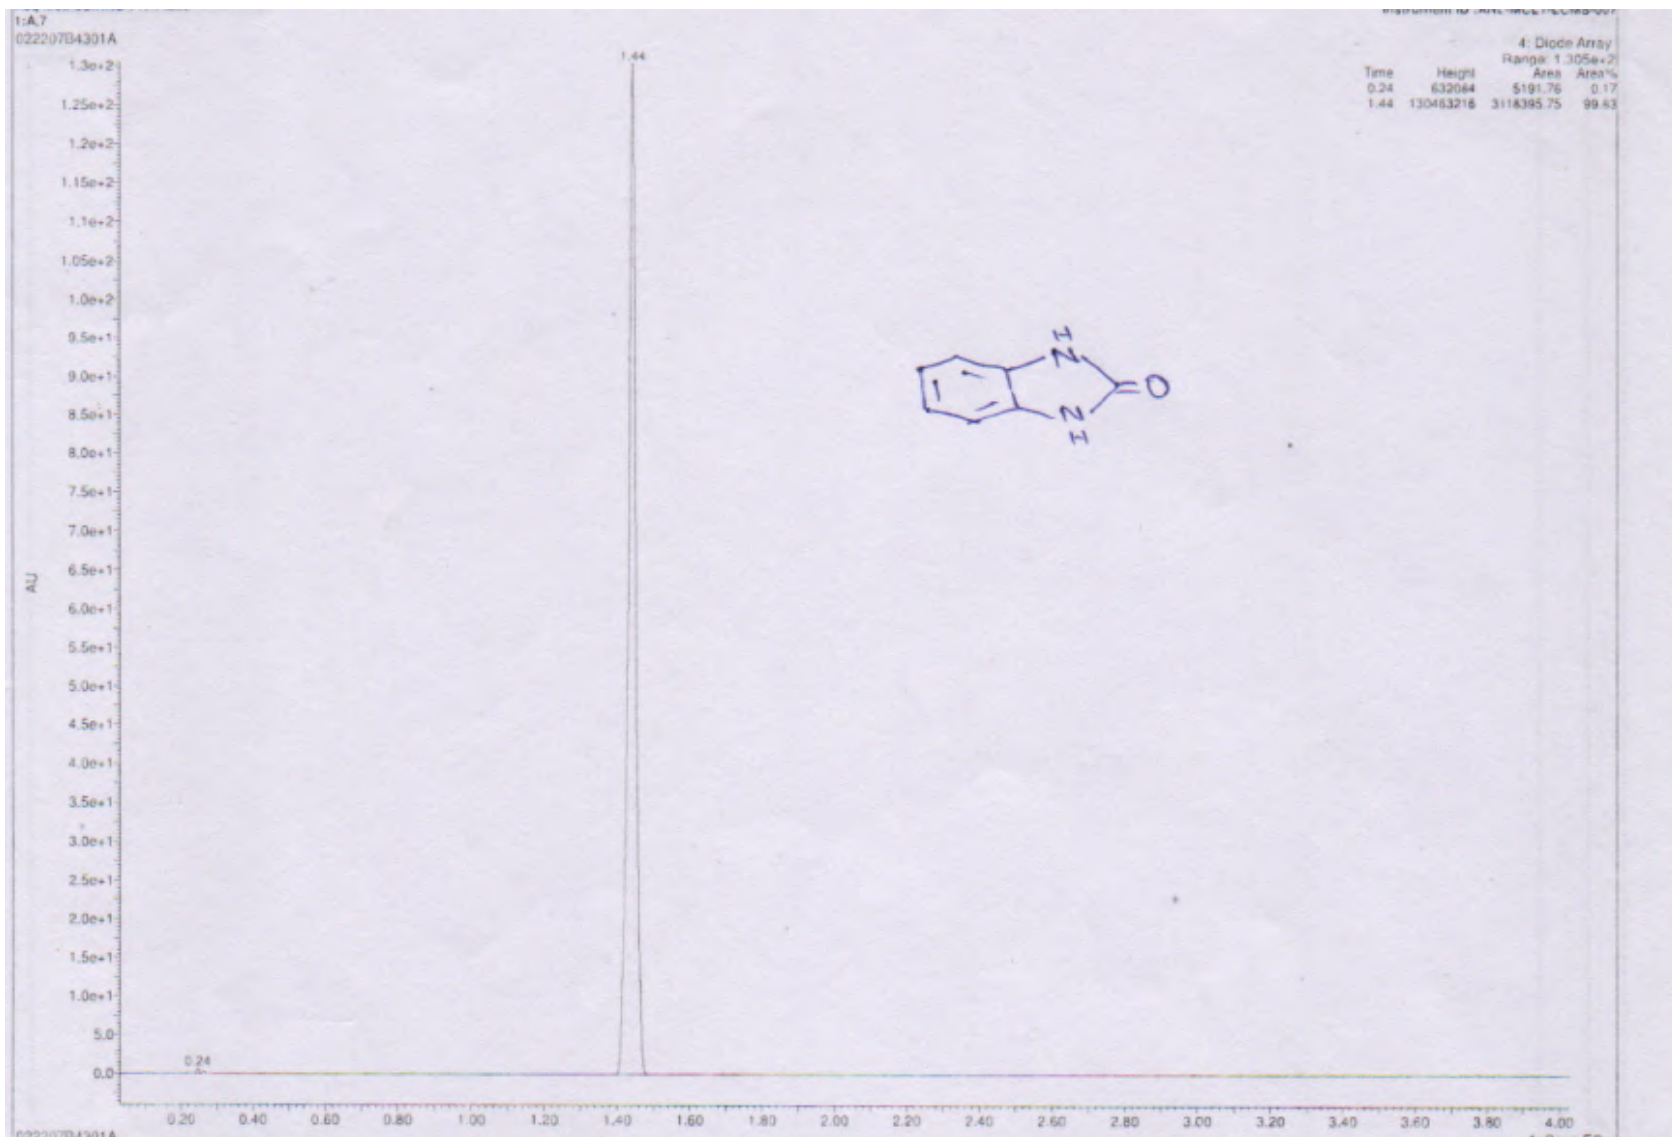

SAMPLE ID: C6390-003  
Acq Method: FID-F-A4.MN  
C2220704301A.S7 (1.457)

100 125.11

Date of Analysis: 15-Jul-2022 10:21:48  
Instrument ID: ANI-HCL1-LCMS-007  
1: Scan EC:  
3.8826

100 125.11

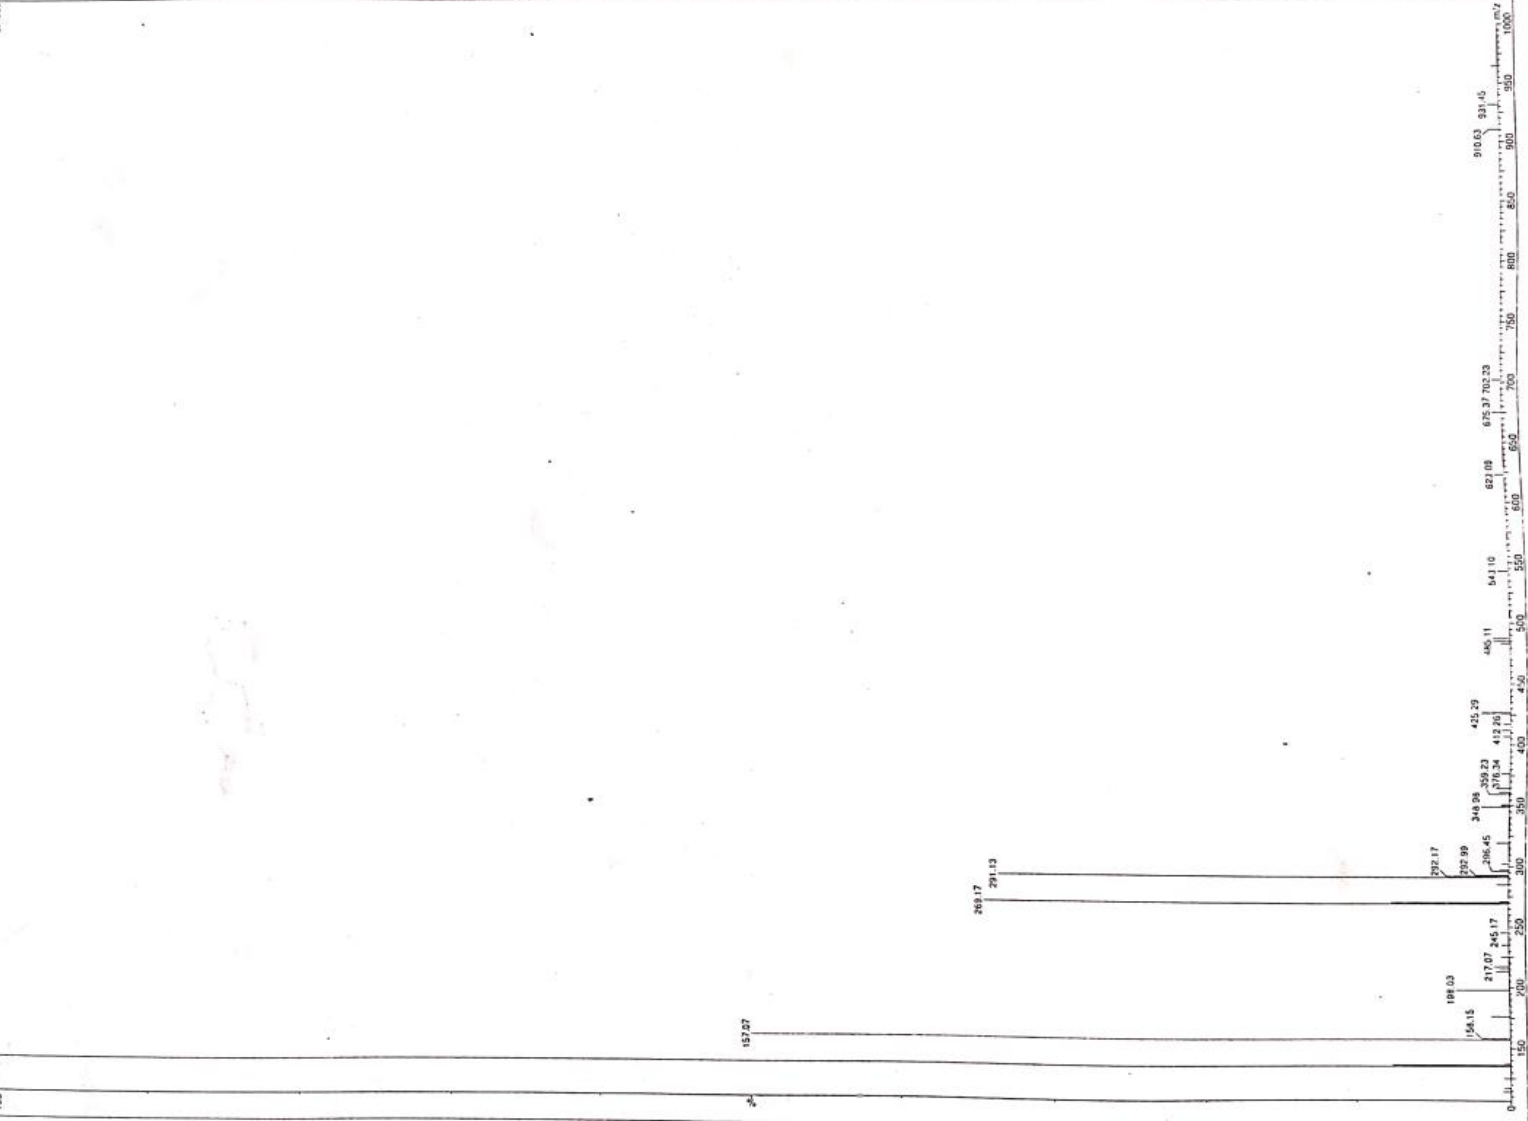

# <sup>1</sup>H NMR of 5-Fluoro-1,3-dihydro-2H-benzo[d]imidazol-2-one (2a)

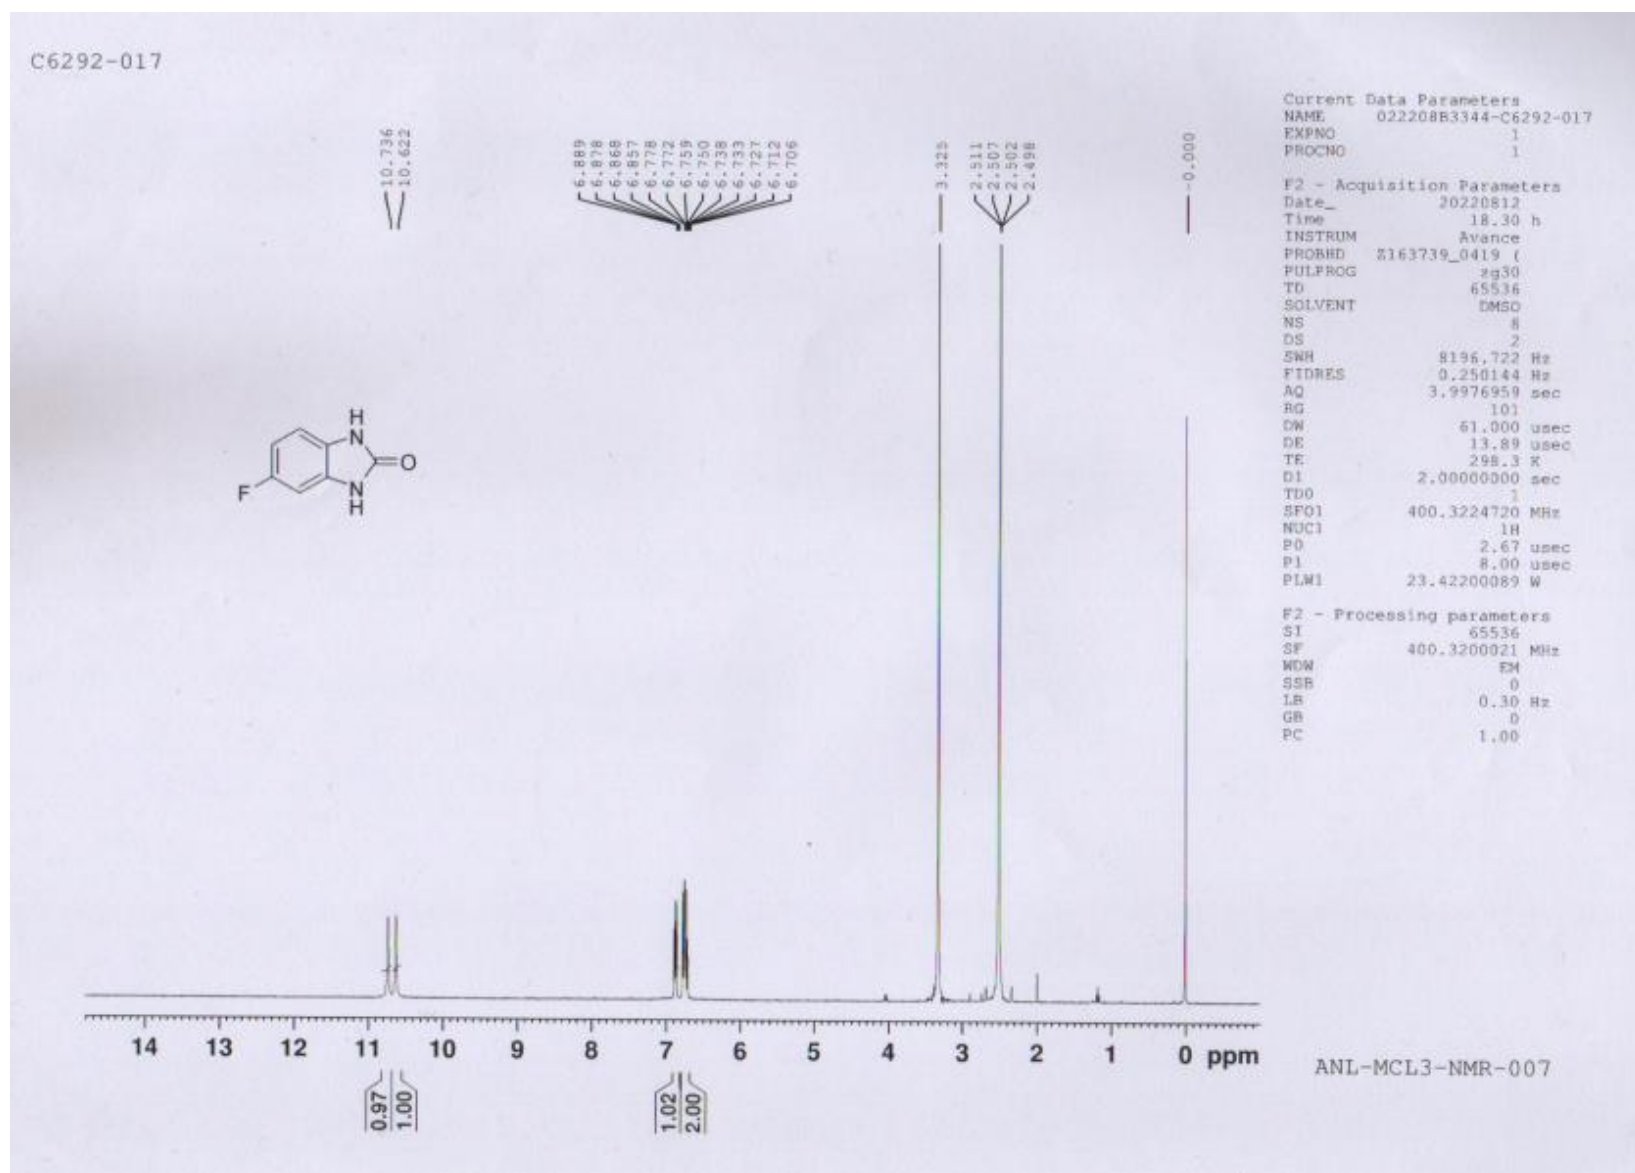

C6292-017

10.736  
10.622

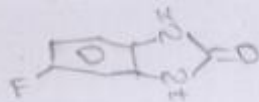

6.889  
6.878  
6.868  
6.857  
6.778  
6.772  
6.759  
6.750  
6.738  
6.732  
6.727  
6.712  
6.706

Current Data Parameters  
NAME 022208B1344-C6292-017  
EXPNO 1  
PROCNO 1

F2 - Acquisition Parameters  
Date\_ 20220812  
Time 18.30 h  
INSTRUM Avance  
PROBHD Z163739\_0419 f  
PULPROG zg30  
TD 65536  
SOLVENT DMSO  
NS 8  
DS 2  
SWH 8196.722 Hz  
FIDRES 0.250144 Hz  
AQ 3.9976559 sec  
RG 101  
DW 61.000 usec  
DE 13.89 usec  
TE 298.3 K  
D1 2.00000000 sec  
TDO 1  
SFO1 400.3224720 MHz  
NUC1 1H  
P0 2.67 usec  
P1 8.00 usec  
PLW1 23.42200089 W

F2 - Processing parameters  
SI 65536  
SF 400.3200071 MHz  
WDW EM  
SSB 0  
LB 0.30 Hz  
GB 0  
PC 1.00

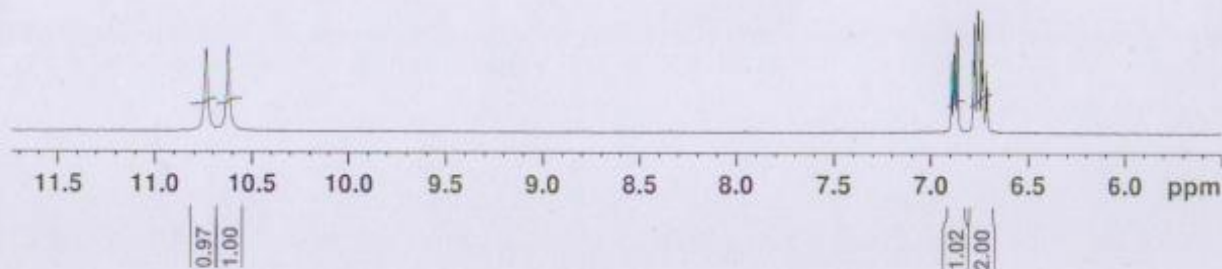

ANL-MCL3-NMR-007



# <sup>13</sup>C NMR of 5-Fluoro-1,3-dihydro-2H-benzo[d]imidazol-2-one (2a)

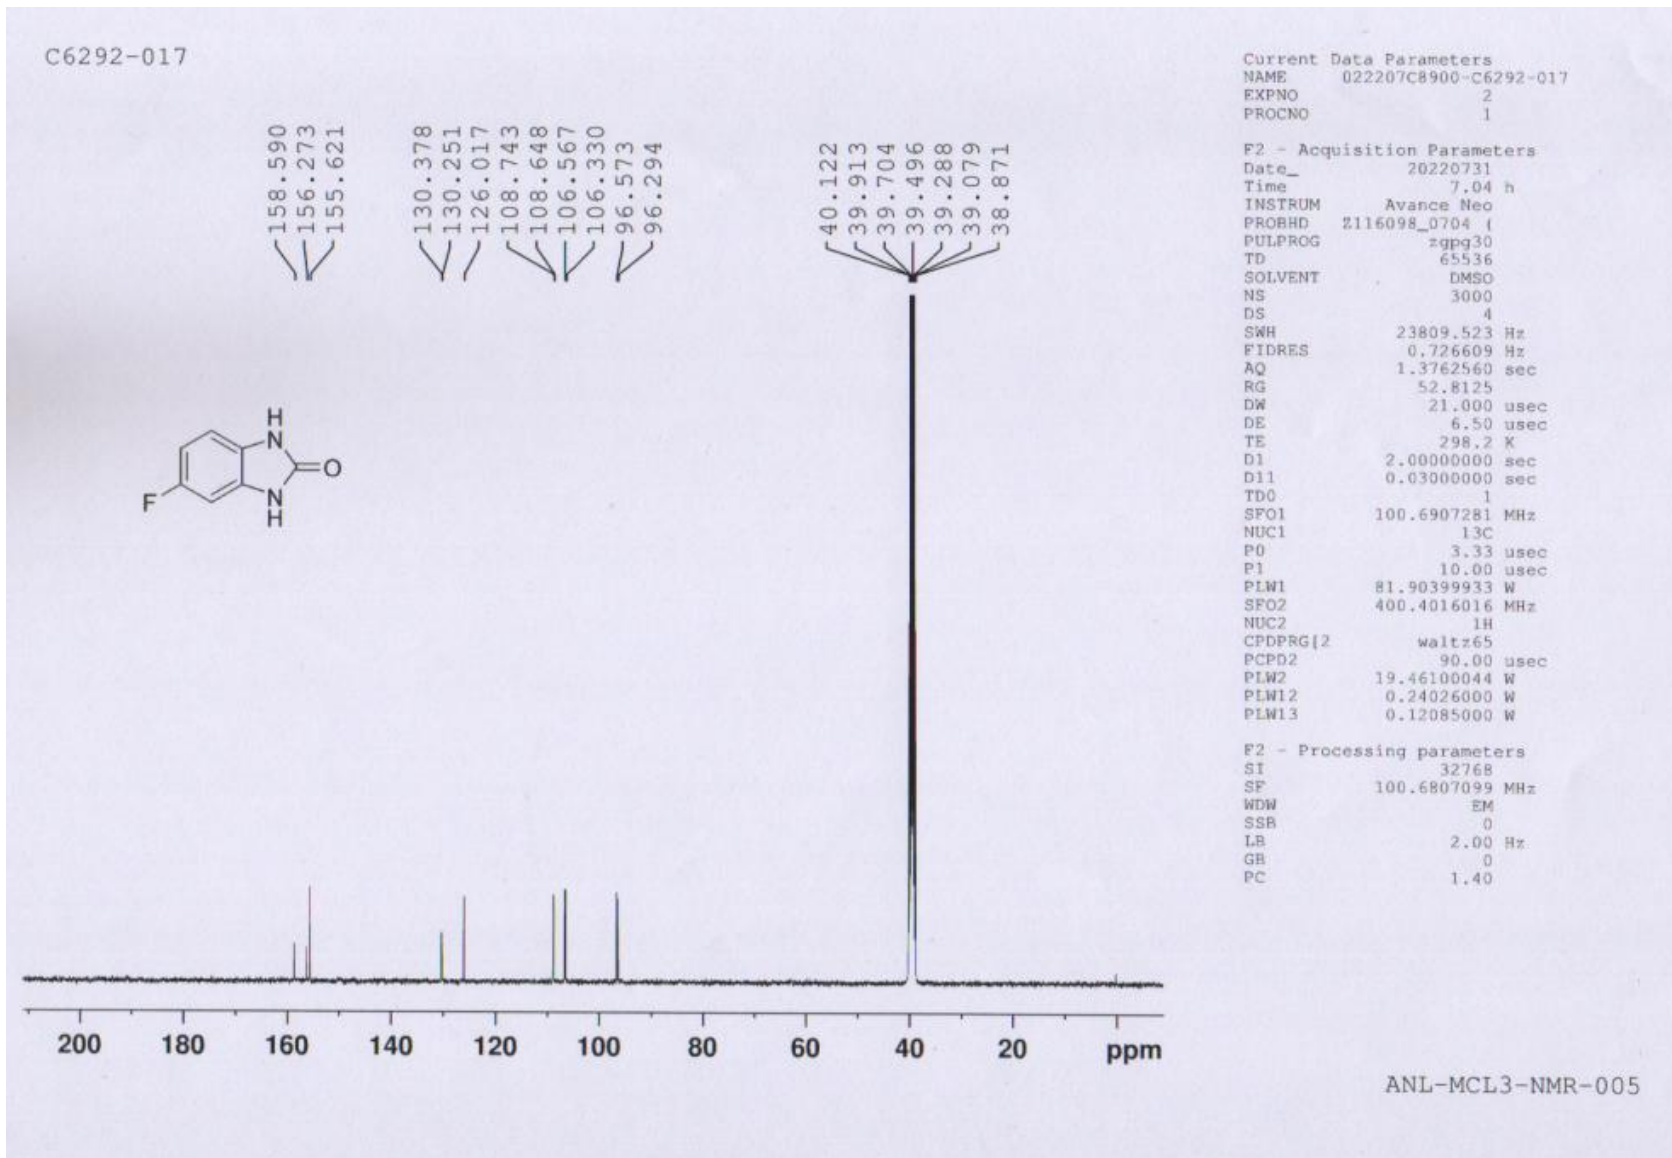

C6292-017

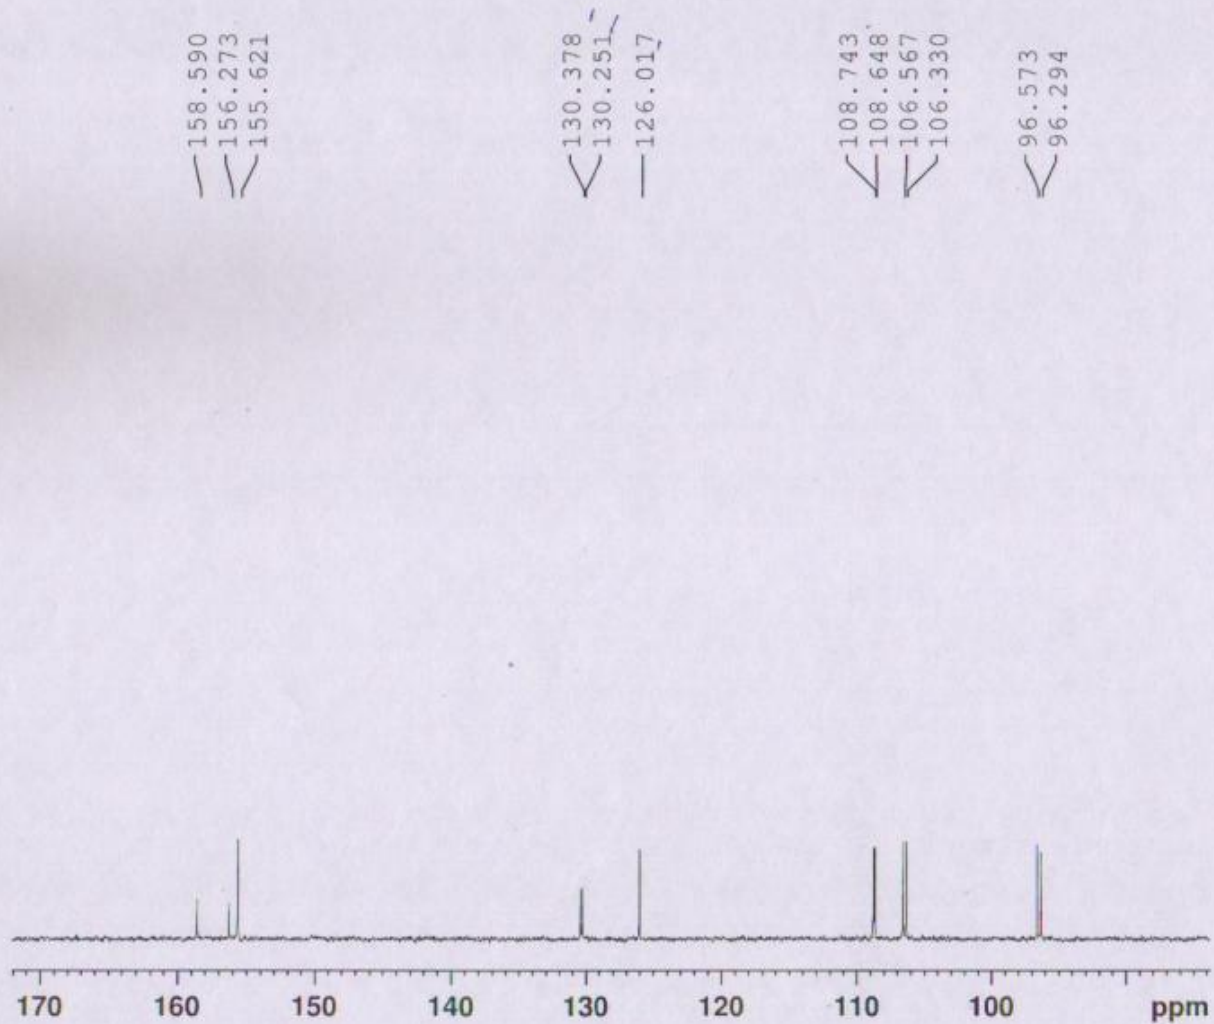

Current Data Parameters  
NAME 022207C8900-C6292-017  
EXPNO 2  
PROCNO 1

F2 - Acquisition Parameters  
Date\_ 20220731  
Time 7.04 h  
INSTRUM Avance Neo  
PROBHD Z116098\_0704 (   
PULPROG zgpg30  
TD 65536  
SOLVENT DMSO  
NS 3000  
DS 4  
SWH 23809.523 Hz  
FIDRES 0.726609 Hz  
AQ 1.3762560 sec  
RG 52.8125  
DN 21.000 usec  
DE 6.50 usec  
TE 298.2 K  
D1 2.00000000 sec  
D11 0.03000000 sec  
TDO 1  
SFO1 100.6907281 MHz  
NUC1 13C  
P0 3.33 usec  
P1 10.00 usec  
PLW1 81.90399933 W  
SFO2 400.4016016 MHz  
NUC2 1H  
CPDPRG[2] waltz65  
PCPD2 90.00 usec  
PLW2 19.46100044 W  
PLW12 0.24026000 W  
PLW13 0.12085000 W

F2 - Processing parameters  
SI 32768  
SF 100.6807099 MHz  
WDW EM  
SSB 0  
LB 2.00 Hz  
GB 0  
PC 1.40

ANL-MCL3-NMR-005

# LCMS of 5-Fluoro-1,3-dihydro-2H-benzo[d]imidazol-2-one (2a)

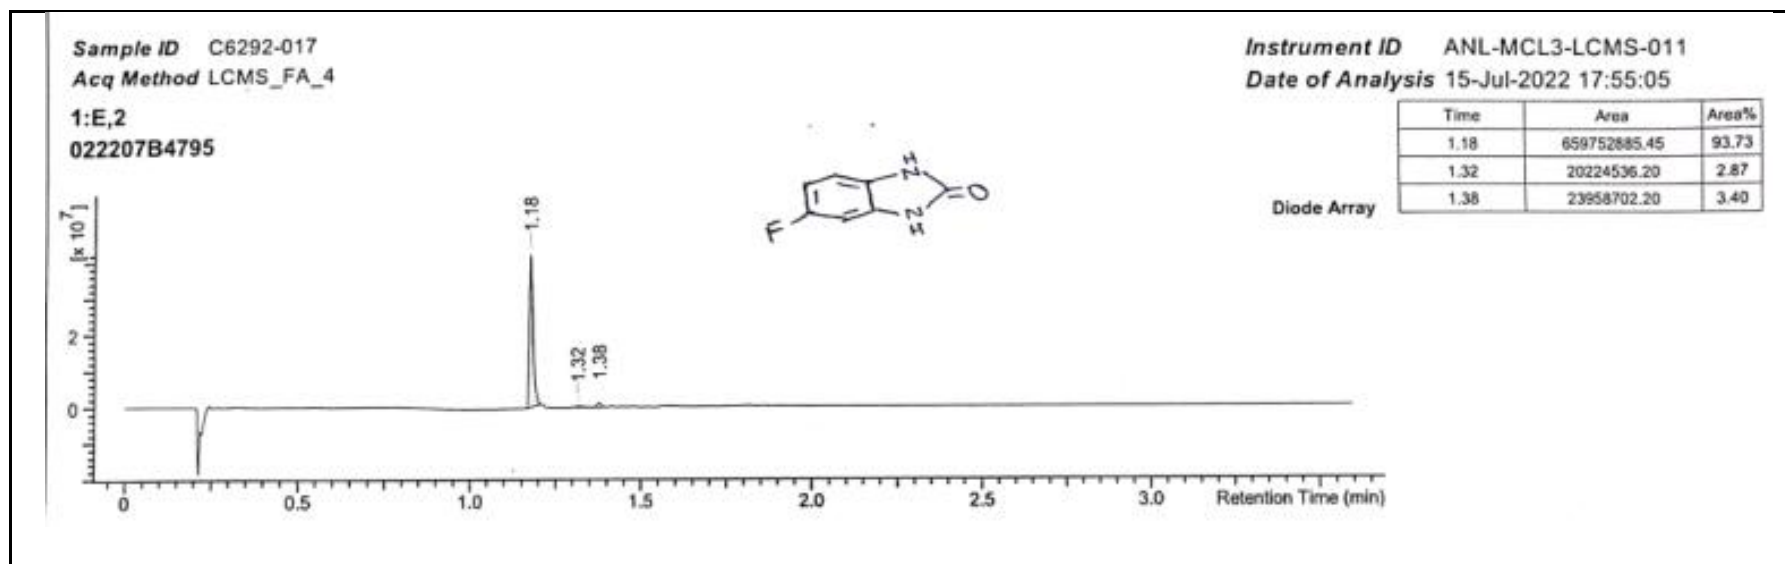

Sample ID C6292-017

Discovery Chemistry – Analytical Services

Instrument ID ANL-MCL3-LCMS-011

Acq Method LCMS\_FA\_4

Date of Analysis 15-Jul-2022 17:55:05

1:E,2

022207B4795

Retention Time: 1.226  
Ion Mode: ES+

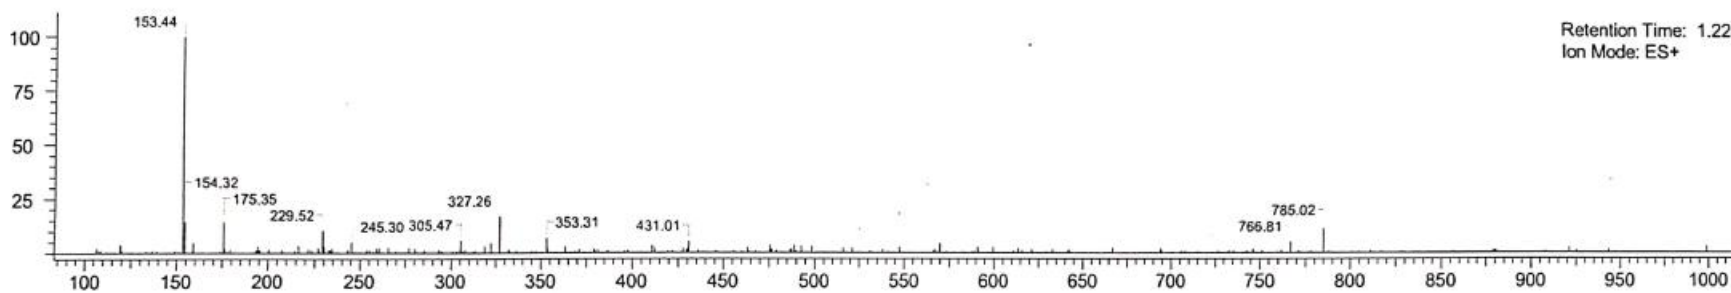

# <sup>1</sup>H NMR of 5-Chloro-1,3-dihydro-2H-benzo[d]imidazol-2-one (2b)

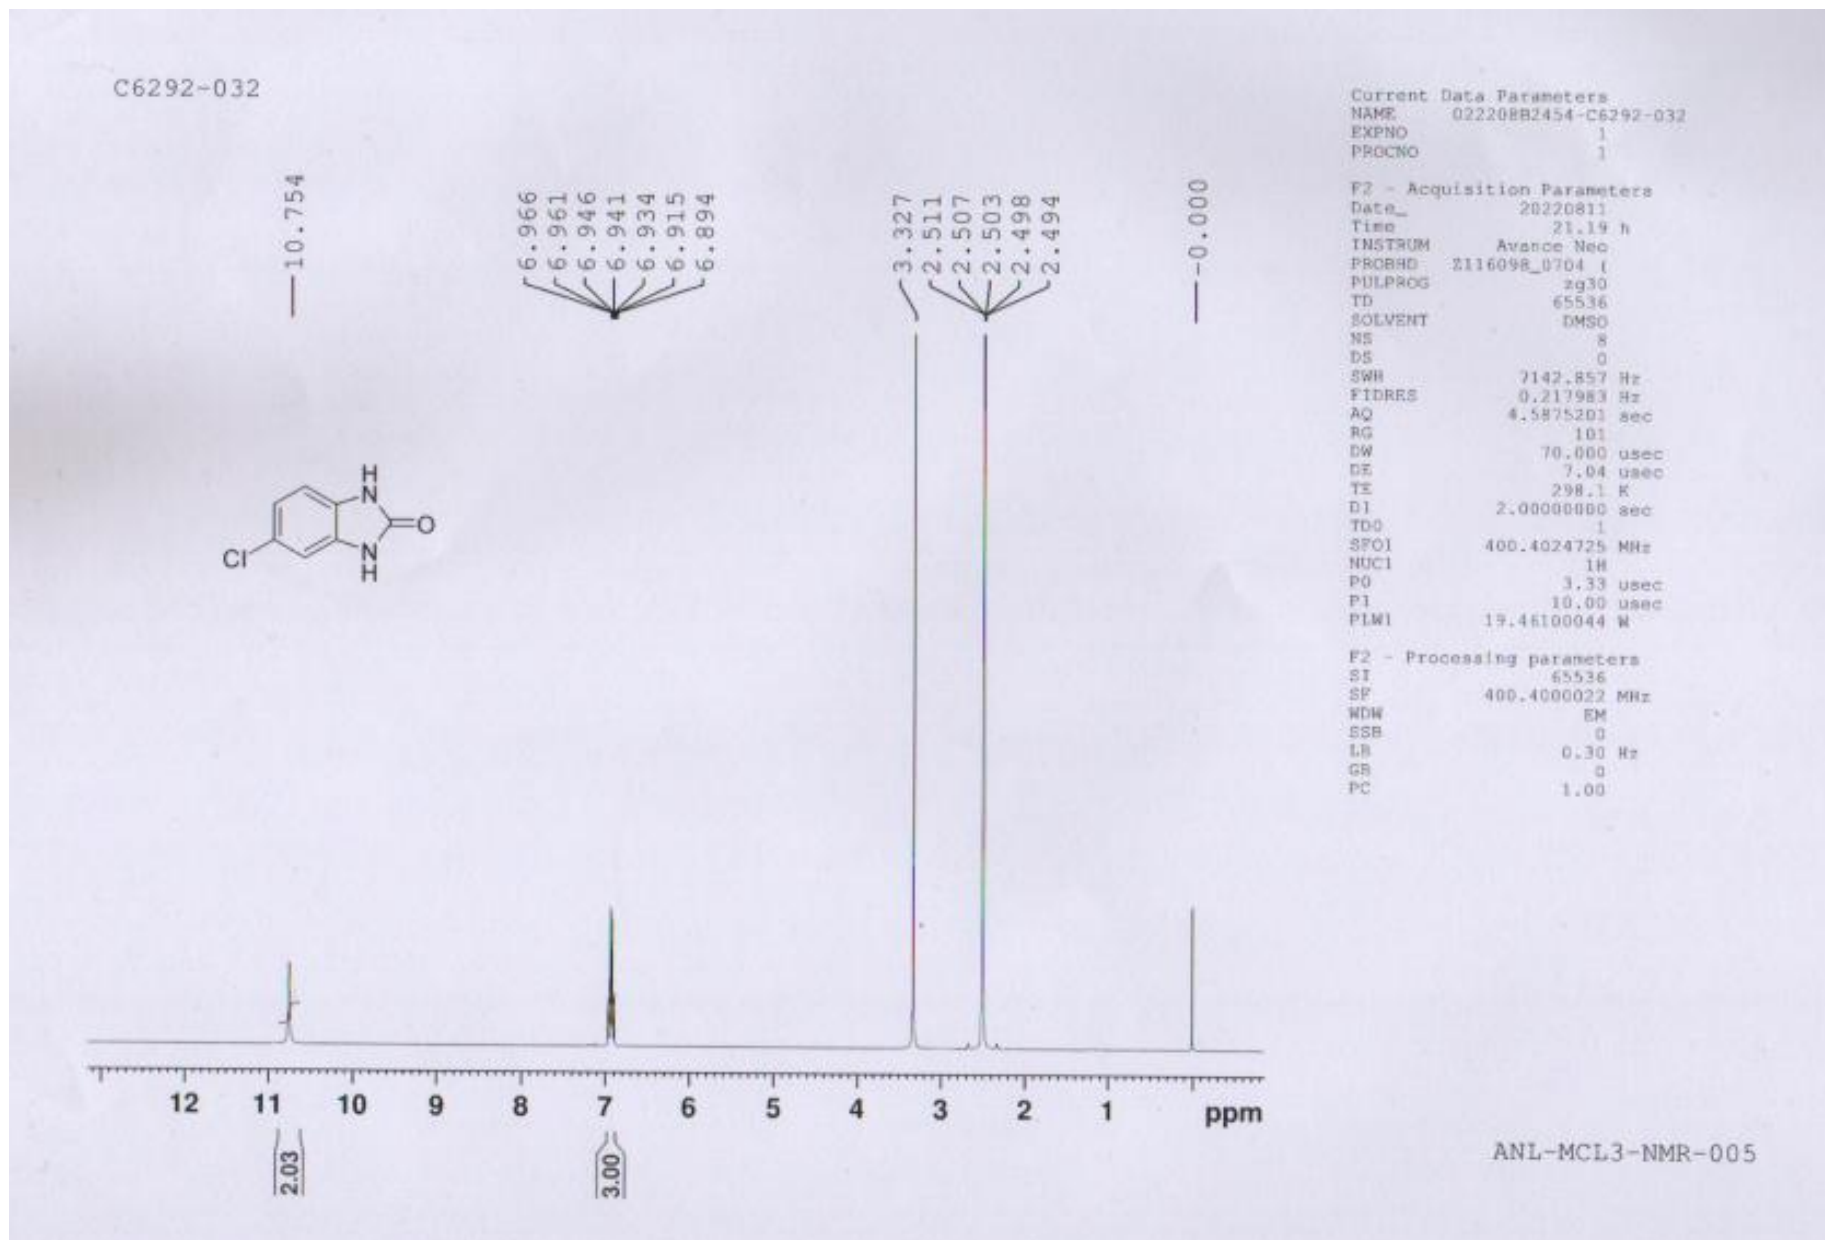

C6292-032

6.966  
6.961  
6.946  
6.941  
6.934  
6.915  
6.894

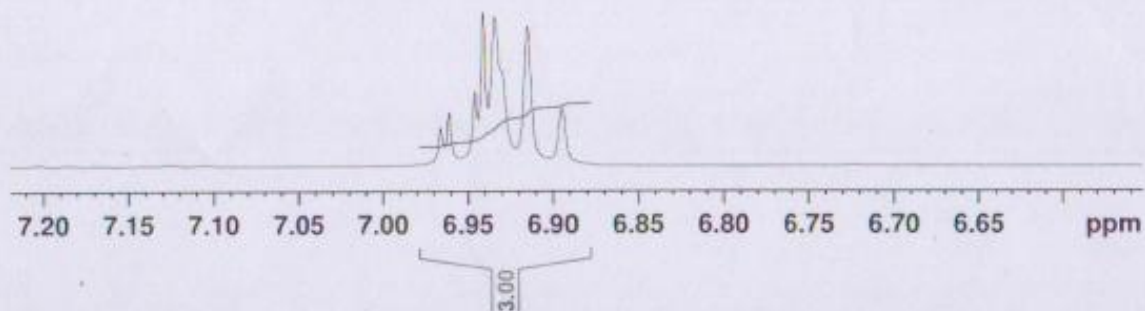

Current Data Parameters  
NAME 02220862454-C6292-032  
EXPNO 1  
PROCNO 1

F2 - Acquisition Parameters  
Date\_ 20220811  
Time 21.19 h  
INSTRUM Avance Neo  
PROBHD E116098\_0704 (   
PULPROG zg30  
TD 65536  
SOLVENT DMSO  
NS 8  
DS 0  
SWH 7142.857 Hz  
FIDRES 0.217983 Hz  
AQ 4.5875201 sec  
RG 101  
EW 70.000 usec  
DE 7.04 usec  
TE 298.1 K  
D1 2.00000000 sec  
TDO 1  
SFO1 400.4024725 MHz  
NUC1 1H  
P0 3.33 usec  
P1 10.00 usec  
PL1 19.46100044 W

F2 - Processing parameters  
SI 65536  
SF 400.4000022 MHz  
WDW EM  
SSB 0  
LB 0.30 Hz  
GB 0  
PC 1.00

ANL-MCL3-NMR-005

# 13C NMR of 5-Chloro-1,3-dihydro-2H-benzo[d]imidazol-2-one (2b)

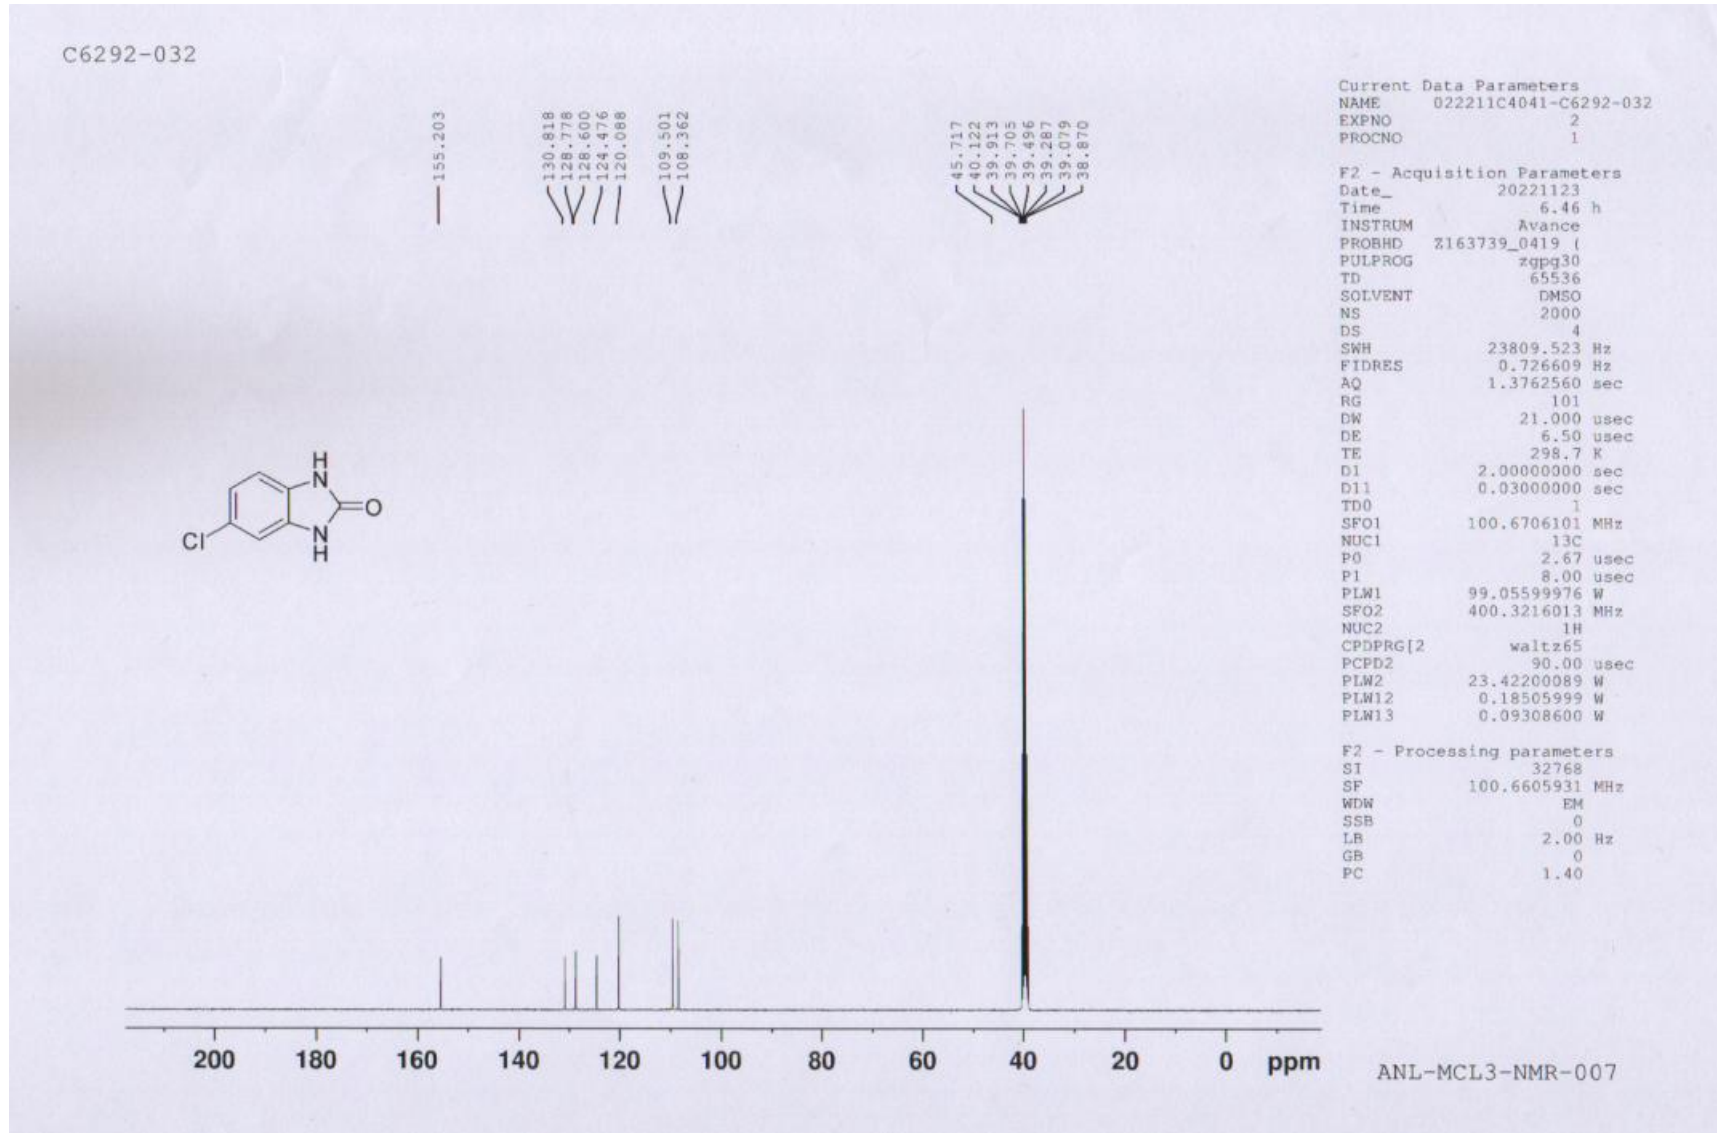

C6292-032

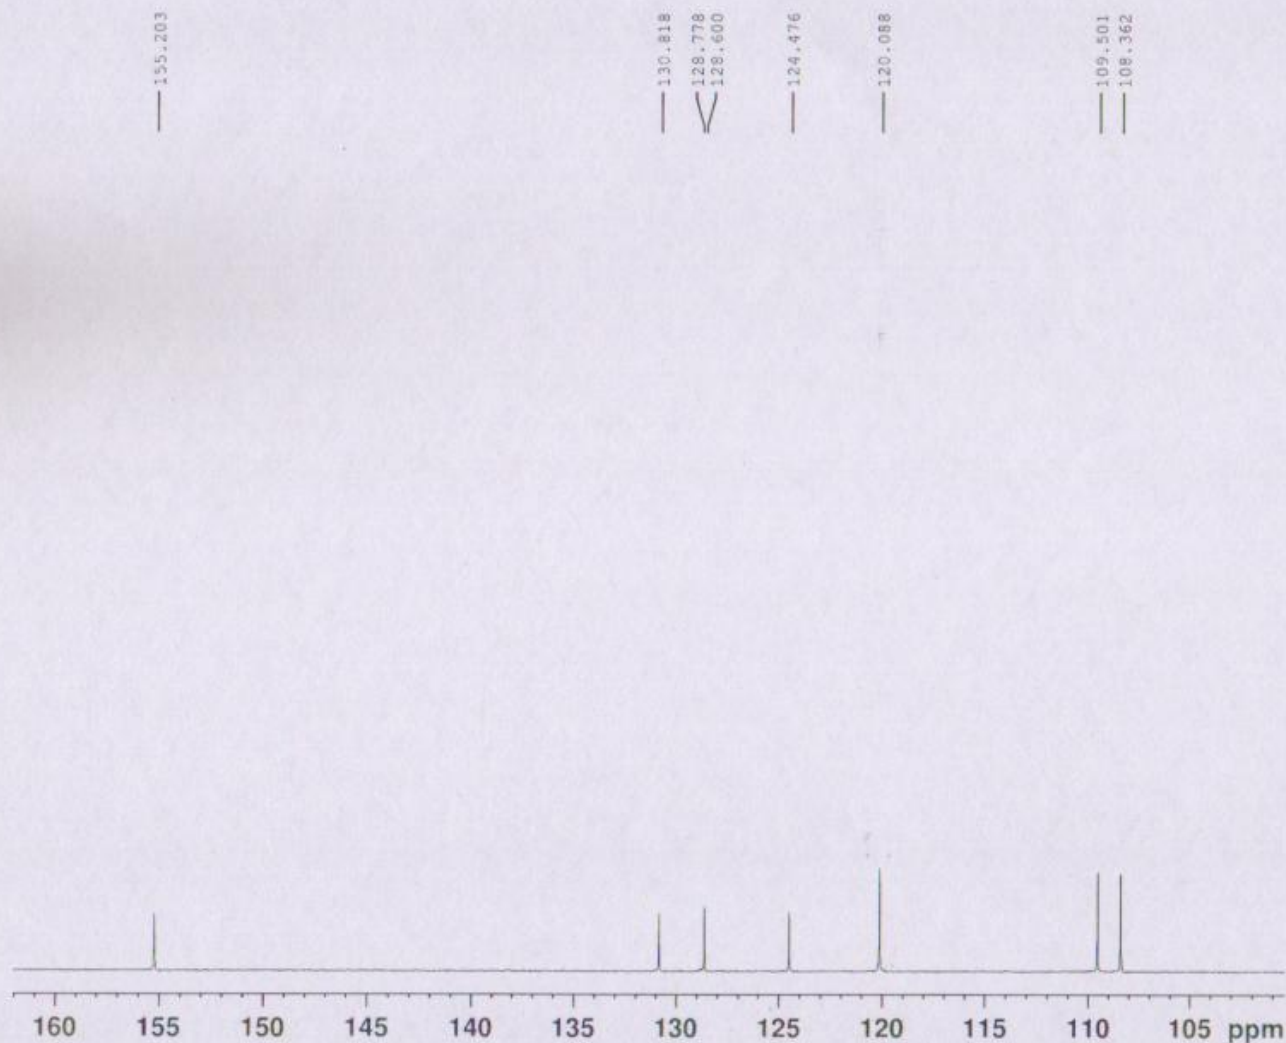

Current Data Parameters  
NAME 022211C4041-C6292-032  
EXPNO 2  
PROCNO 1

F2 - Acquisition Parameters  
Date\_ 20221123  
Time 6.46 h  
INSTRUM Avance  
PROBHD Z163739\_0419 ( )  
PULPROG zgpg30  
TD 65536  
SOLVENT DMSO  
NS 2000  
DS 4  
SWH 23809.523 Hz  
FIDRES 0.726609 Hz  
AQ 1.3762560 sec  
RG 101  
DW 21.000 usec  
DE 6.50 usec  
TE 298.7 K  
D1 2.00000000 sec  
D11 0.03000000 sec  
TDO 1  
SFO1 100.6706101 MHz  
NUC1 13C  
P0 2.67 usec  
P1 8.00 usec  
PLW1 99.05599976 W  
SFO2 400.3216013 MHz  
NUC2 1H  
CPDPRG2 waltz65  
PCPD2 90.00 usec  
PLW2 23.42200089 W  
PLW12 0.18505999 W  
PLW13 0.09308600 W

F2 - Processing parameters  
SI 32768  
SF 100.6605931 MHz  
WDW EM  
SSB 0  
LB 2.00 Hz  
GB 0  
PC 1.40

ANL-MCL3-NMR-007



# LCMS of 5-Chloro-1,3-dihydro-2H-benzo[d]imidazol-2-one (2b)

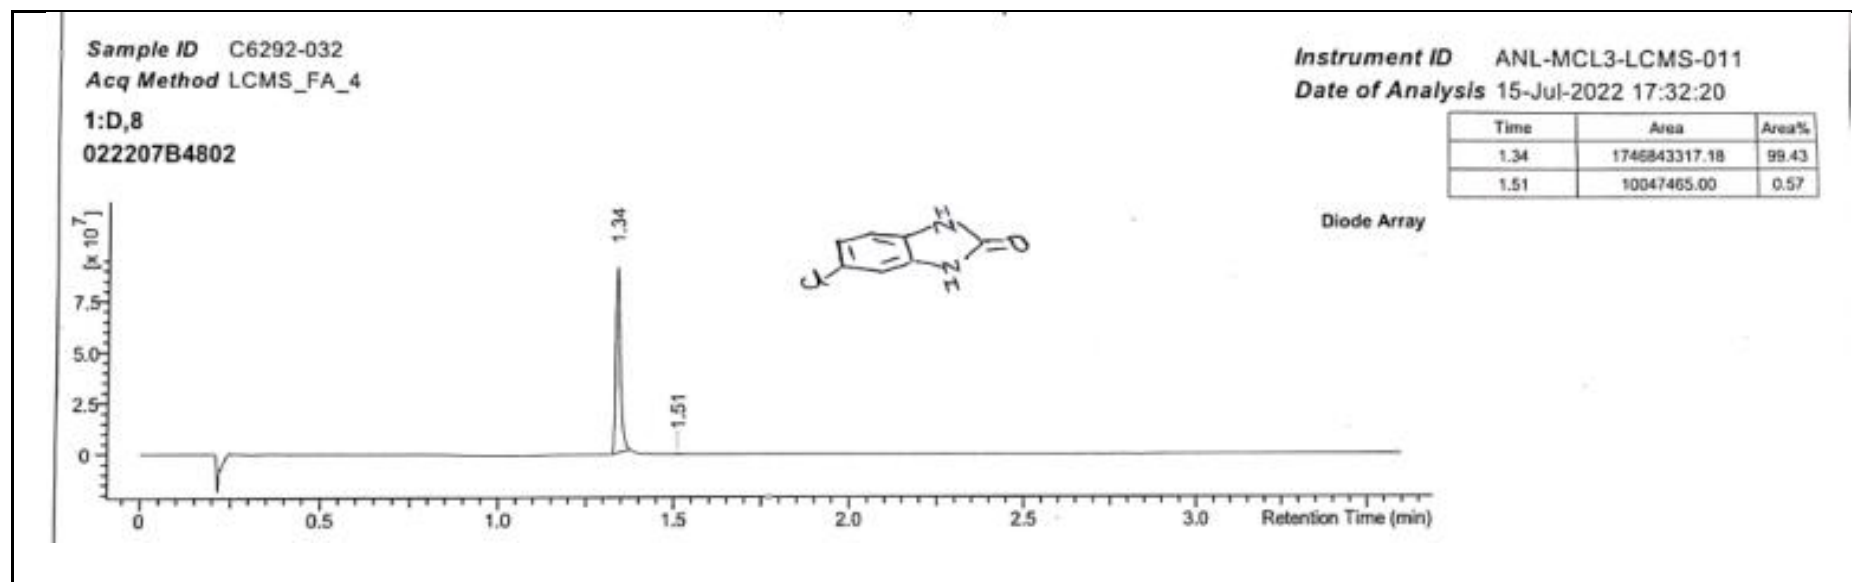

Sample ID C6292-032  
Acq Method LCMS\_FA\_4  
1:D,8  
022207B4802

Discovery Chemistry – Analytical Services

Instrument ID ANL-MCL3-LCMS-011  
Date of Analysis 15-Jul-2022 17:32:20

Retention Time: 1.388  
Ion Mode: ES+

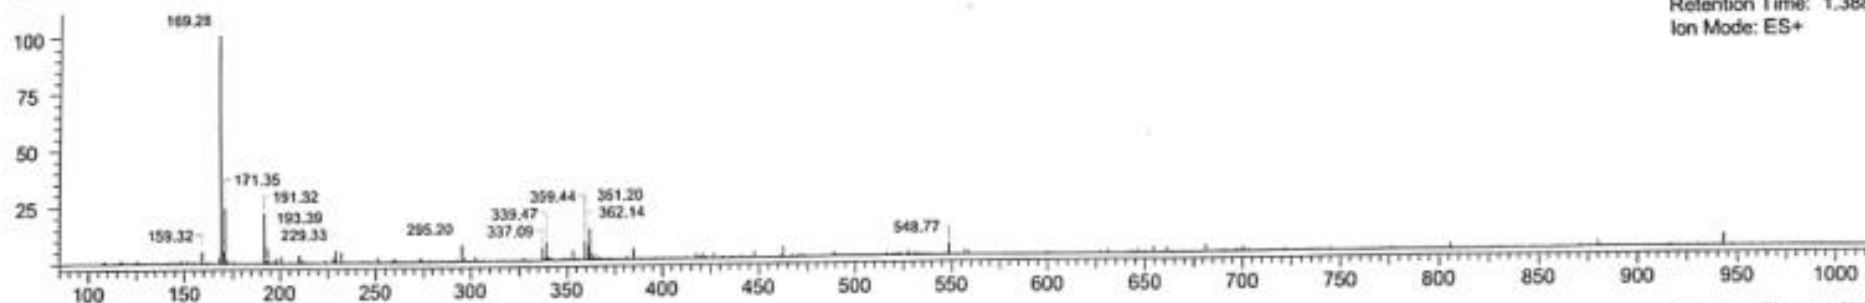

# <sup>1</sup>H NMR of 5-Bromo-1,3-dihydro-2H-benzo[d]imidazol-2-one (2c)

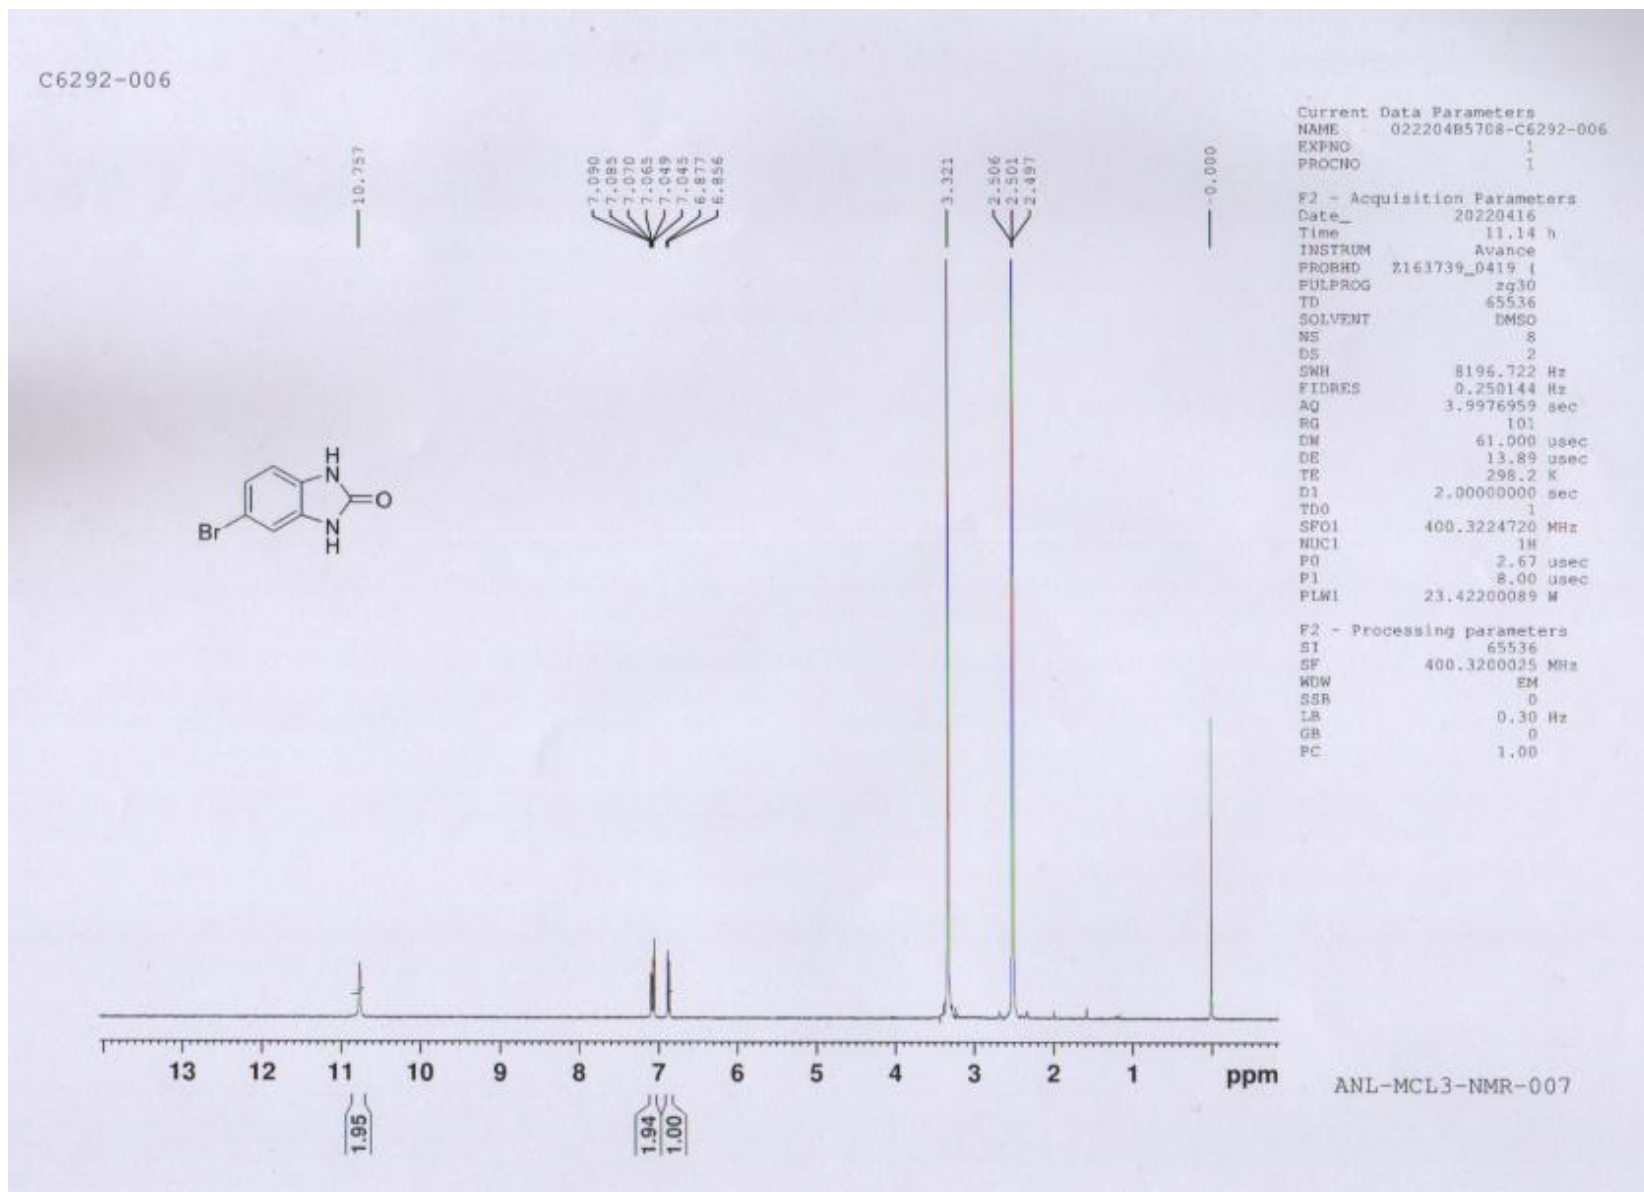

C6292-006

7.090  
7.085  
7.070  
7.065  
7.049  
7.045  
6.877  
6.856

Current Data Parameters  
NAME 022204B5708-C6292-006  
EXPNO 1  
PROCNO 1

F2 - Acquisition Parameters  
Date\_ 20220416  
Time 11.14 h  
INSTRUM Avance  
PROBHD 2163739\_0419 (   
PULPROG zg30  
TD 65536  
SOLVENT DMSO  
NS 8  
DS 2  
SKH 8196.722 Hz  
FIDRES 0.250144 Hz  
AQ 3.9976959 sec  
RG 101  
DK 61.000 usec  
DE 13.89 usec  
TE 298.2 K  
D1 2.00000000 sec  
TD0 1  
SFO1 400.3224720 MHz  
NUC1 1H  
P0 2.67 usec  
P1 8.00 usec  
PLW1 23.42200089 W

F2 - Processing parameters  
SI 65536  
SF 400.3200025 MHz  
WDW EM  
SSB 0  
LB 0.30 Hz  
GB 0  
PC 1.00

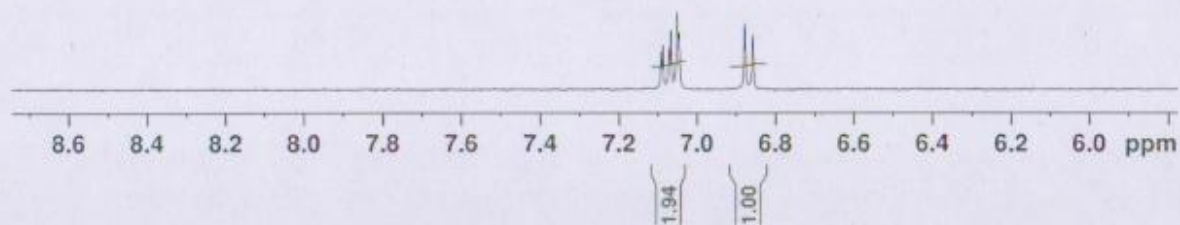

ANL-MCL3-NMR-007

# <sup>13</sup>C NMR of 5-Bromo-1,3-dihydro-2H-benzo[d]imidazol-2-one (2c)

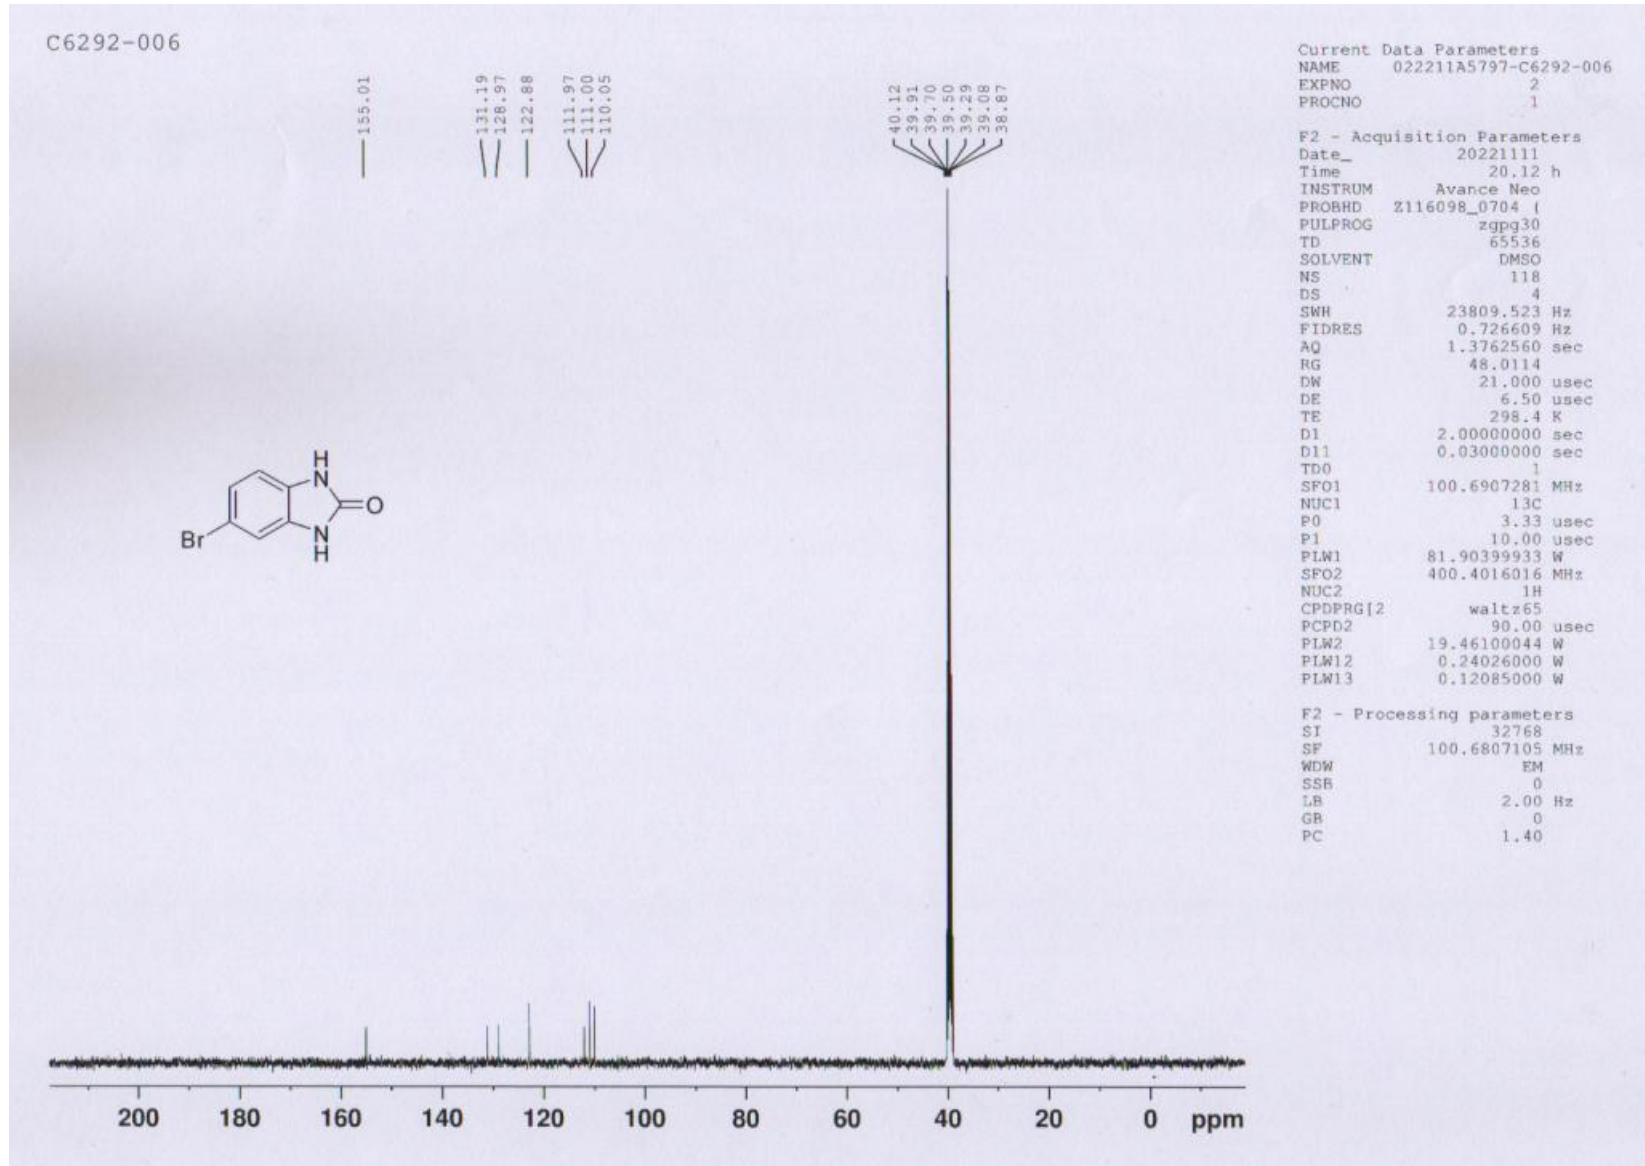

C6292-006

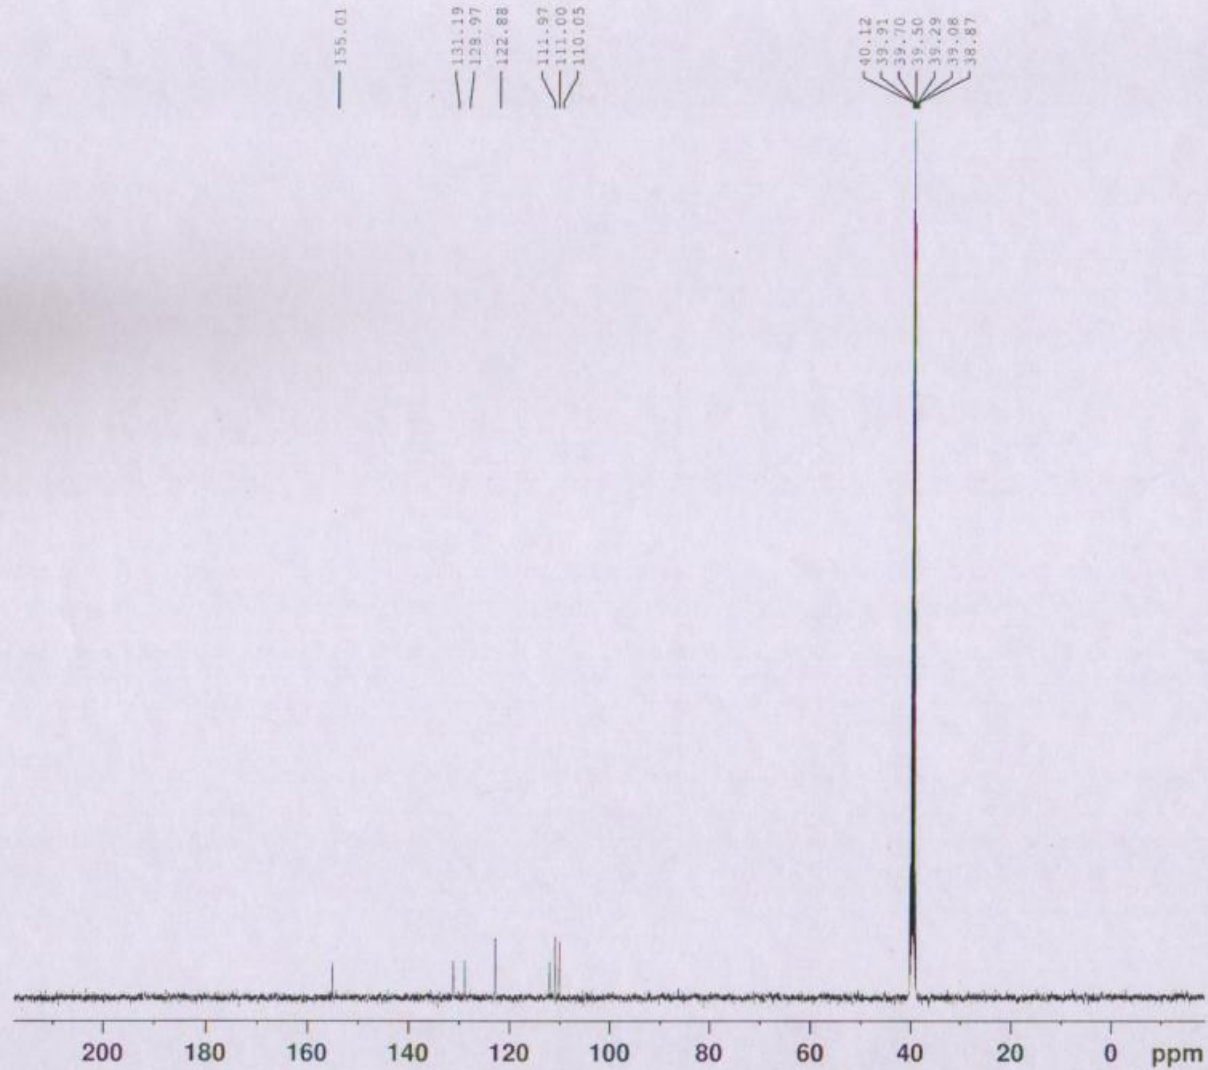

Current Data Parameters  
NAME 022211A5797-C6292-006  
EXPNO 2  
PROCNO 1

F2 - Acquisition Parameters  
Date\_ 20221111  
Time 20.12 h  
INSTRUM Avance Neo  
PROBHD Z116098\_0704 ( )  
PULPROG zgpg30  
TD 65536  
SOLVENT DMSO  
NS 118  
DS 4  
SWH 23809.523 Hz  
FIDRES 0.726609 Hz  
AQ 1.3762560 sec  
RG 48.0114  
DW 21.000 usec  
DE 6.50 usec  
TE 298.4 K  
D1 2.0000000 sec  
D11 0.03000000 sec  
TD0 1  
SFO1 100.6907281 MHz  
NUC1 13C  
P0 3.33 usec  
P1 10.00 usec  
PLW1 81.90399933 W  
SFO2 400.4016016 MHz  
NUC2 1H  
CPDPRG[2] waltz65  
PCPD2 90.00 usec  
PLW2 19.46100044 W  
PLW12 0.24026000 W  
PLW13 0.12085000 W

F2 - Processing parameters  
SI 32768  
SF 100.6207105 MHz  
WDW EM  
SSB 0  
LB 2.00 Hz  
GB 0  
PC 1.40

# LCMS of 5-Bromo-1,3-dihydro-2H-benzo[d]imidazol-2-one (2c)

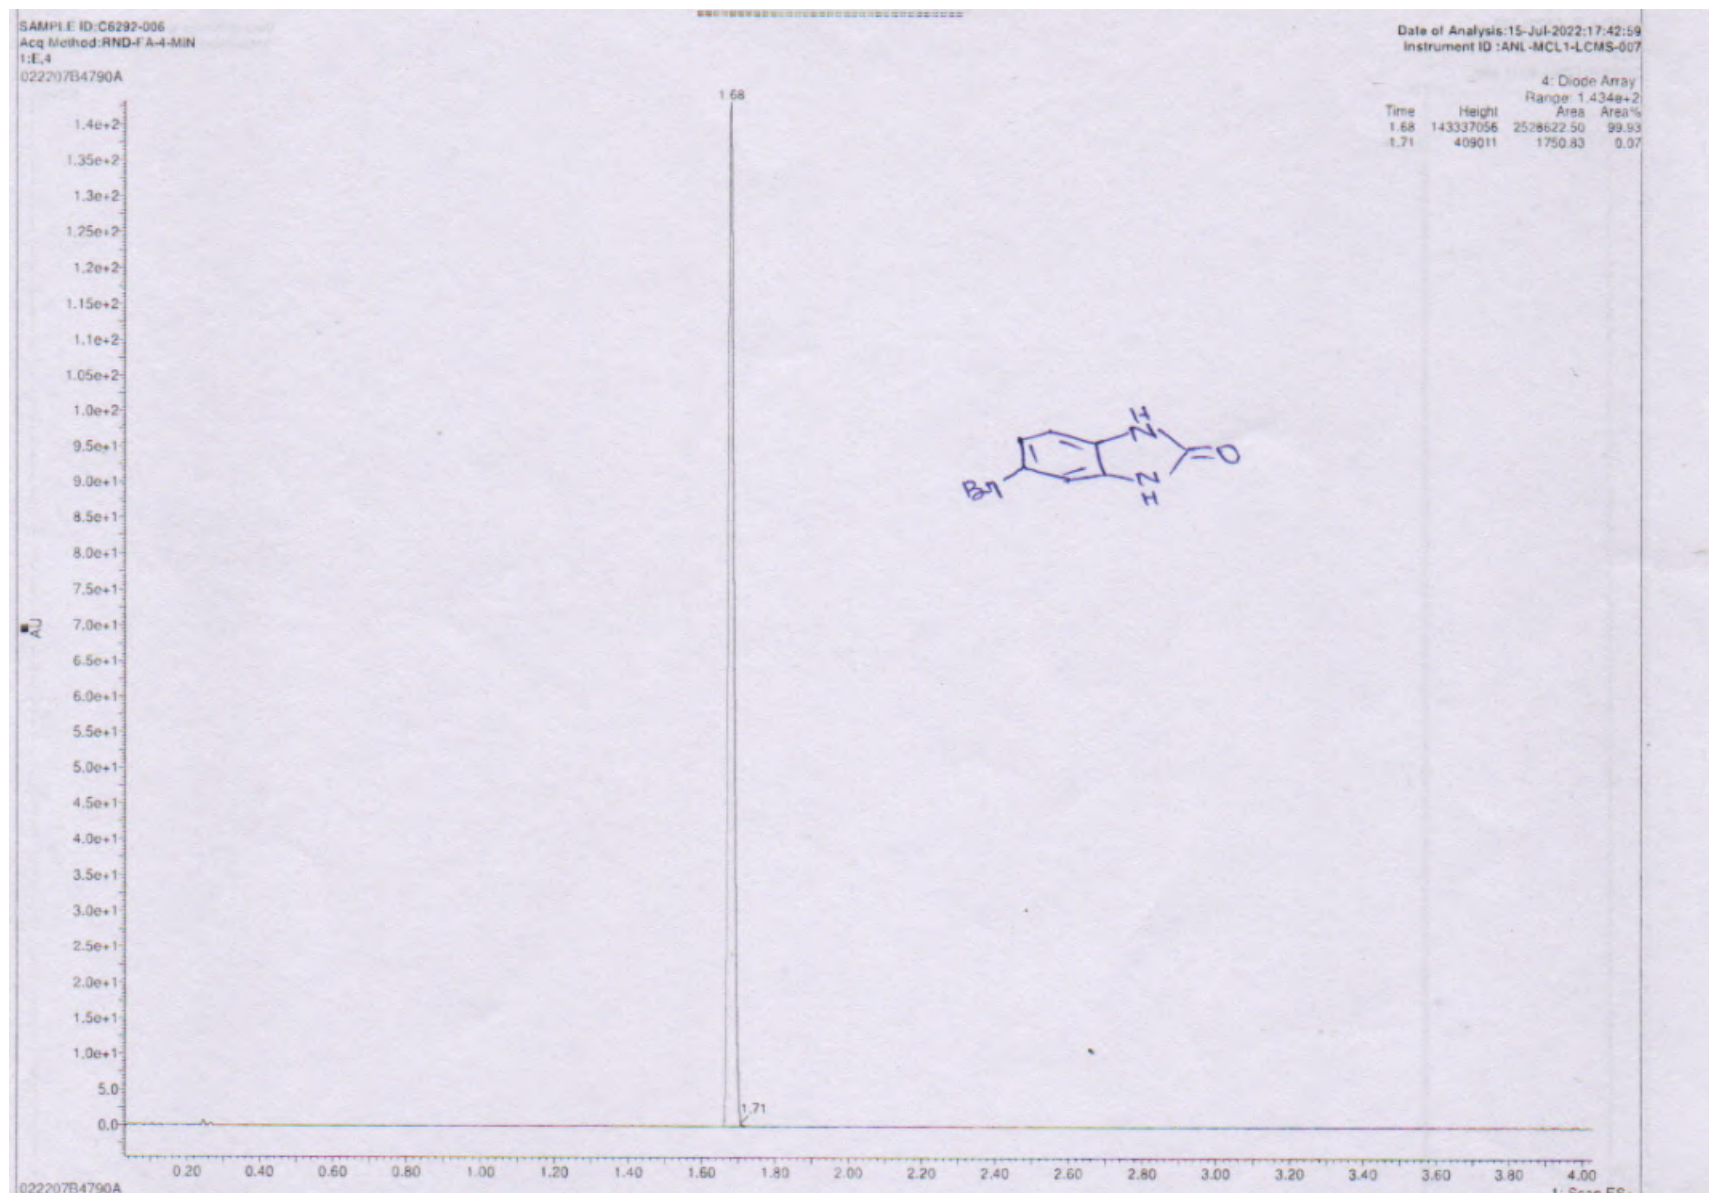





# <sup>1</sup>H NMR of 5-Iodo-1,3-dihydro-2H-benzo[d]imidazol-2-one (2d)

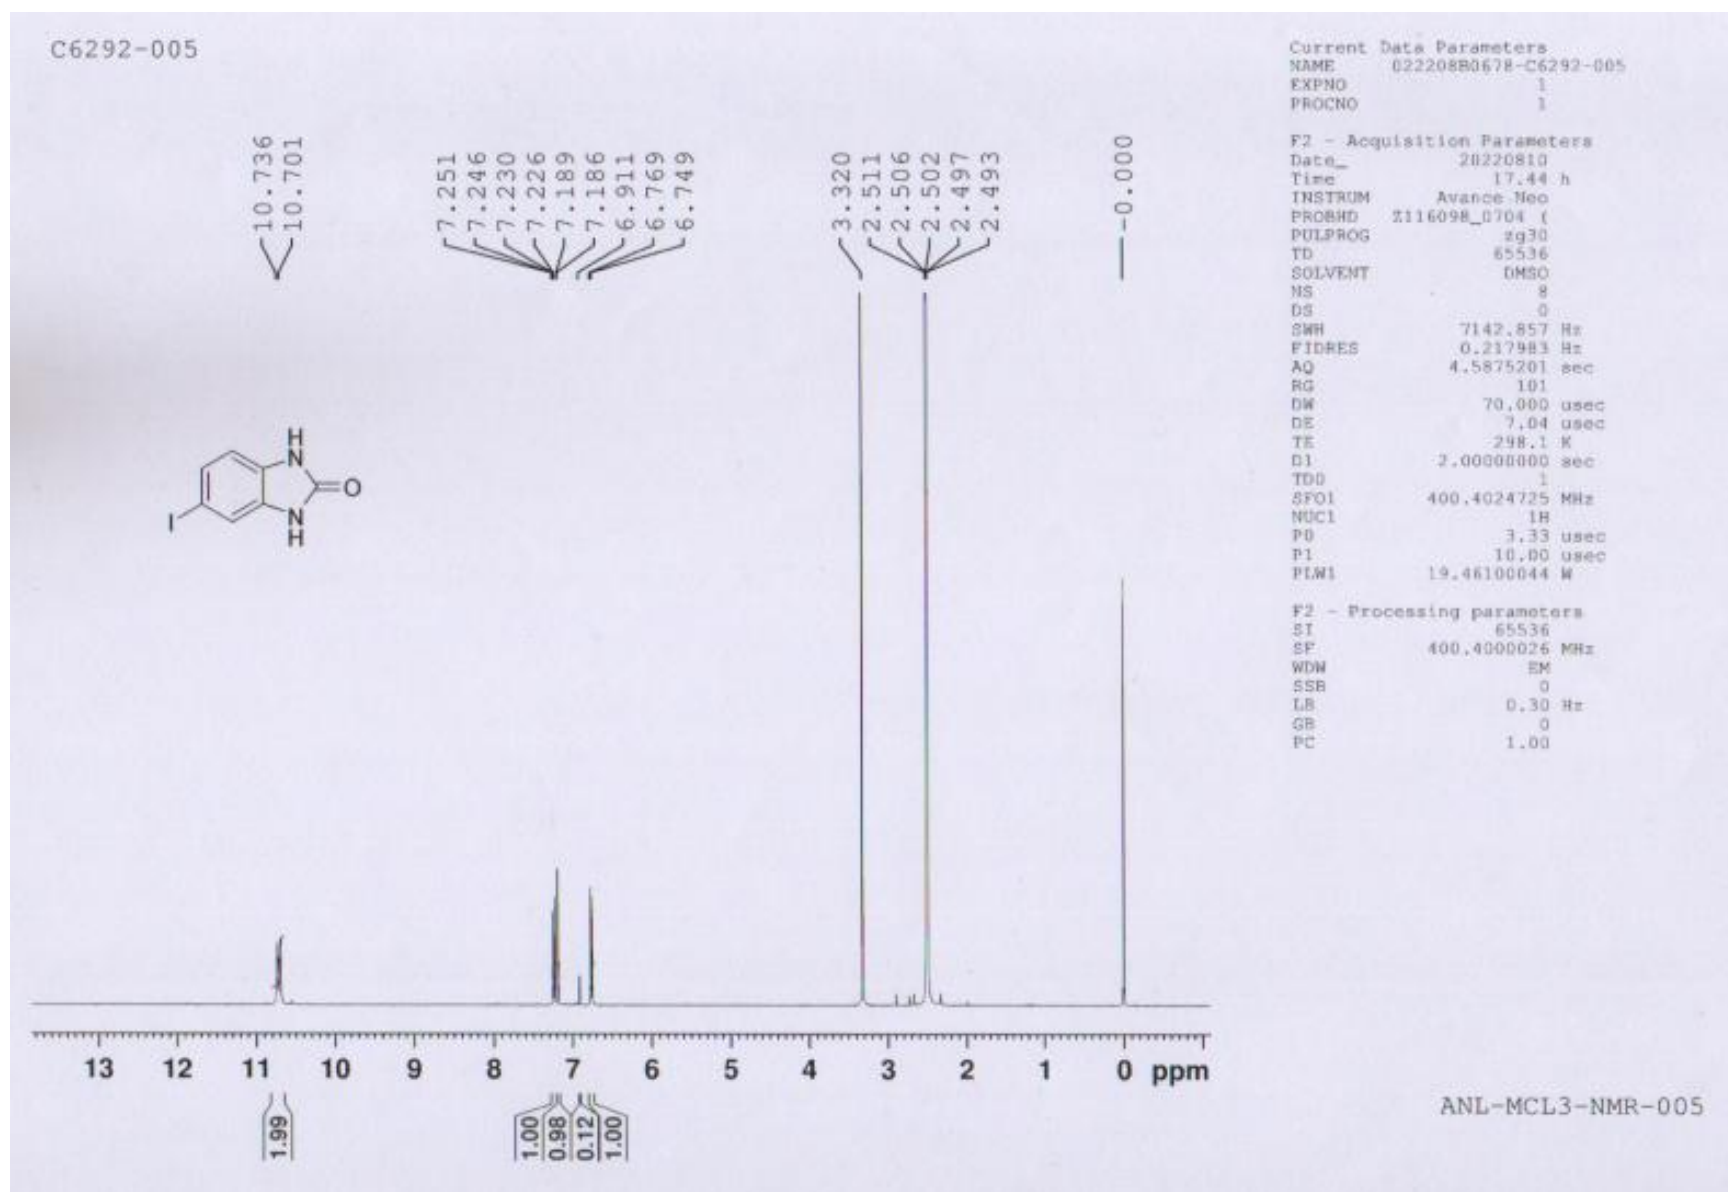

C6292-005

7.251  
7.246  
7.230  
7.226  
7.189  
7.186  
— 6.911  
6.769  
6.749

Current Data Parameters  
NAME 02220880678-C6292-005  
EXPNO 1  
PROCNO 1

F2 - Acquisition Parameters  
Date\_ 20220810  
Time 17.44 h  
INSTRUM Avance Neo  
PROBHD z116098\_0704 (z)  
PULPROG zg30  
TD 65536  
SOLVENT DMSO  
NS 8  
DS 0  
SWH 7142.857 Hz  
FIDRES 0.217983 Hz  
AQ 4.5875201 sec  
RG 101  
DM 70.000 usec  
DE 7.04 usec  
TE 298.1 K  
D1 2.00000000 sec  
TDO 1  
SFO1 400.4024725 MHz  
NUC1 1H  
P0 3.33 usec  
P1 10.00 usec  
PLWI 19.46100044 W

F2 - Processing parameters  
SI 65536  
SF 400.4000026 MHz  
WDW EM  
SSB 0  
LB 0.30 Hz  
GB 0  
PC 1.00

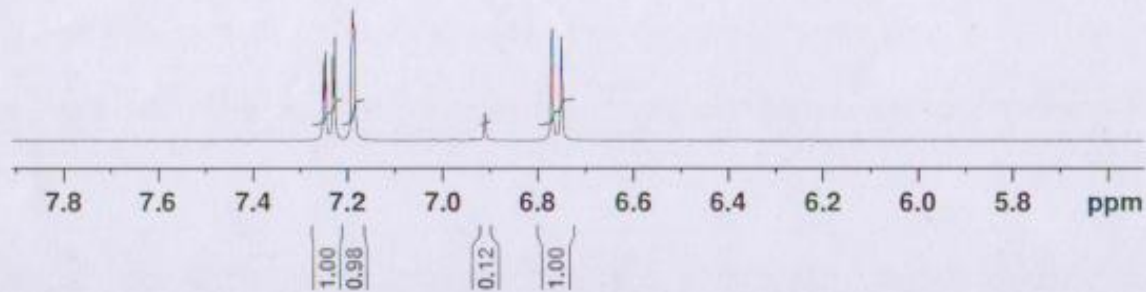

ANL-MCL3-NMR-005

# <sup>13</sup>C NMR of 5-Iodo-1,3-dihydro-2H-benzo[d]imidazol-2-one (2d)

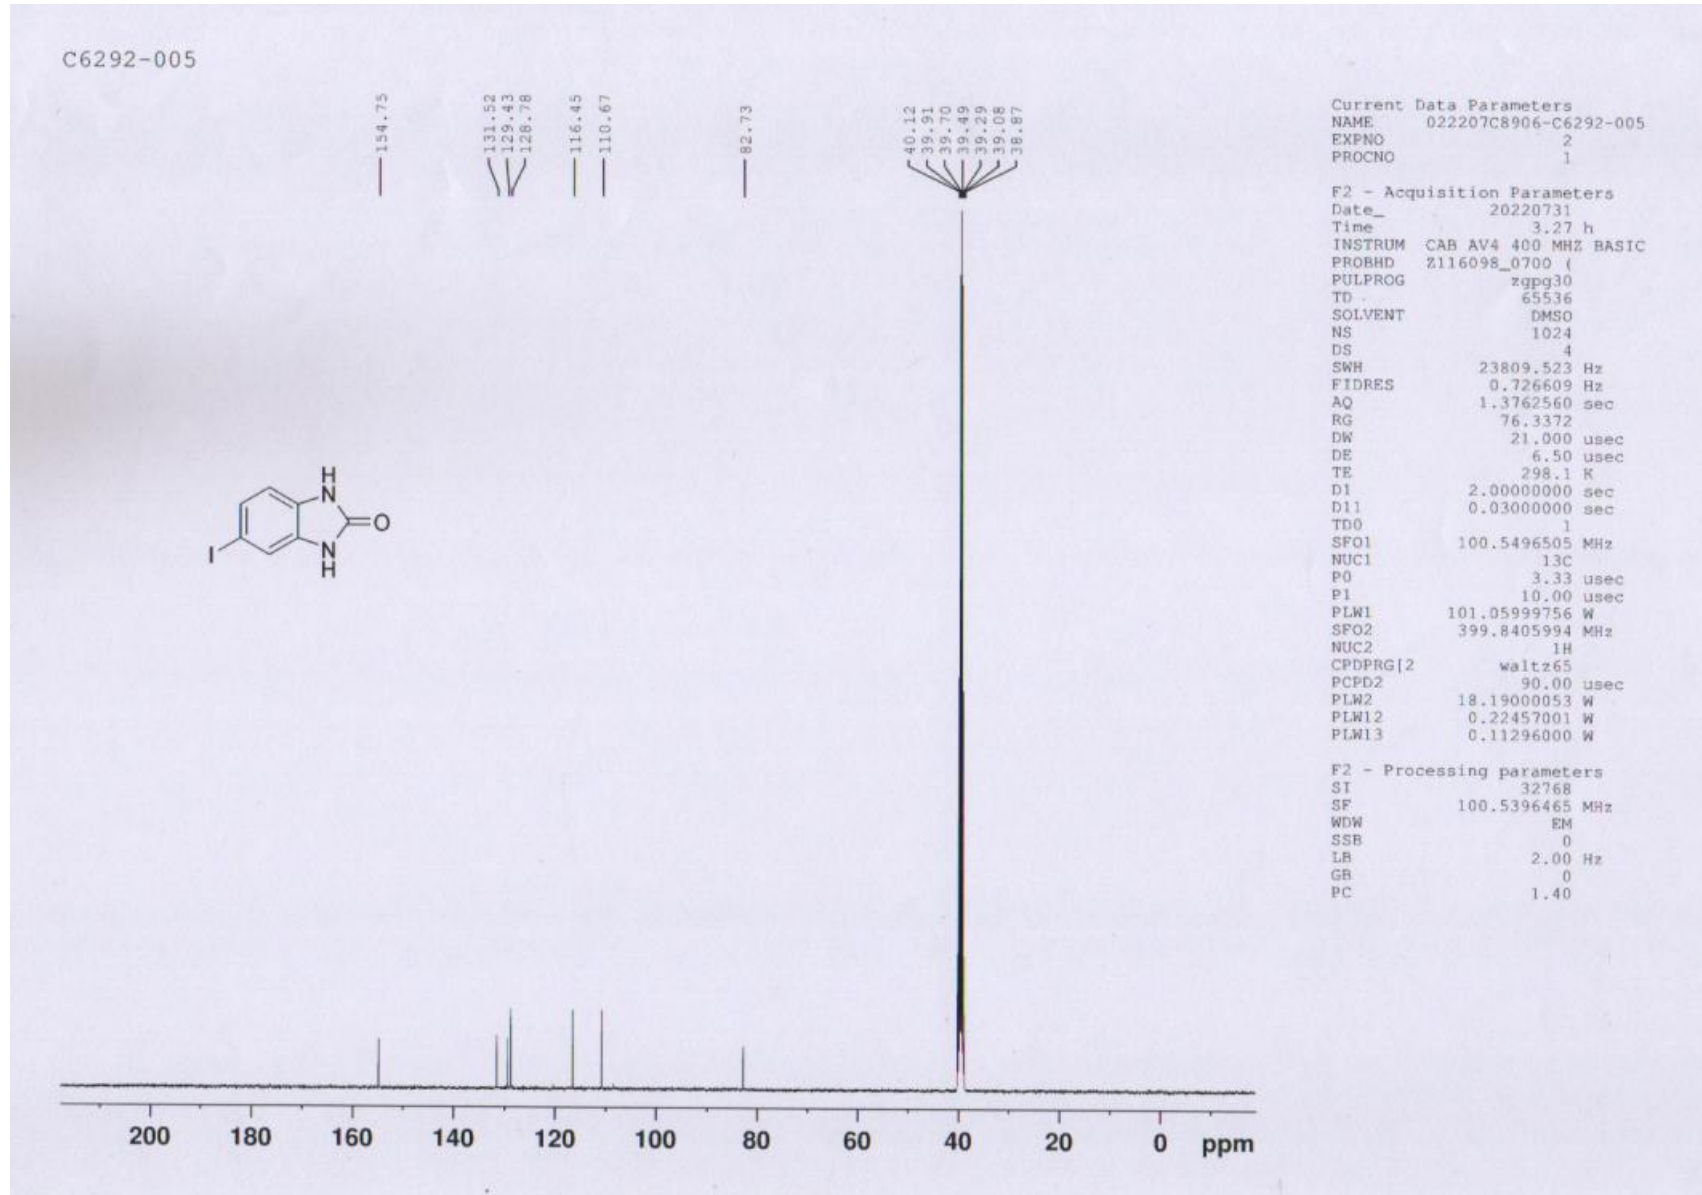

C6292-005

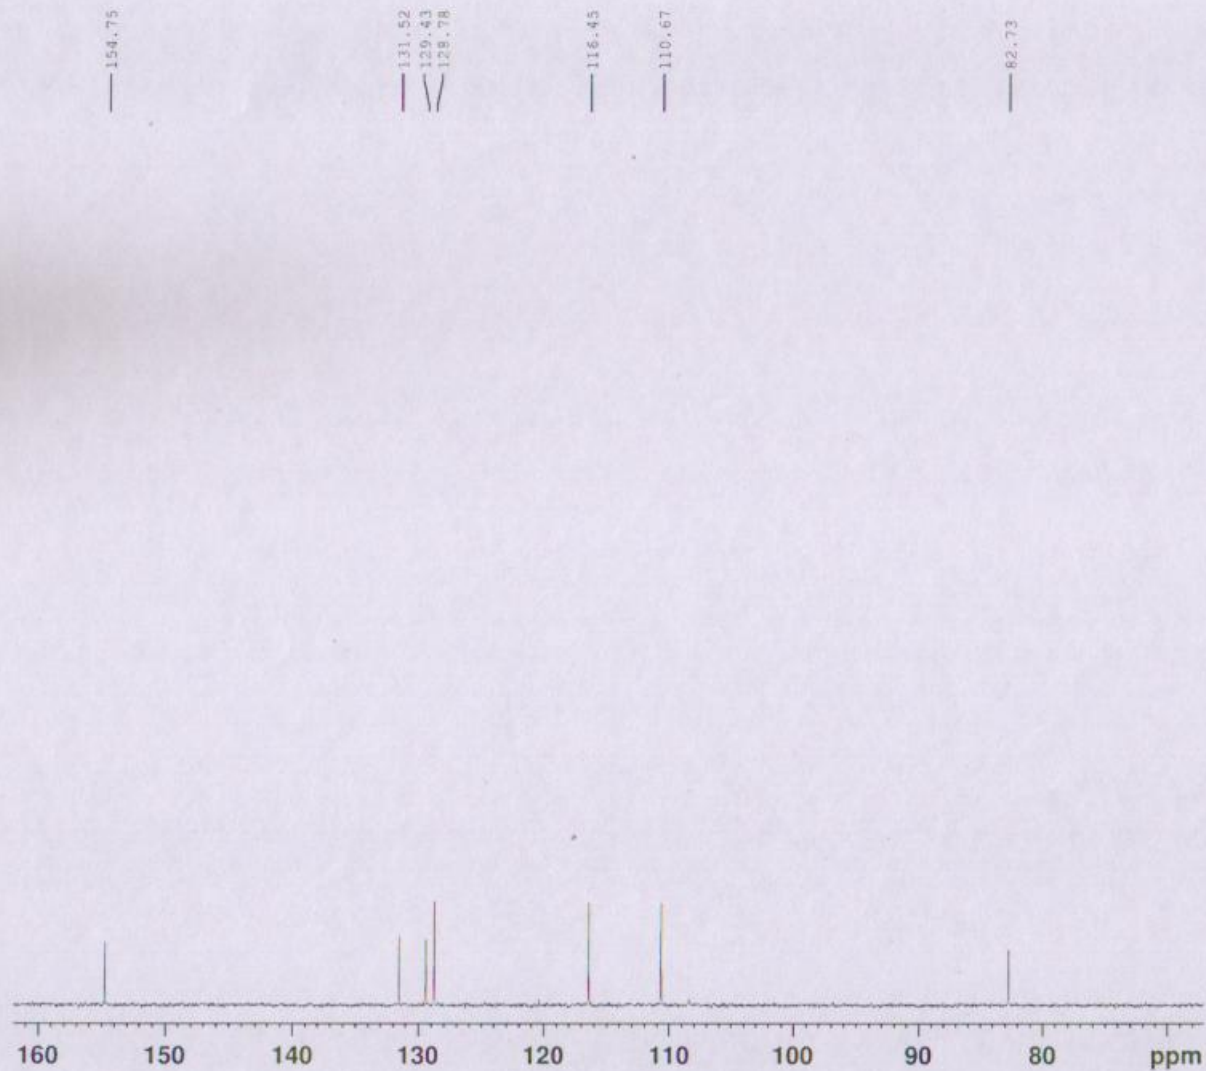

Current Data Parameters  
NAME 022207C8906-C6292-005  
EXPNO 2  
PROCNO 1

F2 - Acquisition Parameters  
Date\_ 20220731  
Time 3.27 h  
INSTRUM CAB AV4 400 MHZ BASIC  
PROBHD Z116098\_0700 ( )  
PULPROG zgpg30  
TD 65536  
SOLVENT DMSO  
NS 1024  
DS 4  
SWH 23809.523 Hz  
FIDRES 0.726609 Hz  
AQ 1.3762560 sec  
RG 76.3372  
DW 21.000 usec  
DE 6.50 usec  
TE 298.1 K  
D1 2.0000000 sec  
D11 0.0300000 sec  
TD0 1  
SFO1 100.5496505 MHz  
NUC1 13C  
P0 3.33 usec  
P1 10.00 usec  
PLW1 101.05999756 W  
SFO2 399.8405994 MHz  
NUC2 1H  
CPDPRG2 waltz65  
PCPD2 90.00 usec  
PLW2 18.19000053 W  
PLW12 0.22457001 W  
PLW13 0.11296000 W

F2 - Processing parameters  
SI 32768  
SF 100.5396465 MHz  
WDW EM  
SSB 0  
LB 2.00 Hz  
GB 0  
PC 1.40

# LCMS of 5-Iodo-1,3-dihydro-2H-benzo[d]imidazol-2-one (2d)

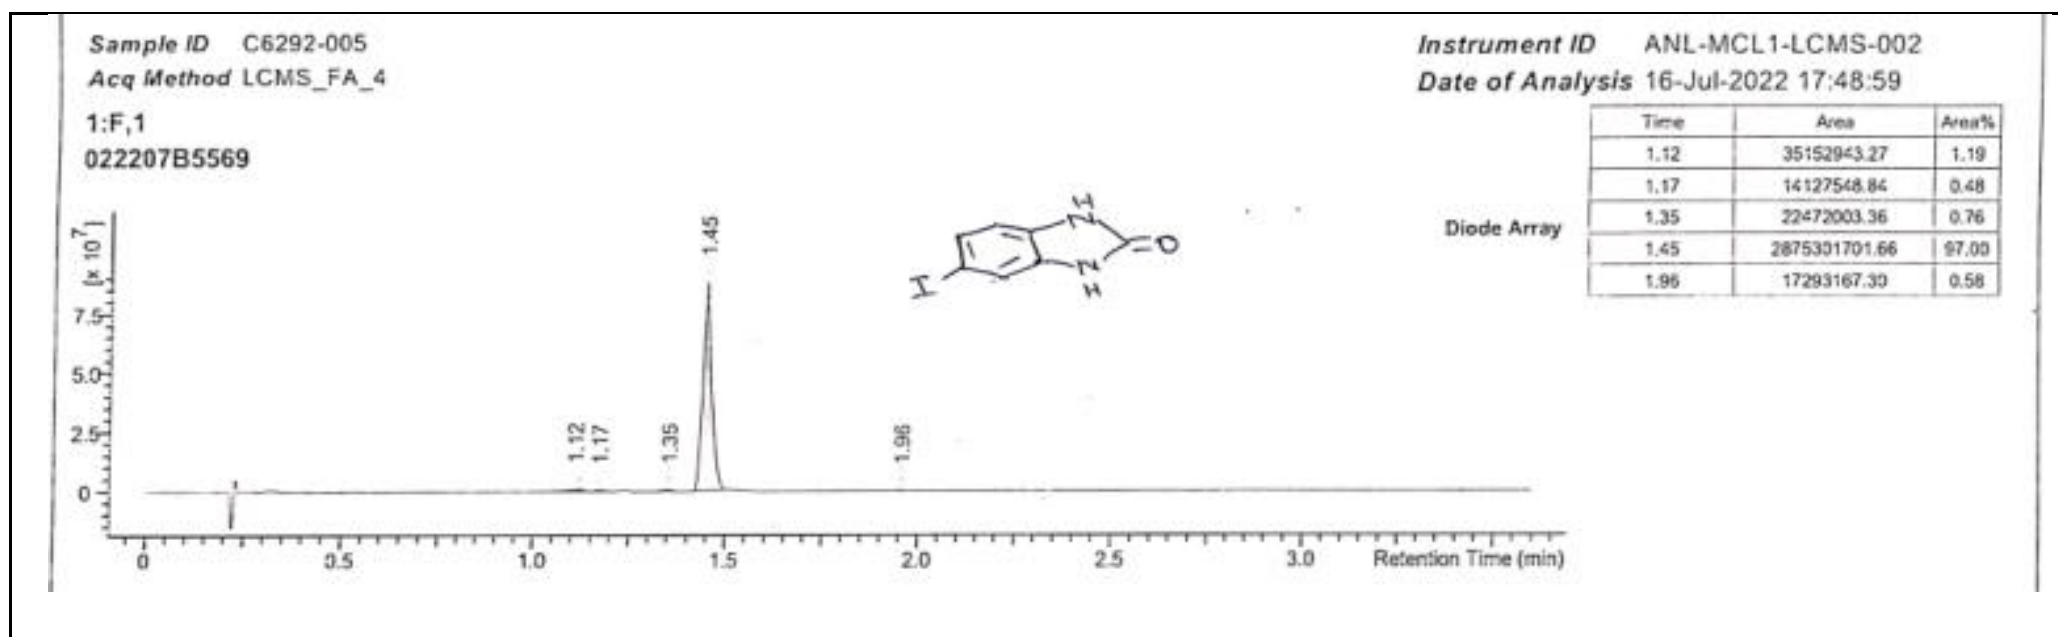

Sample ID C6292-005  
Acq Method LCMS\_FA\_4  
1:F,1  
022207B5569

Discovery Chemistry – Analytical Services

Instrument ID ANL-MCL1-LCMS-002  
Date of Analysis 16-Jul-2022 17:48:59

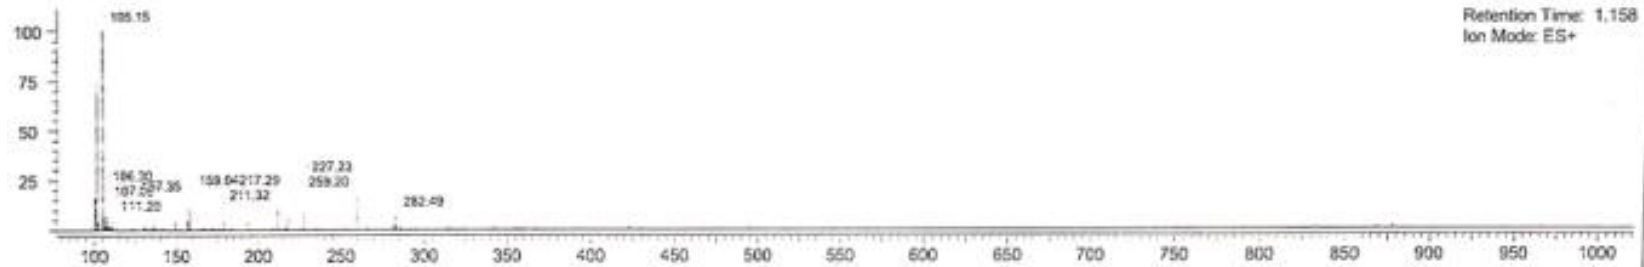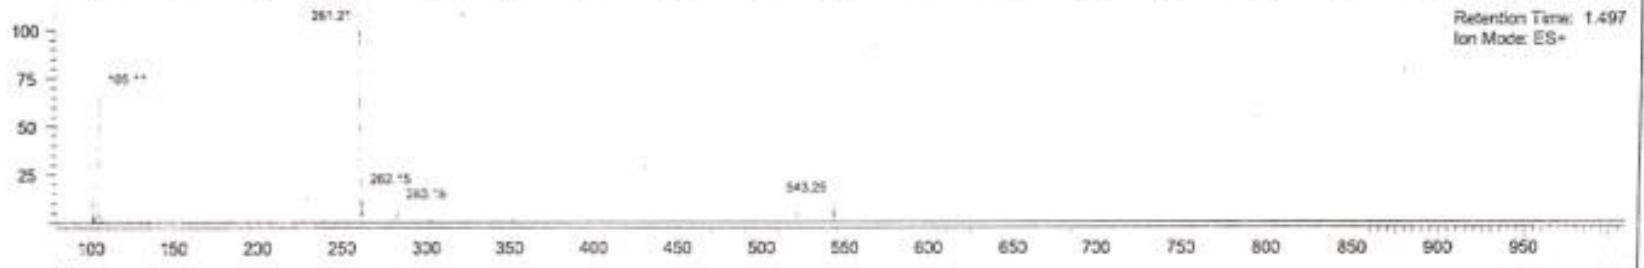

# <sup>1</sup>H NMR of 5-Methyl-1,3-dihydro-2H-benzo[d]imidazol-2-one (2e)

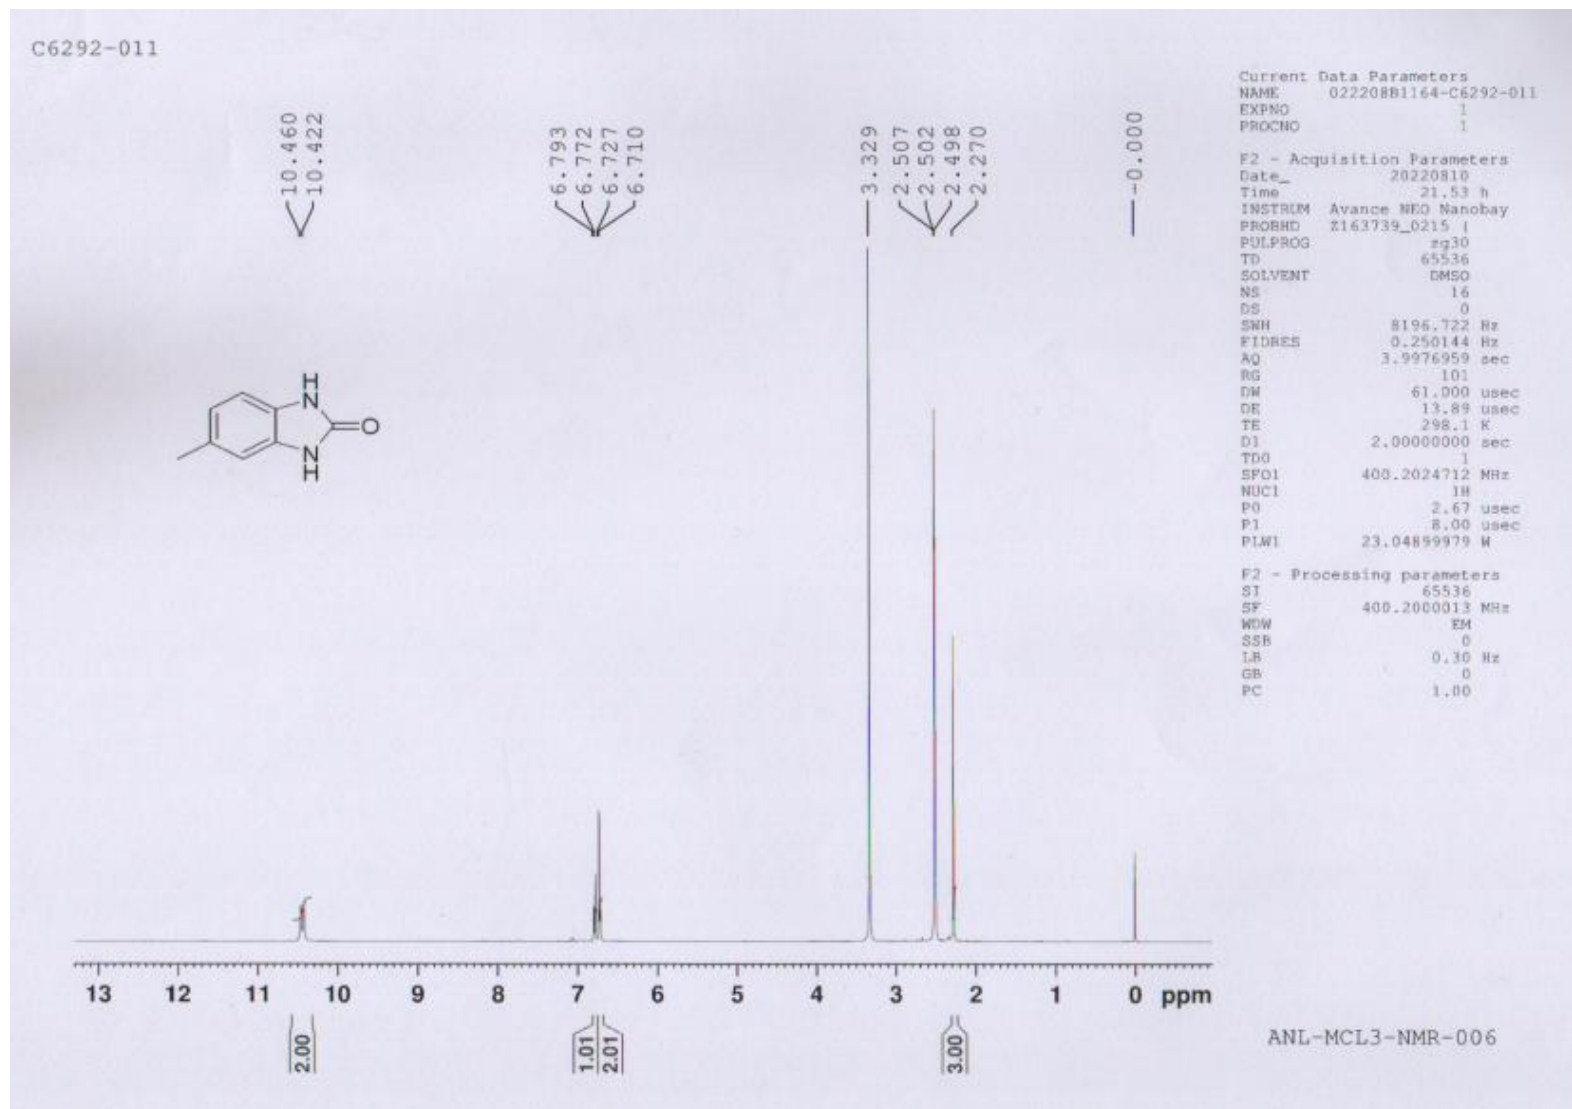

C6292-011

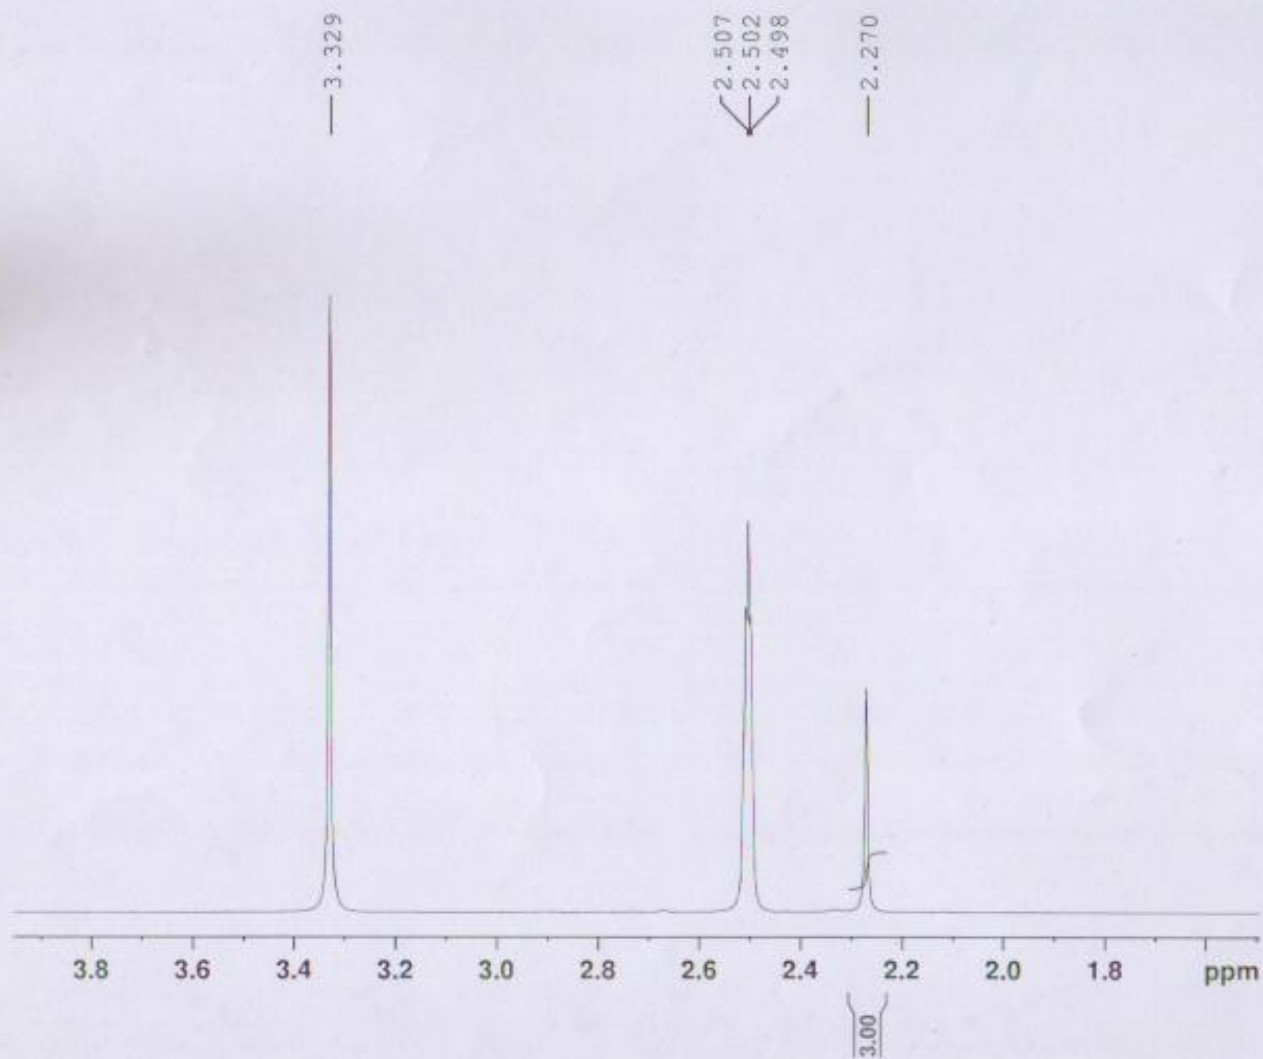

Current Data Parameters  
NAME 022208B1164-C6292-011  
EXPNO 1  
PROCNO 1

F2 - Acquisition Parameters  
Date\_ 20220810  
Time 21.53 h  
INSTRUM Avance NEO Nanobay  
PROBHD Z163739\_0215 (   
PULPROG zg30  
TD 65536  
SOLVENT DMSO  
NS 16  
DS 0  
SWH 8196.722 Hz  
FIDRES 0.250144 Hz  
AQ 3.9976959 sec  
RG 101  
DW 61.000 usec  
DE 13.89 usec  
TE 298.1 K  
D1 2.00000000 sec  
TDO 1  
SFO1 400.2024712 MHz  
NUC1 1H  
P0 2.57 usec  
P1 8.00 usec  
PLM1 23.04899979 W

F2 - Processing parameters  
SI 65536  
SF 400.2000013 MHz  
WDW EM  
SSB 0  
LB 0.30 Hz  
GB 0  
PC 1.00

ANL-MCL3-NMR-006



C6292-011

— 6.793  
— 6.772  
— 6.727  
— 6.710

Current Data Parameters  
NAME 022206B1164-C6292-011  
EXPNO 1  
PROCNO 1

F2 - Acquisition Parameters  
Date\_ 20220810  
Time 21.53 h  
INSTRUM Avance NEO Nanobay  
PROBHD Z163739\_0215 (   
PULPROG zg30  
TD 65536  
SOLVENT DMSO  
NS 16  
DS 0  
SWH 8196.722 Hz  
FIDRES 0.250144 Hz  
AQ 3.9976959 sec  
RG 101  
DW 61.000 usec  
DE 13.89 usec  
TE 298.1 K  
D1 2.00000000 sec  
TDO 1  
SFO1 400.2024712 MHz  
NUC1 1H  
P0 2.67 usec  
P1 8.00 usec  
PLW1 23.04899979 W

F2 - Processing parameters  
SI 65536  
SF 400.2000013 MHz  
WDW EM  
SSB 0  
LB 0.30 Hz  
GB 0  
PC 1.00

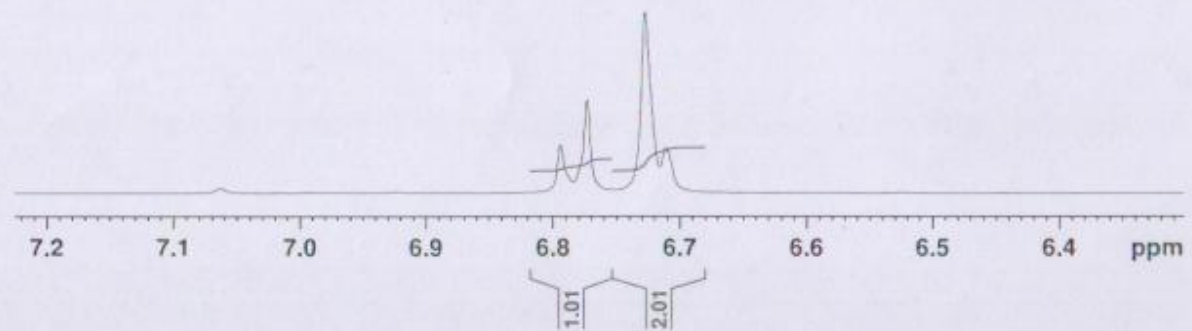

ANL-MCL3-NMR-006

# <sup>13</sup>C NMR of 5-Methyl-1,3-dihydro-2H-benzo[d]imidazol-2-one (2e)

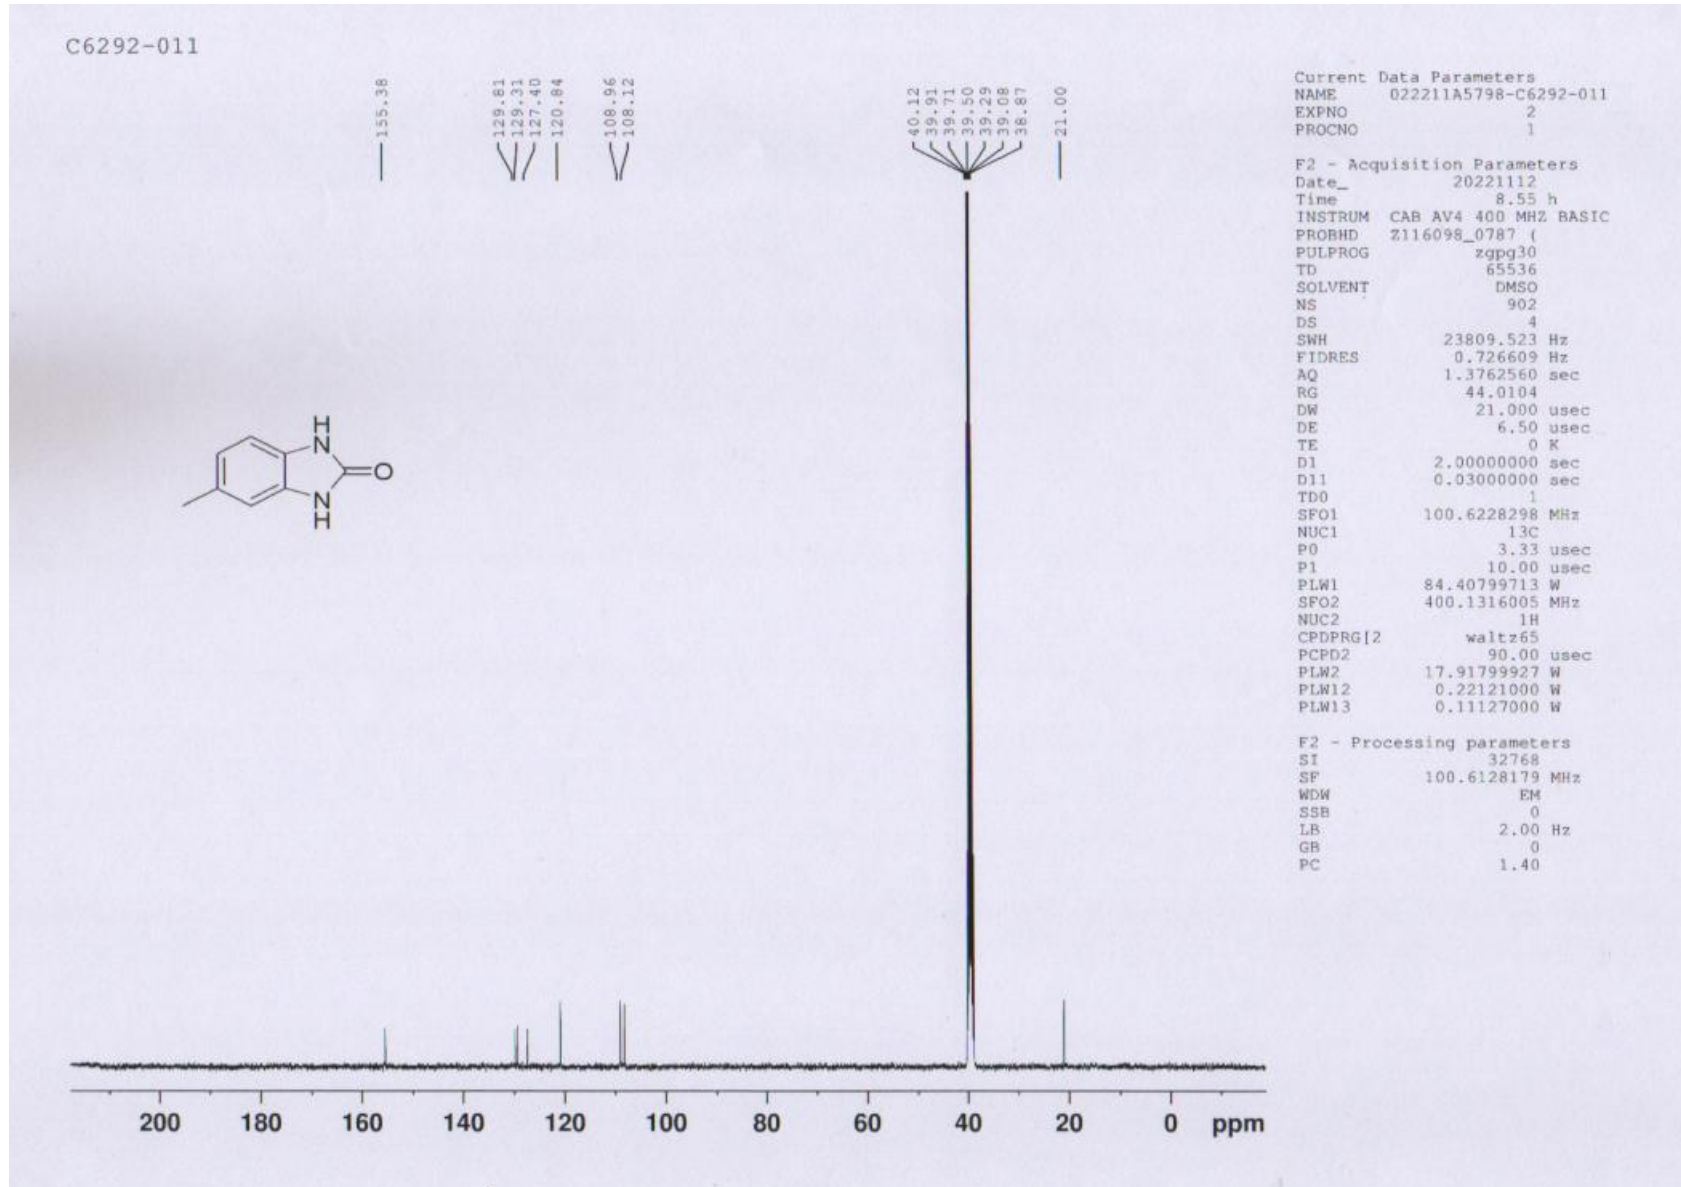

C6292-011

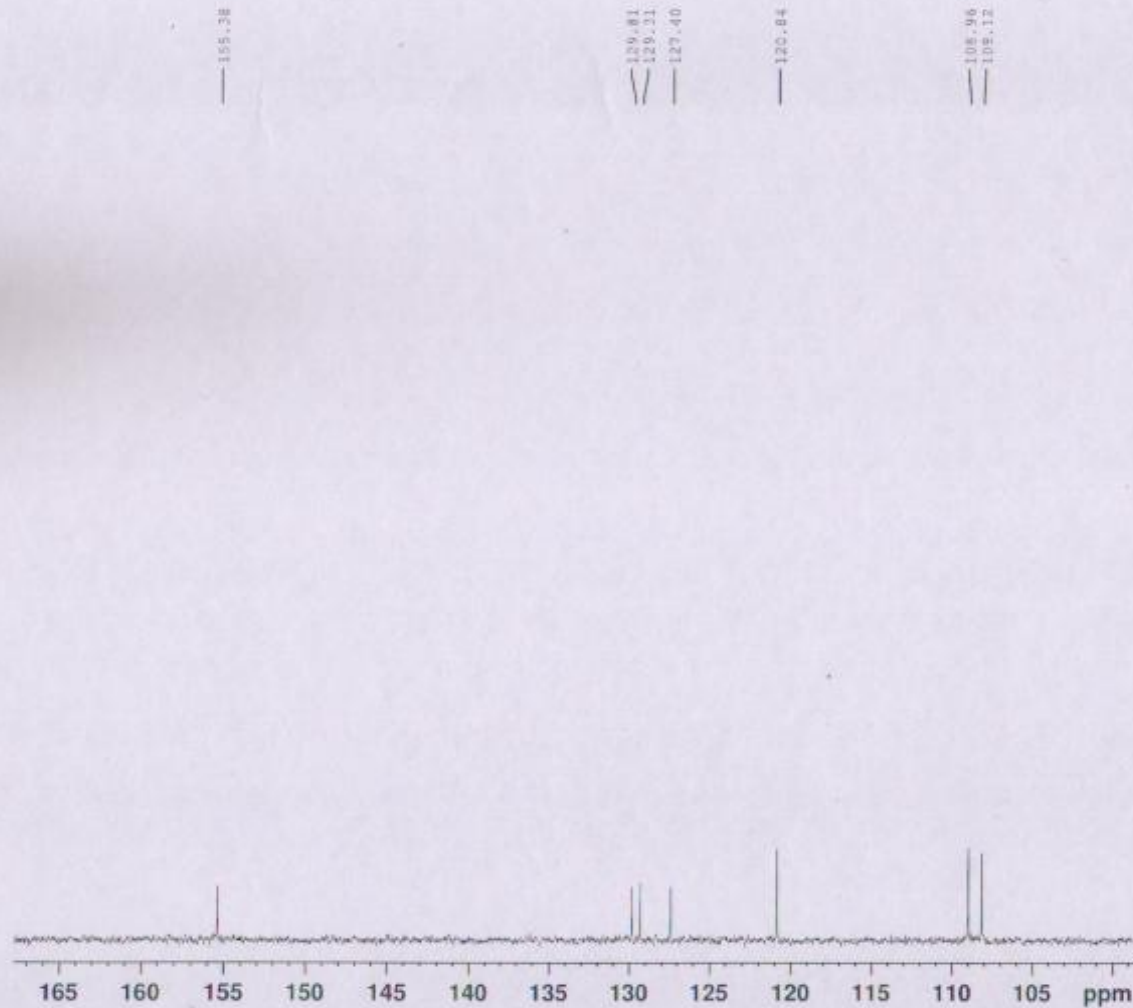

Current Data Parameters  
NAME 012211A5798-C6292-011  
EXPNO 2  
PROCNO 1

F2 - Acquisition Parameters  
Date\_ 20221112  
Time 8.55 h  
INSTRUM CAS AV4 400 MHz BASIC  
PROBHD Z116098\_0787 (1  
PULPROG zgpg30  
TD 65536  
SOLVENT DMSO  
NS 902  
DS 4  
SWH 21809.521 Hz  
FIDRES 0.724609 Hz  
AQ 1.3762560 sec  
RG 44.0104  
DW 21.000 usec  
DE 6.50 usec  
TE 300 K  
D1 2.00000000 sec  
D11 0.03000000 sec  
TD0 1  
SFO1 100.6228298 MHz  
NUC1 13C  
P0 3.33 usec  
P1 10.00 usec  
PLW1 84.40799713 W  
SFO2 400.1316005 MHz  
NUC2 1H  
CPDPRG12 waltz65  
PCPD2 90.00 usec  
PLW2 17.91799927 W  
PLW12 0.22121000 W  
PLW13 0.11127000 W

F2 - Processing parameters  
SI 32768  
SF 100.6128179 MHz  
WDW EM  
SSB 0  
LB 2.00 Hz  
GB 0  
PC 1.40

C6292-011

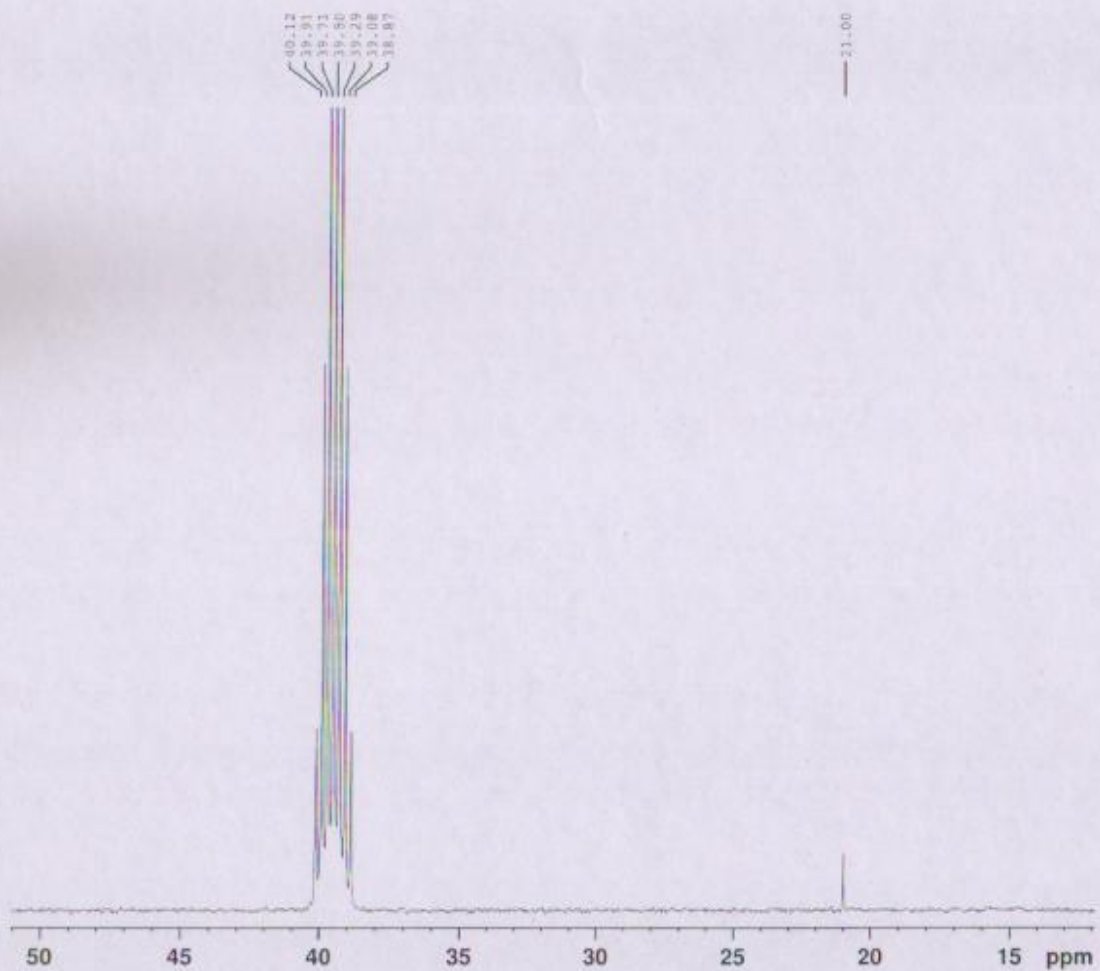

Current Data Parameters  
NAME 012211A5798-c6292-011  
EXPNO 2  
PROCNO 1

F2 - Acquisition Parameters  
Date\_ 20221112  
Time 8.55 h  
INSTRUM CAB AV4 400 MHz BASIC  
PROBHD Z116098\_0787 f  
PULPROG zgpg30  
TD 65536  
SOLVENT DMSO  
NS 902  
DS 4  
SWH 23809.523 Hz  
FIDRES 0.726609 Hz  
AQ 1.3762560 sec  
RG 44.0104  
DW 21.000 usec  
DE 6.50 usec  
TE C K  
D1 2.00000000 sec  
D11 0.03000000 sec  
TDO 1  
SFO1 100.6228298 MHz  
NUC1 13C  
P0 3.33 usec  
P1 10.00 usec  
PLW1 84.40799713 W  
SFO2 400.1316005 MHz  
NUC2 1H  
CFDPRG(2) waltz65  
PCPD2 90.00 usec  
PLW2 17.91799927 W  
PLW12 0.22121000 W  
PLW13 0.11127000 W

F2 - Processing parameters  
SI 32768  
SF 100.6128179 MHz  
WDW EM  
SSB 0  
LB 2.00 Hz  
GB 0  
PC 1.40

# LCMS of 5-Methyl-1,3-dihydro-2H-benzo[d]imidazol-2-one (2e)

Sample ID C6292-011  
Acq Method LCMS\_FA\_4  
1:E,1  
022207B4793

Instrument ID ANL-MCL3-LCMS-011  
Date of Analysis 15-Jul-2022 17:43:43

| Time | Area         | Area% |
|------|--------------|-------|
| 1.27 | 600686468.86 | 94.37 |
| 1.82 | 23197185.74  | 3.64  |
| 2.02 | 12645678.90  | 1.99  |

Diode Array

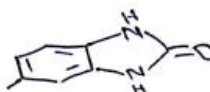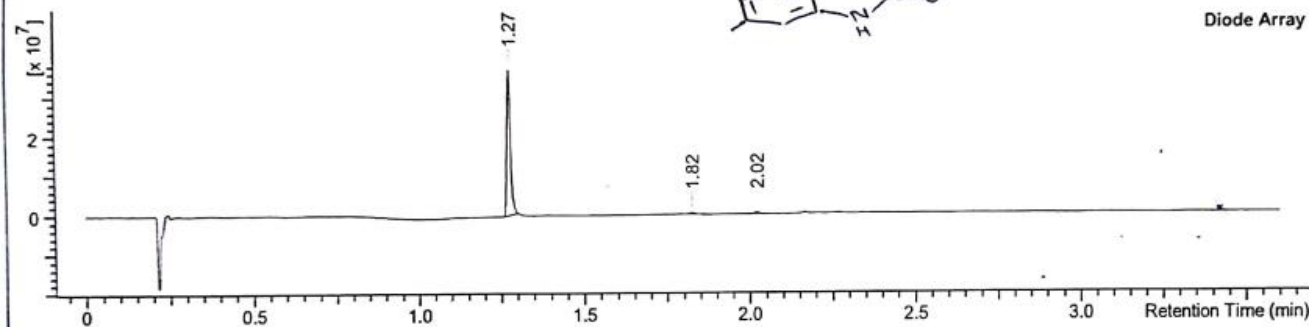

Sample ID C6292-011  
Acq Method LCMS\_FA\_4

Discovery Chemistry – Analytical Services

Instrument ID ANL-MCL3-LCMS-011  
Date of Analysis 15-Jul-2022 17:43:43

1:E,1  
022207B4793

Retention Time: 1.307  
Ion Mode: ES+

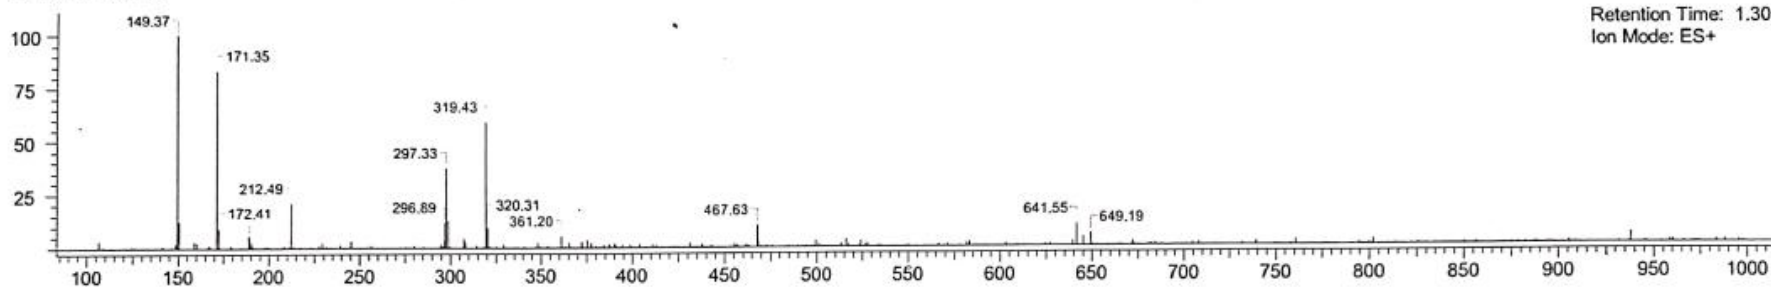

# <sup>1</sup>H NMR of 5-Methoxy-1,3-dihydro-2H-benzo[d]imidazol-2-one (2f)

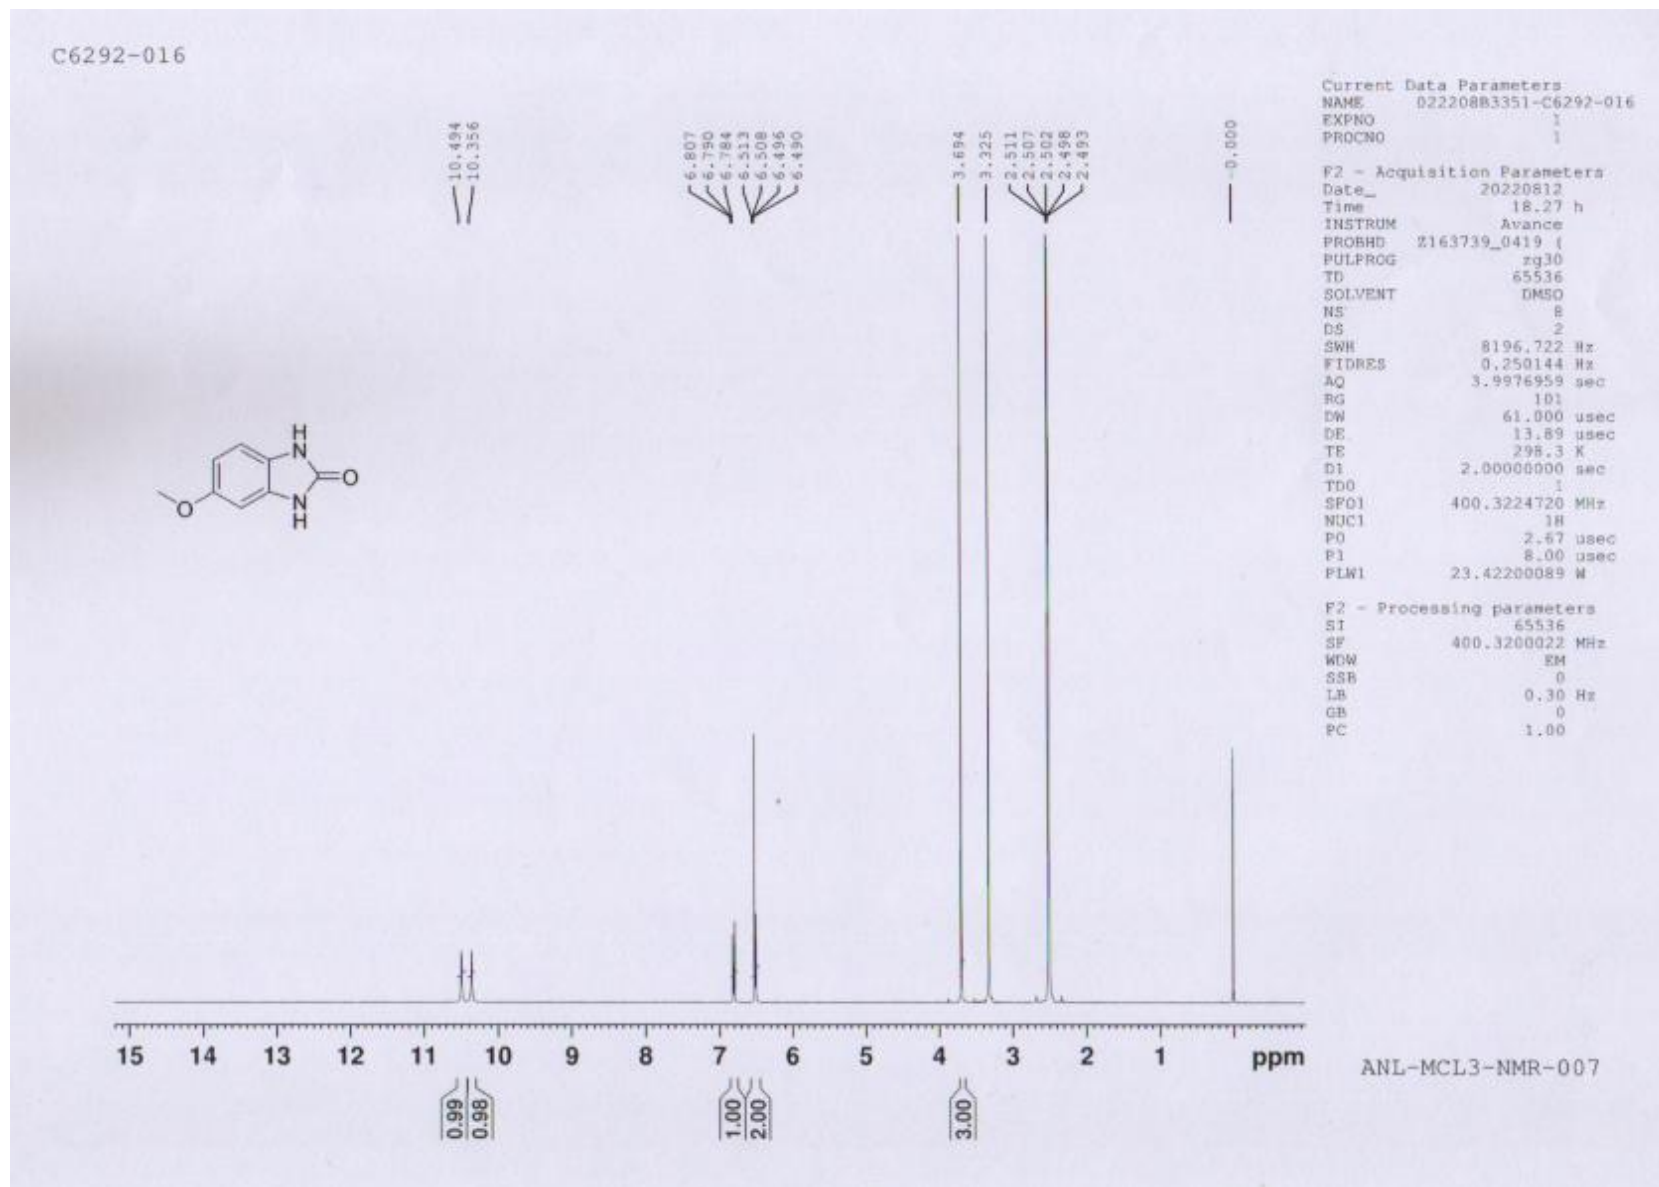

C6292-016

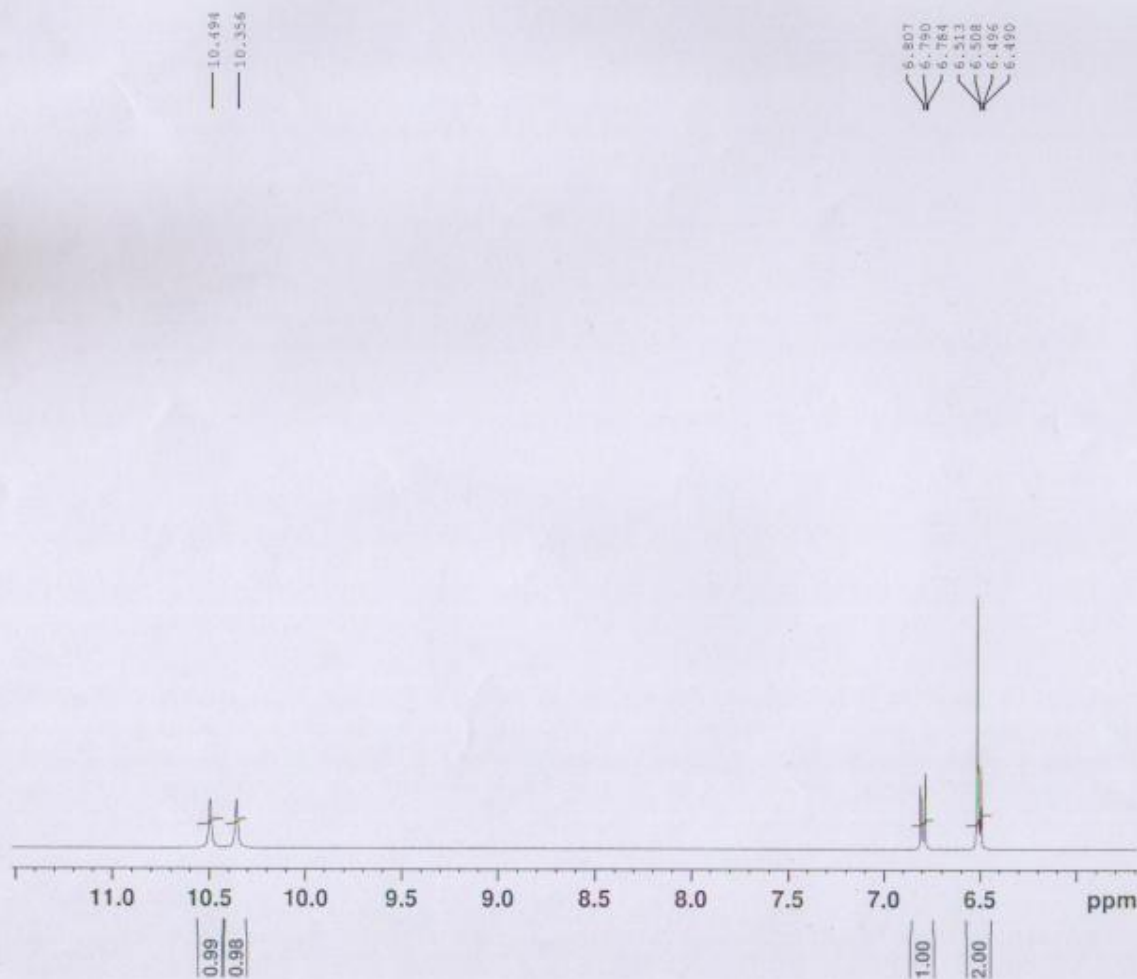

Current Data Parameters  
NAME 022208B3351-C6292-016  
EXPNO 1  
PROCNO 1

F2 - Acquisition Parameters  
Date\_ 20220812  
Time 18.27 h  
INSTRUM Avance  
PROBHD Z163739\_0419 1  
PULPROG zg30  
TD 65536  
SOLVENT DMSO  
NS 8  
DS 2  
SWH 8196.722 Hz  
FIDRES 0.250144 Hz  
AQ 3.9976959 sec  
RG 101  
CW 61.000 usec  
DE 13.89 usec  
TE 298.3 K  
D1 2.0000000 sec  
TDO 1  
SFO1 400.3224720 MHz  
NUC1 1H  
PO 2.67 usec  
P1 8.00 usec  
PLW1 23.42200089 W

F2 - Processing parameters  
SI 65536  
SF 400.3200022 MHz  
WDW EM  
SSB 0  
LB 0.30 Hz  
GB 0  
PC 1.00

ANL-MCL3-NMR-007



# 13C NMR of 5-Methoxy-1,3-dihydro-2H-benzo[d]imidazol-2-one (2f)

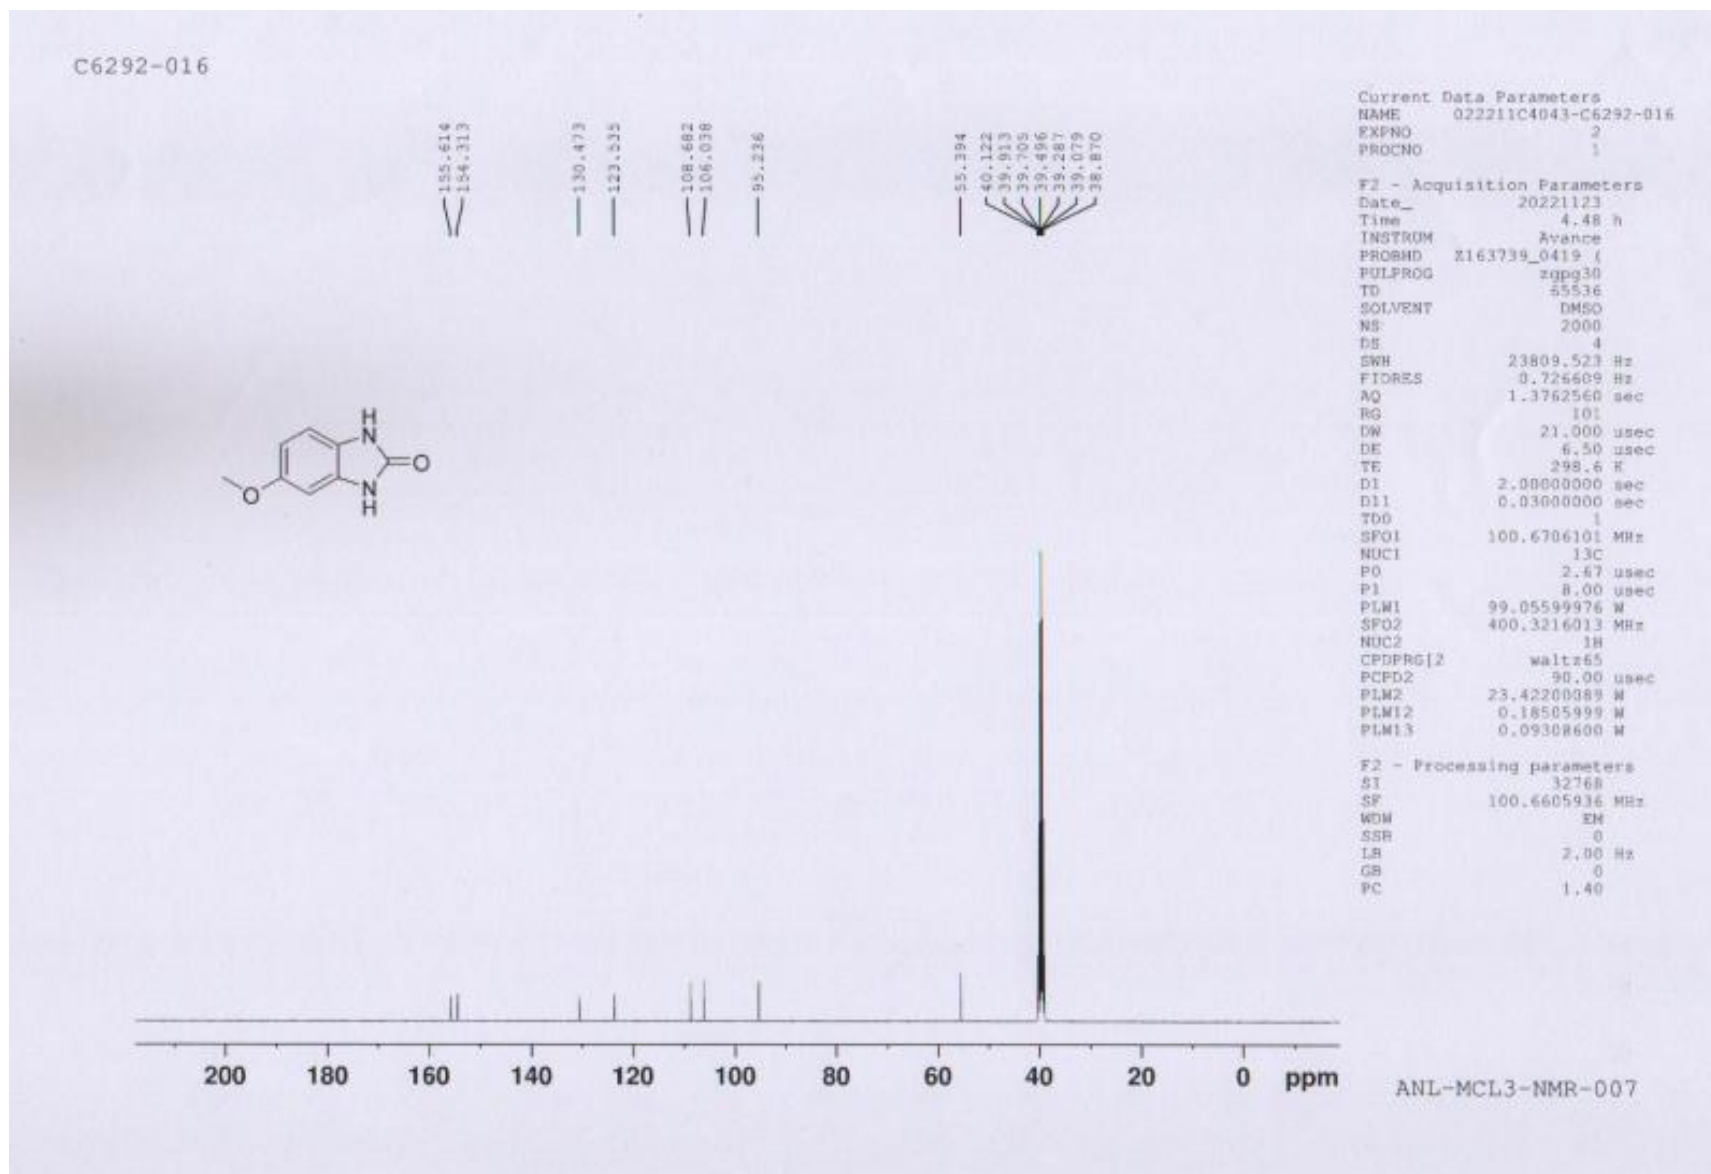

C6292-016

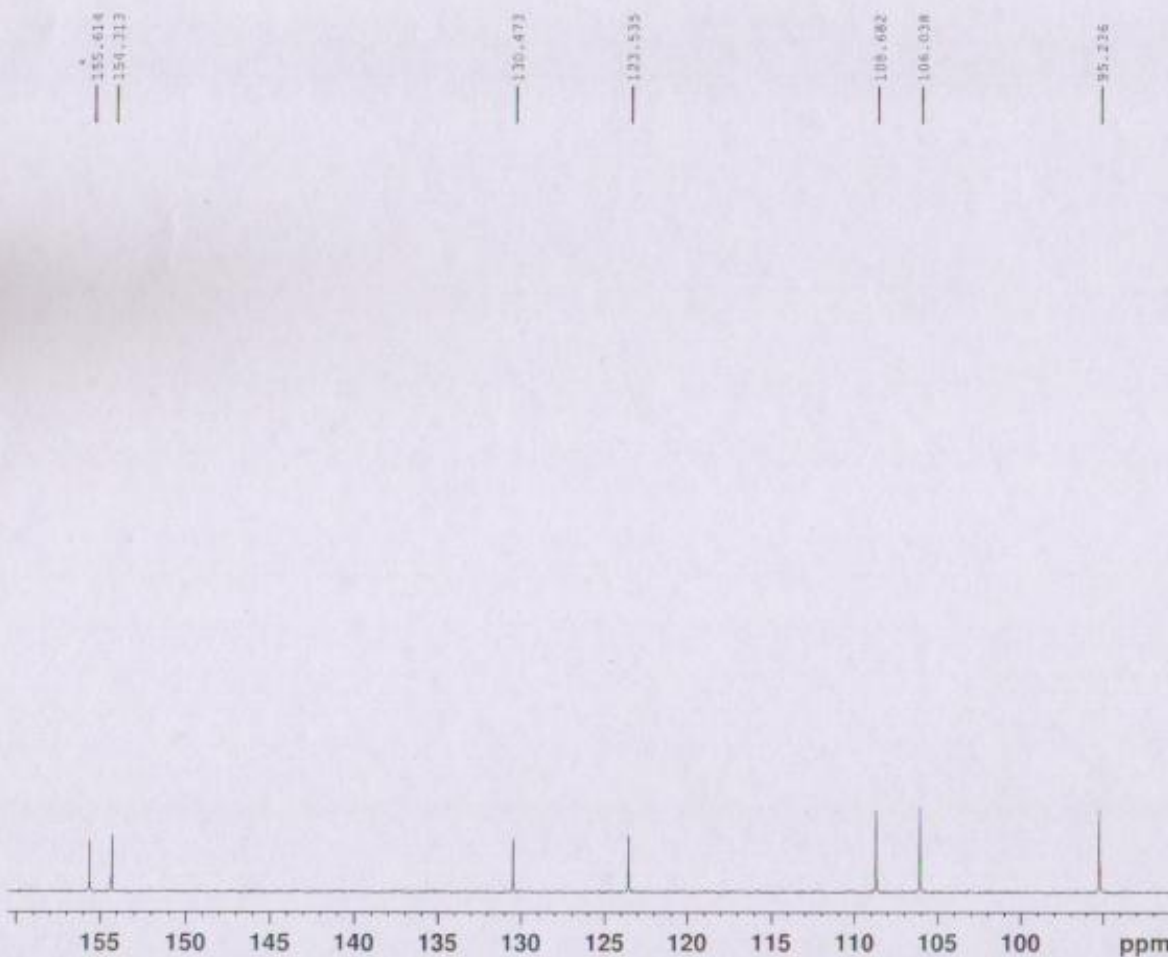

Current Data Parameters  
NAME 022211C4043-C6292-016  
EXPNO 2  
PROCNO 1

F2 - Acquisition Parameters  
Date\_ 20221123  
Time 4.48 h  
INSTRUM Avance  
PROBHD Z163739\_0419 1  
PULPROG zgpg30  
TD 65536  
SOLVENT DMSO  
NS 2000  
DS 4  
SWH 23809.523 Hz  
FIDRES 0.726609 Hz  
AQ 1.3762560 sec  
RG 101  
DM 21.000 usec  
DE 6.50 usec  
TE 298.6 K  
D1 2.0000000 sec  
D11 0.0300000 sec  
TD0 1  
SFO1 100.6706101 MHz  
NUC1 13C  
P0 2.67 usec  
P1 8.00 usec  
PLW1 99.05599976 W  
SFO2 400.3216013 MHz  
NUC2 1H  
CPDPRG12 waltz65  
PCPD2 90.00 usec  
PLW2 23.42200089 W  
PLW12 0.10505999 W  
PLW13 0.09308660 W

F2 - Processing parameters  
SI 32768  
SF 100.6605936 MHz  
WDW EM  
SSB 0  
LB 2.00 Hz  
GB 0  
PC 1.40

ANL-MCL3-NMR-007

# LCMS of 5-Methoxy-1,3-dihydro-2H-benzo[d]imidazol-2-one (2f)

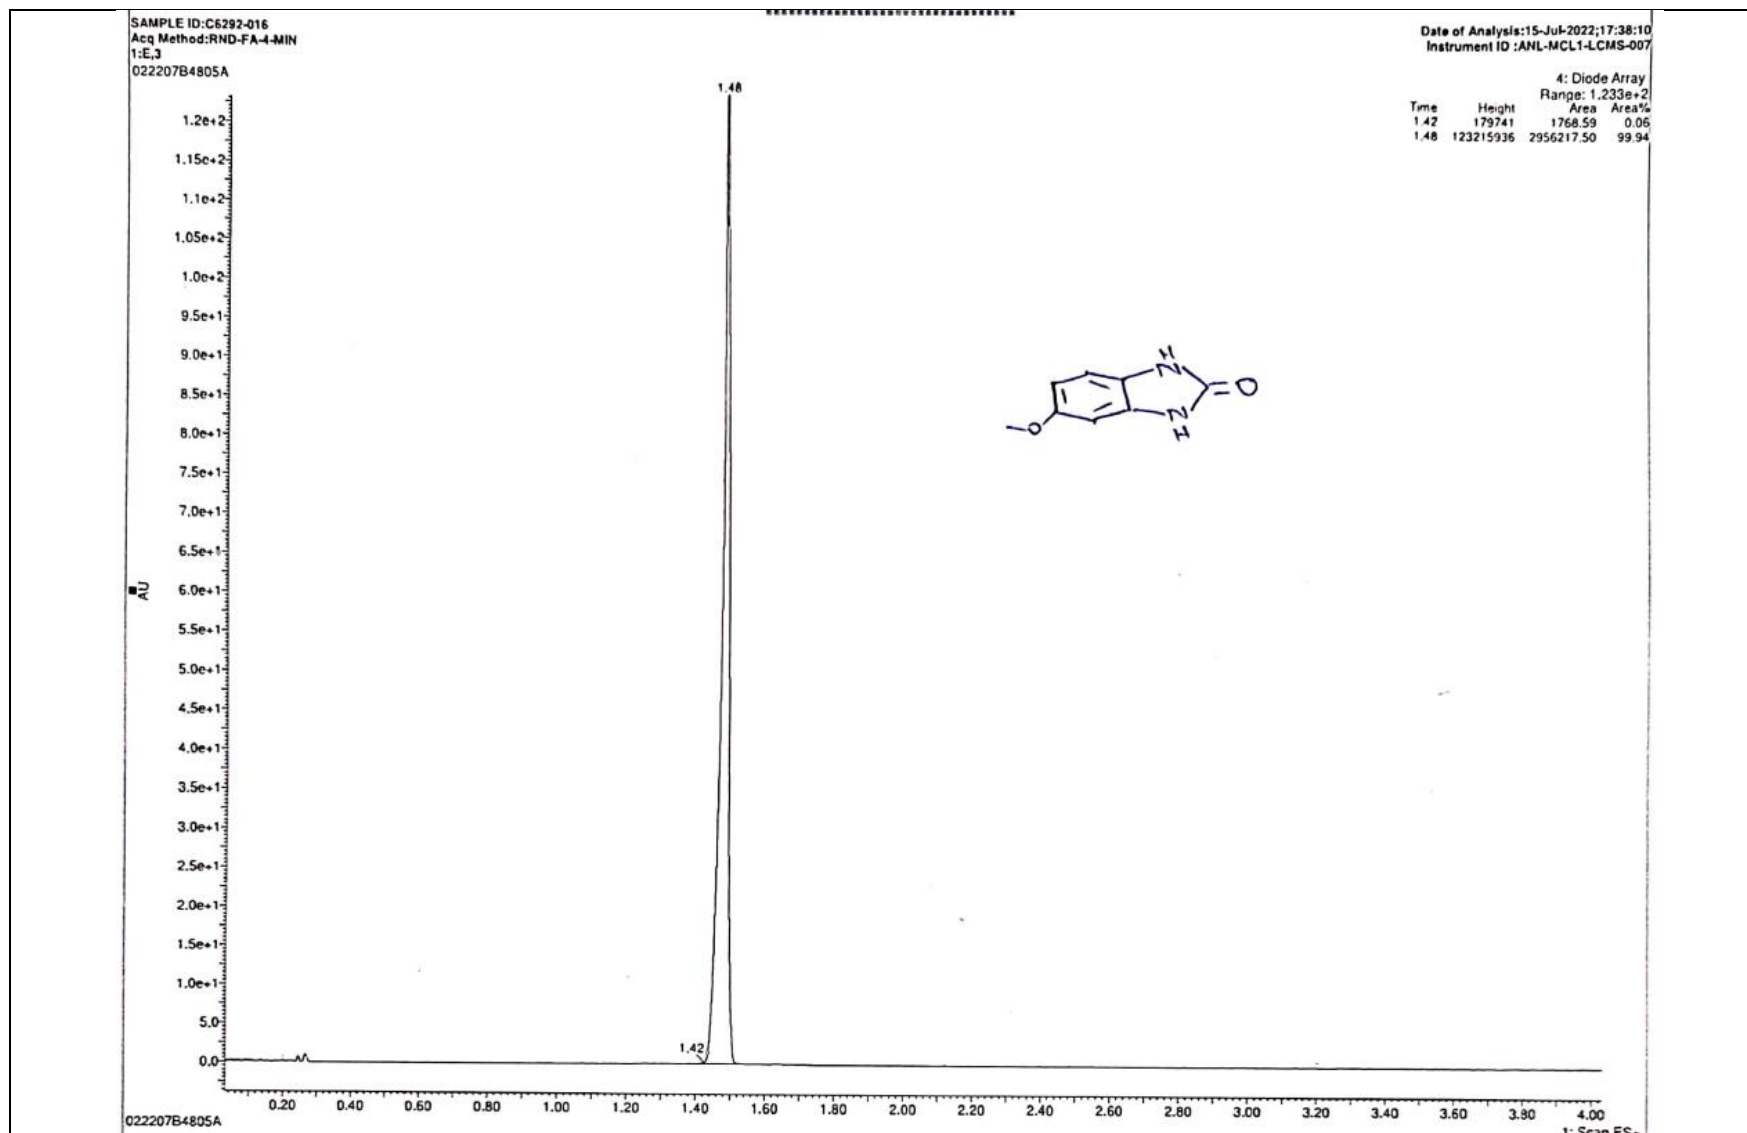

SAMPLE ID: 62327-016  
Acq Method: JMW-P1-A1-1N  
10/22/2016 05:58:11 (GMT)  
163.26

Date of Analysis: 16-10-2016 05:58:11  
Instrument ID: JMW-P1-A1-1N

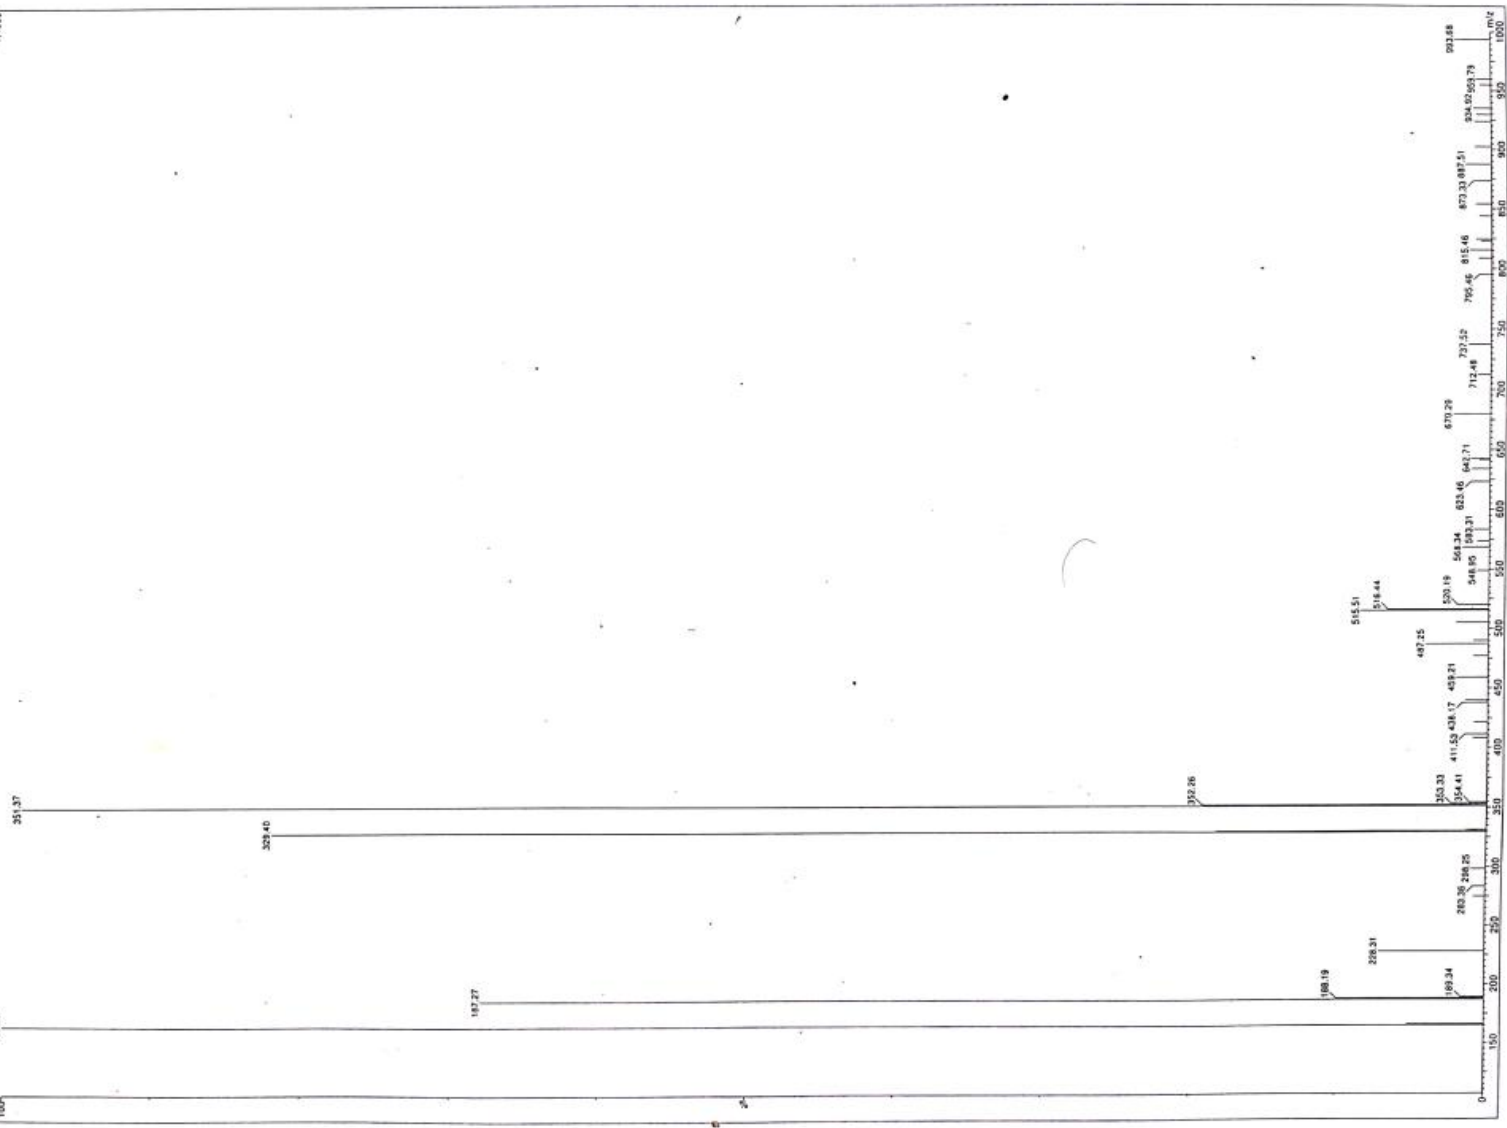

# <sup>1</sup>H NMR of 2-Oxo-2,3-dihydro-1H-benzo[d]imidazole-5-carbonitrile (2g)

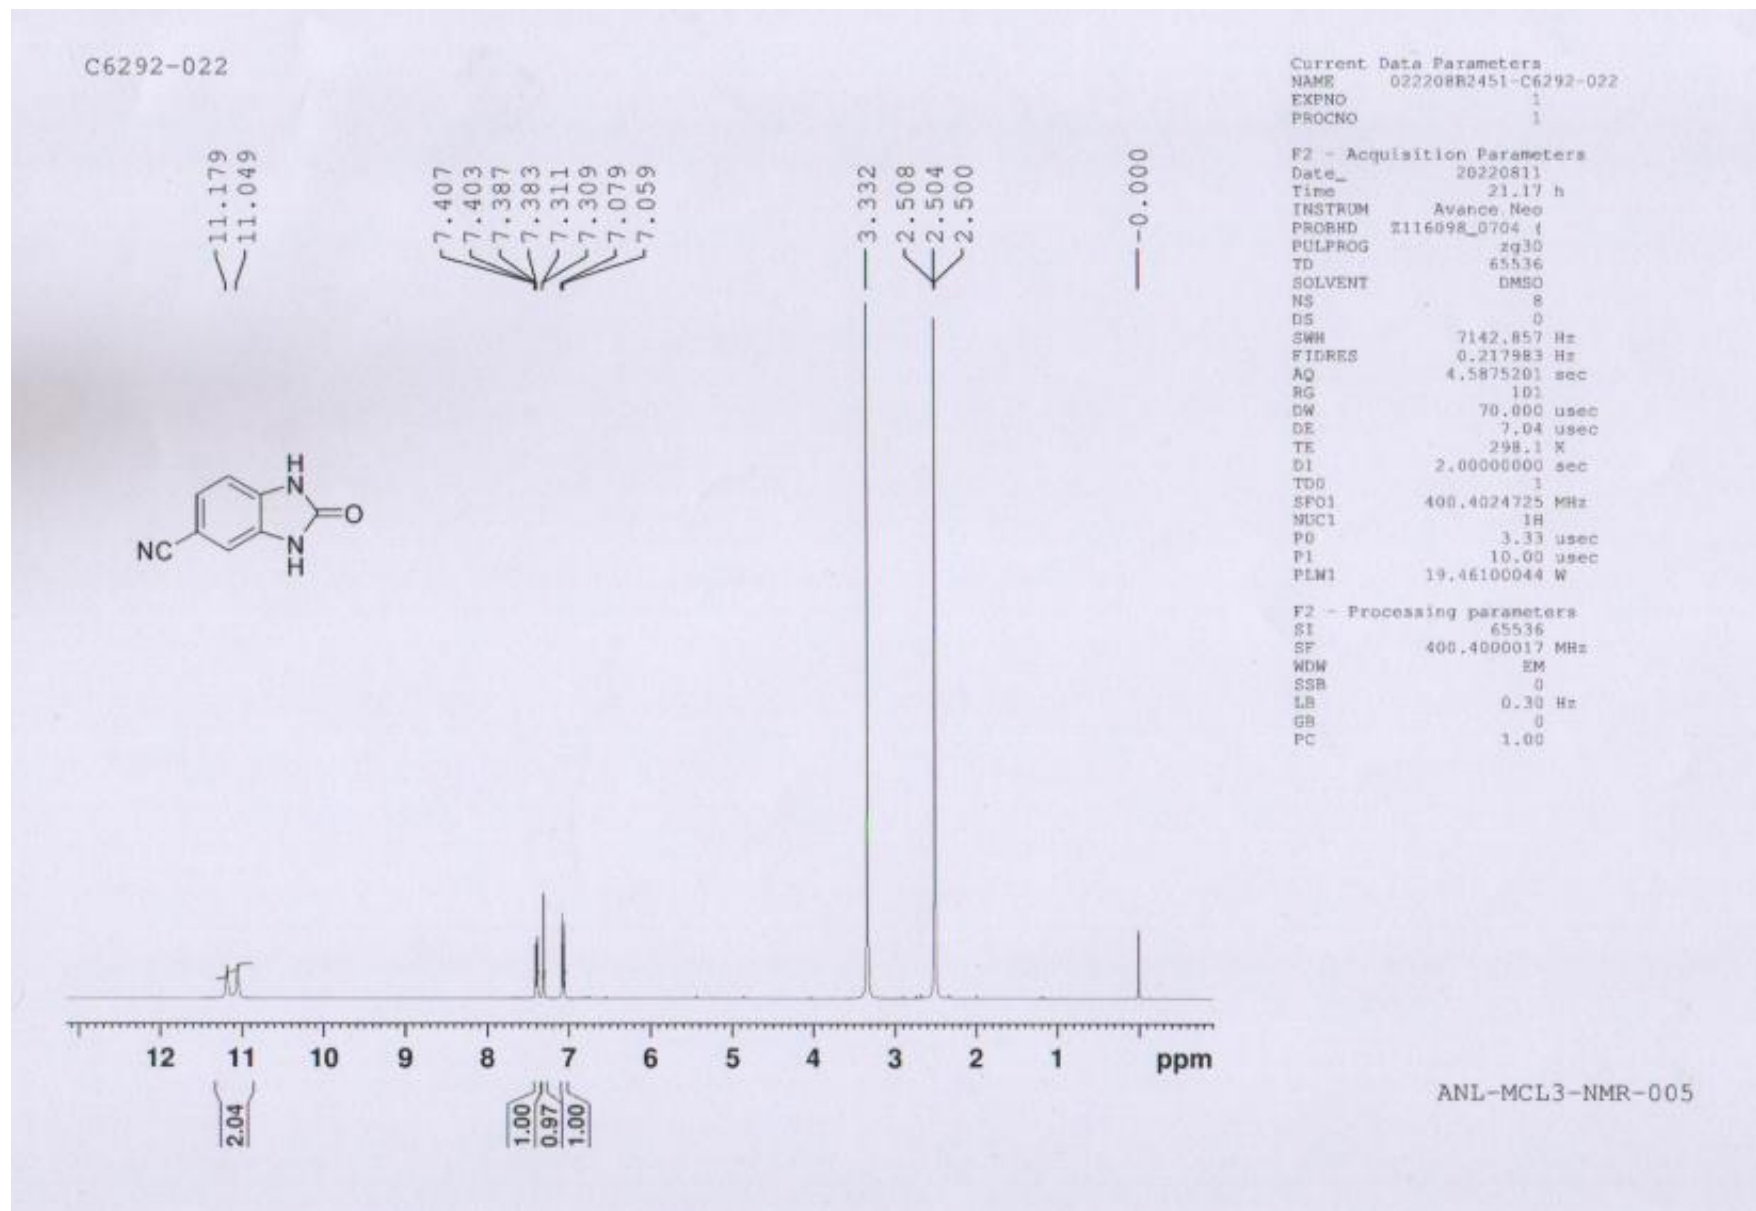

C6292-022

7.407  
7.403  
7.387  
7.383  
7.311  
7.309

7.079  
7.059

Current Data Parameters  
NAME 022208B2451-C6292-022  
EXPNO 1  
PROCNO 1

F2 - Acquisition Parameters  
Date\_ 20220811  
Time 21.17 h  
INSTRUM Avance Neo  
PROBHD B116095\_0704 (   
PULPROG zg30  
TD 65536  
SOLVENT DMSO  
NS 8  
DS 0  
SWH 7142.857 Hz  
FIDRES 0.217983 Hz  
AQ 4.5875201 sec  
RG 101  
DW 70.000 usec  
DE 7.04 usec  
TE 298.1 K  
D1 2.00000000 sec  
TDO 1  
SFO1 400.4024725 MHz  
NUC1 1H  
PC 3.33 usec  
F1 10.00 usec  
PLW1 19.46100044 W

F2 - Processing parameters  
SI 65536  
SF 400.4000017 MHz  
WDW EM  
SSB 0  
LB 0.30 Hz  
GB 0  
PC 1.00

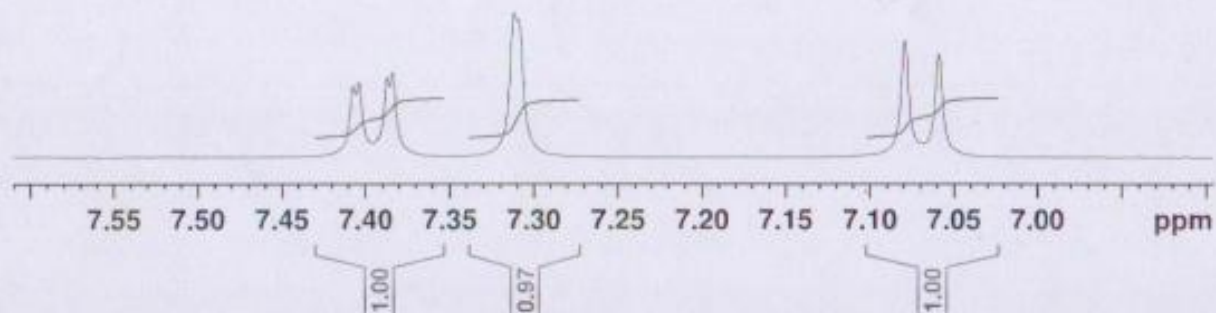

ANL-MCL3-NMR-005

# <sup>13</sup>C NMR of 2-Oxo-2,3-dihydro-1H-benzo[d]imidazole-5-carbonitrile (2g)

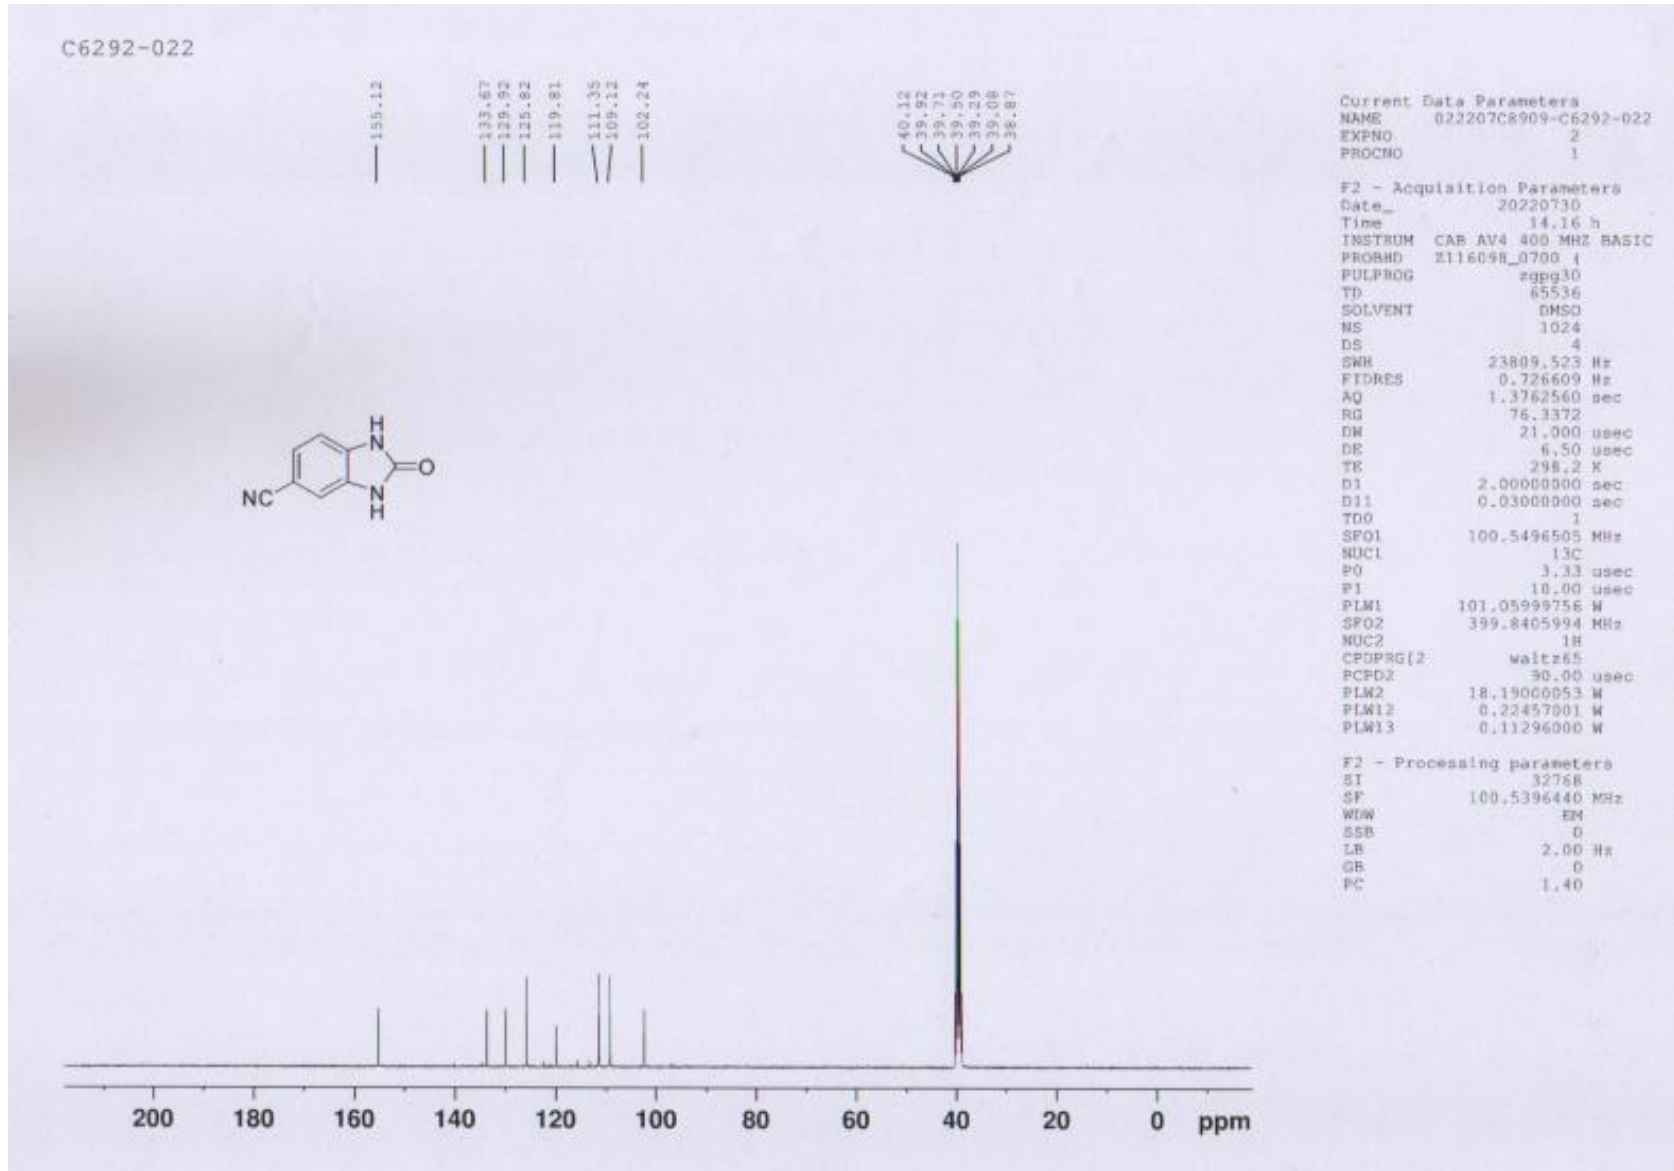

C6292-022

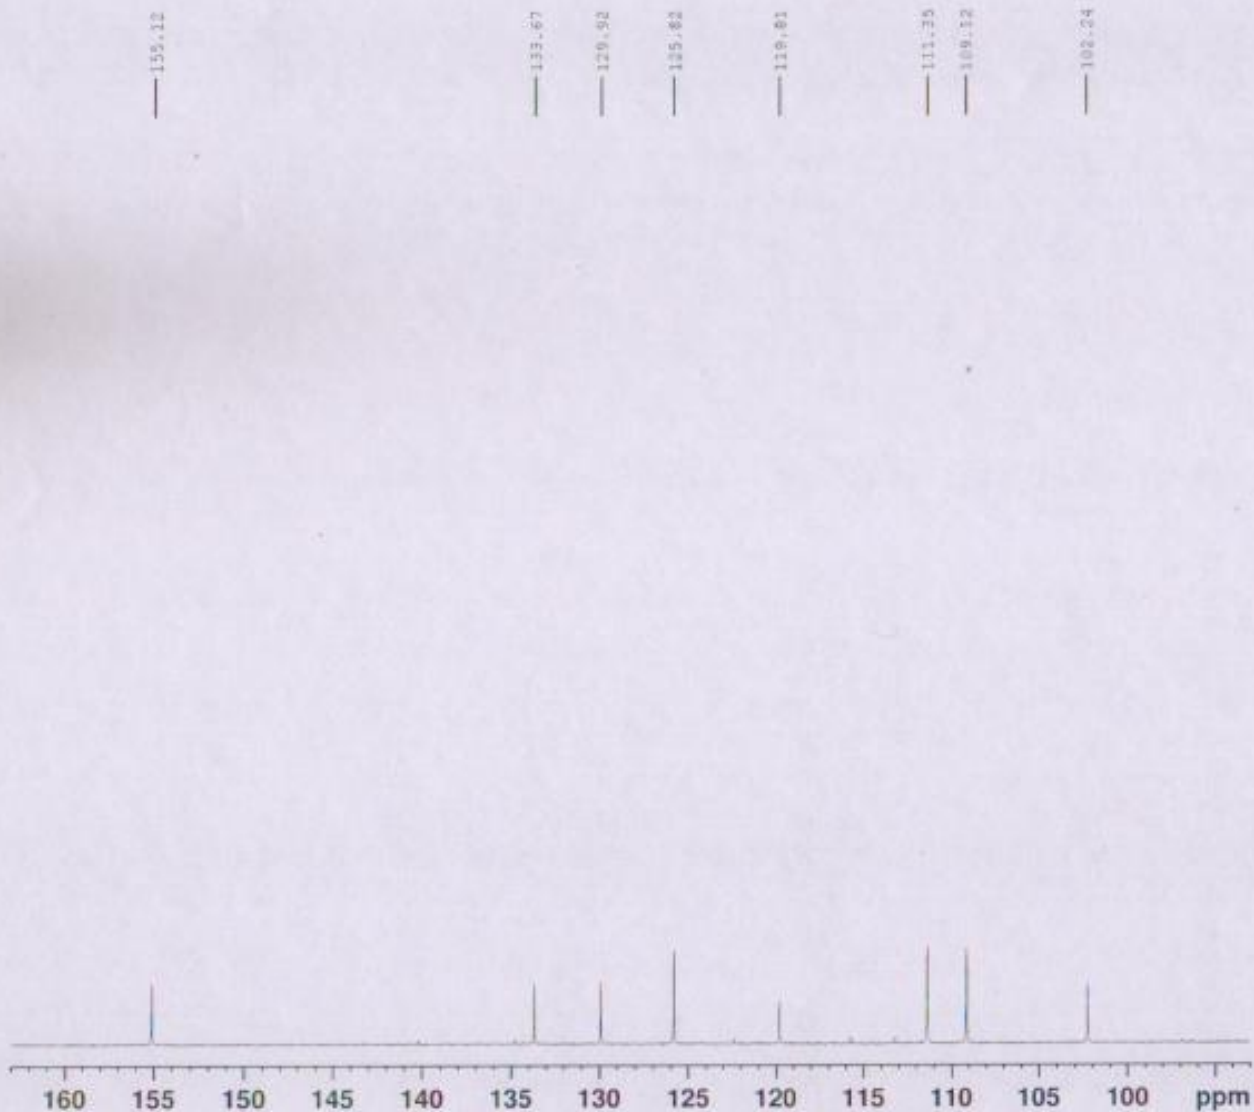

Current Data Parameters  
NAME 822207C8909-C6292-022  
EXPNO 2  
PROCNO 1

F2 - Acquisition Parameters  
Date\_ 20220730  
Time 14.16 h  
INSTRUM CAS AV4 400 MHZ BASIC  
PROBHD Z116098\_0700 4  
PULPROG zgpg30  
TD 65536  
SOLVENT DMSO  
NS 1024  
DS 4  
SWH 23809.523 Hz  
FIDRES 0.726609 Hz  
AQ 1.3762560 sec  
RG 76.3372  
DW 21.000 usec  
DE 6.50 usec  
TE 298.2 K  
D1 2.00000000 sec  
D11 0.03000000 sec  
TD0 1  
SFO1 100.5496505 MHz  
NUC1 13C  
P0 3.33 usec  
P1 10.00 usec  
PLW1 101.05999756 W  
SFO2 399.8405994 MHz  
NUC2 1H  
CPDPRG2 waltz65  
PCPD2 90.00 usec  
PLW2 18.19000053 W  
PLW12 0.22457001 W  
PLW13 0.11296000 W

F2 - Processing parameters  
SI 32768  
SF 100.5396440 MHz  
WDW EM  
SSB 0  
LB 2.00 Hz  
GB 0  
PC 1.40



# LCMS of 2-Oxo-2,3-dihydro-1H-benzo[d]imidazole-5-carbonitrile (2g)

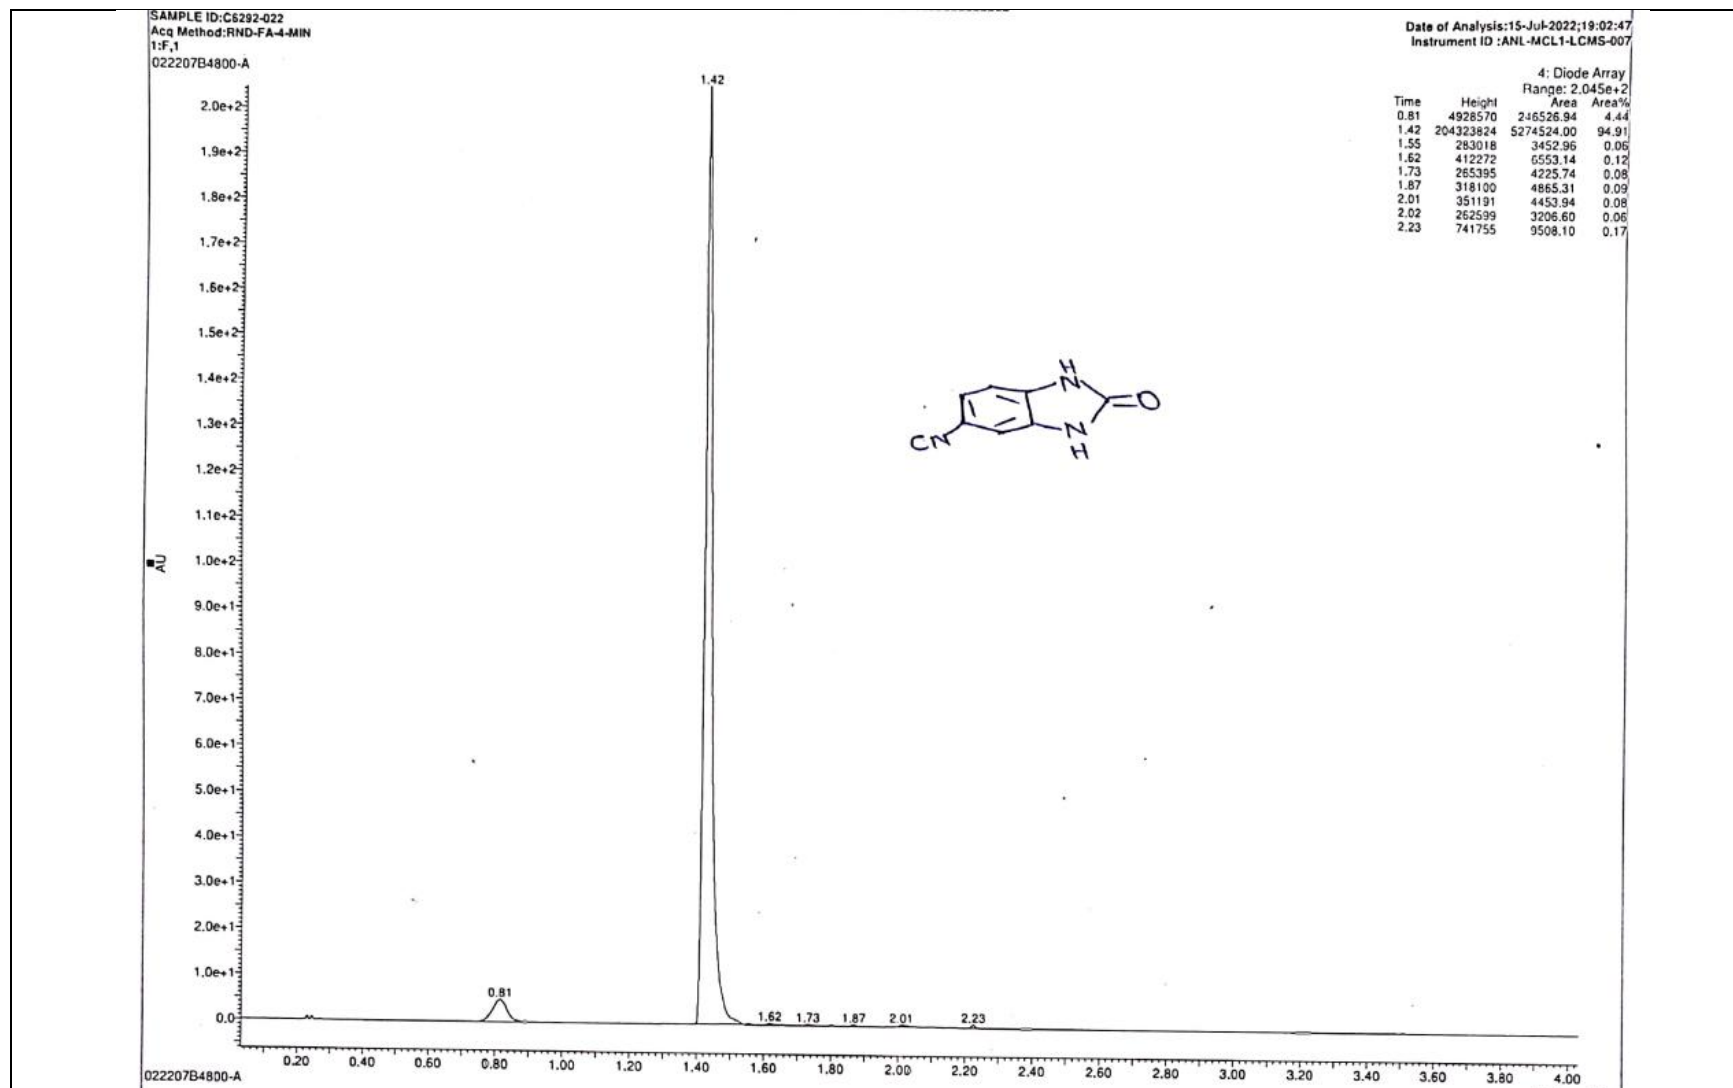

SAMPLE ID :C6292-022  
Acq Method :RND-FA-4-MIN  
1:F,1  
022207B4800-A 56 (1.431)

Date of Analysis:15-Jul-2022:19:02:47  
Instrument ID :ANL-MCL1-LCMS-007

1: Scan ES+  
9.01e5

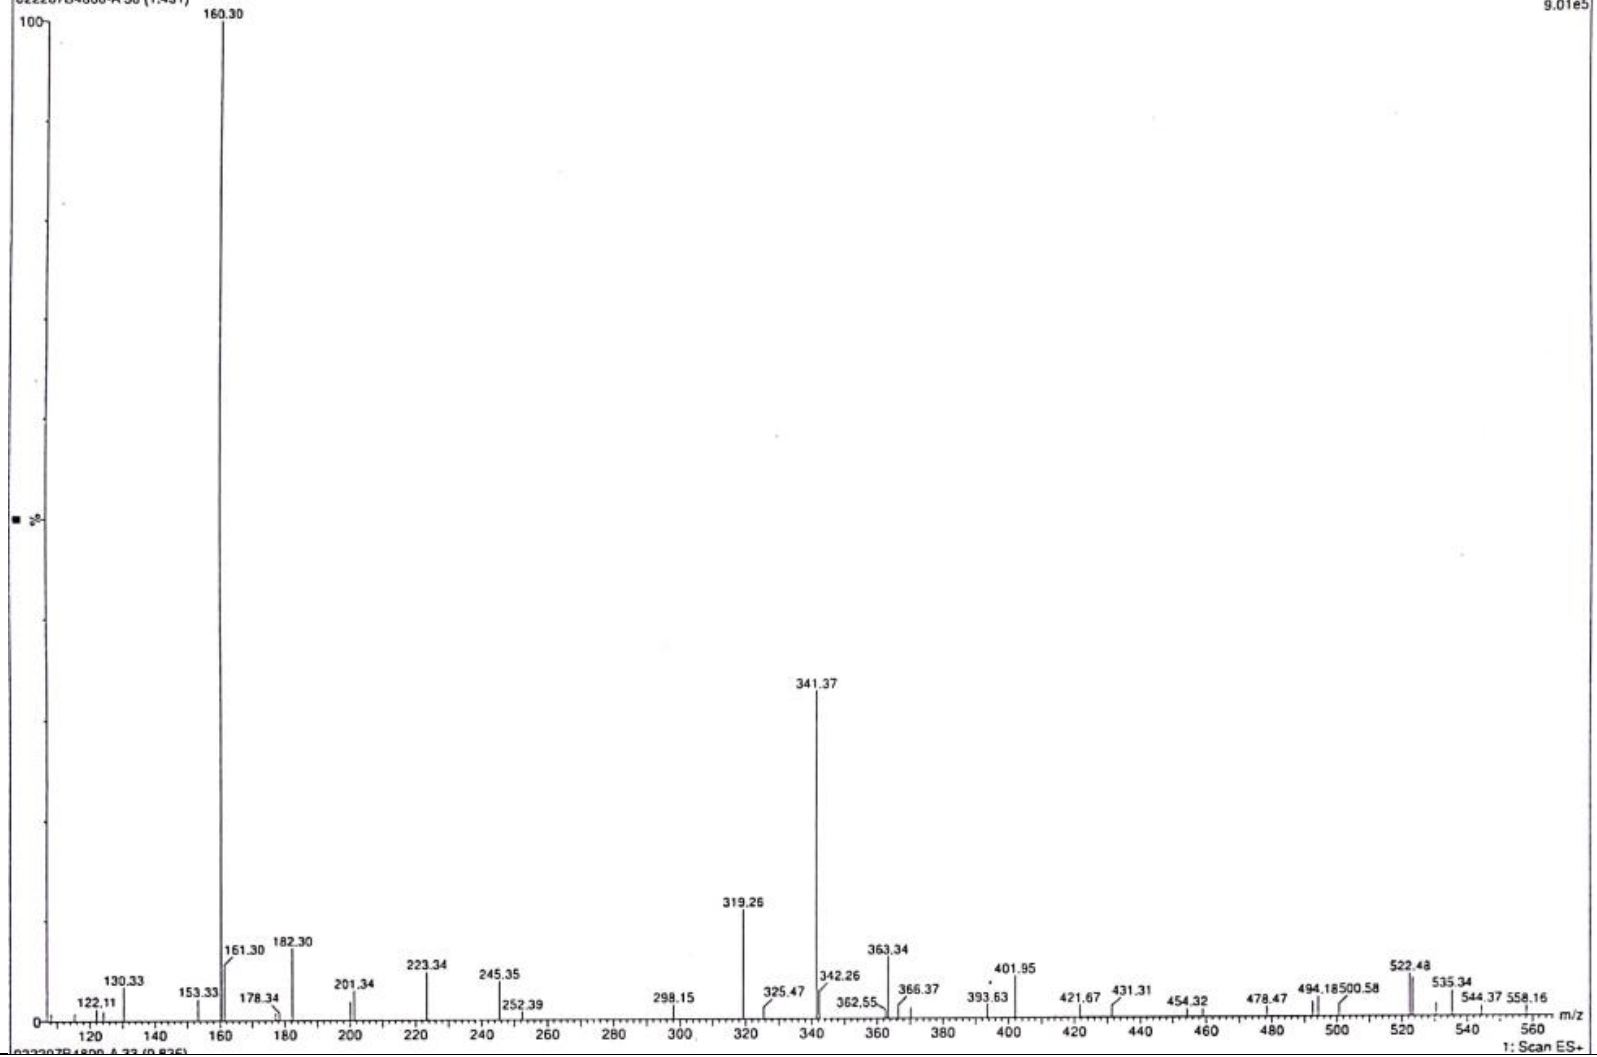

# <sup>1</sup>H NMR of 5-(Trifluoromethyl)-1,3-dihydro-2H-benzo[d]imidazol-2-one (2h)

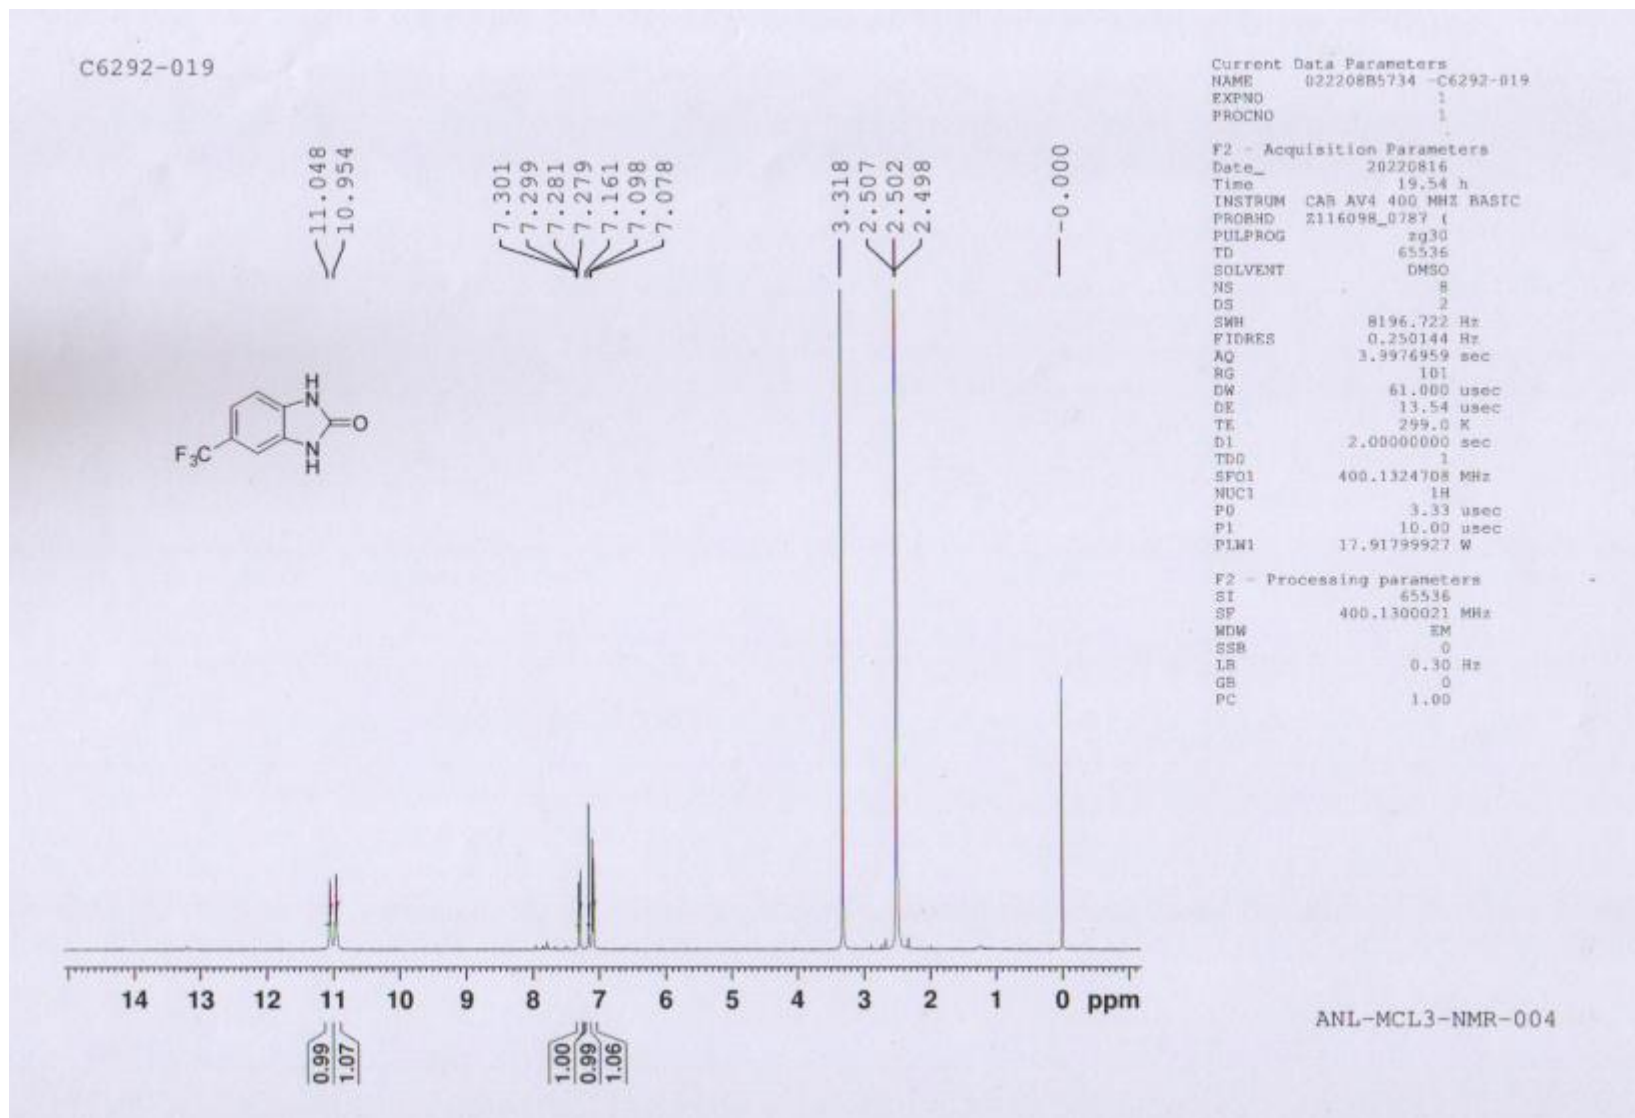

C6292-019

7.301  
7.299  
7.281  
7.279  
7.161  
7.098  
7.078

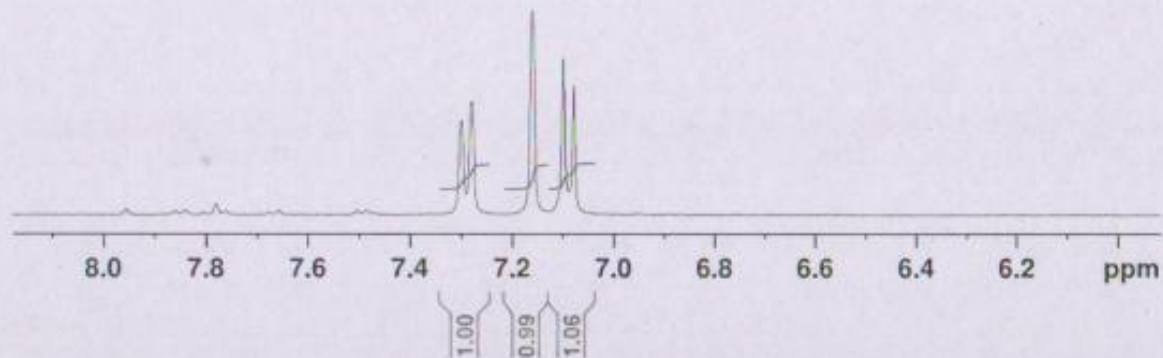

Current Data Parameters  
NAME 022208B5734 -C6292-019  
EXFNO 1  
PROCNO 1

F2 - Acquisition Parameters  
Date\_ 20220816  
Time 19.54 h  
INSTRUM CAB AV4 400 MHz BASIC  
PROBHD Z116098\_0787 ( )  
PULPROG zg30  
TD 65536  
SOLVENT DMSO  
NS 8  
DS 2  
SWH 8196.722 Hz  
FIDRES 0.250144 Hz  
AQ 3.9976959 sec  
RG 101  
DW 61.000 usec  
DE 13.54 usec  
TE 299.0 K  
D1 2.00000000 sec  
TDD 1  
SFO1 400.1324708 MHz  
NUC1 1H  
P0 3.33 usec  
P1 10.00 usec  
PLW1 17.91799927 W

F2 - Processing parameters  
SI 65536  
SF 400.1300021 MHz  
WDW EM  
SSB 0  
LB 0.30 Hz  
GB 0  
PC 1.00

ANL-MCL3-NMR-004

# 13C NMR of 5-(Trifluoromethyl)-1,3-dihydro-2H-benzo[d]imidazol-2-one (2h)

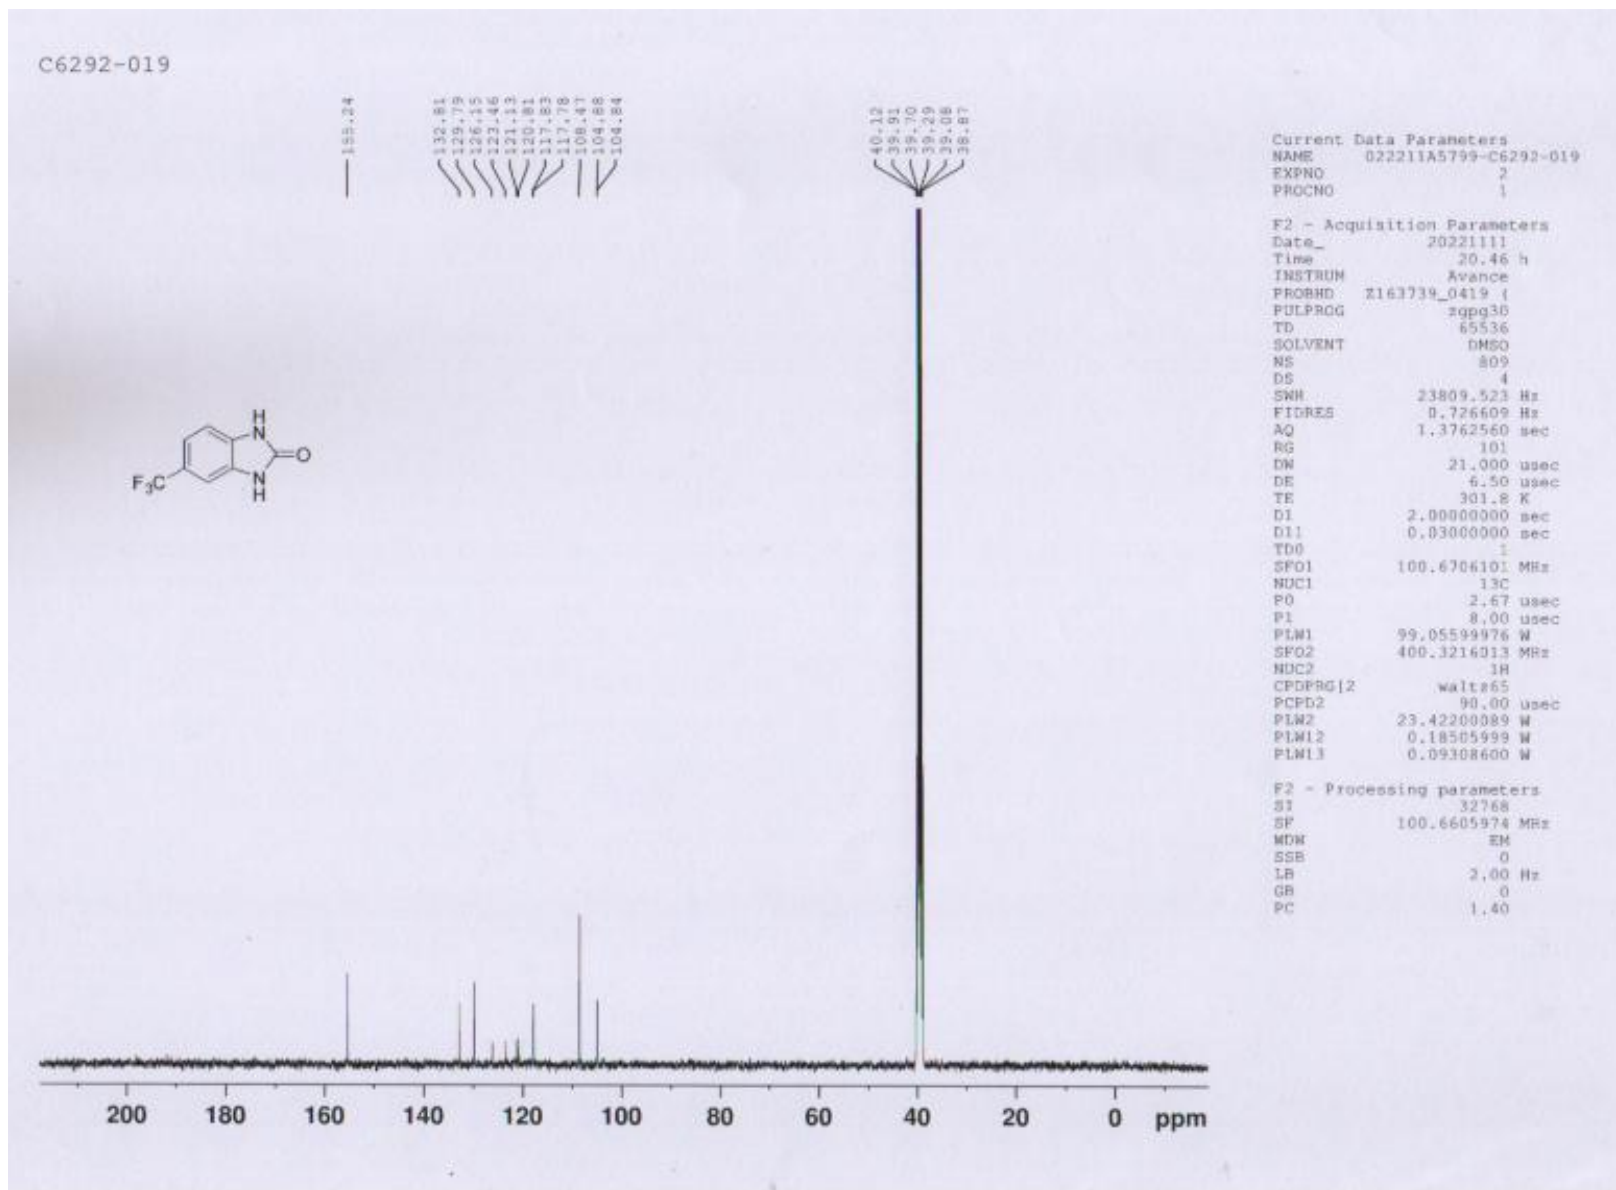

C6292-019

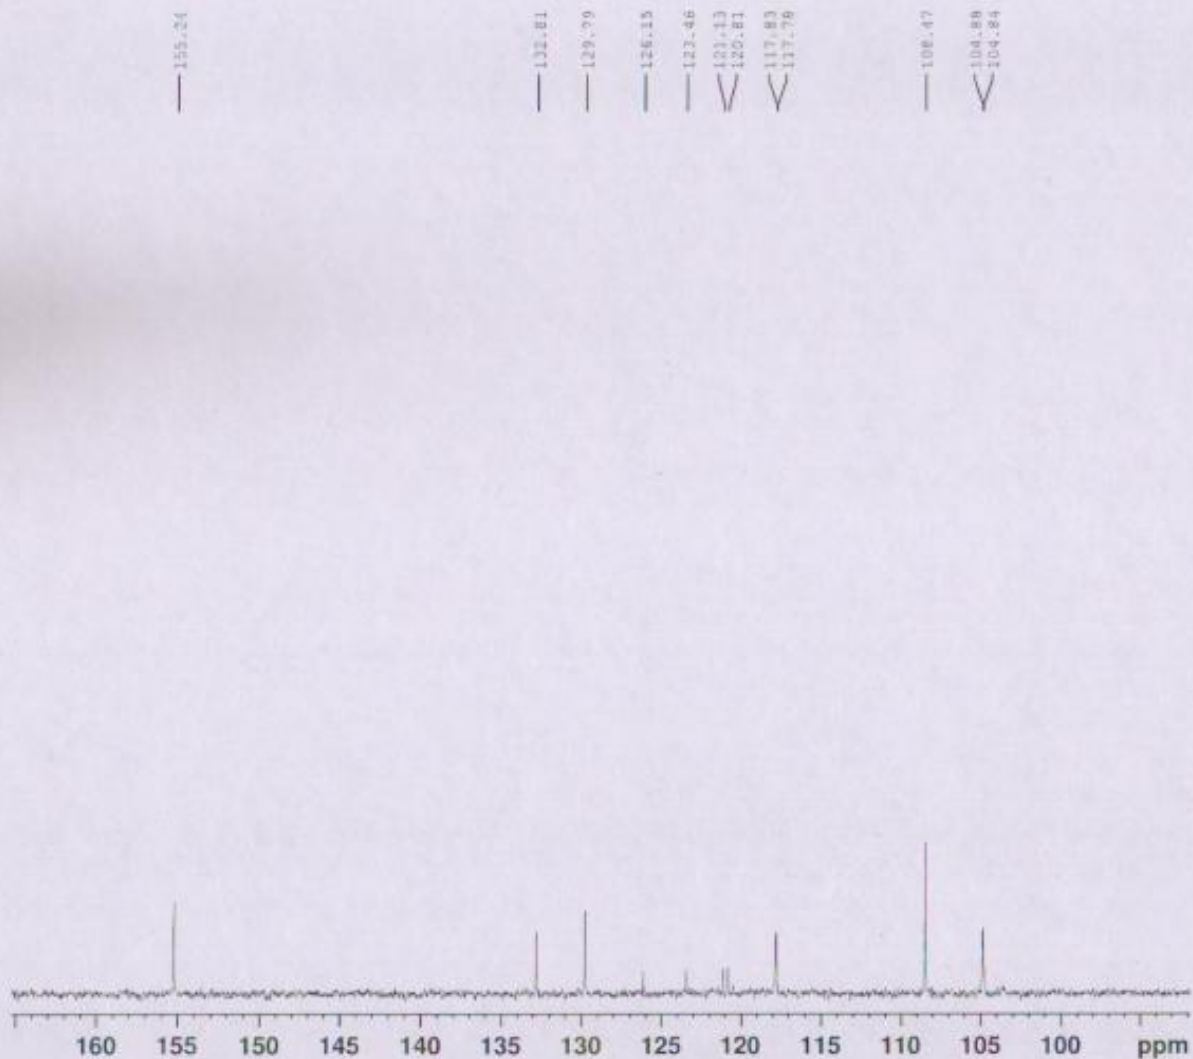

Current Data Parameters  
NAME 022211A1799-C6292-019  
EXPNO 2  
PROCNO 1

F2 - Acquisition Parameters  
Date\_ 20221111  
Time 20.46 h  
INSTRUM Avance  
PROBHD z163735\_0415 (1  
PULPROG zgpg30  
TD 65536  
SOLVENT DMSO  
NS 809  
DS 4  
SWH 23809.523 Hz  
FIDRES 0.724609 Hz  
AQ 1.3762560 sec  
RG 101  
DW 21.000 usec  
DE 6.50 usec  
TE 301.8 K  
D1 2.0000000 sec  
D11 0.0300000 sec  
TD0 1  
SFO1 100.6706101 MHz  
NUC1 13C  
P0 2.67 usec  
P1 8.00 usec  
PLW1 99.05599976 W  
SFO2 400.3216013 MHz  
NUC2 1H  
CPDPRG12 waltz65  
PCPD2 90.00 usec  
PLW2 23.42200089 W  
PLW12 0.18505999 W  
PLW13 0.09308600 W

F2 - Processing parameters  
SI 32768  
SF 100.6605974 MHz  
WDW EM  
SSB 0  
LB 3.00 Hz  
GB 0  
PC 1.40

# LCMS of 5-(Trifluoromethyl)-1,3-dihydro-2H-benzo[d]imidazol-2-one (2h)

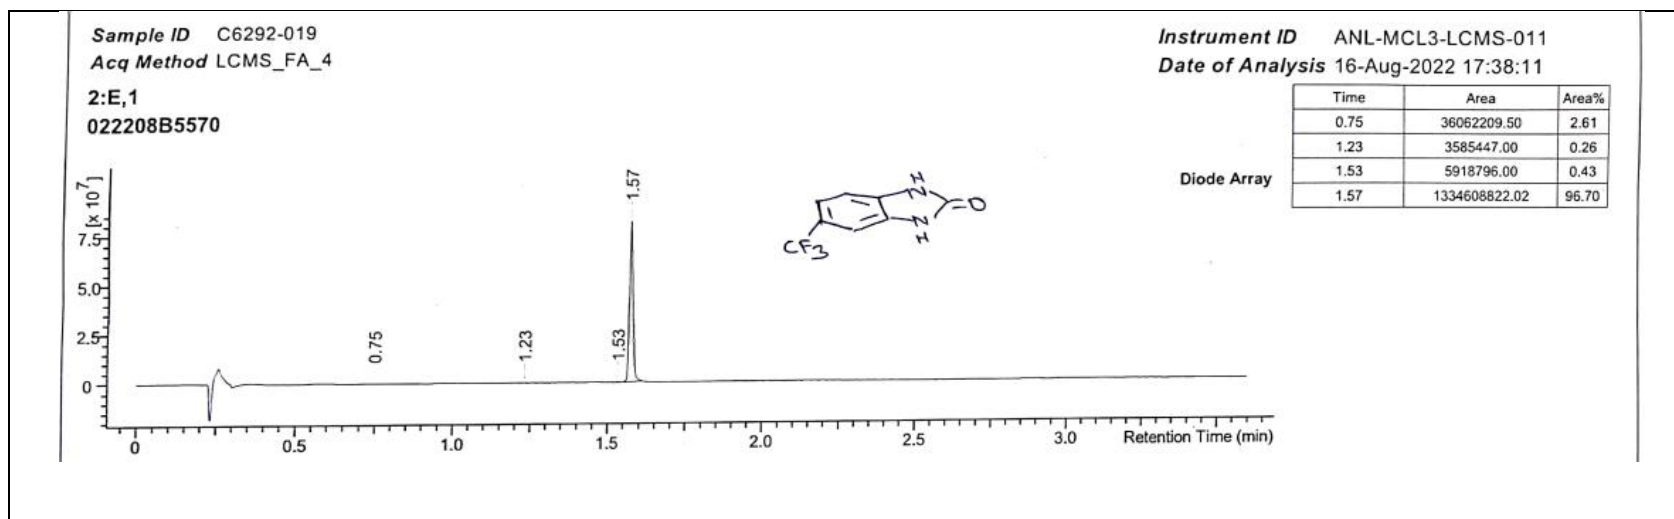

1cq Method LCMS\_FA\_4

1:E,1

J22208B5570

Instrument ID ANL-MCL3-LCMS-011

Date of Analysis 16-Aug-2022 17:38:11

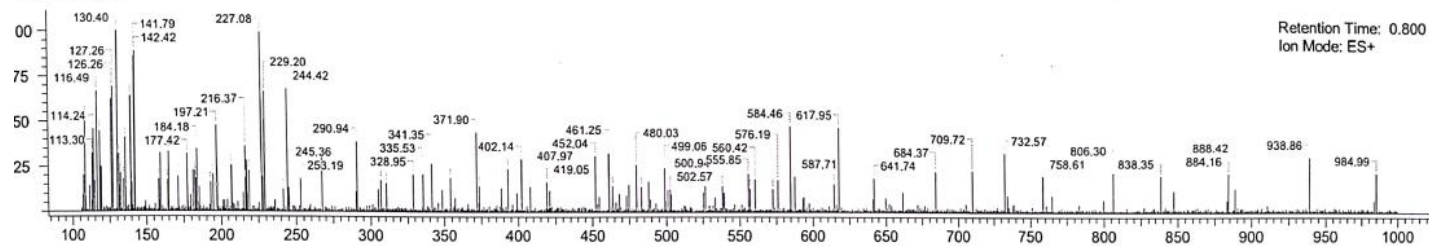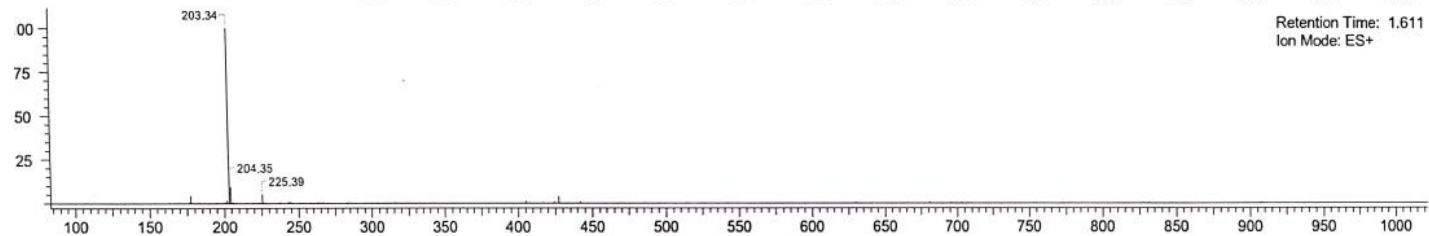



# <sup>1</sup>H NMR of 5-Nitro-1,3-dihydro-2H-benzo[d]imidazol-2-one (2i)

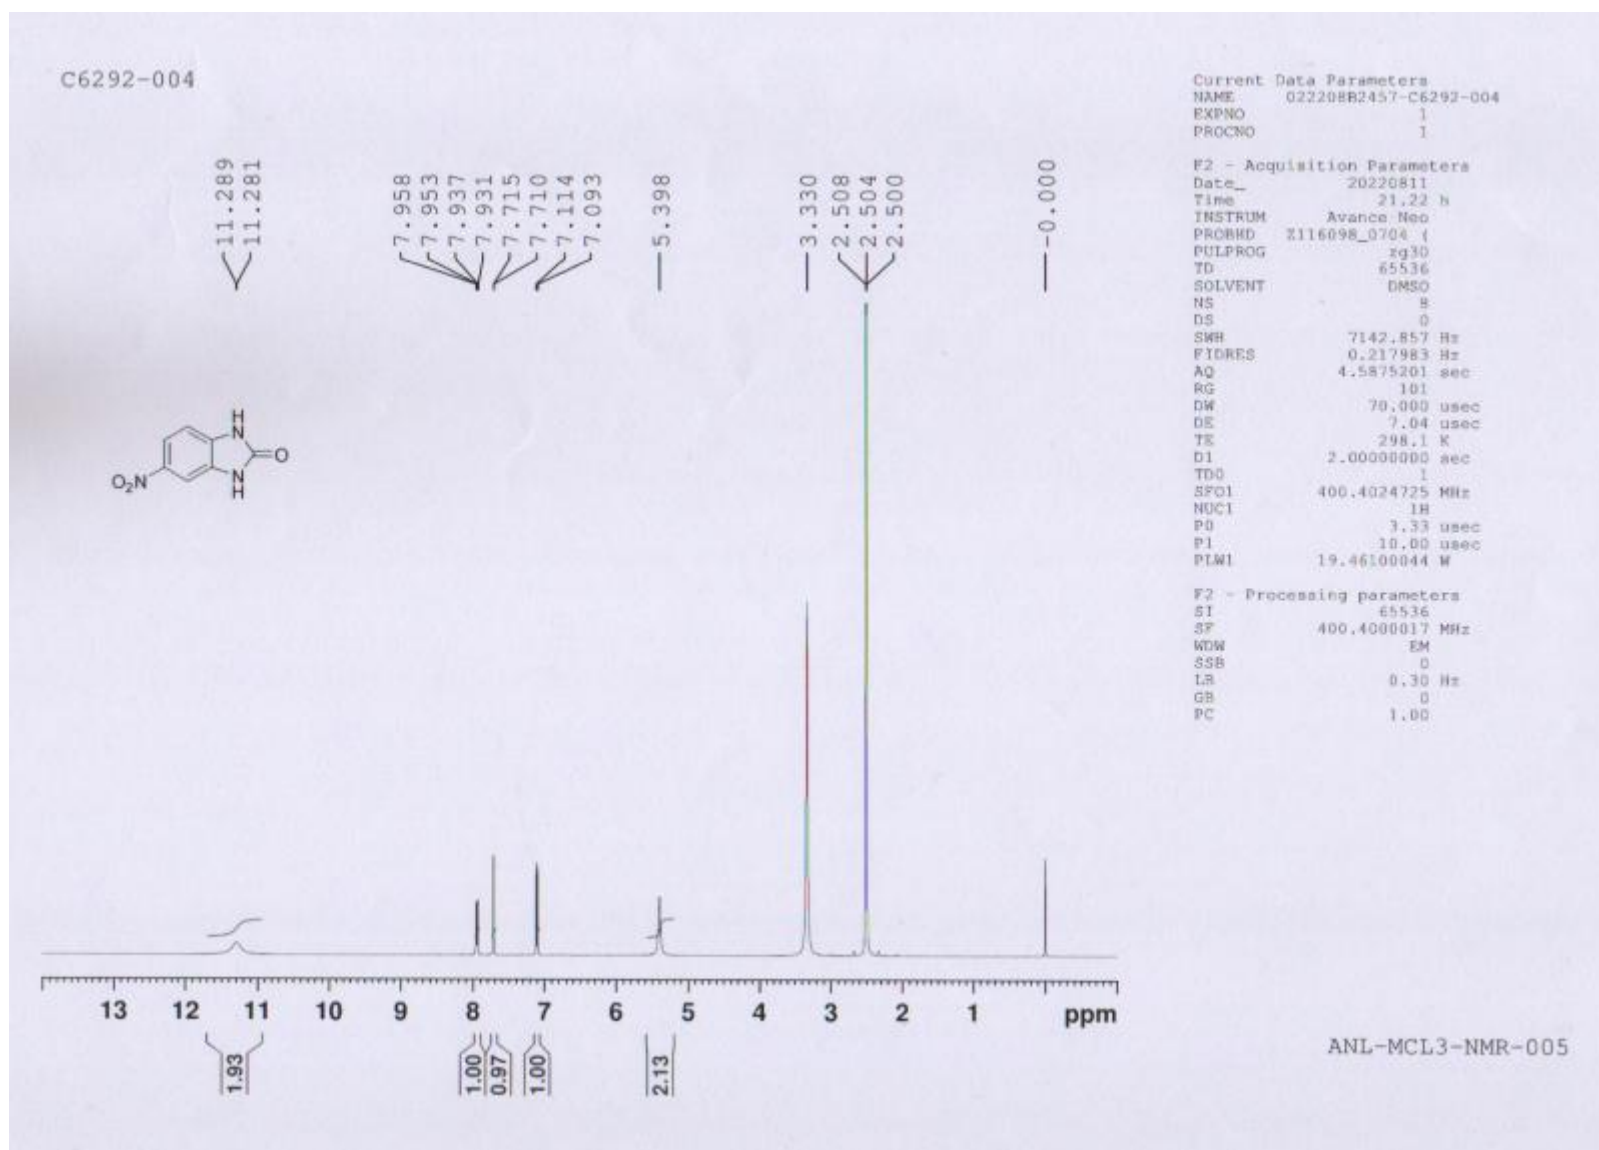

C6292-004

Current Data Parameters  
NAME 02220882457-C6292-004  
EXPMO 1  
PROCNO 1

F2 - Acquisition Parameters

Date\_ 20220811  
Time 21.22 h  
INSTRUM Avance Neo  
PROBHD 2116098\_0704 (4  
PULPROG zg30  
TD 65536  
SOLVENT DMSO  
NS 8  
DS 0  
SWH 7142.857 Hz  
FIDRES 0.217983 Hz  
AQ 4.5875201 sec  
RG 101  
DW 70.000 usec  
DE 7.04 usec  
TE 298.1 K  
D1 2.00000000 sec  
TDO 1  
SFO1 400.4024725 MHz  
NUC1 1H  
P0 3.33 usec  
P1 10.00 usec  
PLW1 19.46100044 W

F2 - Processing parameters

SI 65536  
SF 400.4000017 MHz  
WDW EM  
SSB 0  
LB 0.30 Hz  
GB 0  
PC 1.00

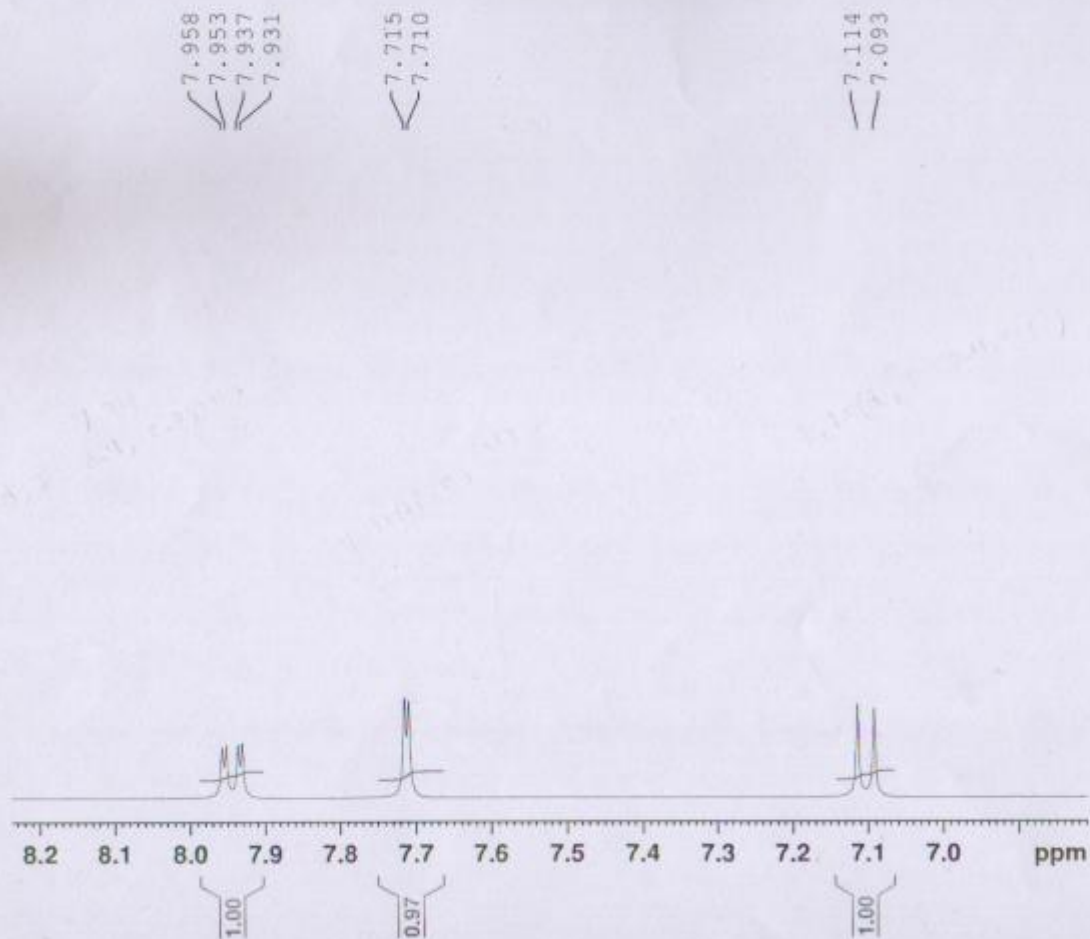

ANL-MCL3-NMR-005

# 13C NMR of 5-Nitro-1,3-dihydro-2H-benzo[d]imidazol-2-one (2i)

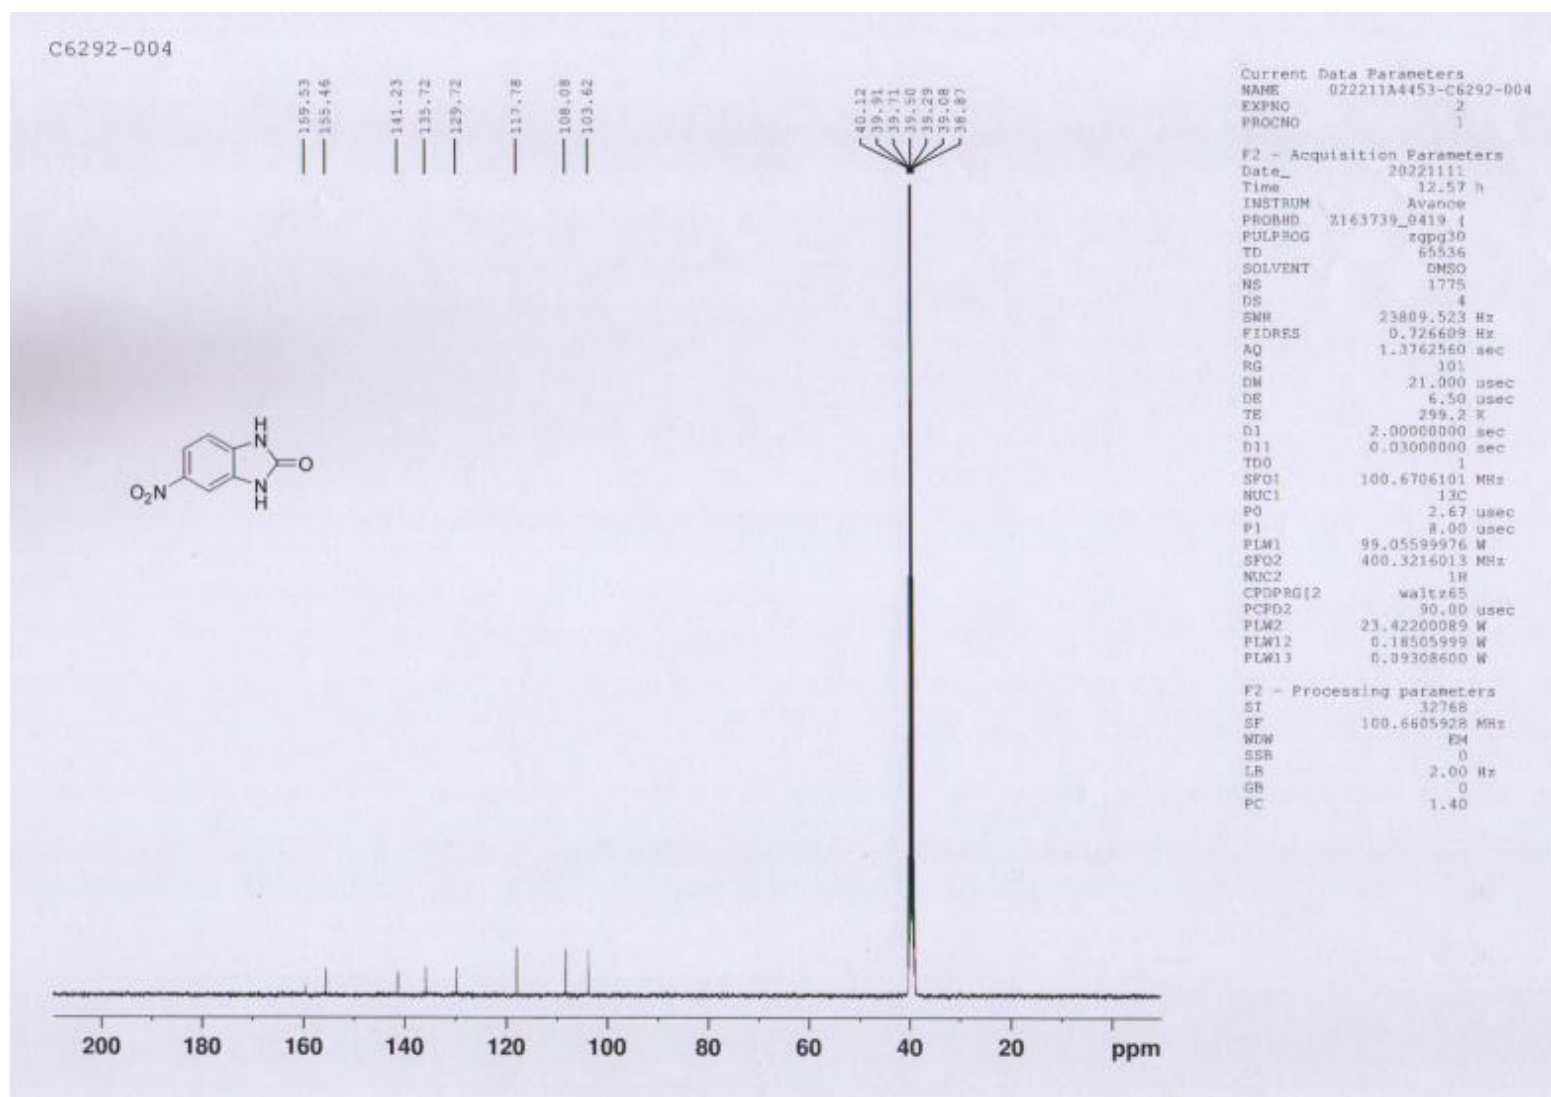

C6292-004

159.53

155.46

141.23

135.72

129.72

117.78

108.08

103.62

Current Data Parameters  
NAME 022211A4453-C6292-004  
EXPNO 2  
PROCNO 1

F2 - Acquisition Parameters  
Date\_ 20221111  
Time 12:57 h  
INSTRUM Avance  
PROBHD Z163739\_0419 1  
PULPROG zgpg30  
TD 65536  
SOLVENT DMSO  
NS 1775  
DS 4  
SWH 23809.523 Hz  
FIDRES 0.726609 Hz  
AQ 1.3762560 sec  
RG 101  
DW 21.000 usec  
DE 6.50 usec  
TE 299.2 K  
D1 2.0000000 sec  
D11 0.0300000 sec  
TD0 1  
SFO1 100.6706101 MHz  
NUC1 13C  
P0 2.67 usec  
P1 8.00 usec  
PLW1 99.05599976 W  
SFO2 400.3216013 MHz  
NUC2 1H  
PCPD2 90.00 usec  
PLW2 23.42200089 W  
PLW12 0.18505999 W  
PLW13 0.09308600 W

F2 - Processing parameters  
SI 32768  
SF 100.6605928 MHz  
WDW EM  
SSB 0  
LB 2.00 Hz  
GB 0  
PC 1.40

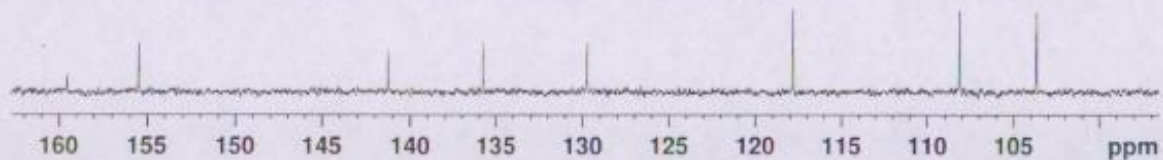

# LCMS of 5-Nitro-1,3-dihydro-2H-benzo[d]imidazol-2-one (2i)

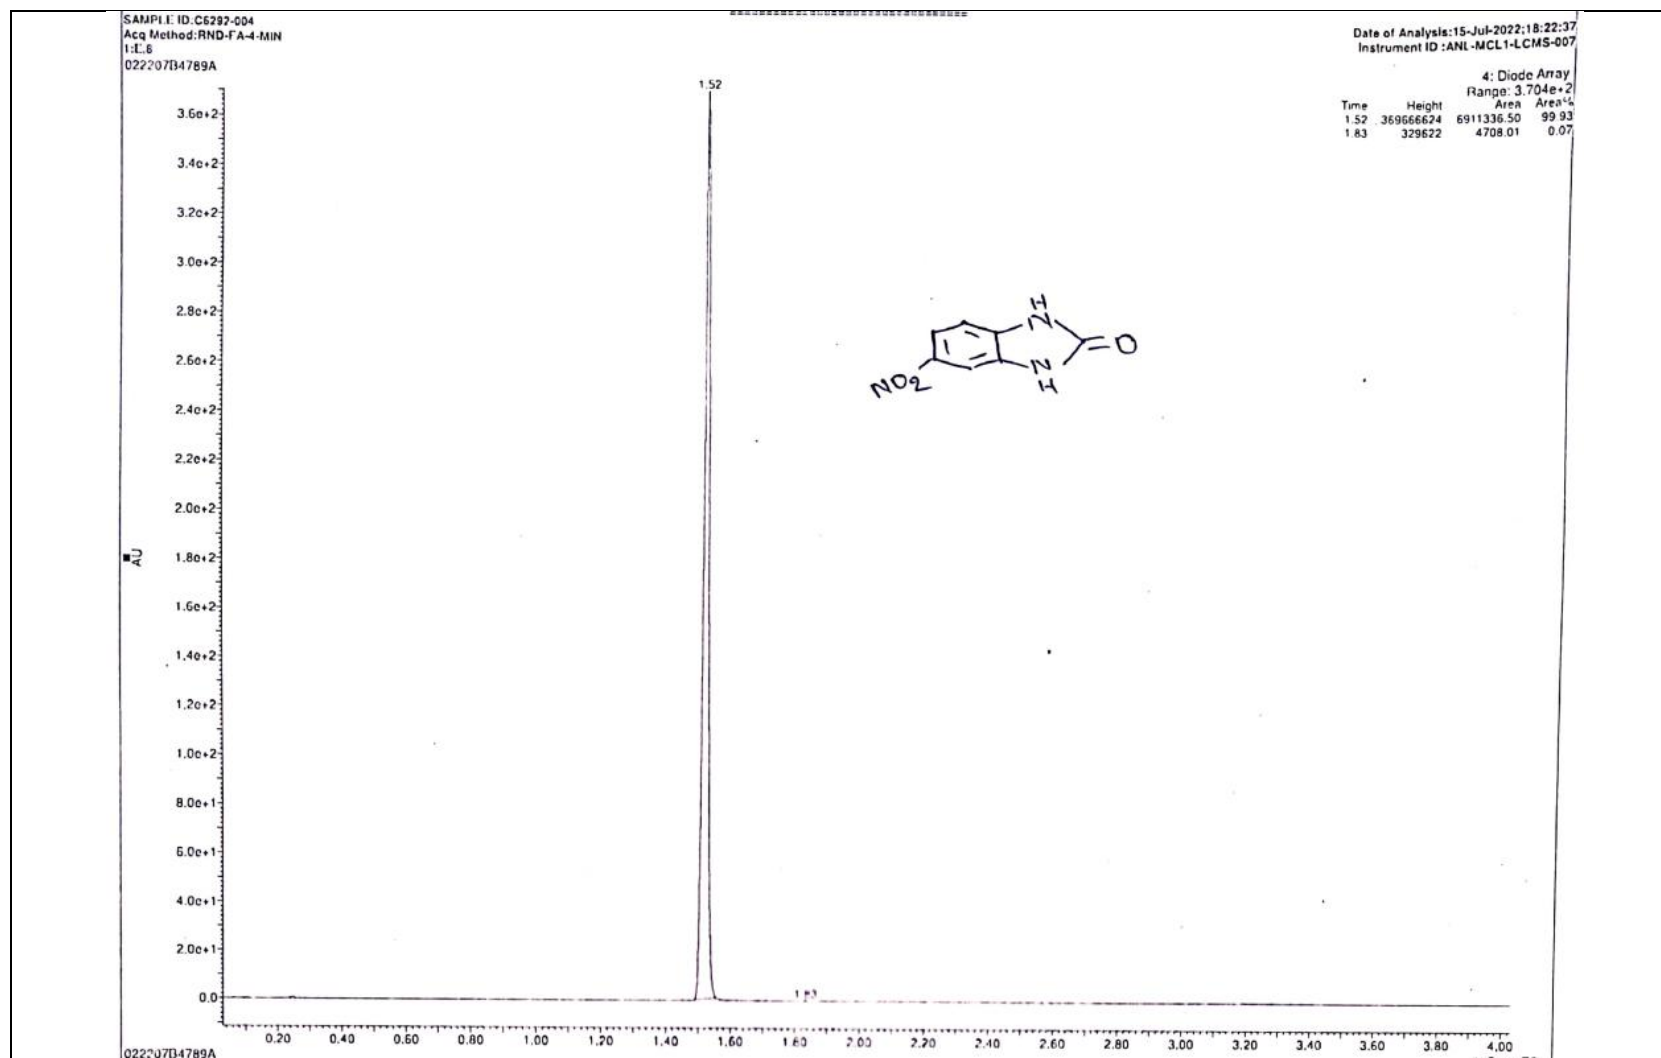



# <sup>1</sup>H NMR of Methyl 2-oxo-2,3-dihydro-1H-benzo[d]imidazole-5-carboxylate (2j)

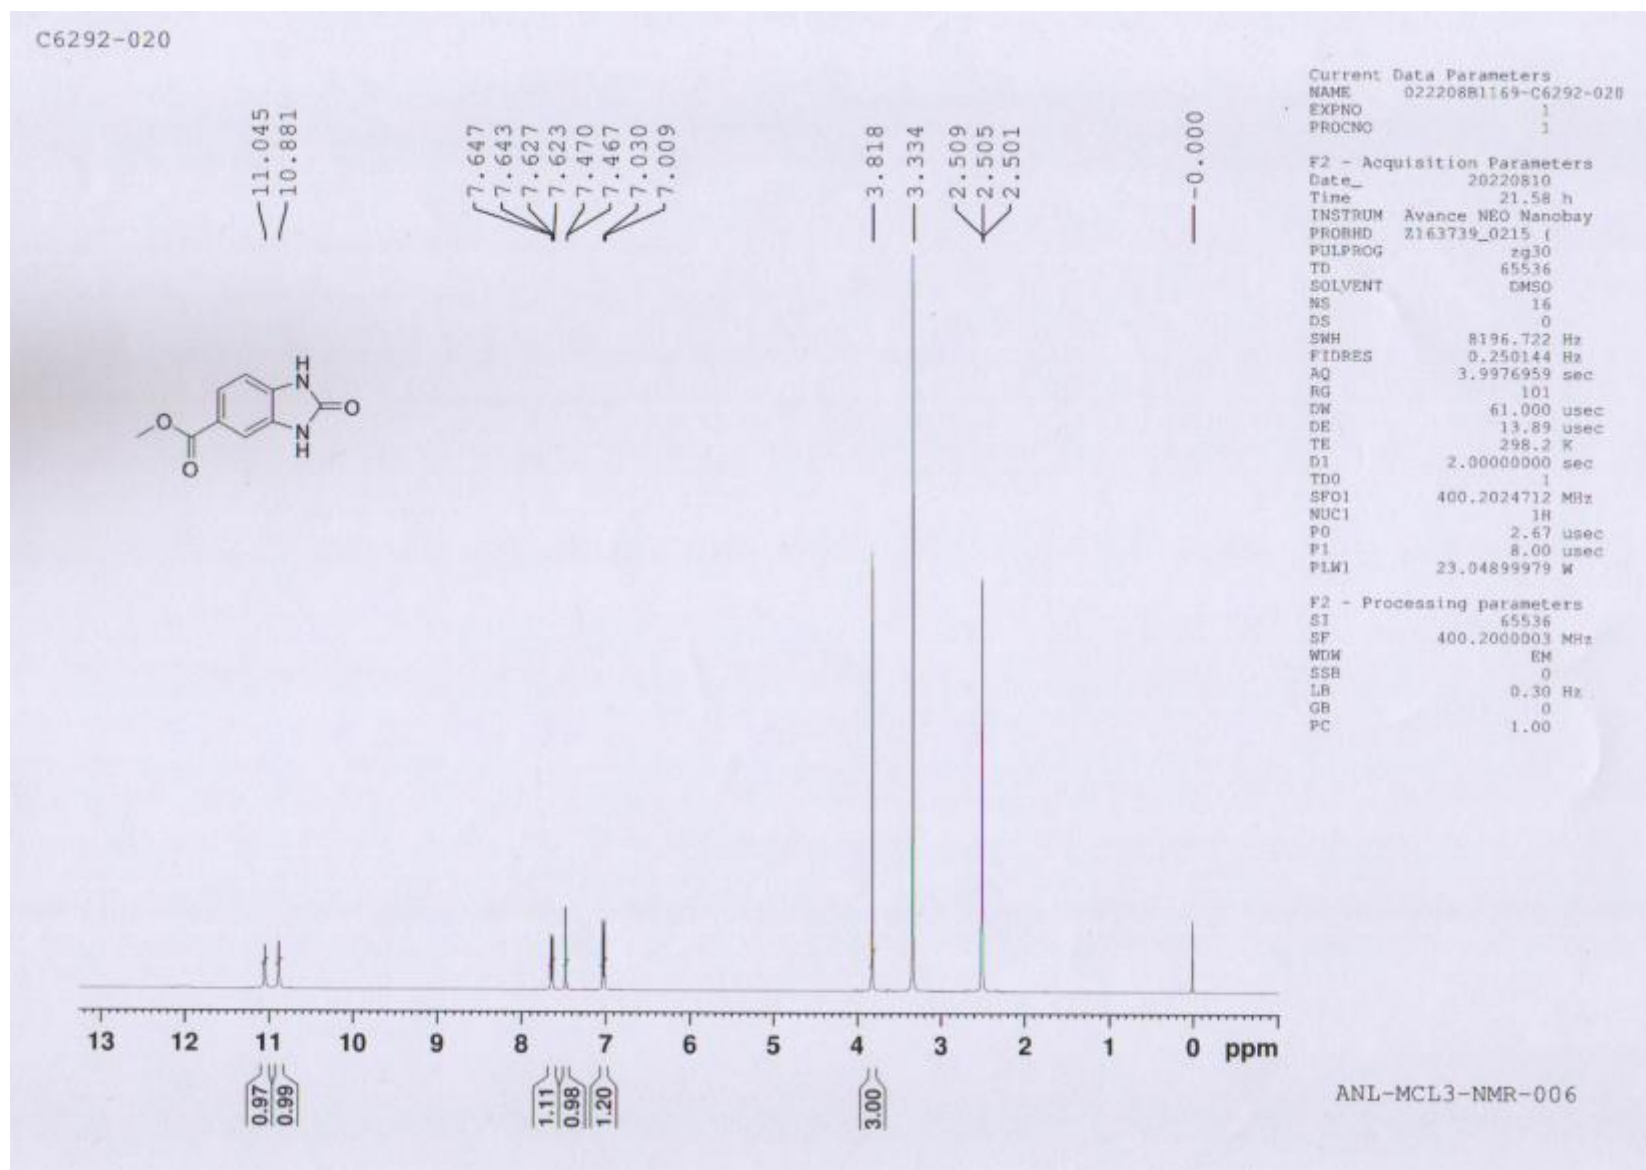

C6292-020

7.647  
7.643  
7.627  
7.623

7.470  
7.467

7.030  
7.009

Current Data Parameters  
NAME 022208B1169-C6292-020  
EXPNO 1  
PROCNO 1

F2 - Acquisition Parameters  
Date\_ 20220810  
Time 21.58 h  
INSTRUM Avance NEO Nanobay  
PROBHD Z163739\_0215 (rg30  
PULPROG zg30  
ID 65536  
SOLVENT DMSO  
NS 16  
DS 0  
SWH 8196.722 Hz  
FIDRES 0.250144 Hz  
AQ 3.9976959 sec  
RG 101  
DW 61.000 usec  
DE 13.89 usec  
TE 298.2 K  
D1 2.00000000 sec  
TD0 1  
SFO1 400.2024712 MHz  
NUC1 1H  
PO 2.67 usec  
PI 8.00 usec  
PLW1 23.04899979 W

F2 - Processing parameters  
SI 65536  
SF 400.2000003 MHz  
WDW EM  
SSB 0  
LB 0.30 Hz  
GB 0  
PC 1.00

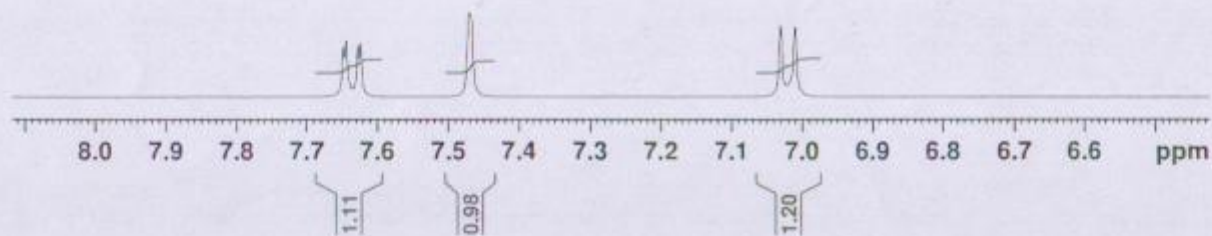

ANL-MCL3-NMR-006



C6292-020

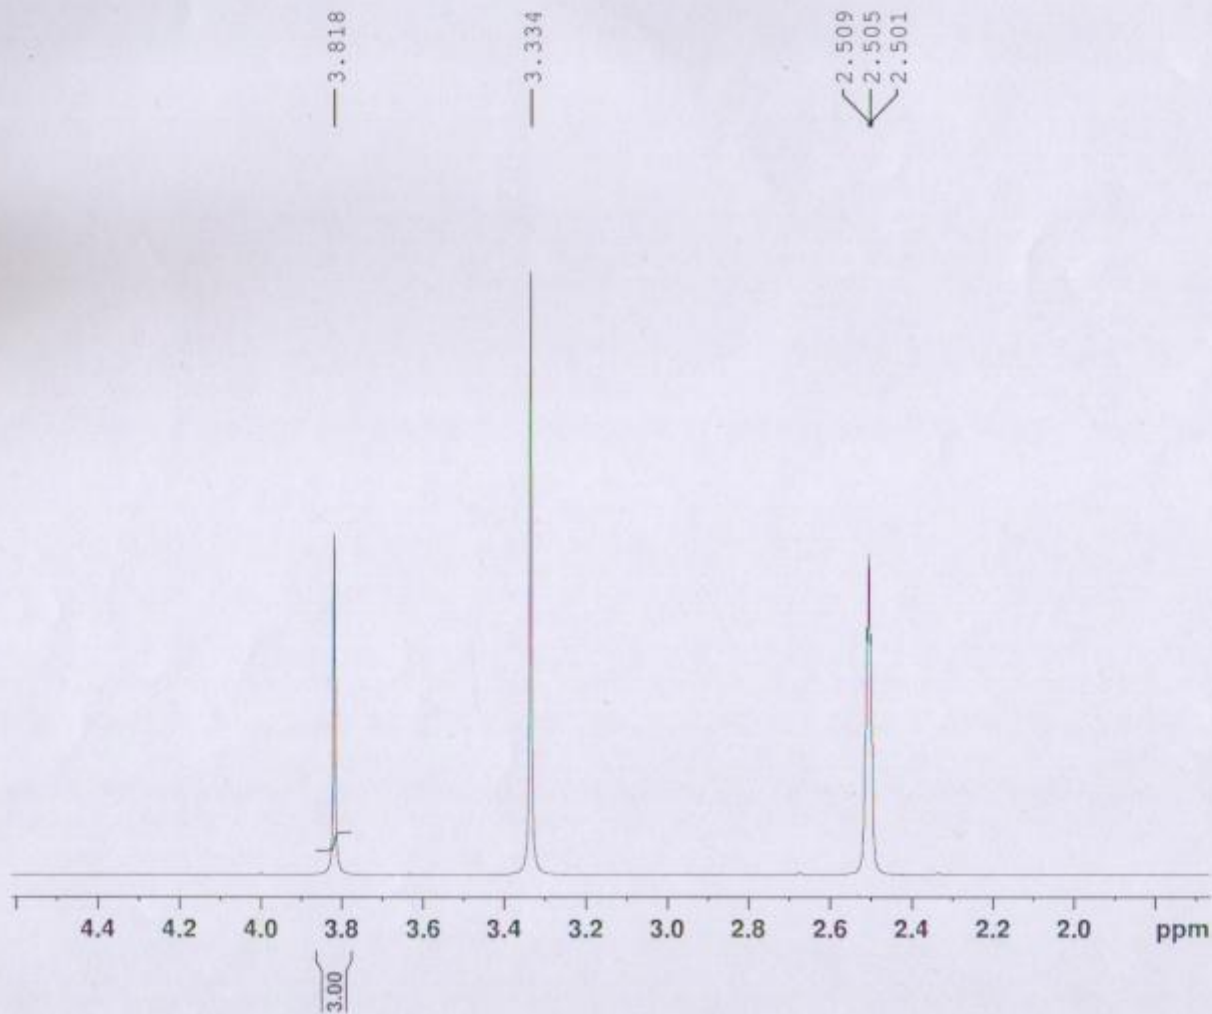

Current Data Parameters  
NAME 022208B1169-C6292-020  
EXPNO 1  
PROCNO 1

F2 - Acquisition Parameters  
Date\_ 20220810  
Time 21.58 h  
INSTRUM Avance NEO Nanobay  
PROBHD Z163739\_0215 ( )  
PULPROG zg30  
TD 65536  
SOLVENT DMSO  
NS 16  
DS 0  
SWH 8196.722 Hz  
FIDRES 0.250144 Hz  
AQ 3.9976959 sec  
RG 101  
DW 61.000 usec  
DE 13.89 usec  
TE 298.2 K  
D1 2.00000000 sec  
TDD 1  
SFO1 400.2024712 MHz  
NUC1 1H  
PO 2.67 usec  
P1 8.00 usec  
PLW1 23.04899979 W

F2 - Processing parameters  
SI 65536  
SF 400.2000003 MHz  
WDW EM  
SSB 0  
LB 0.30 Hz  
GB 0  
PC 1.00

ANL-MCL3-NMR-006

# 13C NMR of Methyl 2-oxo-2,3-dihydro-1H-benzo[d]imidazole-5-carboxylate (2j)

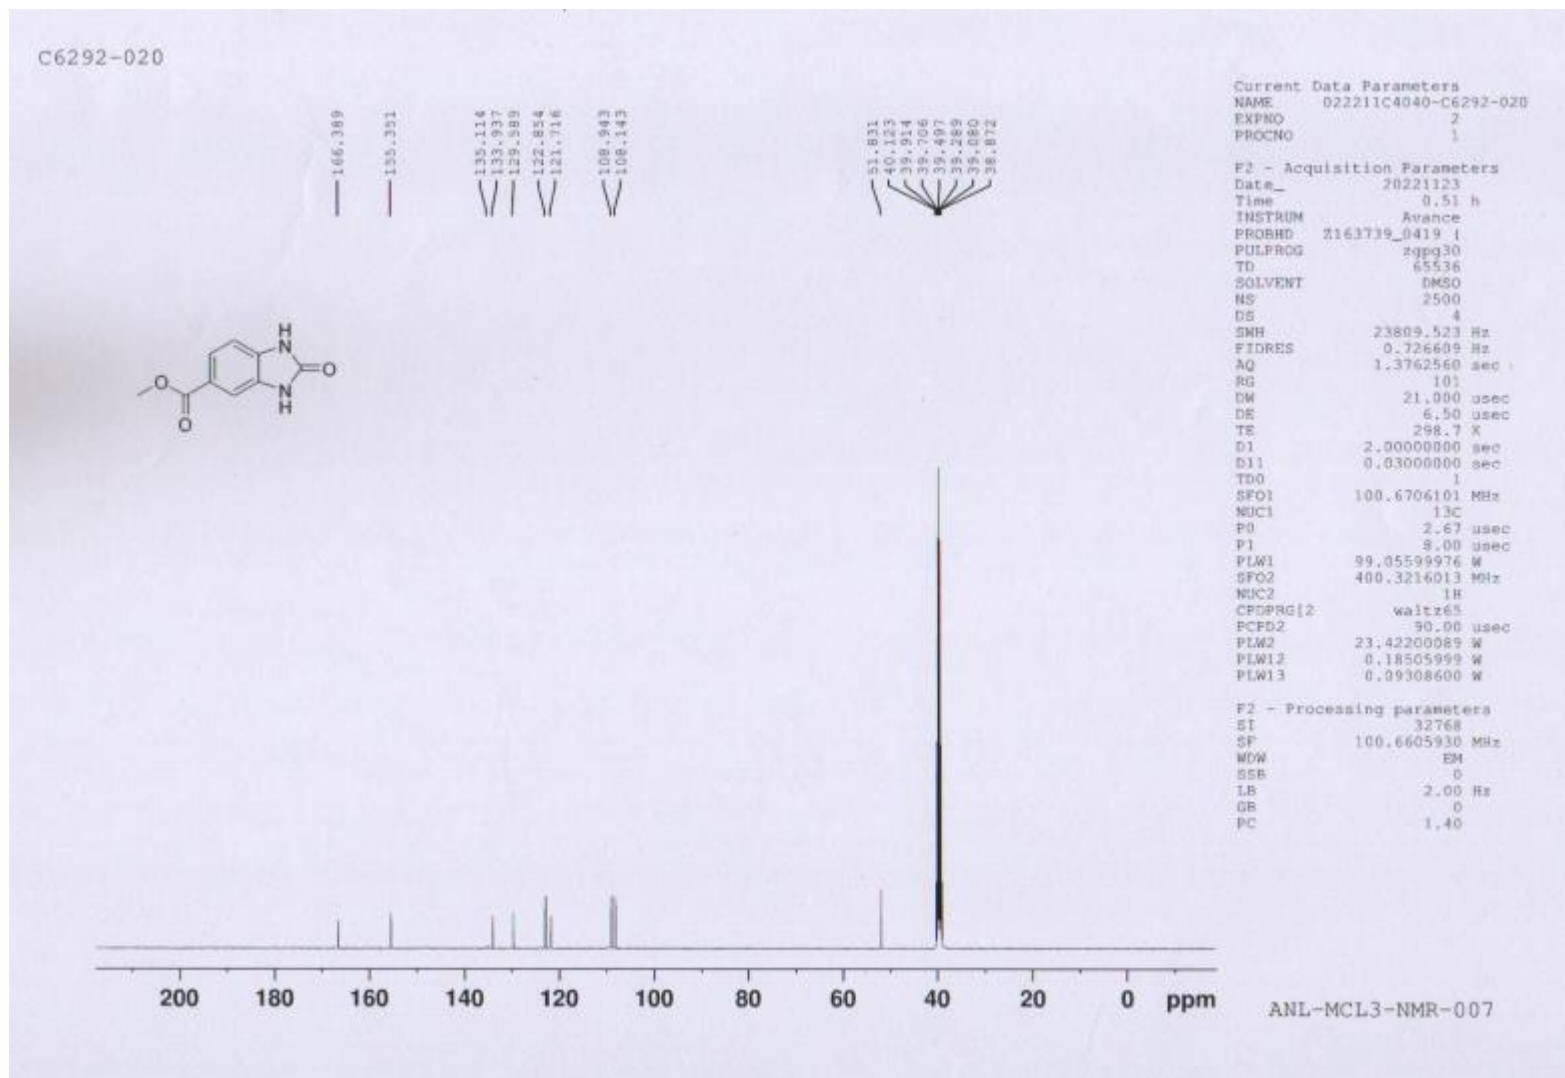

C6292-020

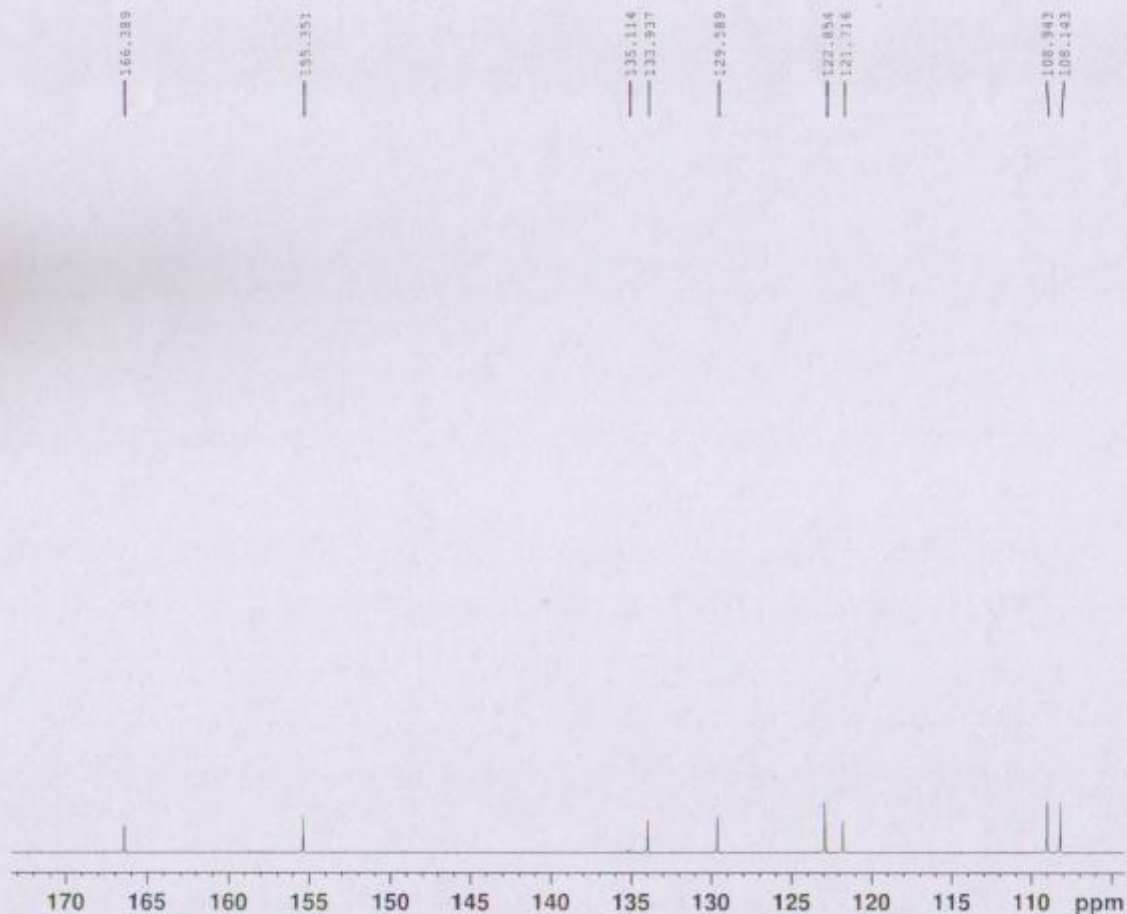

Current Data Parameters  
NAME 022211C4040-C6292-020  
EXPNO 2  
PROCNO 1

F2 - Acquisition Parameters  
Date\_ 20221123  
Time 0.51 h  
INSTRUM Avance  
PROBHD Z163735\_0419 (4  
PULPROG zgpg30  
TD 65536  
SOLVENT DMSO  
NS 2500  
DS 4  
SWH 23809.523 Hz  
FIDRES 0.726609 Hz  
AQ 1.3762560 sec  
RG 101  
DM 21.000 usec  
CE 6.50 usec  
TE 298.2 K  
D1 2.0000000 sec  
D11 0.0300000 sec  
TDO 1  
SFO1 100.6706101 MHz  
NUC1 13C  
P0 2.67 usec  
P1 5.00 usec  
PLW1 99.05599976 W  
SFO2 400.3216013 MHz  
NUC2 1H  
CPDPRG2 waltz165  
PCPD2 90.00 usec  
PLW2 23.42200089 W  
PLW12 0.18505999 W  
PLW13 0.09308600 W

F2 - Processing parameters  
SI 32768  
SF 100.6405930 MHz  
WDW EM  
SSB 0  
LB 2.00 Hz  
GB 0  
PC 1.40

ANL-MCL3-NMR-007

C6292-020

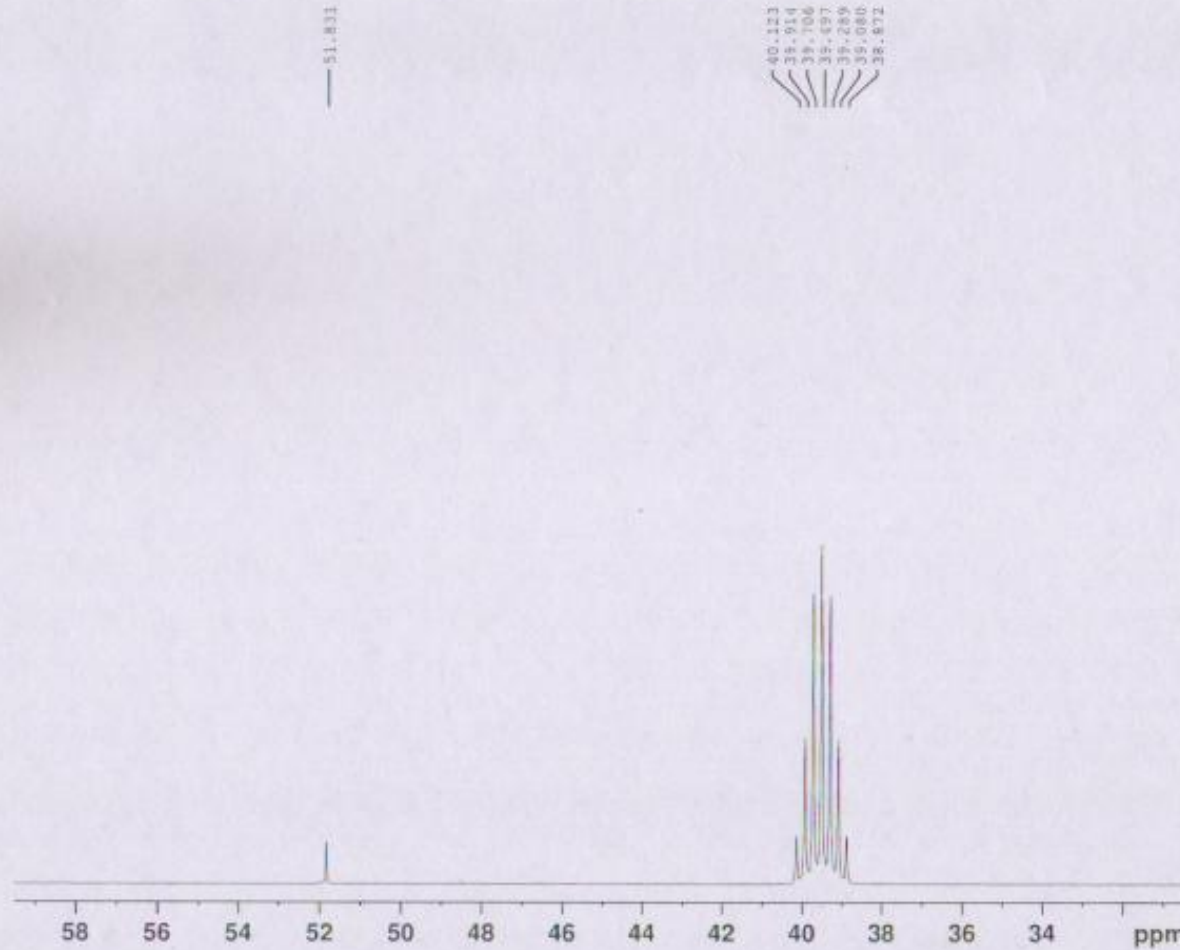

Current Data Parameters  
NAME 022211C4040-C6292-020  
EXPTNO 2  
PROCNO 1

F2 - Acquisition Parameters  
Date\_ 20221123  
Time 0.51 h  
INSTRUM Avance  
PROBHD Z163739\_0419 (   
PULPROG epgg30  
TD 65536  
SOLVENT DMSO  
NS 2500  
DS 4  
SWH 23809.523 Hz  
FIDRES 0.726609 Hz  
AQ 1.3762560 sec  
RG 101  
DW 21.000 usec  
DE 6.50 usec  
TE 298.7 K  
D1 2.0000000 sec  
D11 0.0300000 sec  
TDD 1  
SFO1 100.6706101 MHz  
NUC1 13C  
P0 2.67 usec  
P1 8.00 usec  
PLM1 99.05599976 W  
SFO2 400.3216013 MHz  
NUC2 1H  
CPDPRG2 waltz65  
PCPD2 90.00 usec  
PLM2 23.42200089 W  
PLM12 0.18505999 W  
PLM13 0.09308600 W

F2 - Processing parameters  
SI 32768  
SF 100.6605930 MHz  
WDW EM  
SSB 0  
LB 2.00 Hz  
GB 0  
PC 1.40

ANL-MCL3-NMR-007

# LCMS of Methyl 2-oxo-2,3-dihydro-1*H*-benzo[*d*]imidazole-5-carboxylate (2j)

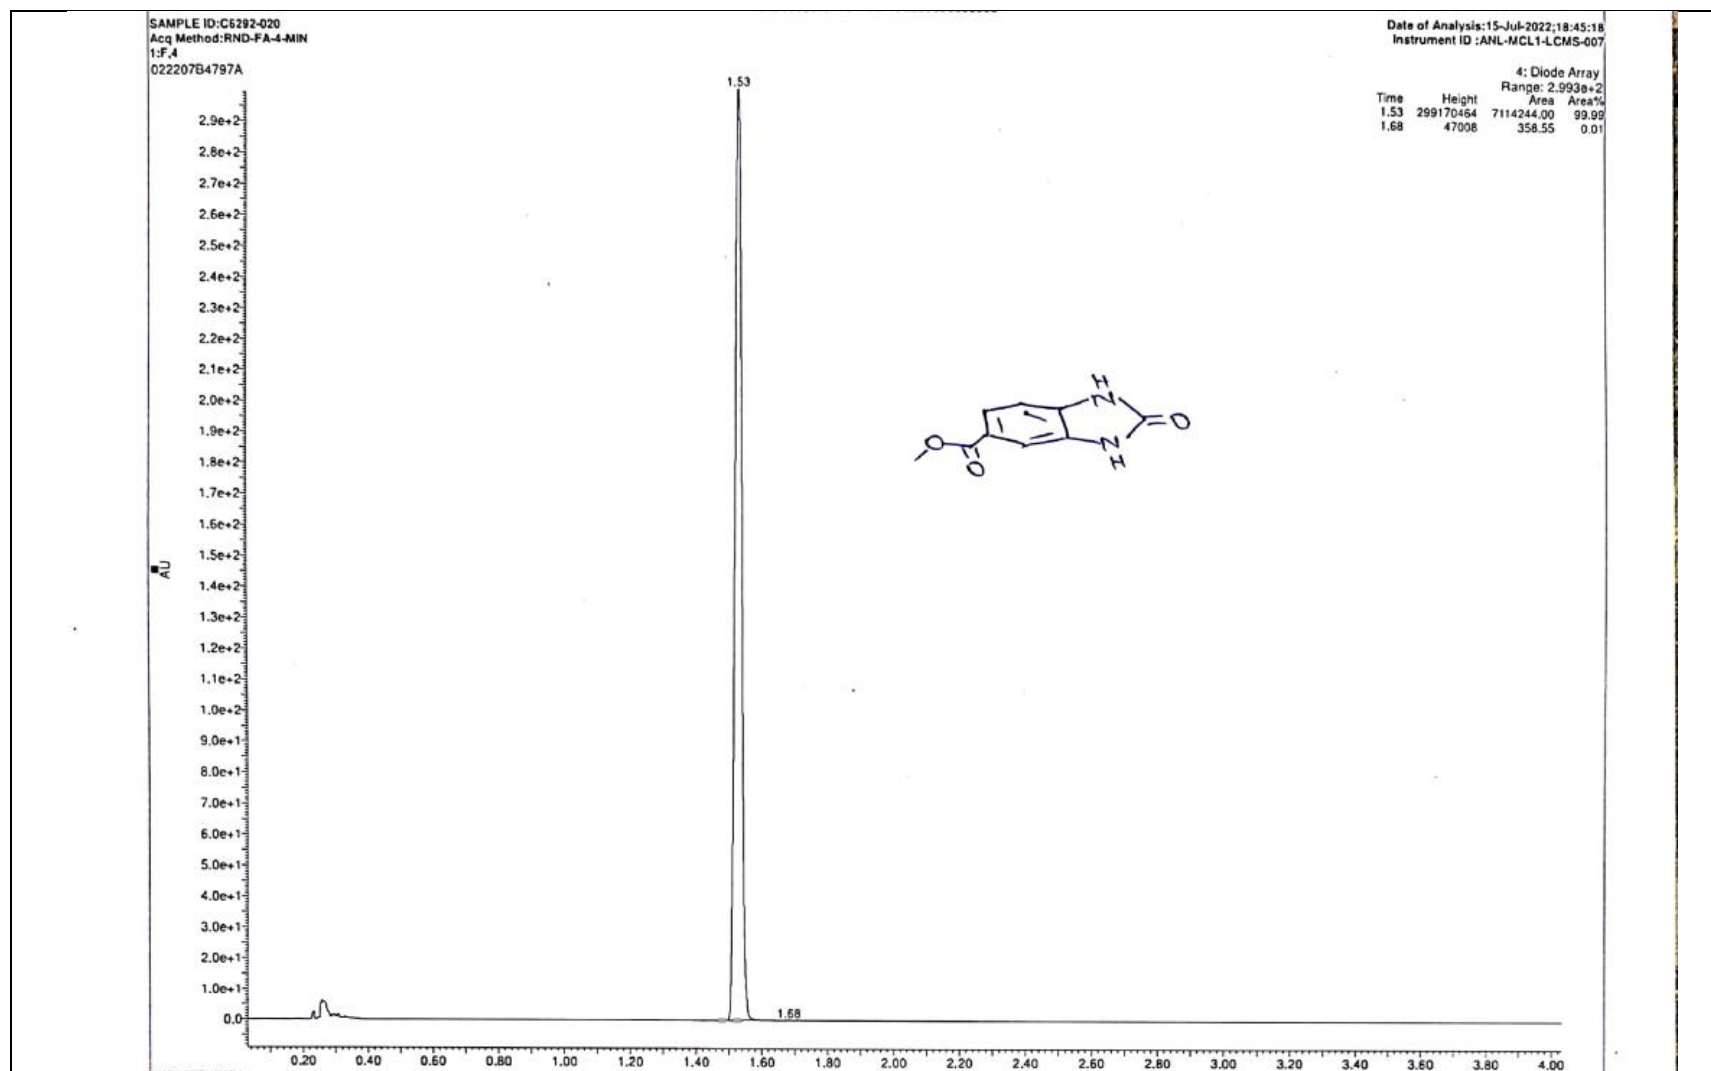

SAMPLE ID: CENY-009  
FID: FID-7444M  
022078197A.G0 (1.53)

Date of Analysis: Jul-2022 18:45:18  
Instrument ID: JNL-MCL-LCMS-007  
11 Scan ES+  
3.47ug

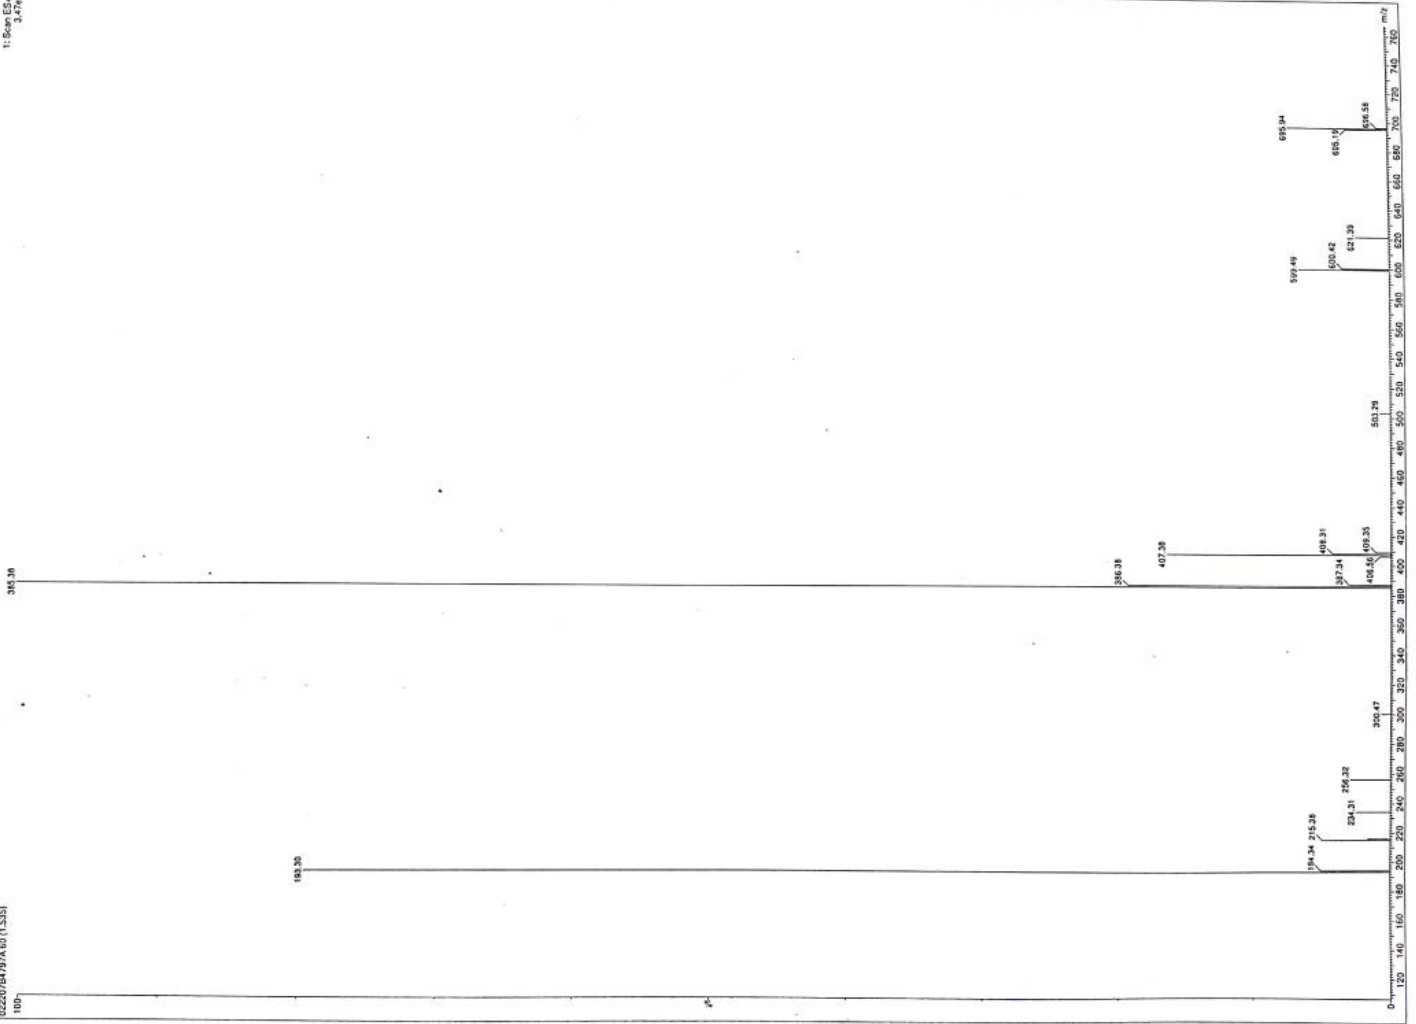

# <sup>1</sup>H NMR of 1-Methyl-1,3-dihydro-2H-benzo[d]imidazol-2-one (2k)

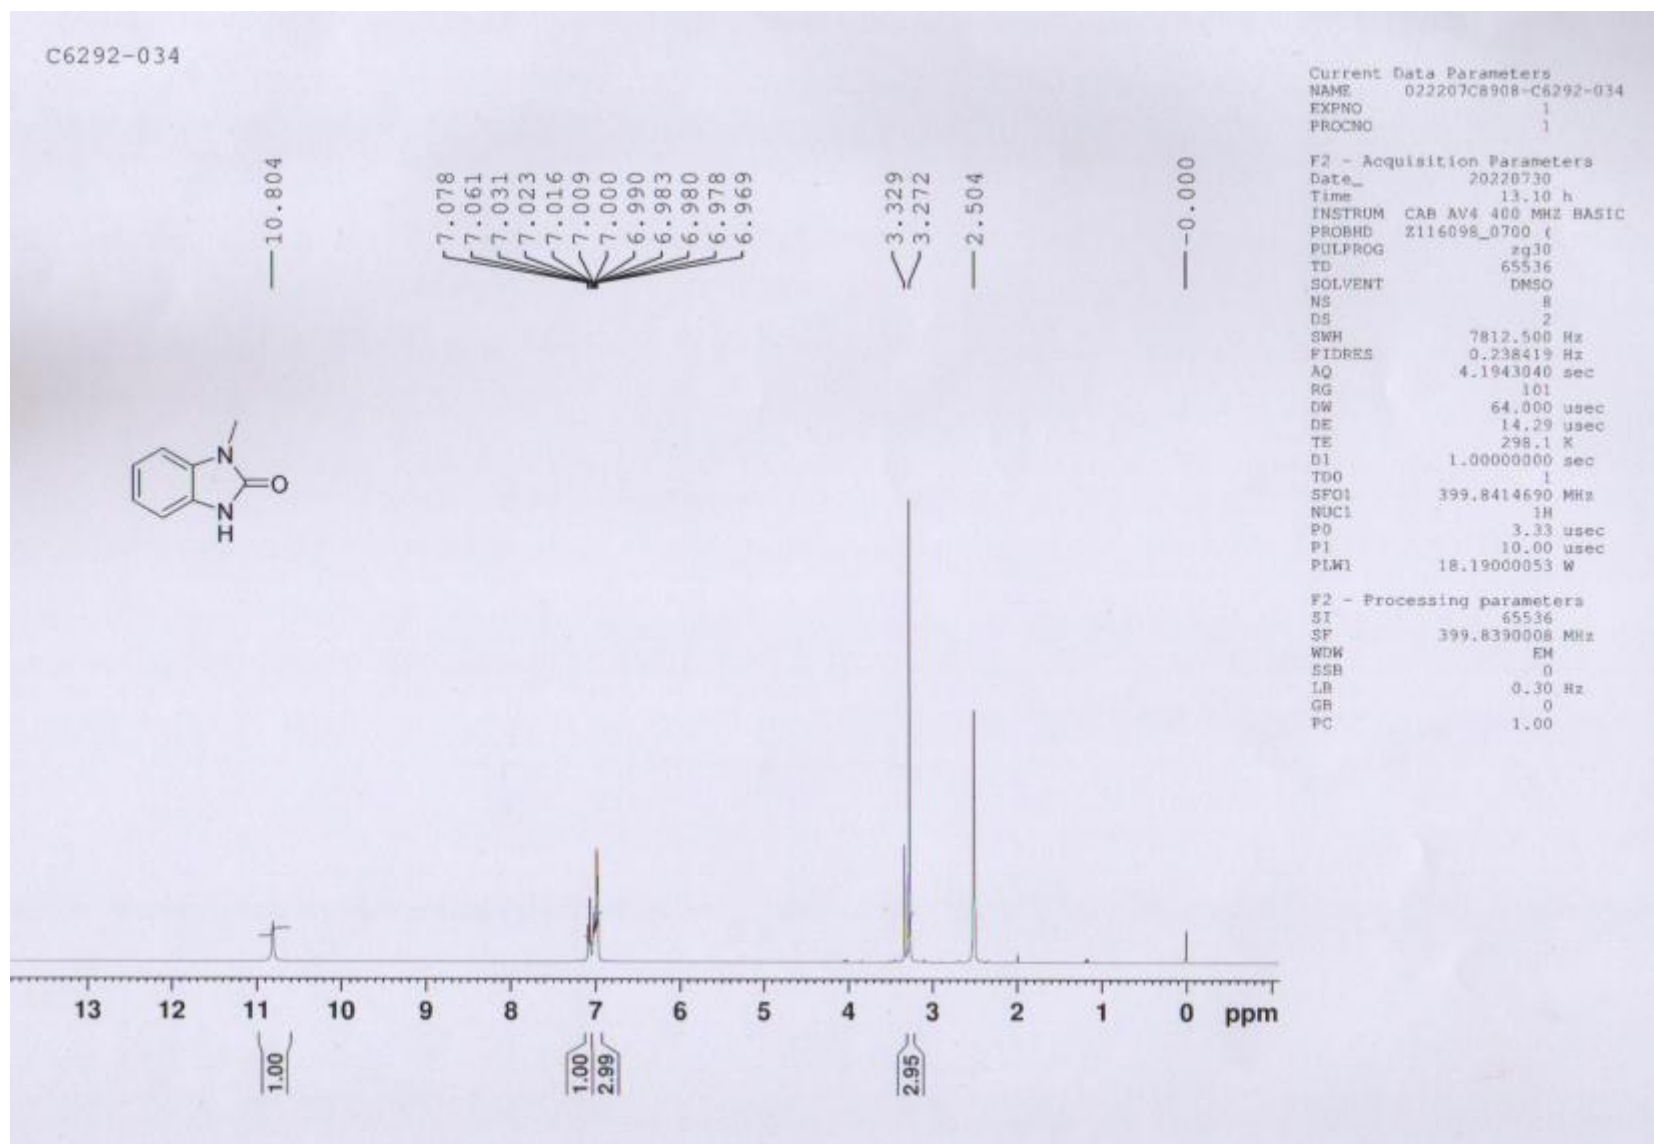

C6292-034

7.078  
7.061  
7.031  
7.023  
7.016  
7.009  
7.000  
6.990  
6.983  
6.980  
6.978  
6.969

Current Data Parameters  
NAME 022207C8908-C6292-034  
EXPNO 1  
PROCNO 1

F2 - Acquisition Parameters  
Date\_ 20220730  
Time 13.10 h  
INSTRUM CAB AV4 400 MHZ BASIC  
PROBHD Z116098\_0700 ( )  
PULPROG zg30  
TD 65536  
SOLVENT DMSO  
NS 8  
DS 2  
SWH 7812.500 Hz  
FIDRES 0.238419 Hz  
AQ 4.1943040 sec  
RG 101  
DW 64.000 usec  
DE 14.29 usec  
TE 298.1 K  
D1 1.00000000 sec  
TD0 1  
SFO1 399.8414590 MHz  
NUC1 1H  
P0 3.33 usec  
P1 10.00 usec  
PLW1 18.19000053 W

F2 - Processing parameters  
SI 65536  
SF 399.8390008 MHz  
WDW EM  
SSB 0  
LB 0.30 Hz  
GB 0  
PC 1.00

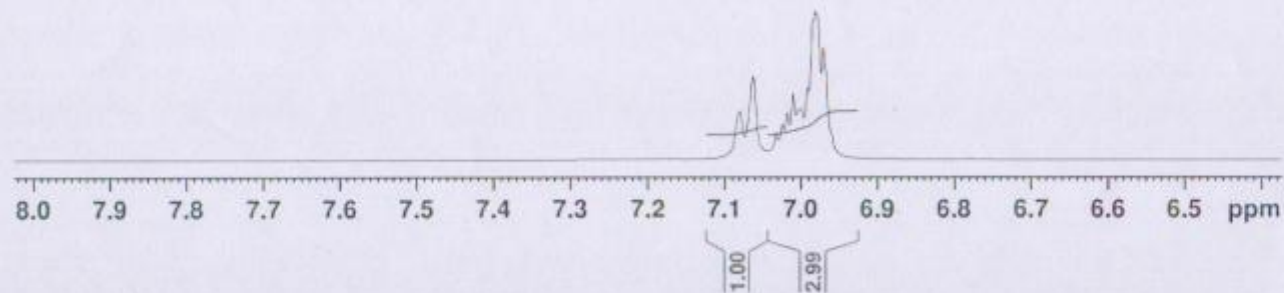



C6292-034

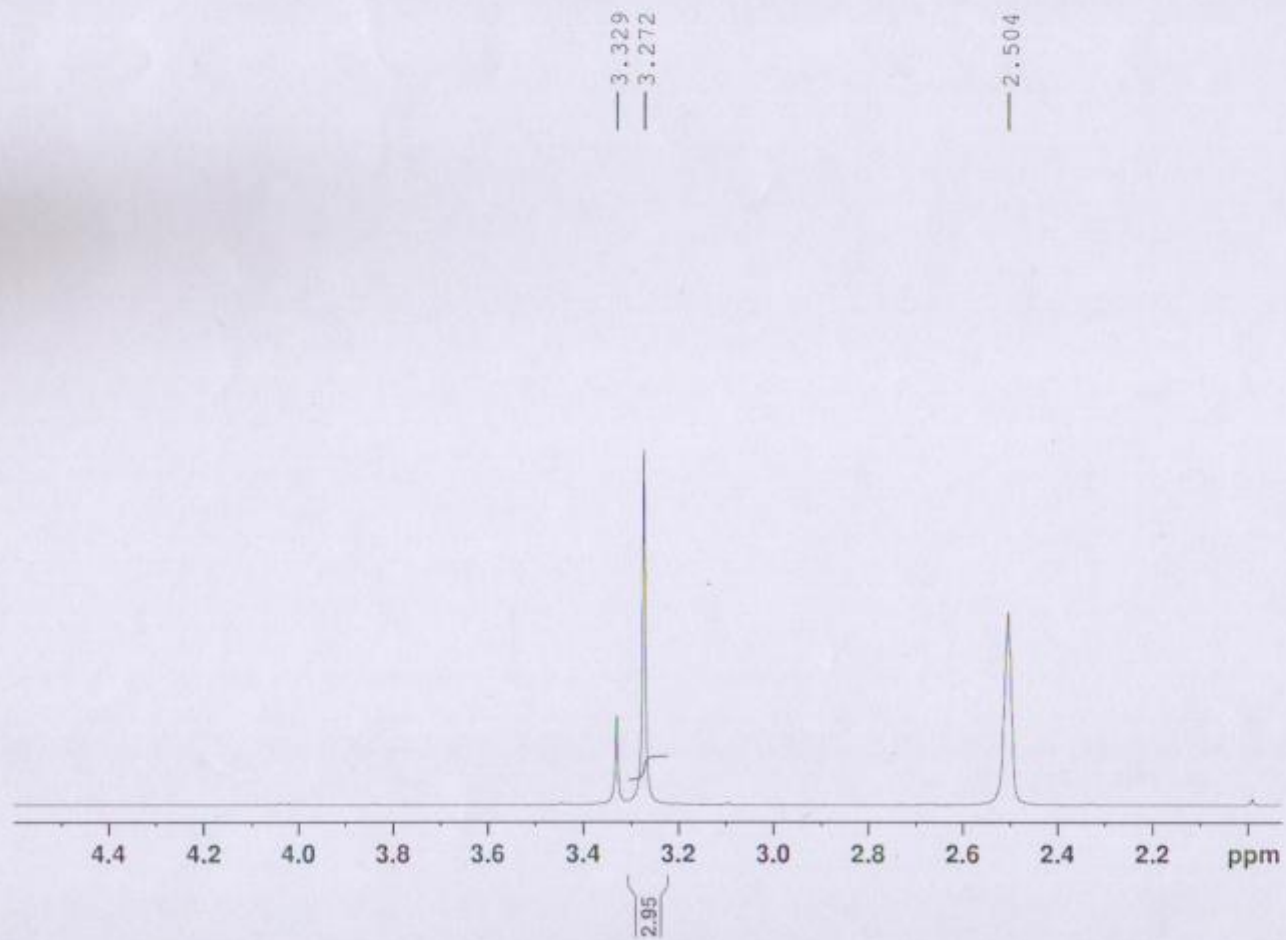

Current Data Parameters  
NAME 022207C8908-C6292-034  
EXPNO 1  
PROCNO 1

F2 - Acquisition Parameters  
Date\_ 20220730  
Time 13.10 h  
INSTRUM CAB AV4 400 MHz BASIC  
PROBHD Z116098\_0700 4  
PULPROG zg30  
TD 65536  
SOLVENT DMSO  
NS 8  
DS 2  
SWH 7812.500 Hz  
FIDRES 0.238419 Hz  
AQ 4.1943040 sec  
RG 101  
DW 64.000 usec  
DE 14.29 usec  
TE 298.1 K  
D1 1.00000000 sec  
TDO 1  
SFO1 399.8414690 MHz  
NUC1 1H  
P0 3.33 usec  
P1 10.00 usec  
PLW1 18.19000053 W

F2 - Processing parameters  
SI 65536  
SF 399.8390008 MHz  
WDW EM  
SSB 0  
LB 0.30 Hz  
GB 0  
PC 1.00

# <sup>13</sup>C NMR of 1-Methyl-1,3-dihydro-2H-benzo[d]imidazol-2-one (2k)

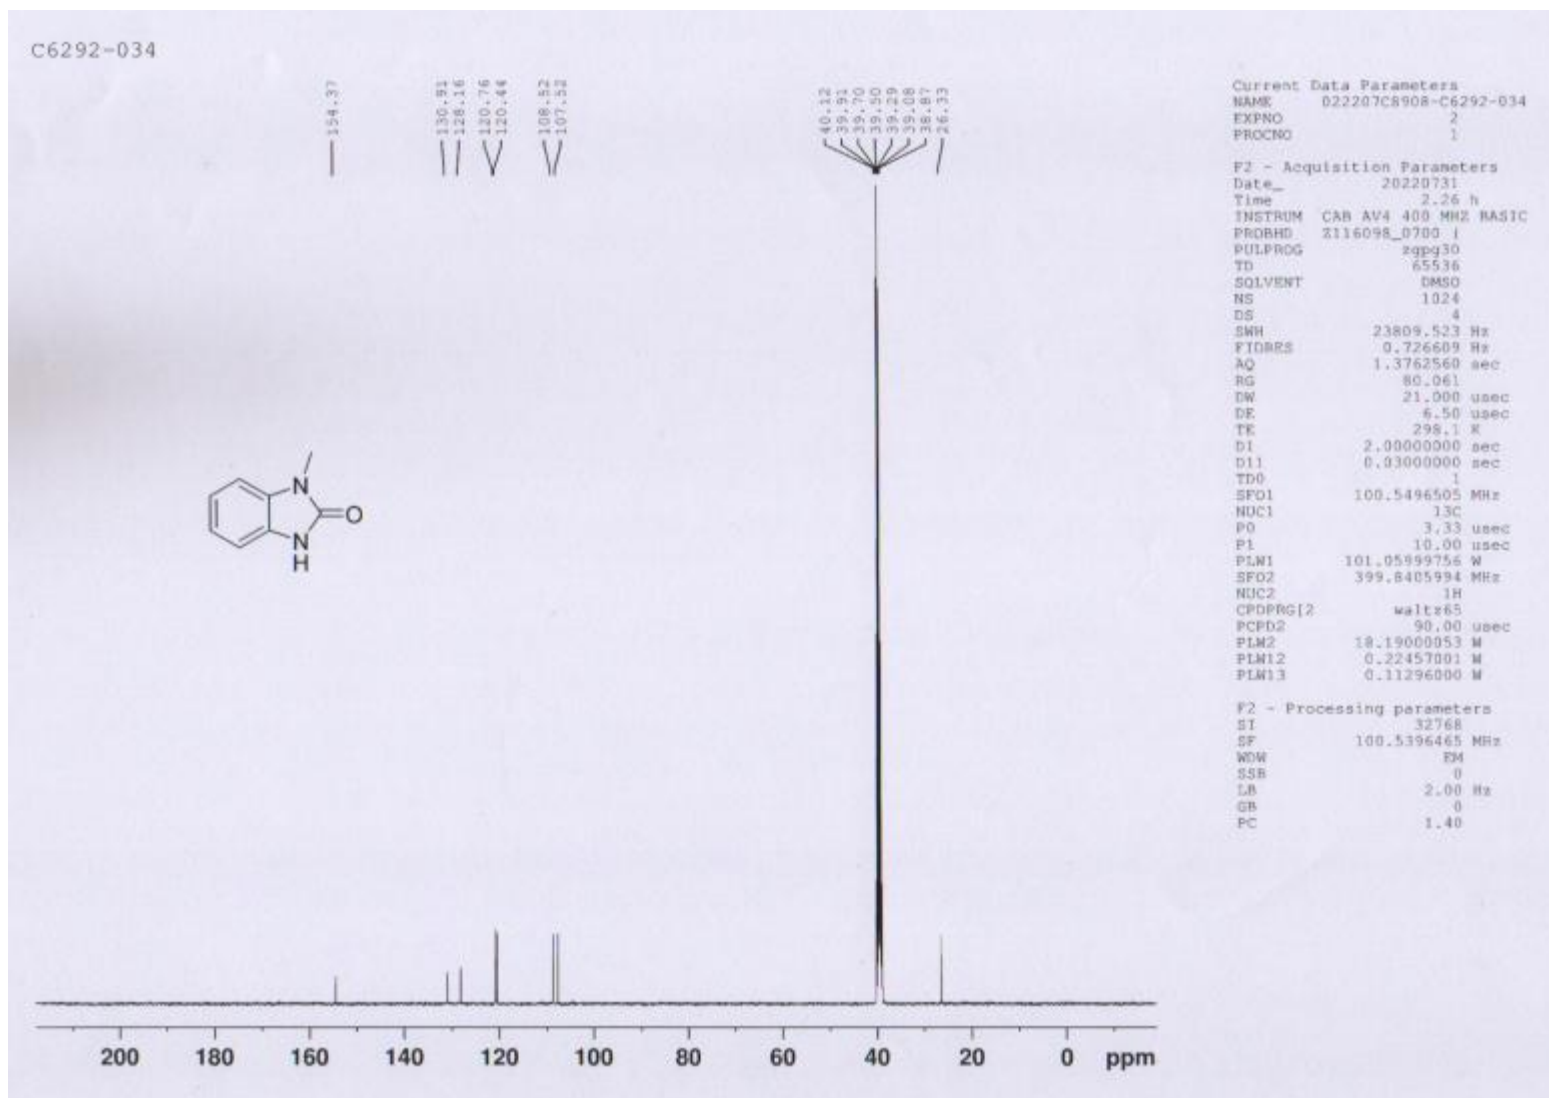

C6292-034

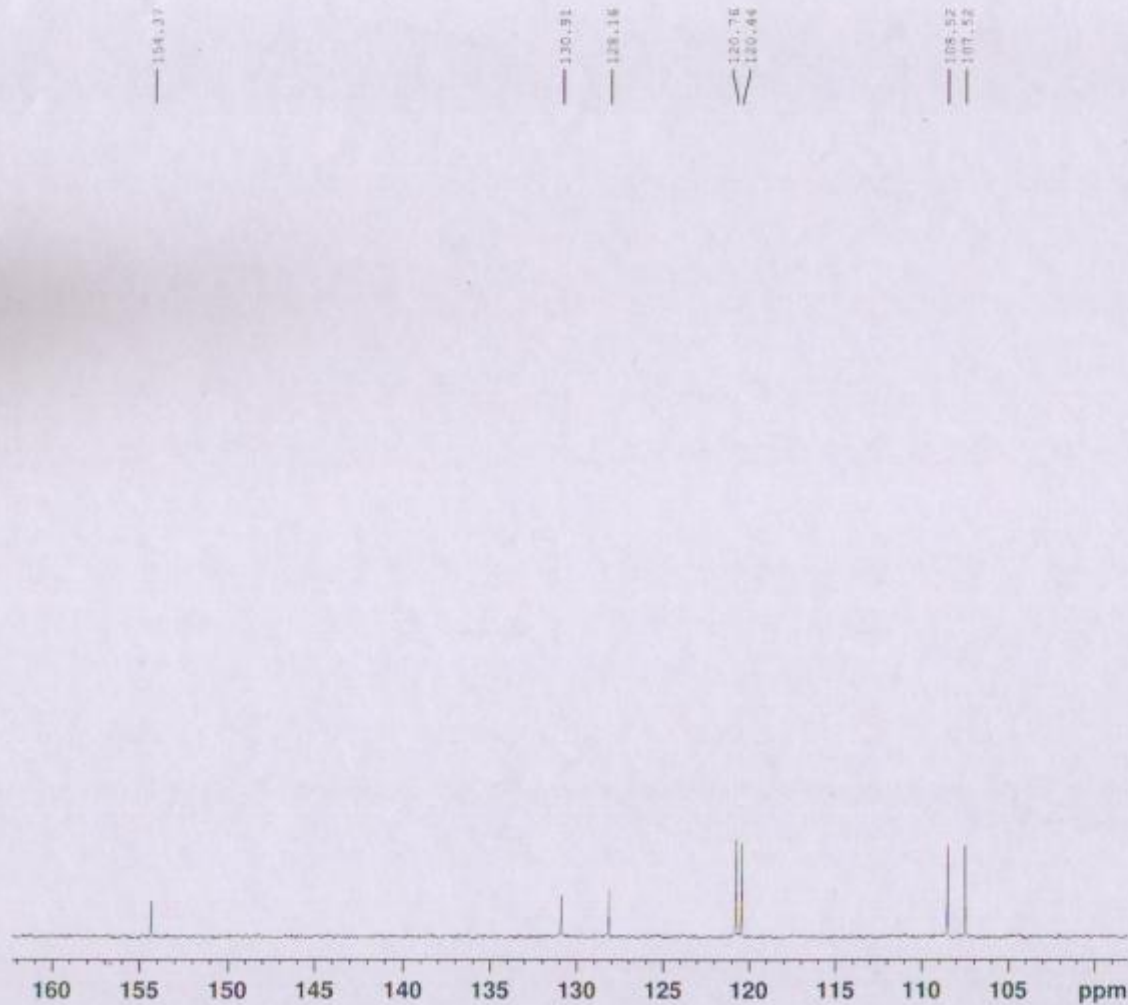

Current Data Parameters  
NAME 022207C8908-C6292-034  
EXENO 2  
PROCNO 1

F2 - Acquisition Parameters  
Date\_ 20220731  
Time 2.26 h  
INSTRUM CAS AV4 400 MHz BASIC  
PROBHD Z116098\_0700 1  
PULPROG zgpg30  
TD 65536  
SOLVENT DMSO  
NS 1024  
DS 4  
SWH 23809.523 Hz  
FIDRES 0.725609 Hz  
AQ 1.3762560 sec  
RG 80.061  
DN 21.000 usec  
DE 6.50 usec  
TE 298.1 K  
D1 2.00000000 sec  
D11 0.03000000 sec  
TDD 1  
SFO1 100.5496505 MHz  
NUC1 13C  
PC 3.33 usec  
P1 10.00 usec  
PLW1 101.05999756 W  
SFO2 399.8405994 MHz  
NUC2 1H  
CPDPRG2 waltz165  
PCPD2 90.00 usec  
PLW2 18.19000053 W  
PLW12 0.22457001 W  
PLW13 0.11296000 W

F2 - Processing parameters  
SI 32768  
SF 100.5396465 MHz  
WDW EM  
SSB 0  
LB 2.00 Hz  
GB 0  
PC 1.40

C6292-034

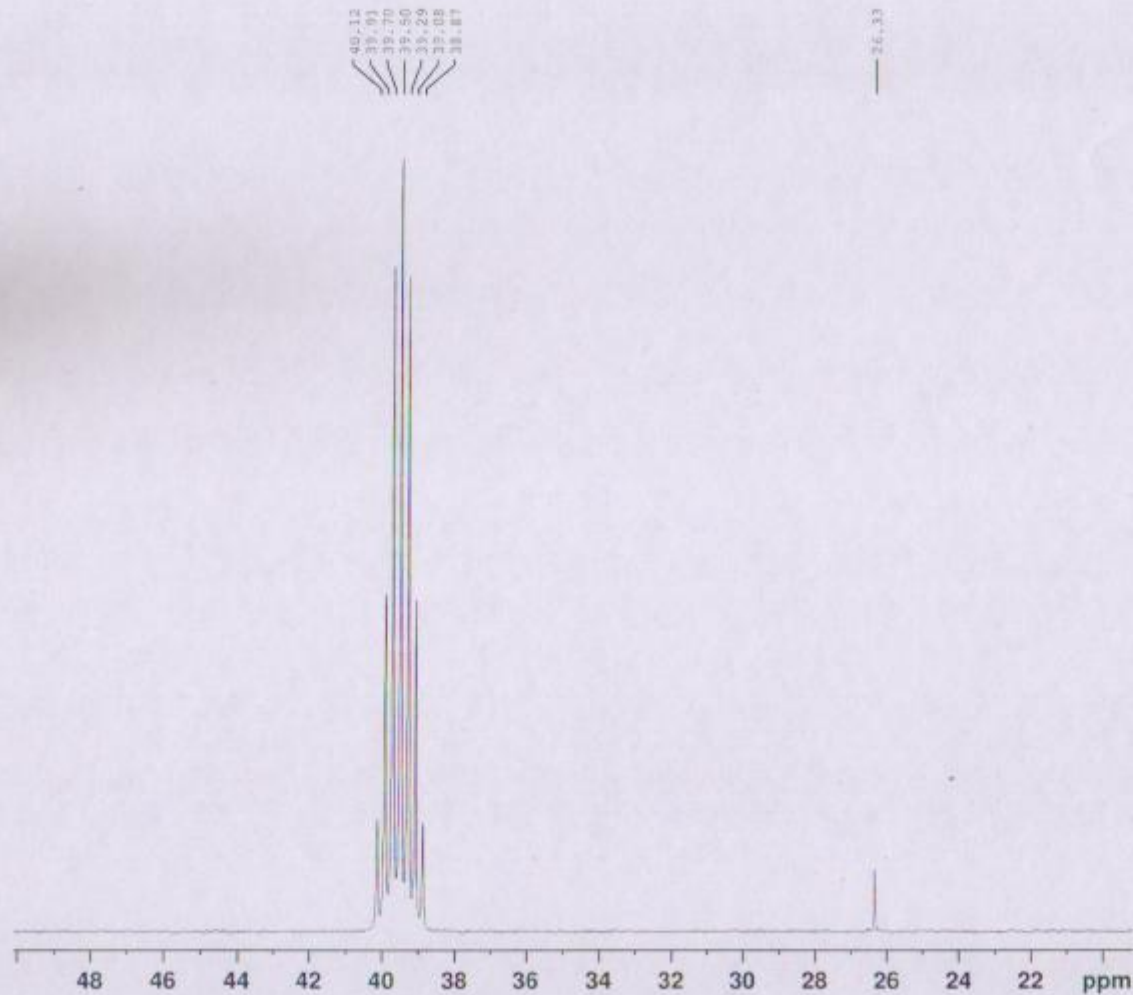

Current Data Parameters  
NAME 022207C8908-C6292-034  
EXPNO 2  
PROCNO 1

F2 - Acquisition Parameters  
Date\_ 20220731  
Time 2.26 h  
INSTRUM CAS AV4 400 MHZ BASIC  
PROBHD Z116098\_0700 1  
PULPROG zgpg30  
TD 65536  
SOLVENT DMSO  
NS 1024  
DS 4  
SWH 23869.523 Hz  
FIDRES 0.726605 Hz  
AQ 1.3762560 sec  
RG 80.061  
CW 21.000 usec  
DE 6.50 usec  
TE 298.1 K  
D1 2.00000000 sec  
D11 0.03000000 sec  
TDO 1  
SFO1 100.5496505 MHz  
NUC1 13C  
PO 3.33 usec  
PI 10.00 usec  
PLW1 101.03999756 W  
SFO2 399.8405994 MHz  
NUC2 1H  
CPDPRG2 waltz65  
PCPD2 90.00 usec  
PLW2 18.19000053 W  
PLW12 0.22457001 W  
PLW13 0.11296000 W

F2 - Processing parameters  
SI 32768  
SF 100.5396465 MHz  
WDW EM  
SSB 0  
LB 2.00 Hz  
GB 0  
PC 1.40

# LCMS of 1-Methyl-1,3-dihydro-2H-benzo[d]imidazol-2-one (2k)

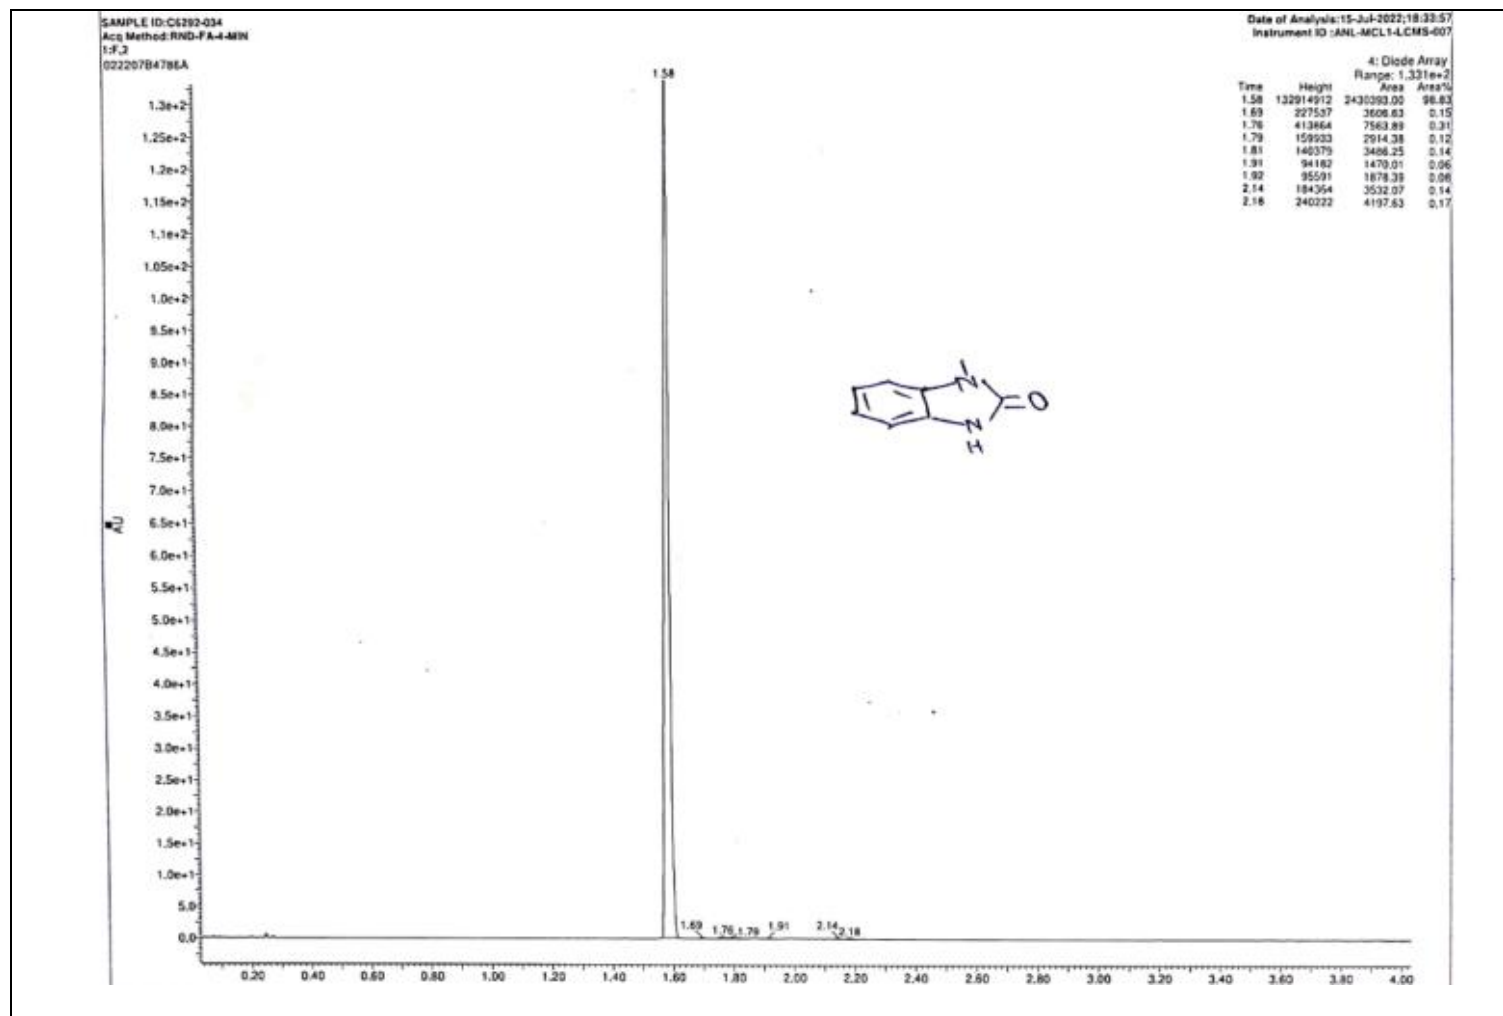









# <sup>13</sup>C NMR of 1,3-Dihydro-2*H*-imidazo[4,5-*b*]pyridin-2-one (2l)

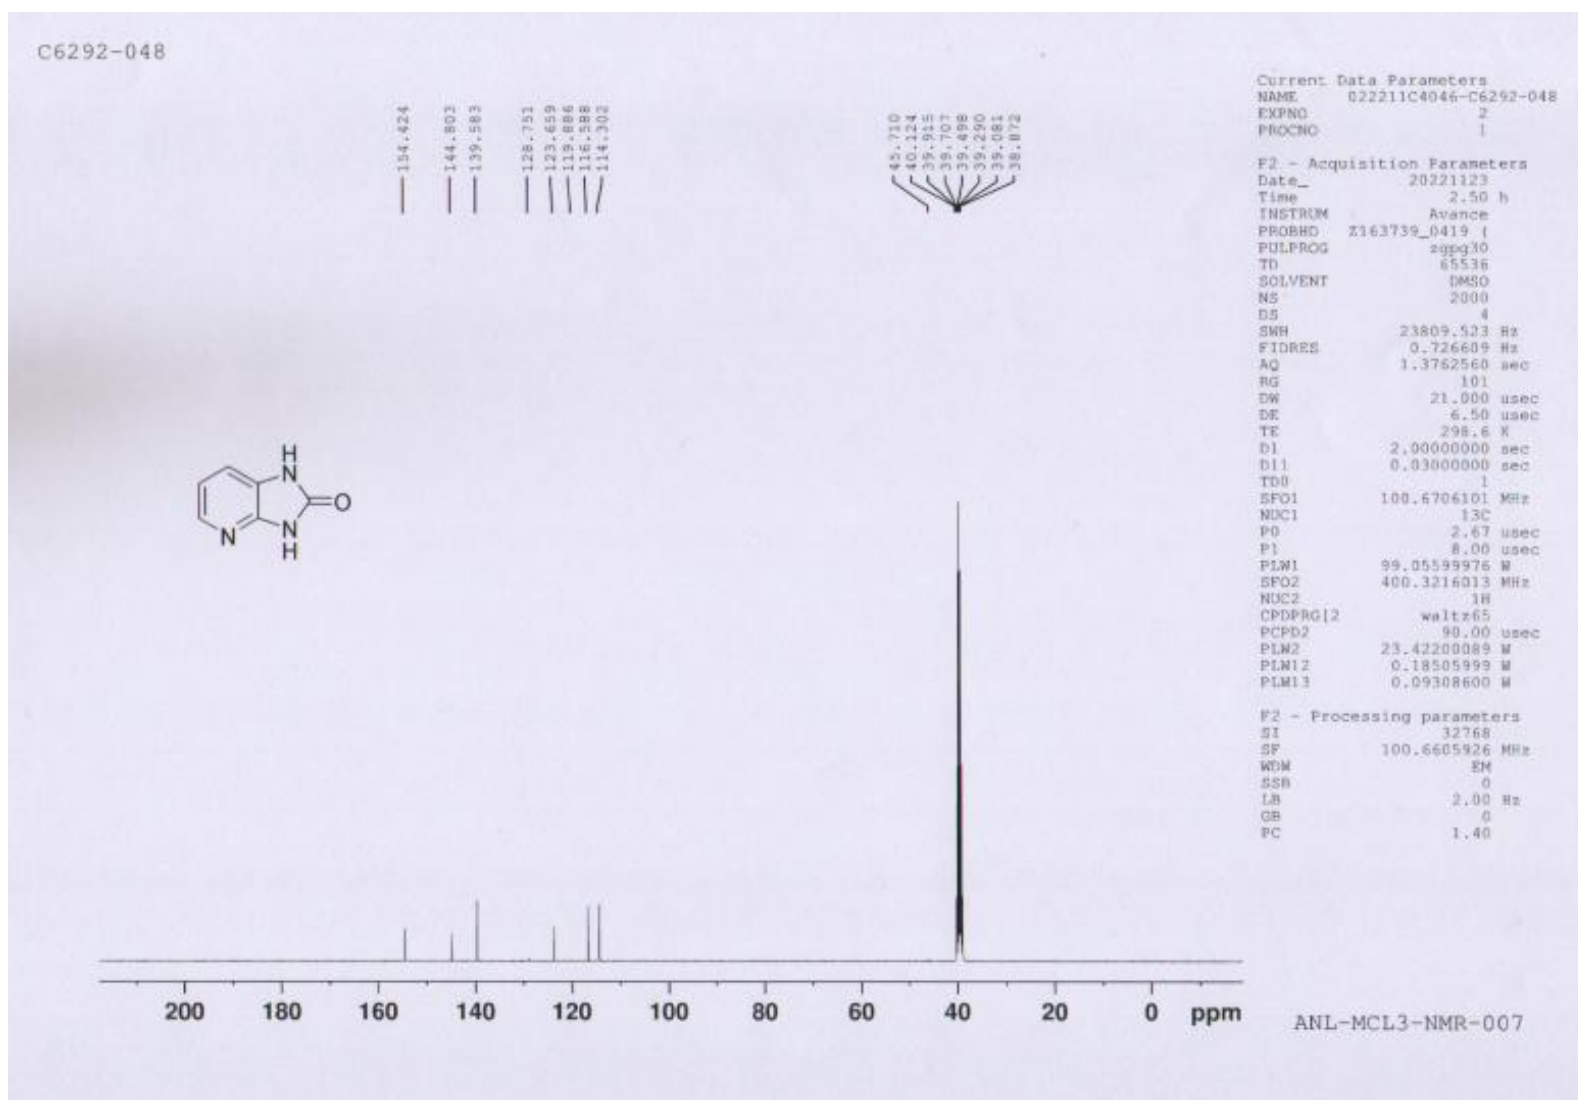

C6292-048

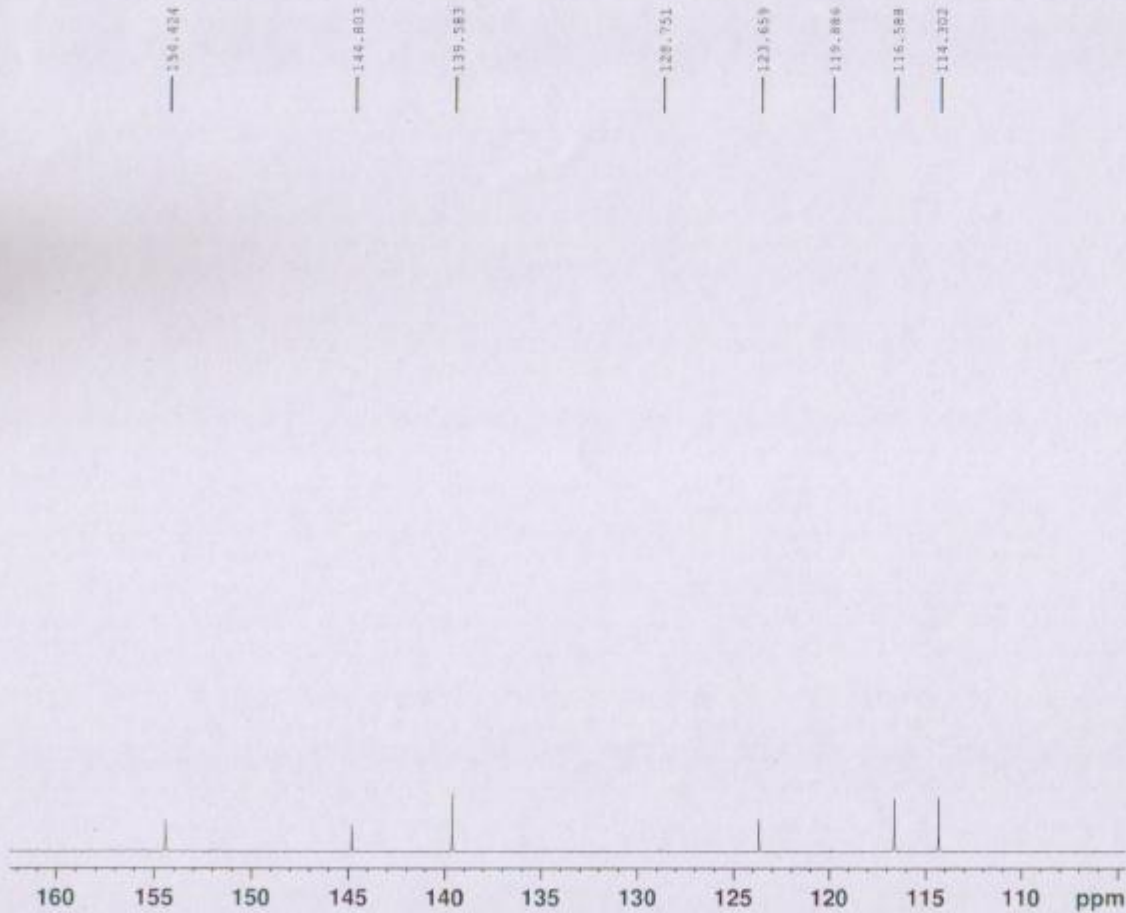

Current Data Parameters  
NAME 022211C4046-C6292-048  
EXPNO 2  
PROCNO 1

F2 - Acquisition Parameters  
Date\_ 20221123  
Time 2.50 h  
INSTRUM Avance  
PROBHD Z163739\_0419 1  
PULPROG zgpg30  
TD 65536  
SOLVENT DMSO  
NS 2000  
DS 4  
SWH 23809.523 Hz  
FIDRES 0.726609 Hz  
AQ 1.3762560 sec  
RG 101  
DW 21.000 usec  
DE 6.50 usec  
TE 298.6 K  
D1 2.00000000 sec  
D11 0.03000000 sec  
TDO 1  
SFO1 100.6706101 MHz  
NUC1 13C  
PO 2.67 usec  
P1 8.00 usec  
PLW1 99.05599976 W  
SFO2 400.3216013 MHz  
NUC2 1H  
CPDPRG2 waltz65  
PCPD2 90.00 usec  
PLW2 23.42200089 W  
PLW12 0.18505999 W  
PLW13 0.09308600 W

F2 - Processing parameters  
SI 32768  
SF 100.6605926 MHz  
WDW EM  
SSB 0  
LB 2.00 Hz  
GB 0  
PC 1.40

ANL-MCL3-NMR-007

# LCMS of 1,3-Dihydro-2H-imidazo[4,5-b]pyridin-2-one (2I)

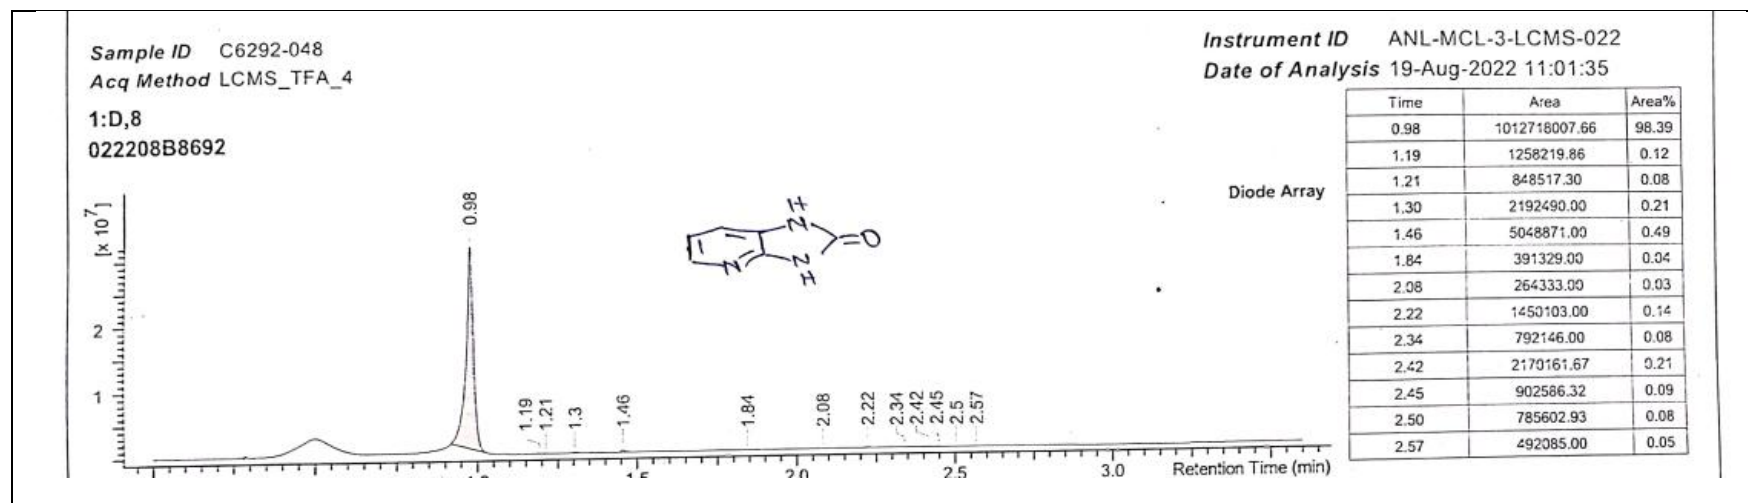

Sample ID C6292-048  
Acq Method LCMS\_TFA\_4

Discovery Chemistry Analytical Services

Instrument ID ANL-MCL-3-LCMS-022  
Date of Analysis 19-Aug-2022 11:01:35

1:D,8  
022208B8692

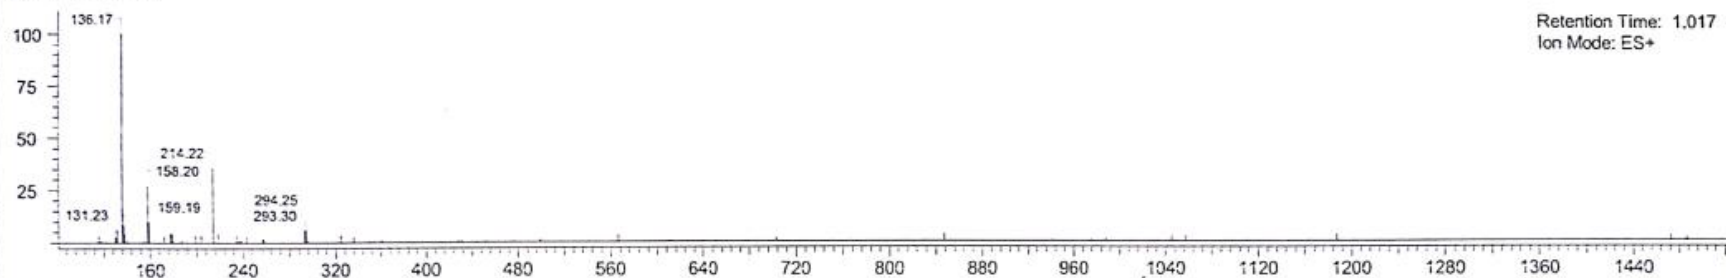

# <sup>1</sup>H NMR of 6-Bromo-4-(4-methoxyphenyl)-1,3-dihydro-2H-benzo[d]imidazol-2-one (2m)

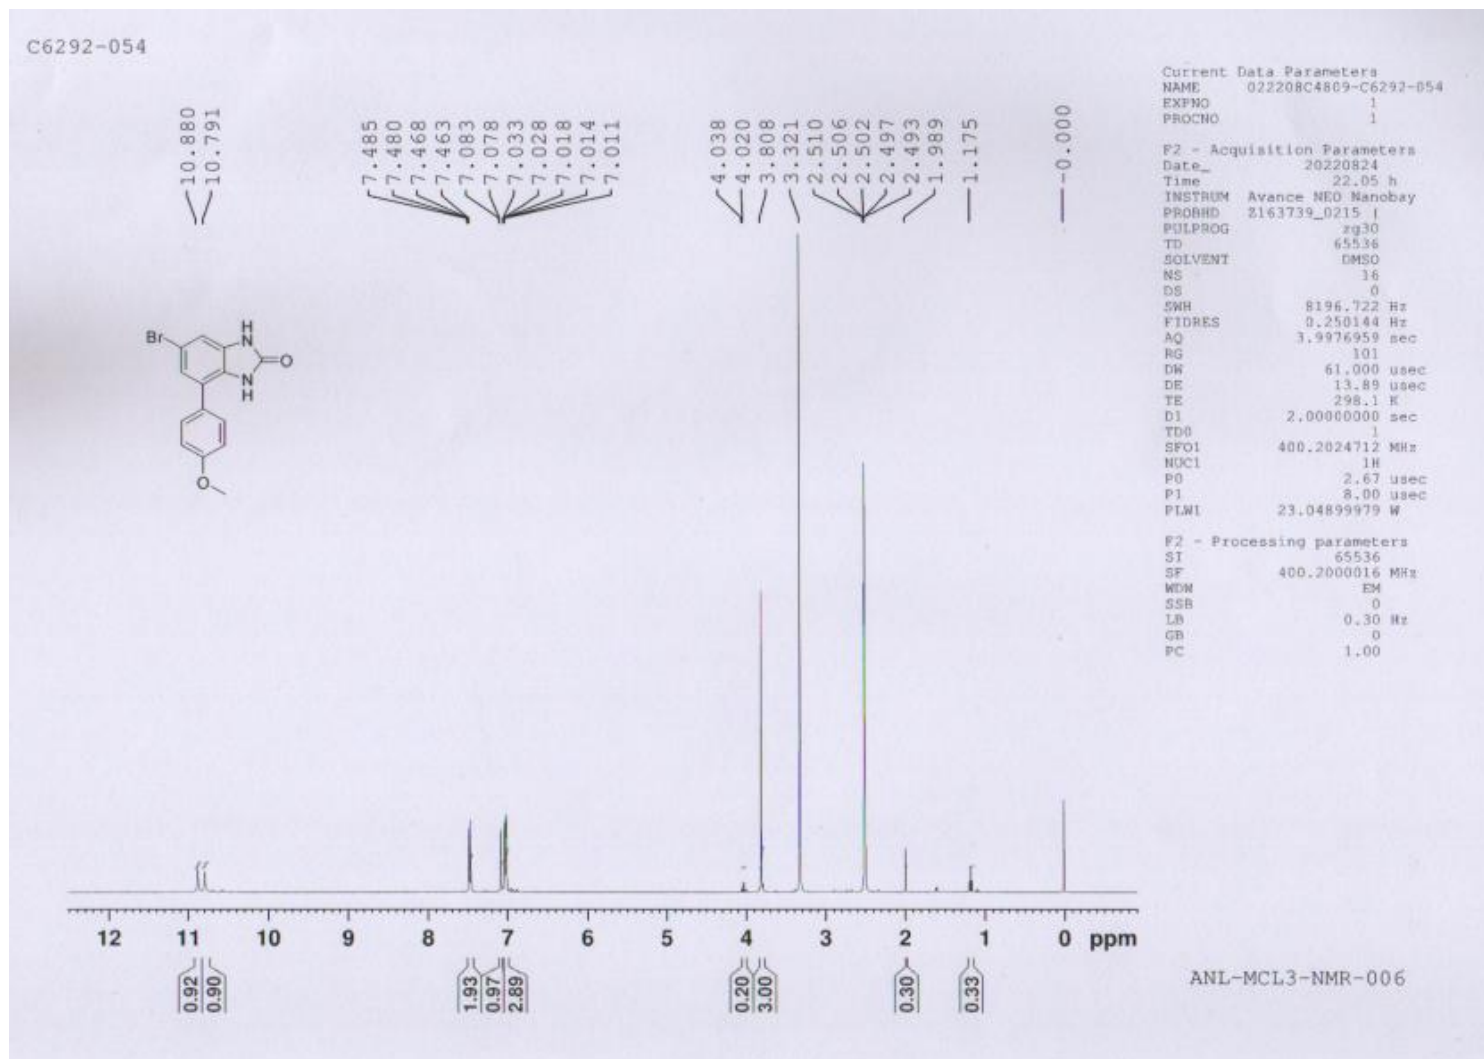

C6292-054

7.485  
7.480  
7.468  
7.463

7.083  
7.078  
7.033  
7.028  
7.018  
7.014  
7.011

Current Data Parameters  
NAME 022208C4809-C6292-054  
EXPNO 1  
PROCNO 1

F2 - Acquisition Parameters  
Date\_ 20220824  
Time 22.05 h  
INSTRUM Avance NEO Nanobay  
PROBHD Z163739\_0215 (1  
PULPROG zg30  
TD 65536  
SOLVENT DMSO  
NS 16  
DS 0  
SWH 8196.722 Hz  
FIDRES 0.250144 Hz  
AQ 3.9976959 sec  
RG 101  
DN 61.000 usec  
DE 13.89 usec  
TE 298.1 K  
D1 2.0000000 sec  
TDO 1  
SFO1 400.2024712 MHz  
NUC1 1H  
PQ 2.67 usec  
PI 8.00 usec  
PLW1 23.04899979 W

F2 - Processing parameters  
SI 65536  
SF 400.200016 MHz  
WDW EM  
SSB 0  
LB 0.30 Hz  
GB 0  
PC 1.00

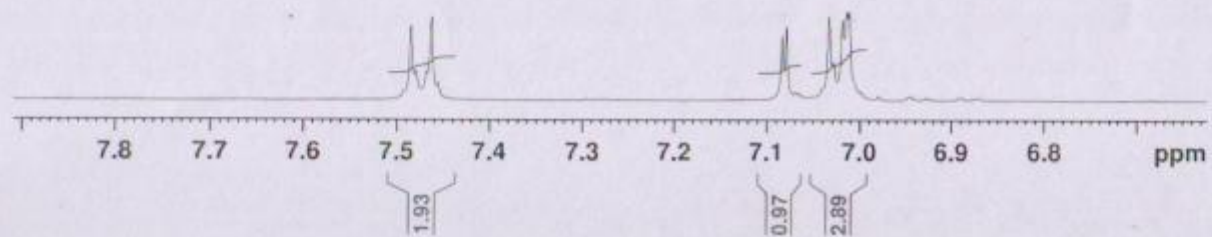

ANL-MCL3-NMR-006

C6292-054

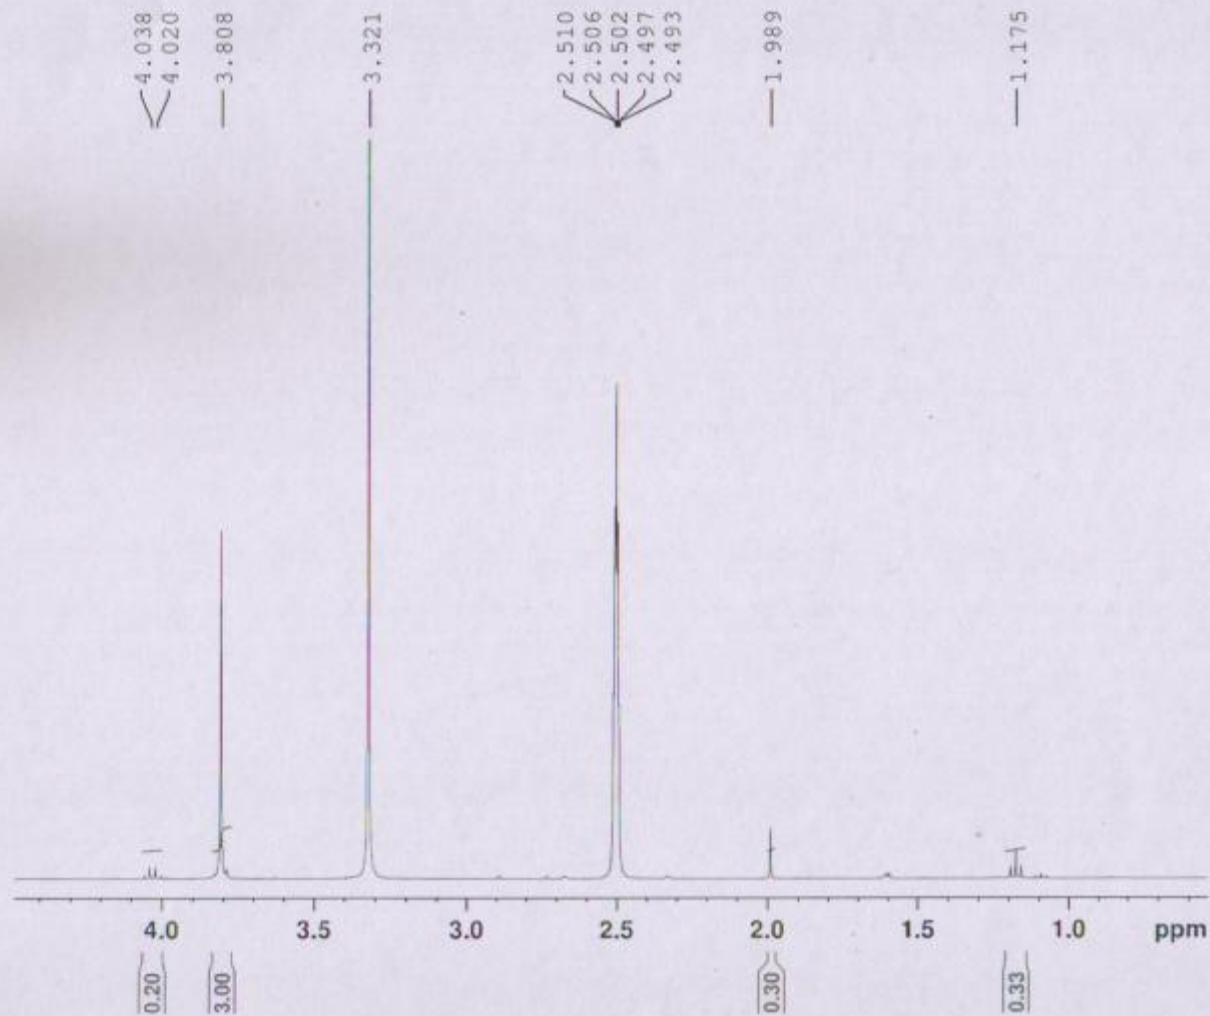

Current Data Parameters  
NAME 022208C4809-C6292-054  
EXPNO 1  
PROCNO 1

F2 - Acquisition Parameters  
Date\_ 20220824  
Time 22.05 h  
INSTRUM Avance NEO Nanobay  
PROBHD Z163739\_0215 (   
PULPROG zg30  
TD 65536  
SOLVENT DMSO  
NS 16  
DS 0  
SWH 8196.722 Hz  
FIDRES 0.250144 Hz  
AQ 3.9976959 sec  
RG 101  
DW 61.000 usec  
DE 13.89 usec  
TE 298.1 K  
D1 2.00000000 sec  
TDO 1  
SFO1 400.2024712 MHz  
NUC1 1H  
P0 2.67 usec  
P1 8.00 usec  
PLW1 23.04899979 W

F2 - Processing parameters  
SI 65536  
SF 400.2000016 MHz  
WDW EM  
SSB 0  
LB 0.30 Hz  
GB 0  
PC 1.00

ANL-MCL3-NMR-006

# 13C NMR of 6-Bromo-4-(4-methoxyphenyl)-1,3-dihydro-2H-benzo[d]imidazol-2-one (2m)

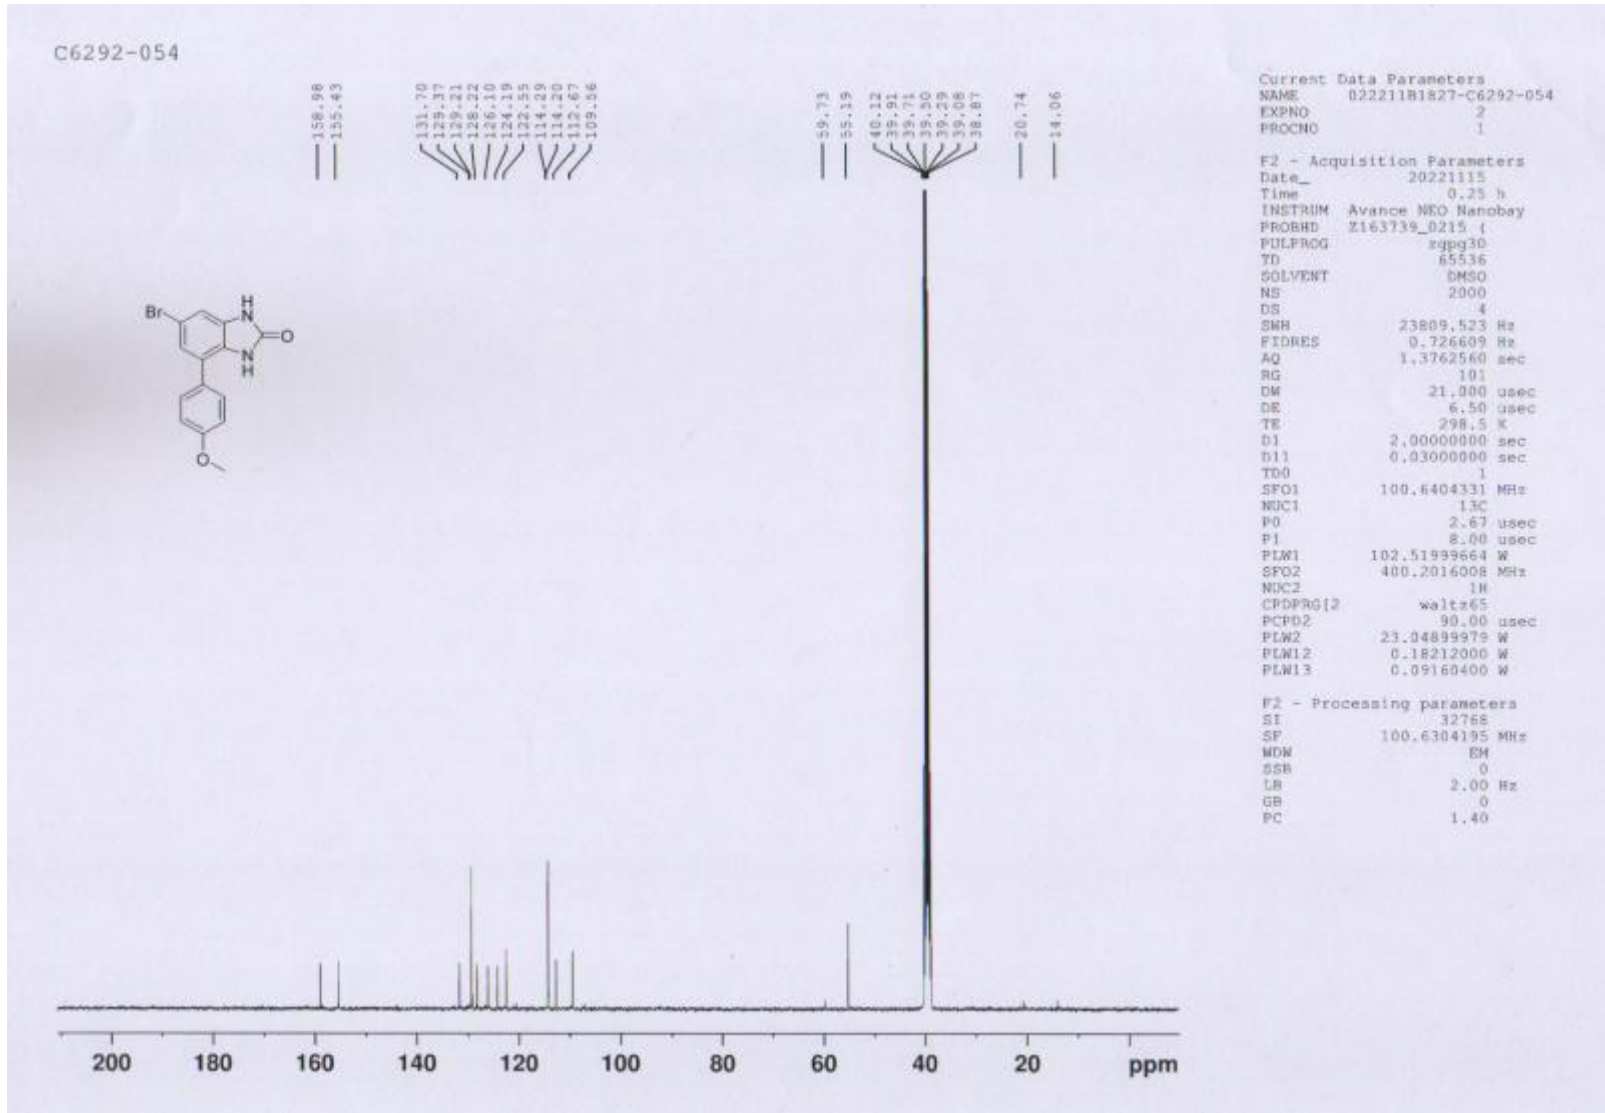



C6292-054

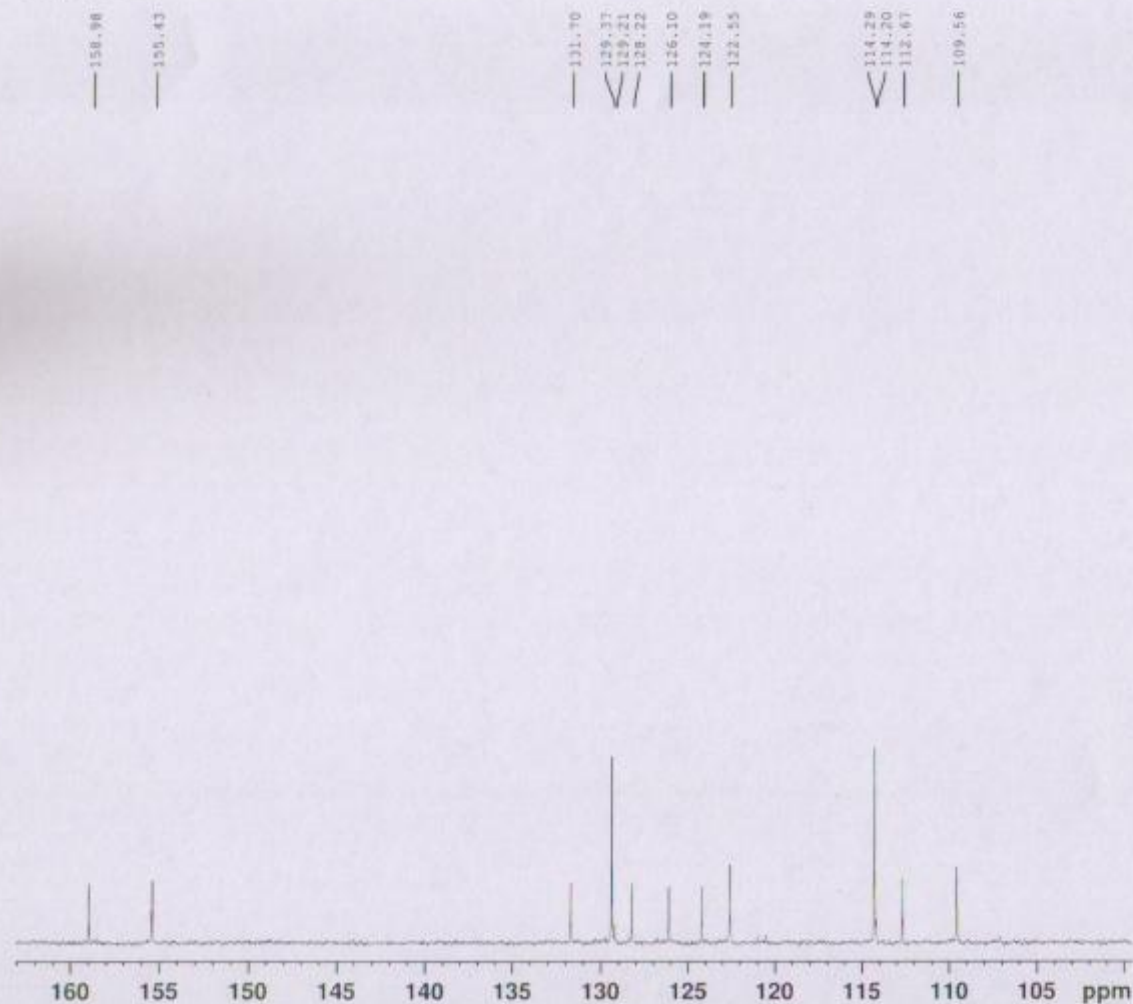

Current Data Parameters  
NAME 02221181827-C6292-054  
EXPNO 2  
PROCNO 1

F2 - Acquisition Parameters  
Date\_ 20221115  
Time 0.25 h  
INSTRUM Avance NEO Nanobay  
PROBHD X161718\_0215 1  
PULPROG zgpg30  
TD 63336  
SOLVENT DMSO  
NS 2000  
DS 4  
SWH 23809.521 Hz  
FIDRES 0.726699 Hz  
AQ 1.3762560 sec  
RG 101  
DN 21.000 usec  
DE 6.50 usec  
TE 298.5 K  
D1 2.0000000 sec  
D11 0.0300000 sec  
TDD 1  
SFO1 100.6404331 MHz  
NUC1 13C  
PO 2.67 usec  
P1 8.00 usec  
PLW1 102.51999664 W  
SFO2 400.2016008 MHz  
NUC2 1H  
CPDPRG12 waltz65  
PCPD2 90.00 usec  
PLW2 23.04895979 W  
PLW12 8.18212000 W  
PLW13 0.09160400 W

F2 - Processing parameters  
SI 32768  
SF 100.6304195 MHz  
WDW EM  
SSB 0  
LB 2.00 Hz  
GB 0  
PC 1.40

C6292-054

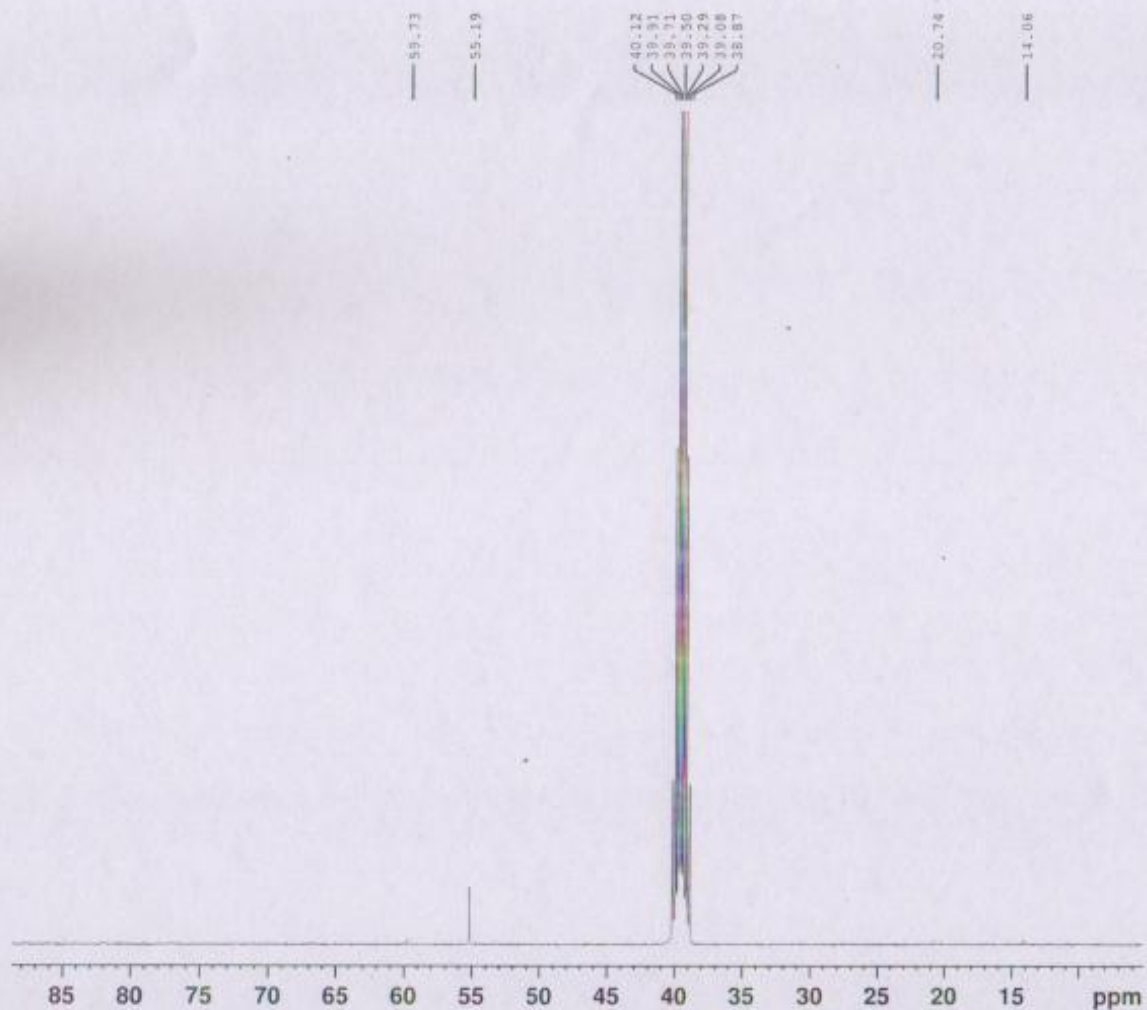

Current Data Parameters  
NAME 02221181827-C6292-054  
EXPNO 2  
PROCNO 1

F2 - Acquisition Parameters  
Date\_ 20221115  
Time 0.25 h  
INSTRUM Avance NEO Nanobay  
PROBHD 2163739\_0215 1  
PULPROG zgpg30  
TD 65536  
SOLVENT DMSO  
NS 2000  
DS 4  
SWH 23809.523 Hz  
FIDRES 0.726609 Hz  
AQ 1.3762560 sec  
RG 101  
DM 21.000 usec  
SE 6.50 usec  
TE 298.5 K  
D1 2.00000000 sec  
S11 0.03000000 sec  
TD0 1  
SFO1 100.6404331 MHz  
NUC1 13C  
PD 2.67 usec  
P1 8.00 usec  
PLW1 102.51999664 W  
SFO2 400.2016008 MHz  
NUC2 1H  
CPDPRG12 waltz65  
PCPD2 90.00 usec  
PLW2 23.04899979 W  
PLW12 0.18212000 W  
PLW13 0.09160400 W

F2 - Processing parameters  
SI 32768  
SF 100.6304195 MHz  
WDW EM  
SSB 0  
LB 2.00 Hz  
GB 0  
PC 1.40

# LCMS of 6-Bromo-4-(4-methoxyphenyl)-1,3-dihydro-2H-benzo[d]imidazol-2-one (2m)

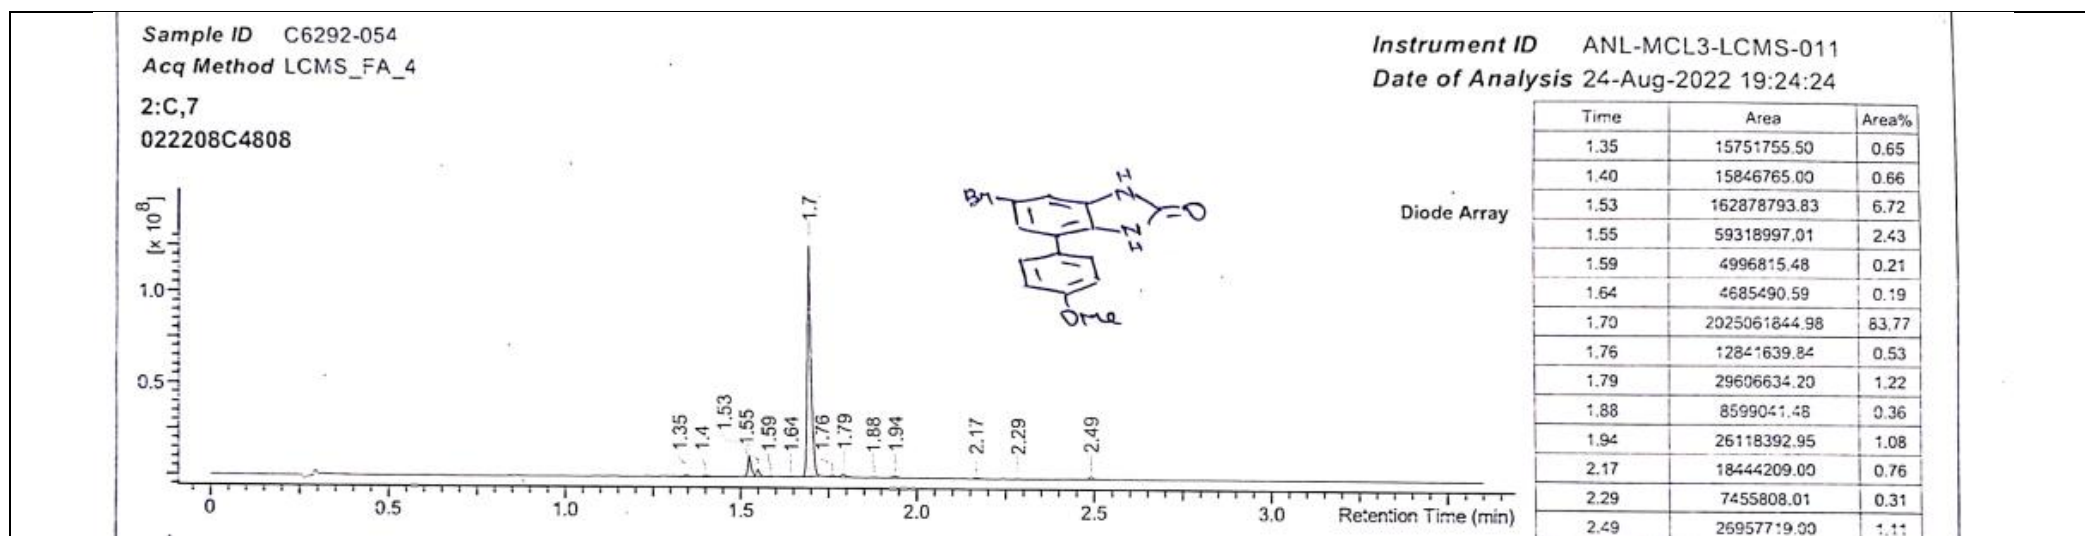

Sample ID C6292-054  
Acq Method LCMS\_FA\_4  
2:C,7  
022208C4808

Discovery Chemistry – Analytical Services

Instrument ID ANL-MCL3-LCMS-011  
Date of Analysis 24-Aug-2022 19:24:24

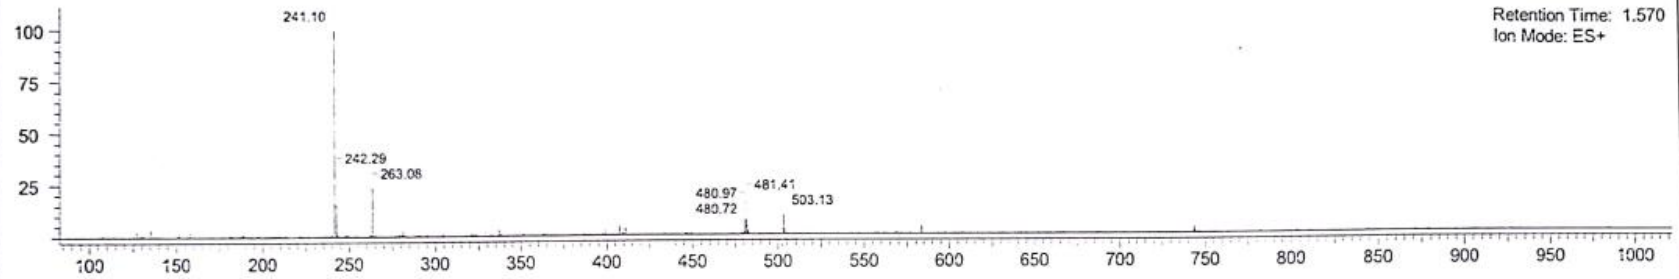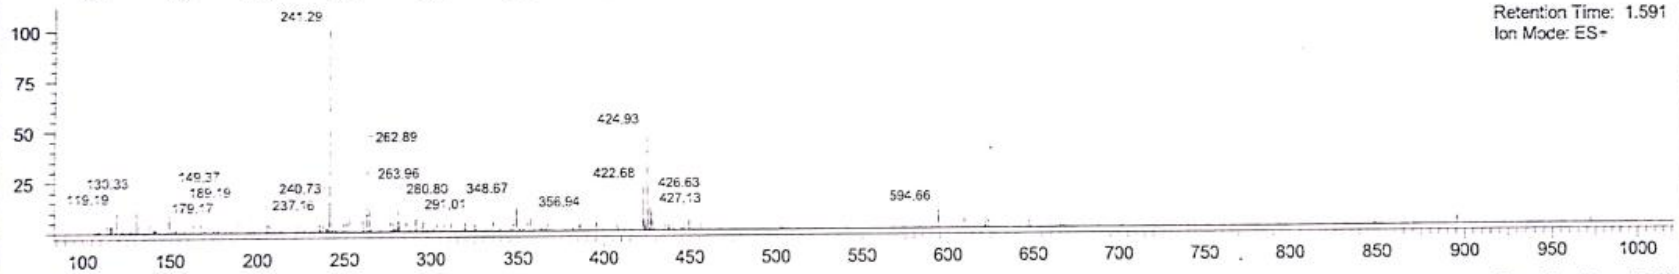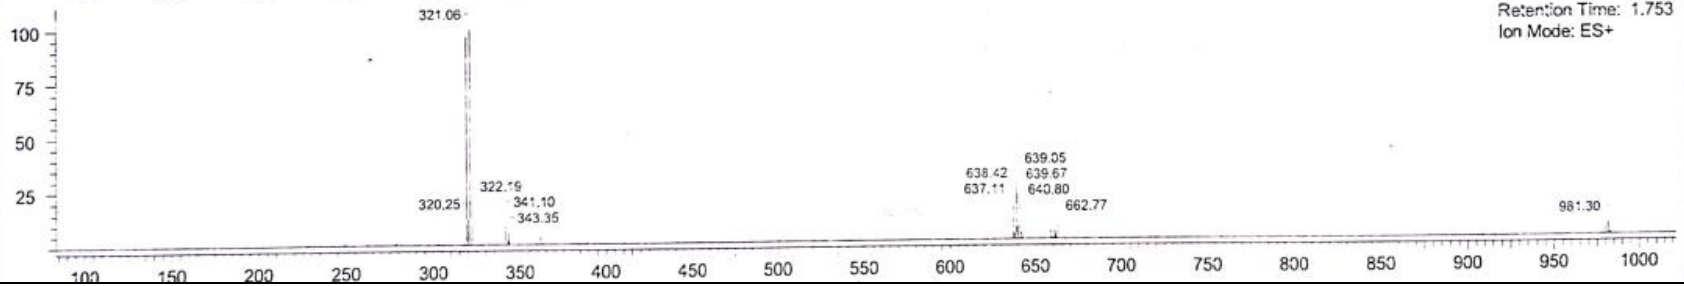

# <sup>1</sup>H NMR of 2-benzoxazolone (2p)

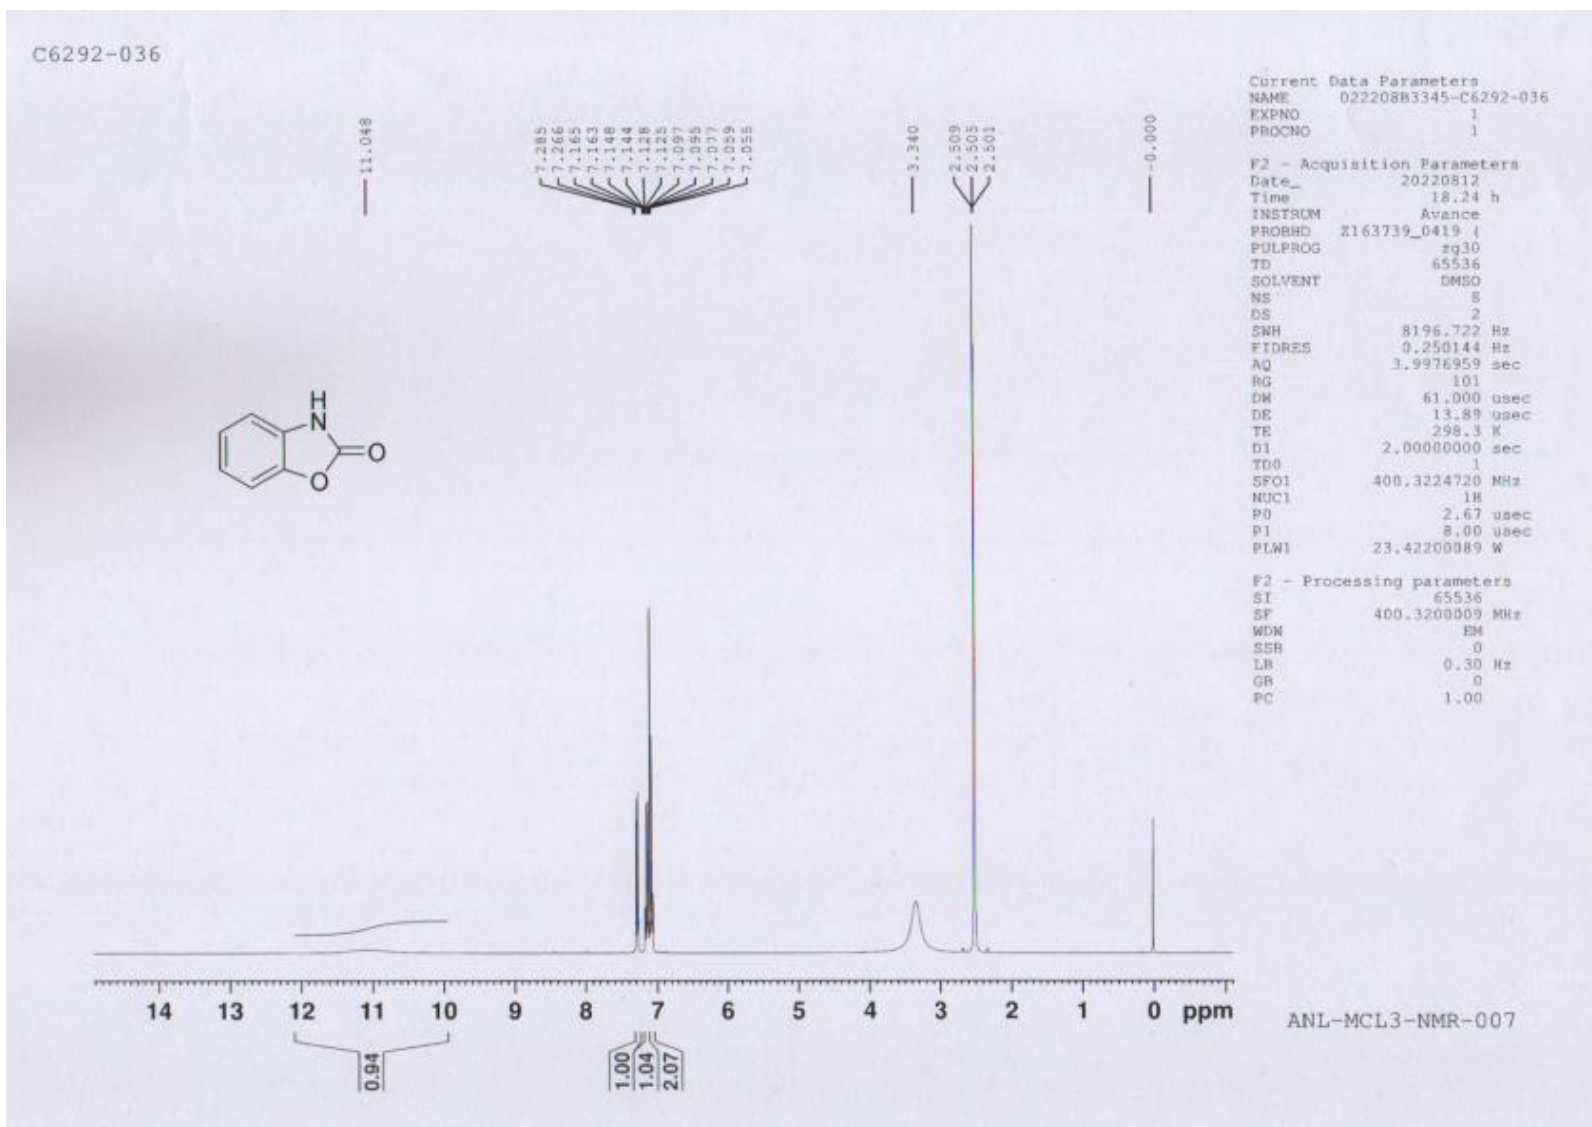

C6292-036

7.285  
7.266  
7.165  
7.163  
7.148  
7.148  
7.128  
7.125  
7.097  
7.095  
7.077  
7.059  
7.055

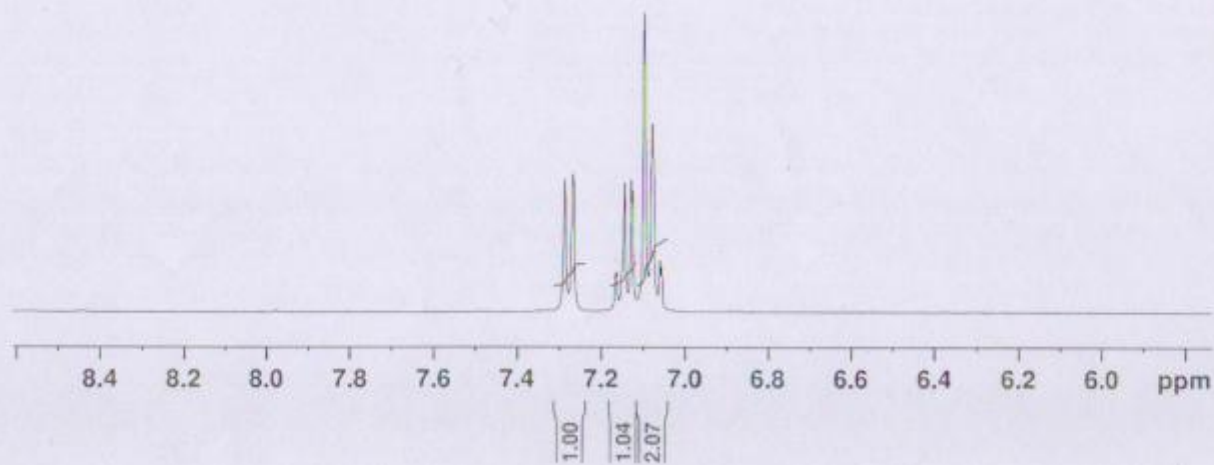

Current Data Parameters  
NAME 022208B3345-C6292-036  
EXPNO 1  
PROCNO 1

F2 - Acquisition Parameters  
Date\_ 20220812  
Time 18.24 h  
INSTRUM Avance  
PROBHD Z163739\_0419 1  
PULPROG zg30  
TD 65536  
SOLVENT DMSO  
NS 8  
DS 2  
SMH 8196.722 Hz  
FIDRES 0.250144 Hz  
AQ 3.9976959 sec  
RG 101  
DM 61.000 usec  
DE 13.89 usec  
TE 298.3 K  
D1 2.00000000 sec  
TDO 1  
SFO1 400.3224720 MHz  
NUC1 1H  
P0 2.67 usec  
P1 8.00 usec  
PLW1 23.42200089 W

F2 - Processing parameters  
SI 65536  
SF 400.3200009 MHz  
WDW EM  
SSB 0  
LB 0.30 Hz  
GB 0  
PC 1.00

ANL-MCL3-NMR-007

# <sup>13</sup>C NMR of 2-benzoxazolone (2p)

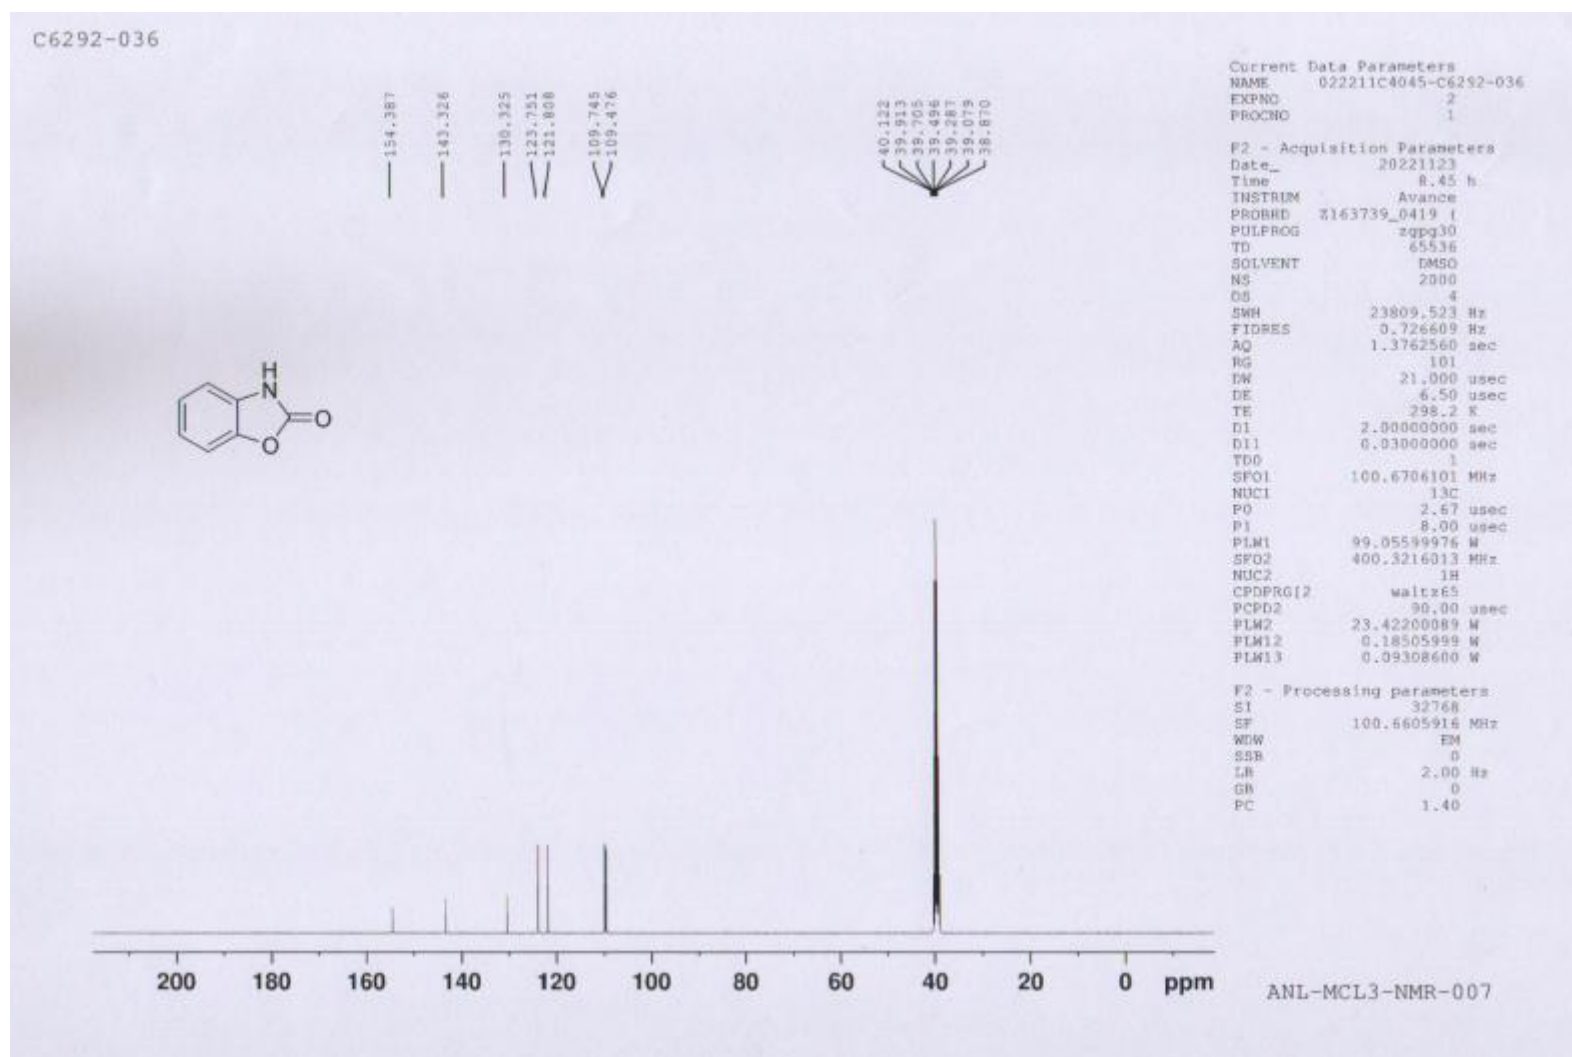

C6292-036

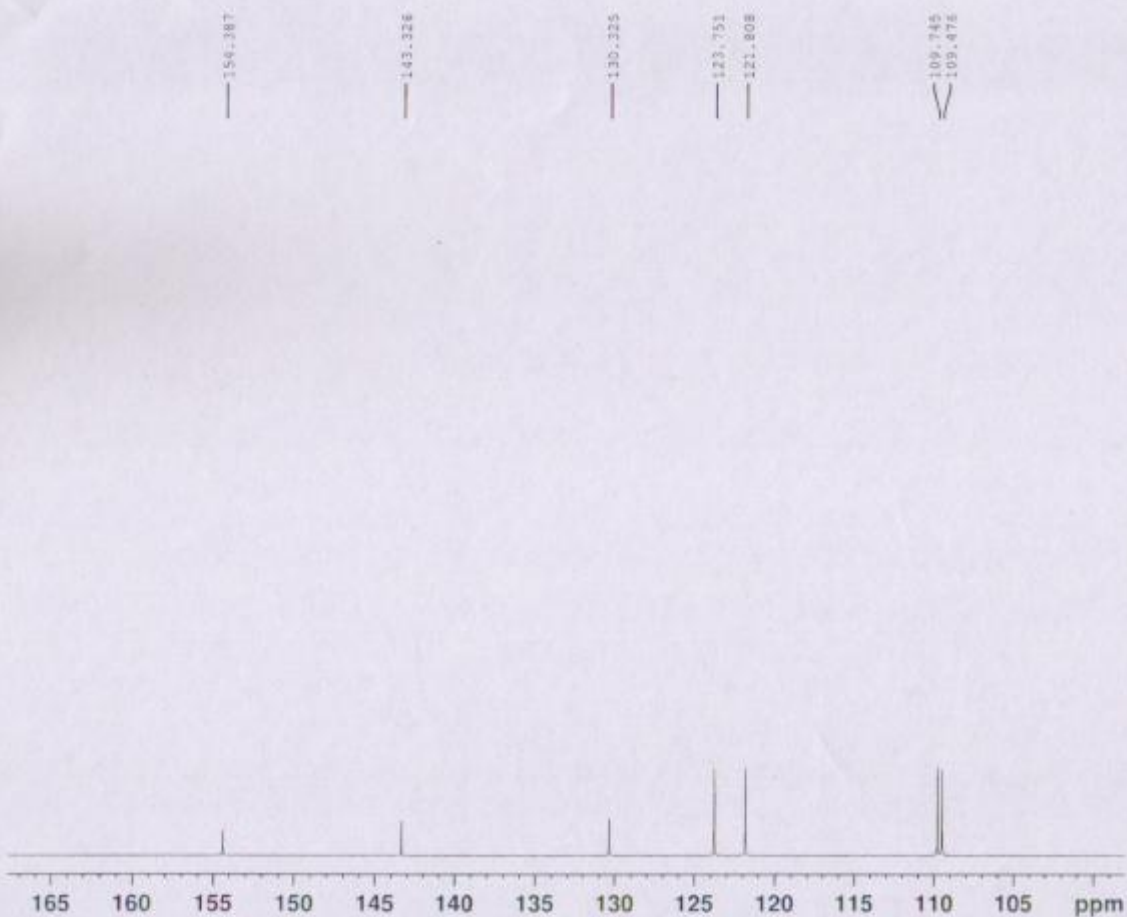

Current Data Parameters  
NAME 022211C4045-C6292-036  
EXPNO 2  
PROCNO 1

F2 - Acquisition Parameters  
Date\_ 20221123  
Time 8.45 h  
INSTRUM Avance  
PROBHD Z163739\_0419 (4  
PULPROG zgpg30  
TD 65536  
SOLVENT DMSO  
NS 2000  
DS 4  
SWH 23809.521 Hz  
FIDRES 0.726609 Hz  
AQ 1.1762560 sec  
RG 101  
DM 21.000 usec  
DE 6.50 usec  
TE 298.2 K  
D1 2.00000000 sec  
D11 0.03000000 sec  
TDO 1  
SFO1 100.6706101 MHz  
NUC1 13C  
P0 2.67 usec  
P1 8.00 usec  
PLW1 99.05599976 W  
SFO2 400.3216013 MHz  
NUC2 1H  
CPDPRG2 waltz65  
PCPD2 90.00 usec  
PLW2 23.42200089 W  
PLW12 0.18505999 W  
PLW13 0.09308600 W

F2 - Processing parameters  
SI 32768  
SF 100.6605916 MHz  
WDW EM  
SSB 0  
LB 2.00 Hz  
GB 0  
PC 1.40

ANL-MCL3-NMR-007



# LCMS of 2-benzoxazolone (2p)

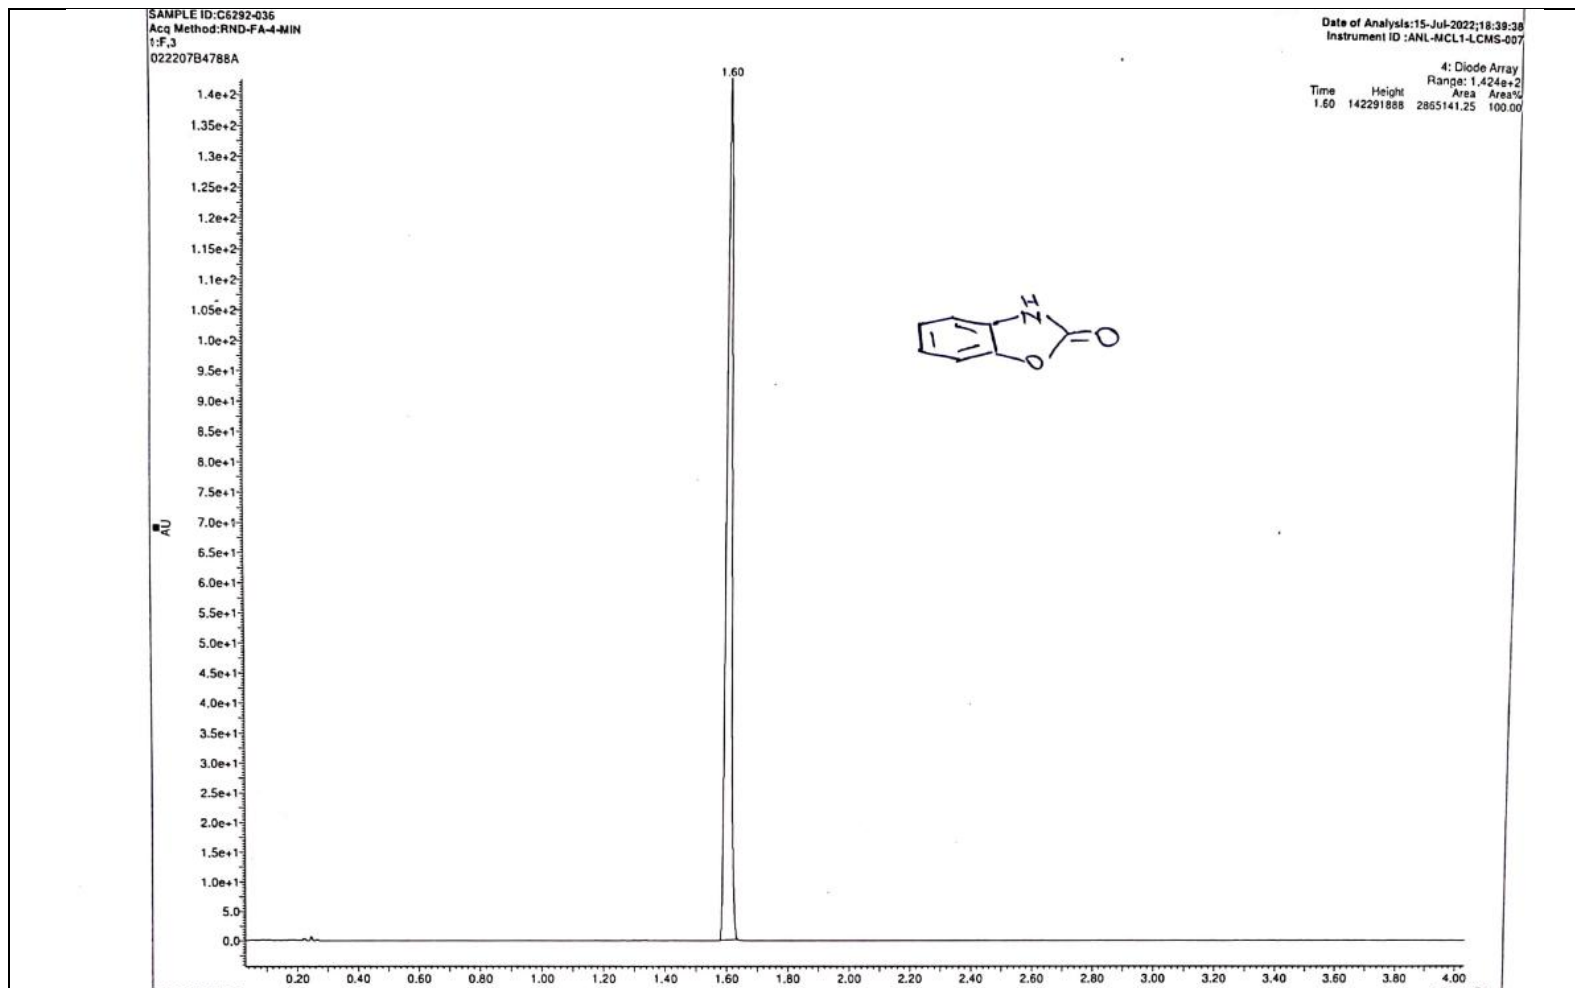

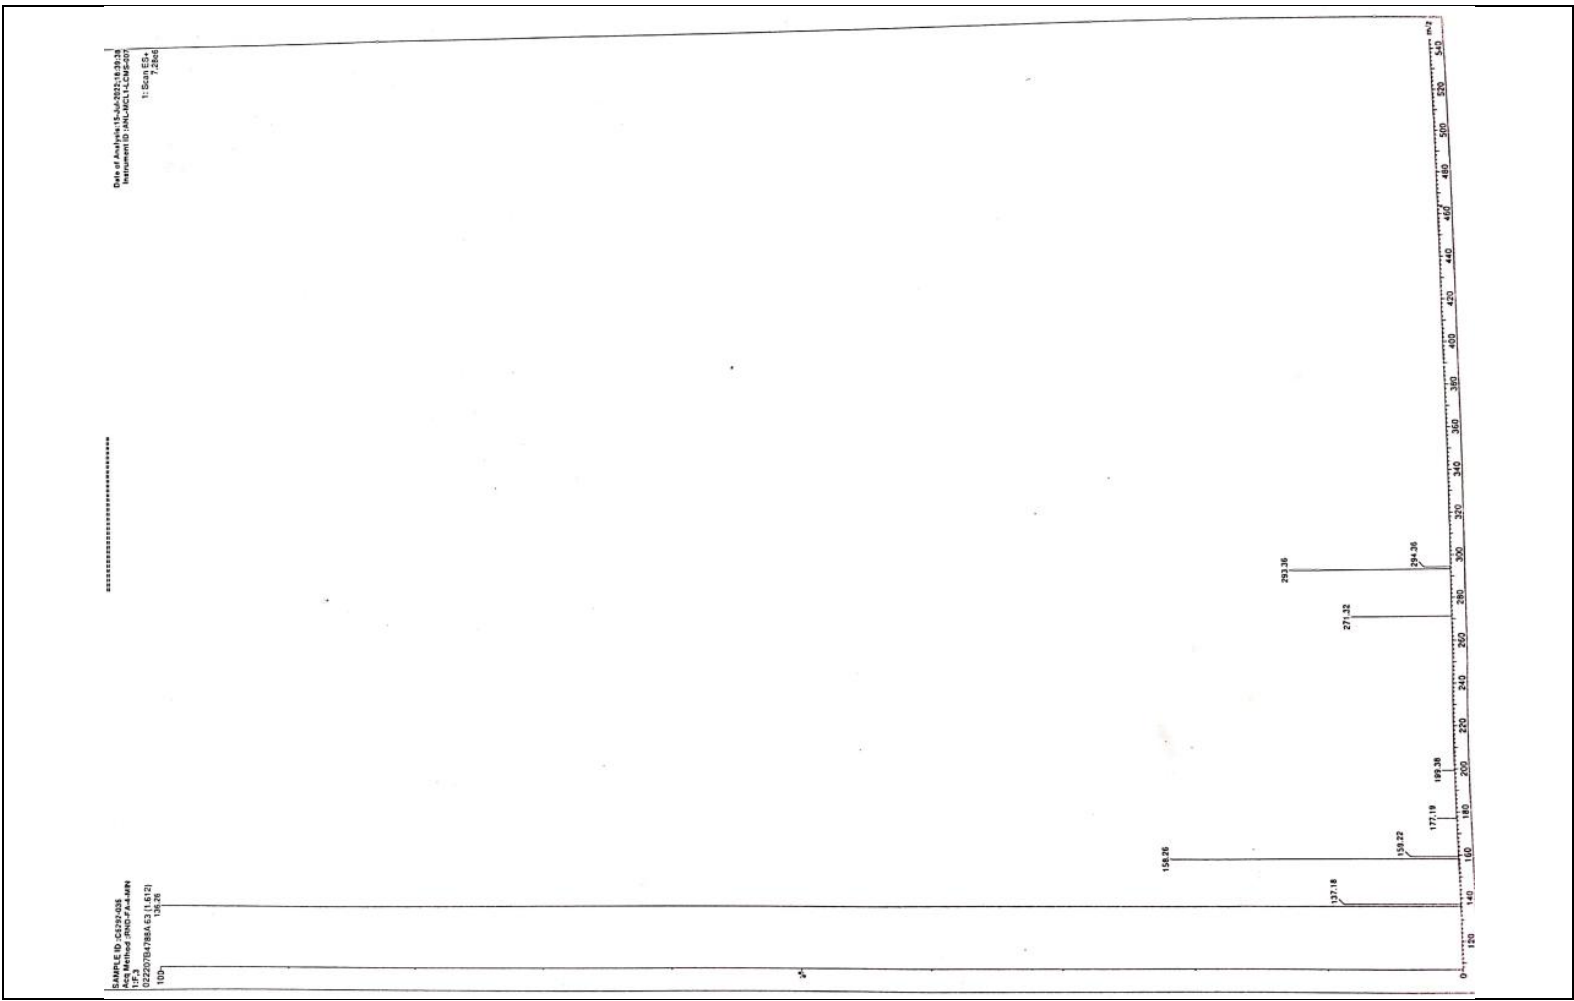

# <sup>1</sup>H NMR of 5-Chlorobenzo[d]oxazol-2(3H)-one (2q)

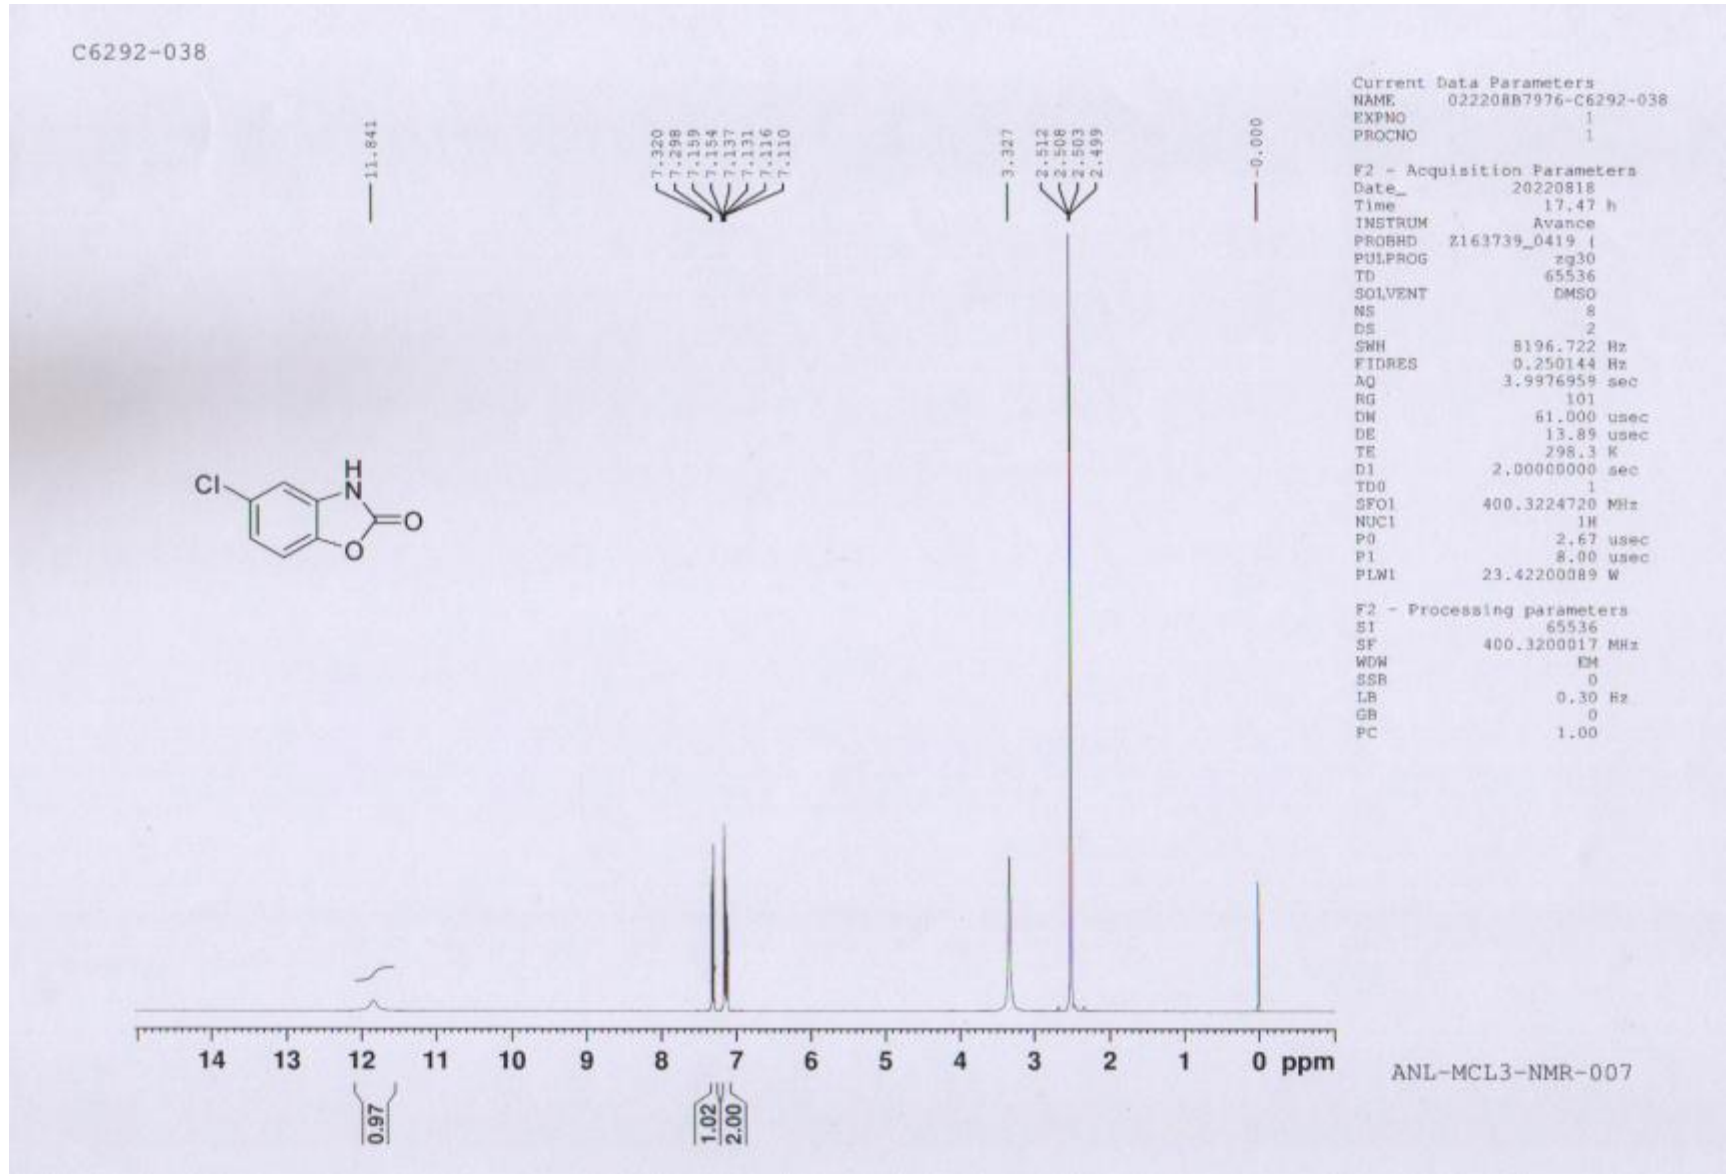

C6292-038

7.320  
7.298  
7.158  
7.154  
7.150  
7.146  
7.142  
7.140

Current Data Parameters  
NAME 022208B7976-C6292-038  
EXPNO 1  
PROCNO 1

F2 - Acquisition Parameters  
Date\_ 20220818  
Time 17.47 h  
INSTRUM Avance  
PROBRD W161739\_0419 f  
PULPROG zg30  
TD 65536  
SOLVENT DMSO  
NS 8  
DS 2  
SWH 8196.722 Hz  
FIDRES 0.250144 Hz  
AQ 3.9974959 sec  
RG 101  
DW 61.000 usec  
DE 13.89 usec  
TE 298.3 K  
D1 2.0000000 sec  
TDO 1  
SFO1 400.3224720 MHz  
NUC1 1H  
P0 2.67 usec  
P1 8.00 usec  
PLW1 23.42200089 W

F2 - Processing parameters  
SI 65536  
SF 400.3200017 MHz  
WDM EM  
SSB 0  
LB 0.30 Hz  
GB 0  
PC 1.00

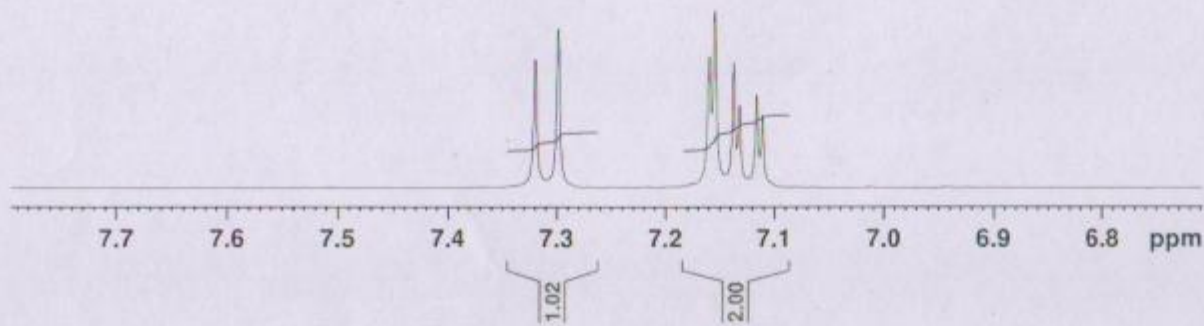

ANL-MCL3-NMR-007

# <sup>13</sup>C NMR of 5-Chlorobenzo[d]oxazol-2(3H)-one (2q)

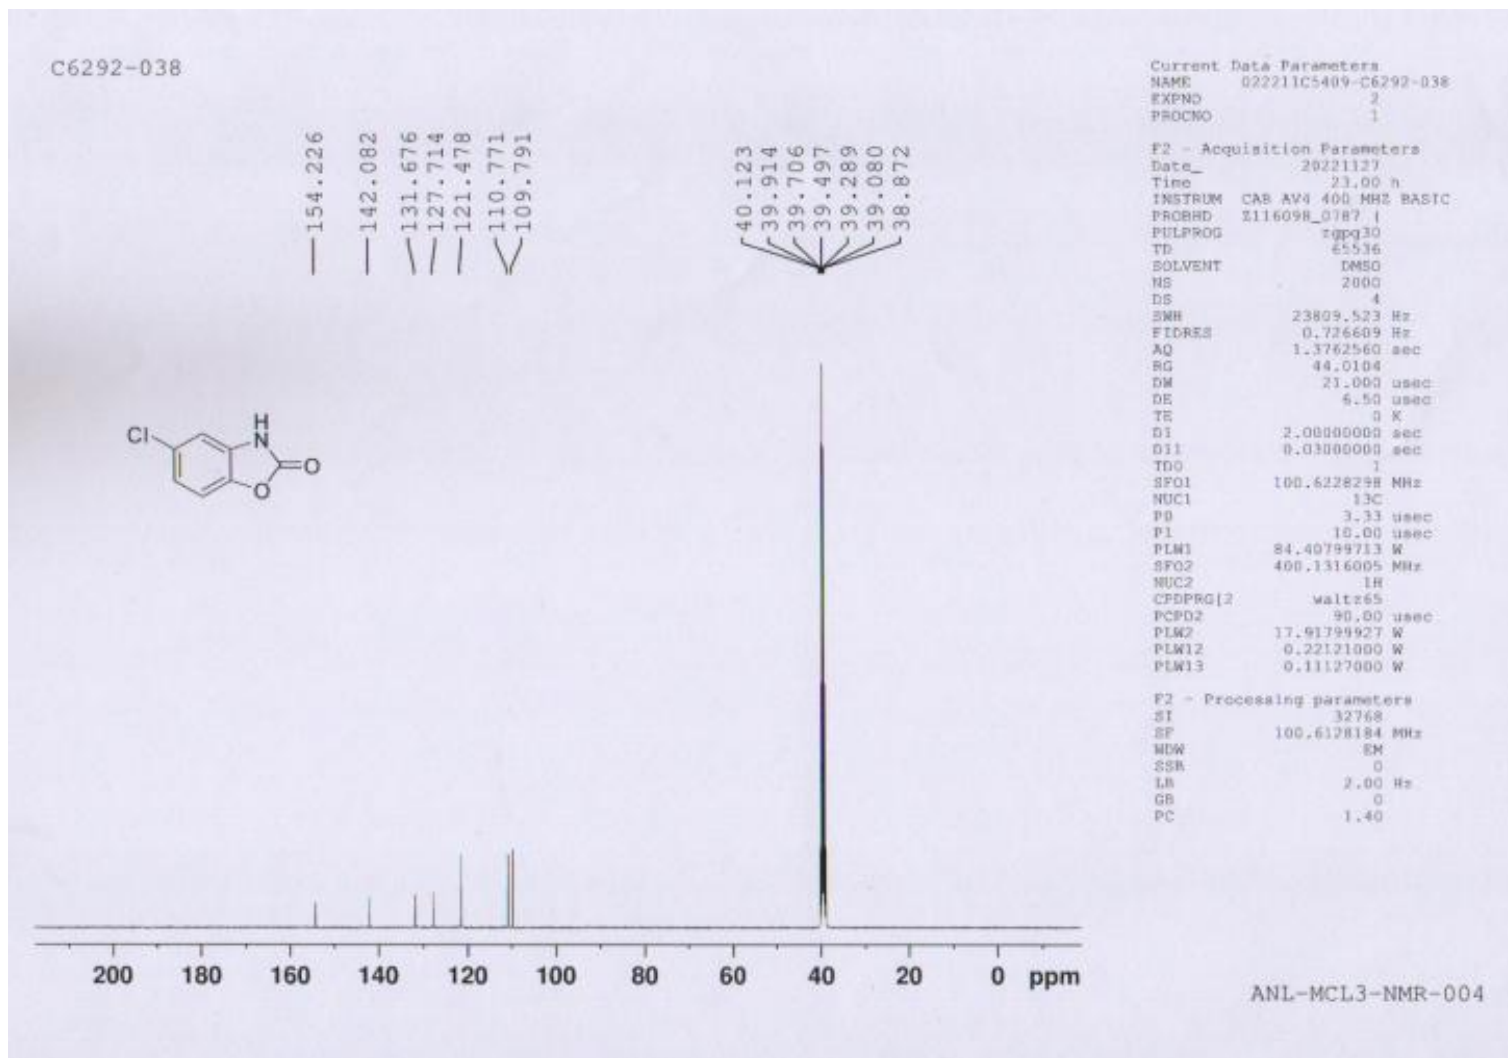

C6292-038

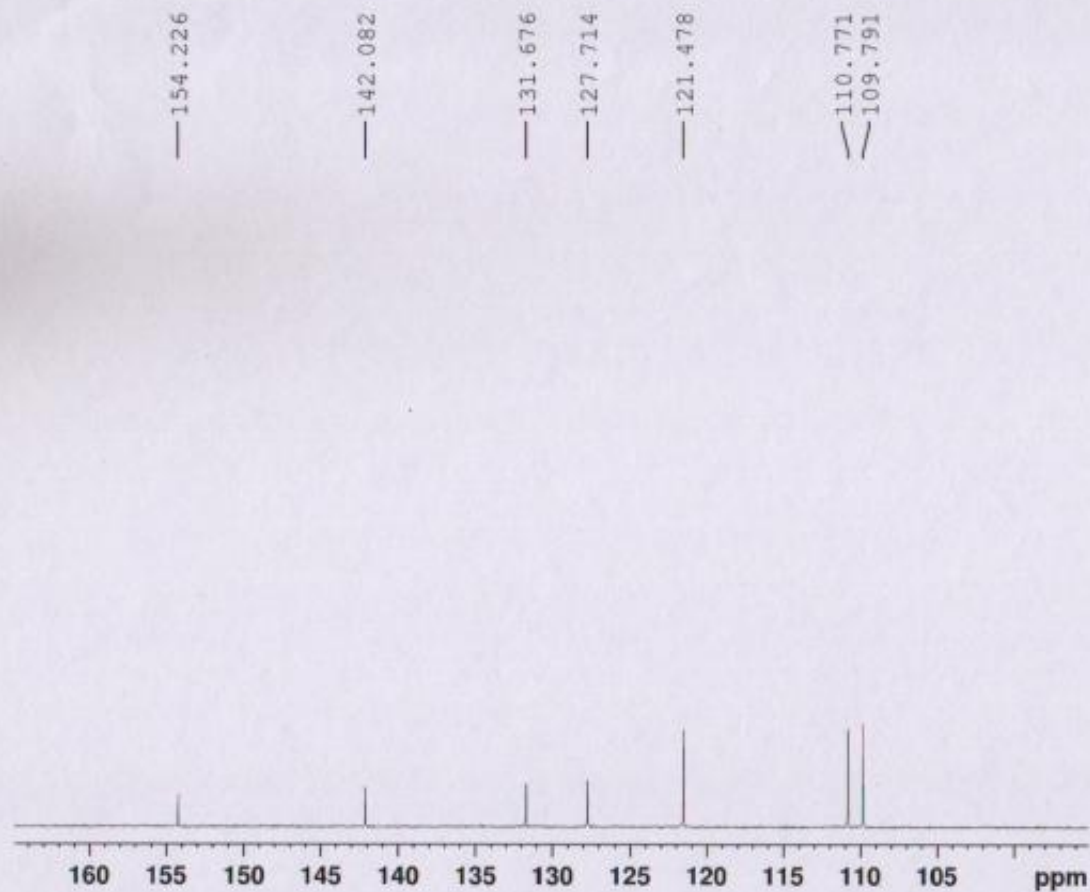

Current Data Parameters  
NAME 022211C5409-C6292-038  
EXPNO 2  
PROCNO 1

F2 - Acquisition Parameters  
Date\_ 20221127  
Time 23.00 h  
INSTRUM CAB AV4 400-MHZ BASIC  
PROBHD E116096\_0787 i  
PULPROG zgpg30  
TD 65536  
SOLVENT DMSO  
NS 2000  
DS 4  
SWH 23809.523 Hz  
FIDRES 0.726609 Hz  
AQ 1.3762560 sec  
RG 44.0104  
DM 21.000 usec  
DE 6.50 usec  
TE 0 K  
D1 2.0000000 sec  
D11 0.0100000 sec  
TDC 1  
SFO1 100.6228298 MHz  
NUC1 13C  
P0 3.33 usec  
P1 10.00 usec  
PLW1 84.40799713 W  
SFO2 400.1316005 MHz  
NUC2 1H  
PCPDPC12 waltz65  
PCPD2 90.00 usec  
PLW2 17.91799927 W  
PLW12 0.22121000 W  
PLW13 0.11127000 W

F2 - Processing parameters  
S1 32768  
SF 100.6128184 MHz  
WDW EM  
SSB 0  
LB 2.00 Hz  
GB 0  
PC 1.40

ANL-MCL3-NMR-004

# LCMS of 5-Chlorobenzo[d]oxazol-2(3H)-one (2q)

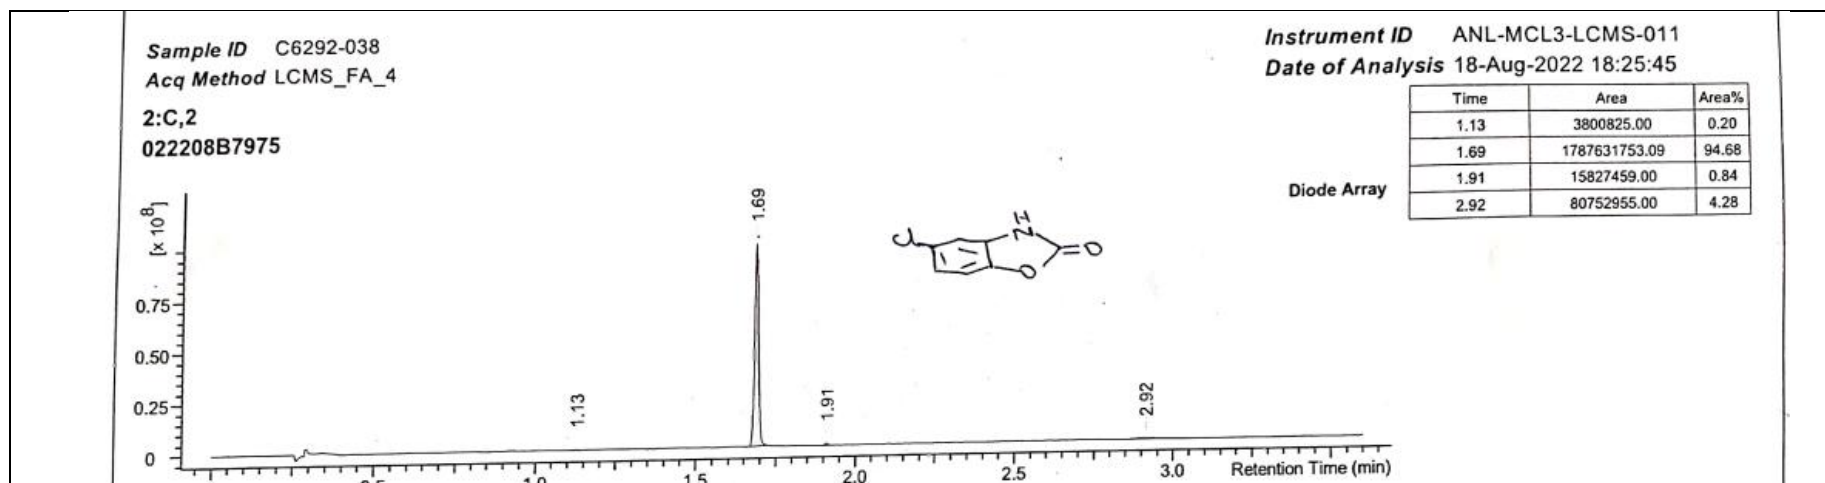

Sample ID C6292-038  
Acq Method LCMS\_FA\_4  
2:C,2  
022208B7975

Discovery Chemistry – Analytical Services

Instrument ID ANL-MCL3-LCMS-011  
Date of Analysis 18-Aug-2022 18:25:45

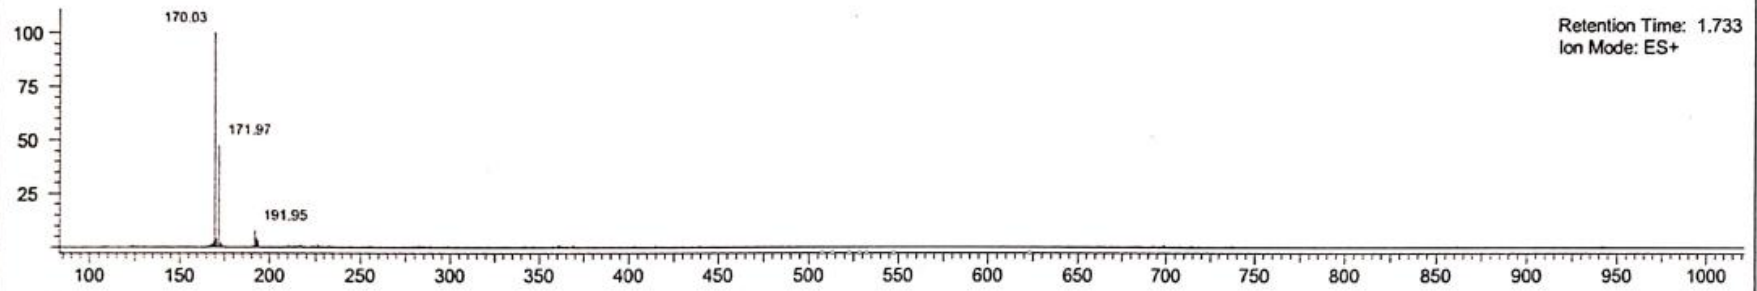



# <sup>1</sup>H NMR of 5-Bromobenzo[d]oxazol-2(3H)-one (2r)

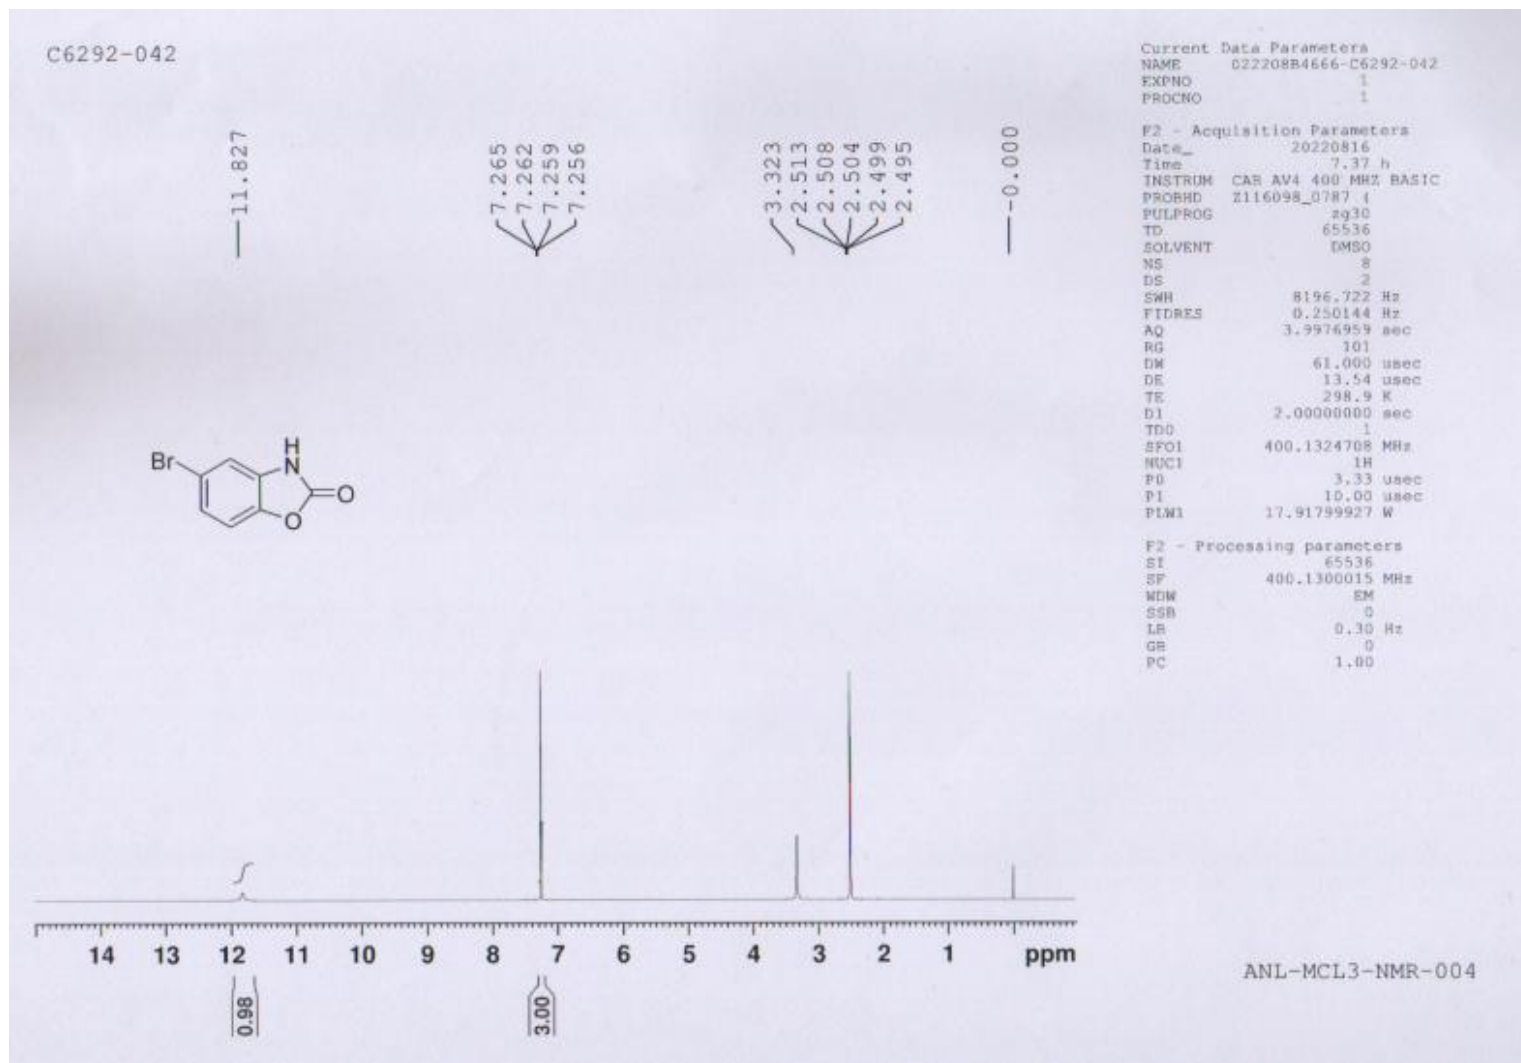

ANL-MCL3-NMR-004

C6292-042

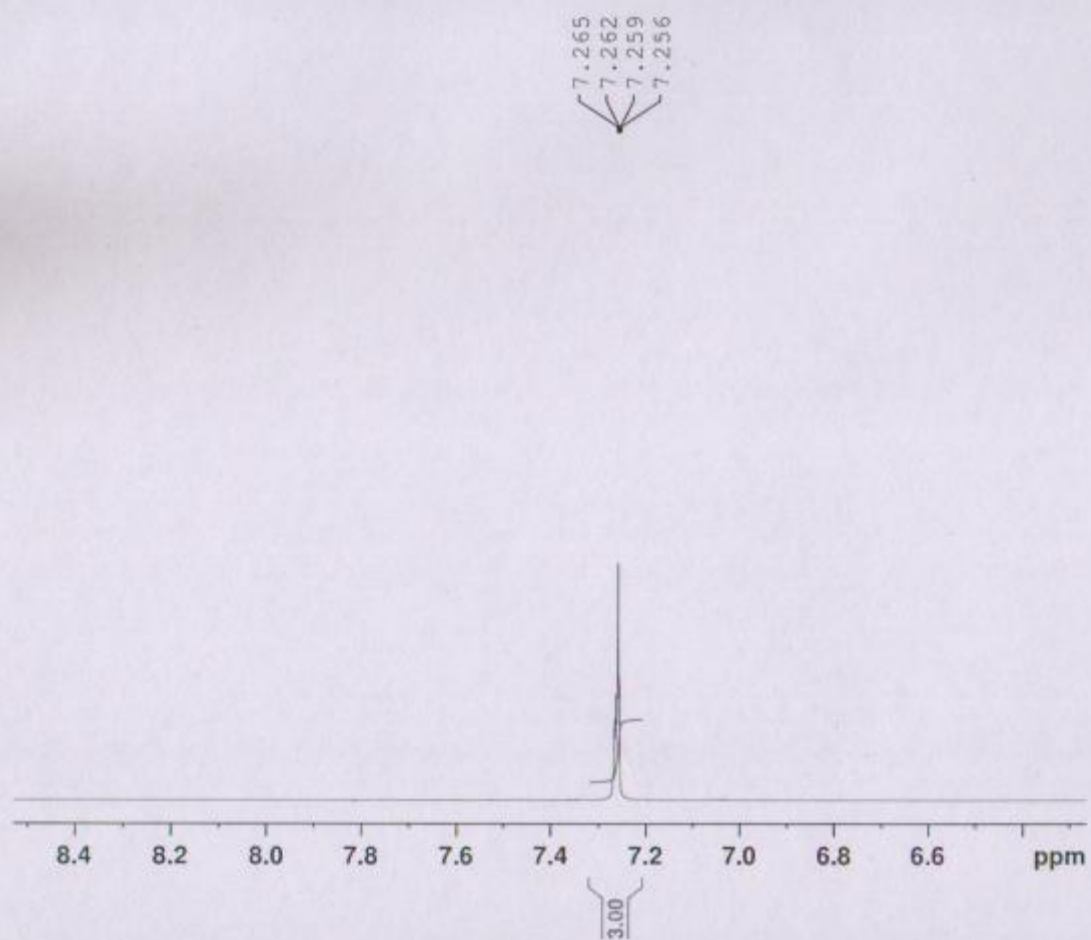

Current Data Parameters  
NAME 022208B4666-C6292-042  
EXPNO 1  
PROCNO 1

F2 - Acquisition Parameters  
Date\_ 20220816  
Time 7.37 h  
INSTRUM CAB AV4 400 MHz BASIC  
PROBHD S116098\_0787 (1  
PULPROG zg30  
TD 65536  
SOLVENT DMSO  
NS 8  
DS 2  
SWH 8196.722 Hz  
FIDRES 0.250144 Hz  
AQ 3.9976959 sec  
RG 101  
DW 61.000 usec  
DE 13.54 usec  
TE 298.9 K  
D1 2.00000000 sec  
TDC 1  
SFO1 400.1324708 MHz  
NUC1 1H  
PQ 3.33 usec  
PI 10.00 usec  
PLW1 17.91799927 W

F2 - Processing parameters  
SI 65536  
SF 400.1300015 MHz  
WDW EM  
SSB 0  
LB 0.30 Hz  
GB 0  
PC 1.00

ANL-MCL3-NMR-004



C6292-042

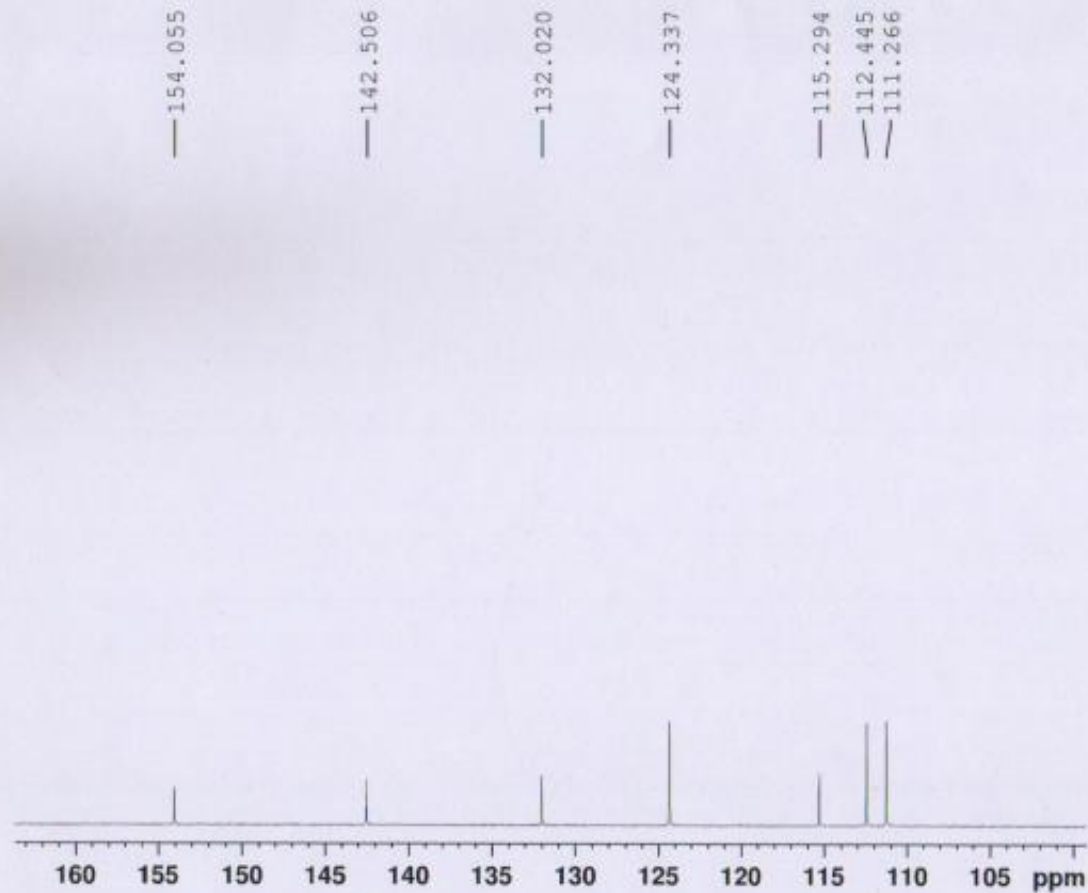

Current Data Parameters  
NAME 022211C5405-C6292-042  
EXPNO 2  
PROCNO 1

F2 - Acquisition Parameters  
Date\_ 20221128  
Time 0.58 h  
INSTRUM CAB AV4 400-MHZ BASIC  
PROBHD X116098\_0787 4  
PULPROG zgpg30  
TD 45536  
SOLVENT DMSO  
NS 2000  
DS 4  
SWH 23809.523 Hz  
FIDRES 0.726609 Hz  
AQ 1.3762560 sec  
RG 40.625  
DW 21.000 usec  
DE 6.50 usec  
TE 0 K  
D1 2.00000000 sec  
D11 0.03000000 sec  
TD0 1  
SFO1 100.6228298 MHz  
NUC1 13C  
P0 3.33 usec  
P1 10.00 usec  
PLW1 84.40799713 W  
SFO2 400.1316005 MHz  
NUC2 1H  
CPDPRG12 waltz155  
PCPD2 90.00 usec  
PLW2 17.91799927 W  
PLW12 0.22121000 W  
PLW13 0.11127000 W

F2 - Processing parameters  
SI 32768  
SF 100.6128185 MHz  
WDW EM  
SSB 0  
LB 2.00 Hz  
GB 0  
PC 1.40

ANL-MCL3-NMR-004

# LCMS of 5-Bromobenzo[d]oxazol-2(3H)-one (2r)

Sample ID C6292-042  
Acq Method LCMS\_FA\_4  
1:A,6  
022208B4665

Instrument ID ANL-MCL3-LCMS-011  
Date of Analysis 16-Aug-2022 08:33:07

| Time | Area          | Area% |
|------|---------------|-------|
| 1.73 | 1334304723.00 | 94.23 |
| 1.99 | 5825751.67    | 0.41  |
| 2.71 | 51307921.13   | 3.62  |
| 2.86 | 24568117.08   | 1.73  |

Diode Array

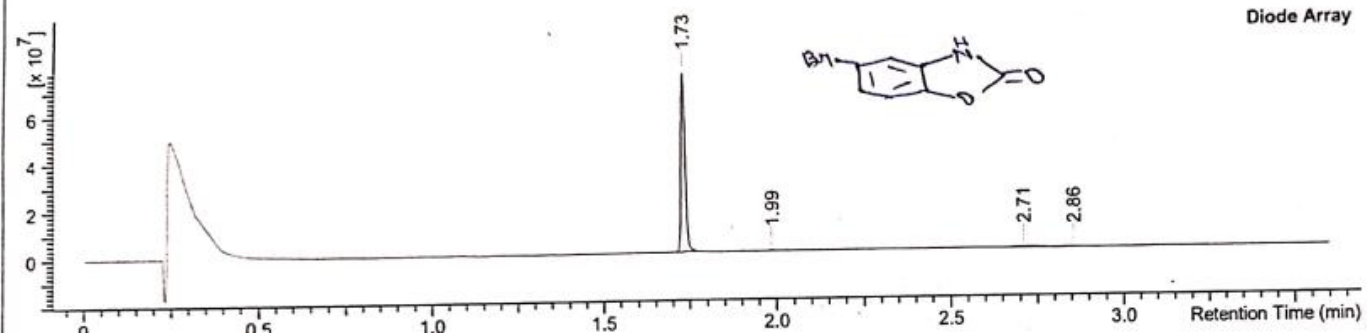

Sample ID C629Z-04Z

Acq Method LCMS\_FA\_4

1:A,6

022208B4665

Instrument ID ANL-MCL3-LCMS-011

Date of Analysis 16-Aug-2022 08:33:07

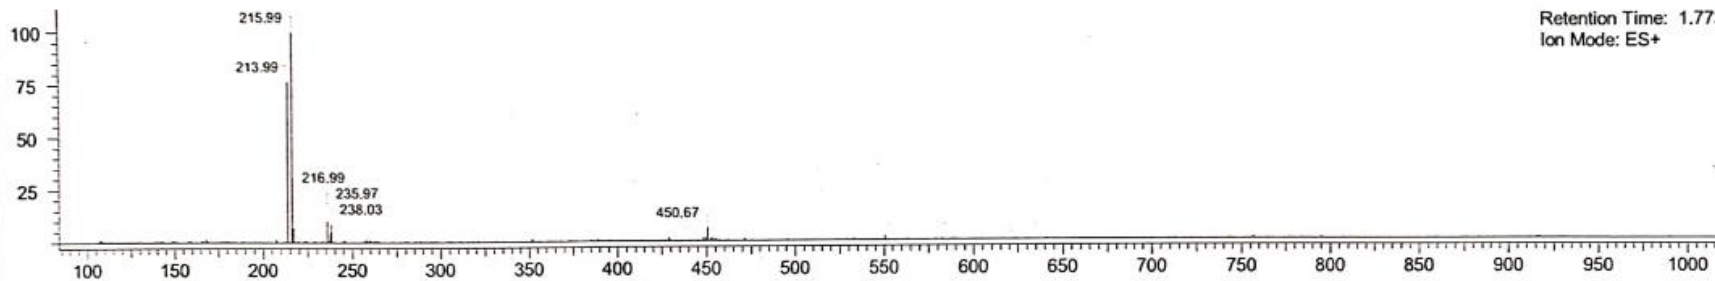

# <sup>1</sup>H NMR of 5-Fluorobenzo[d]oxazol-2(3H)-one (2s)

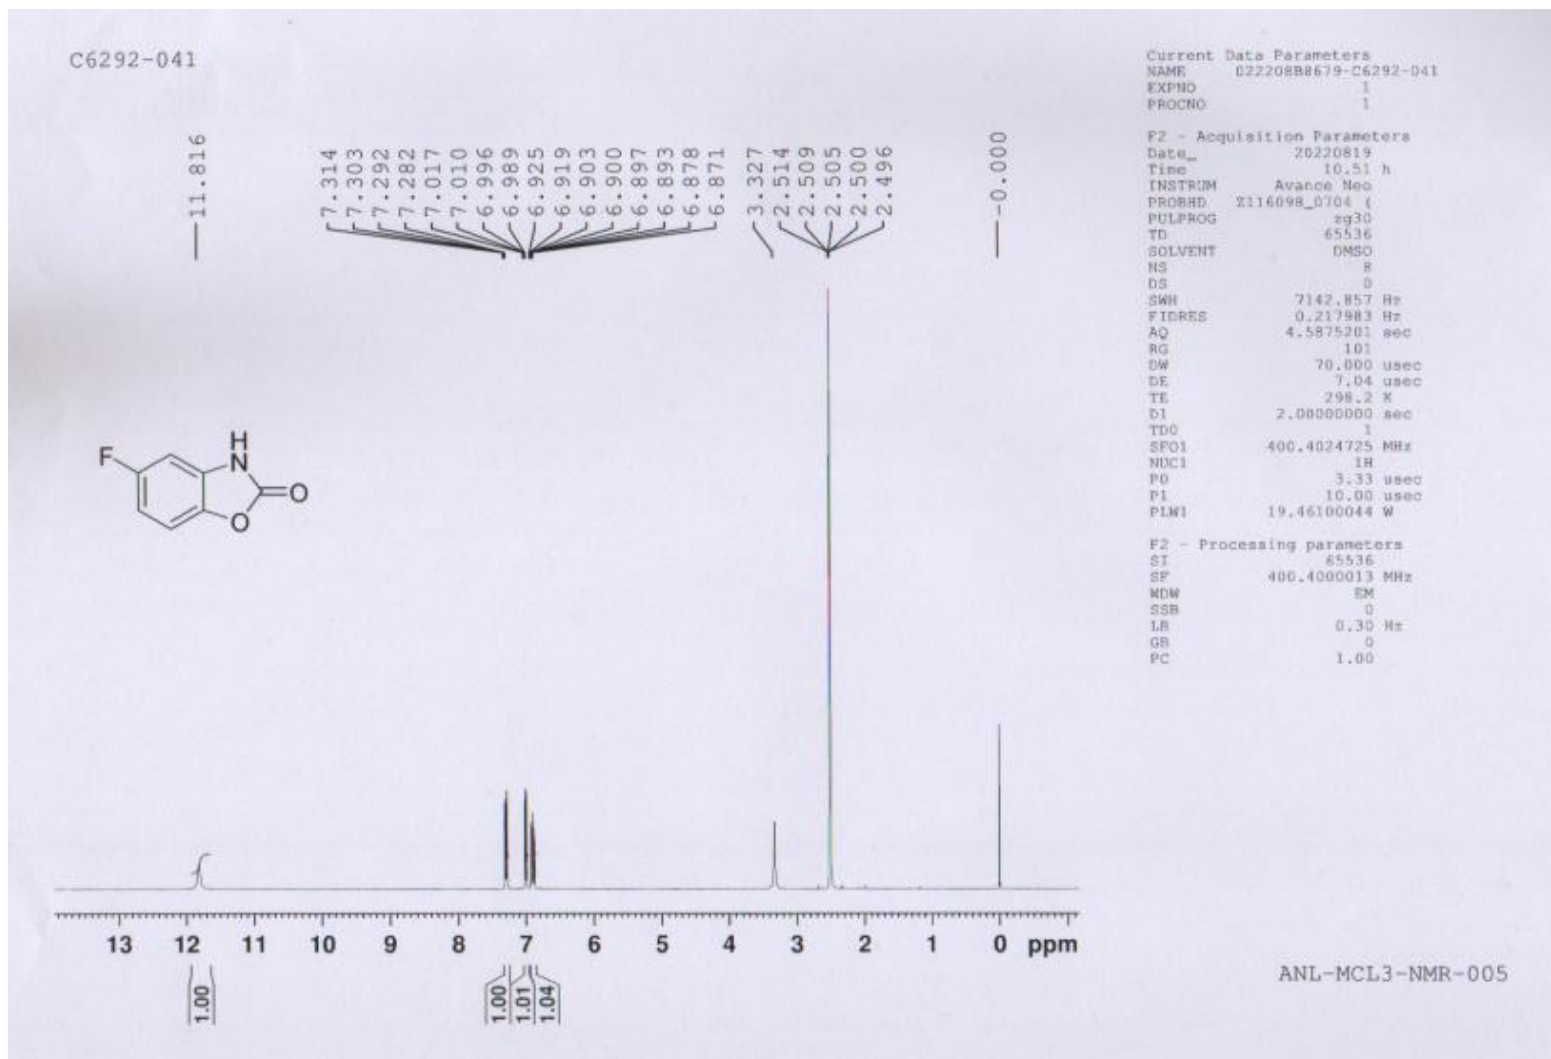

C6292-041

7.314  
7.303  
7.292  
7.282

7.017  
7.010  
6.996  
6.989  
6.925  
6.919  
6.903  
6.900  
6.897  
6.893  
6.878  
6.871

Current Data Parameters  
NAME 022208B8679-C6292-041  
EXPNO 1  
PROCNO 1

F2 - Acquisition Parameters  
Date\_ 20220819  
Time 10.51 h  
INSTRUM Avance Neo  
PROBHD Z116096\_0704 (   
PULPROG zg30  
TD 65536  
SOLVENT DMSO  
NS 8  
DS 0  
SWH 7142.857 Hz  
FIDRES 0.217983 Hz  
AQ 4.5875201 sec  
RG 101  
DW 70.000 usec  
DE 7.04 usec  
TE 298.2 K  
D1 2.00000000 sec  
TDO 1  
SFO1 400.4024725 MHz  
NUC1 1H  
PO 3.33 usec  
P1 10.00 usec  
PLW1 19.46100044 W

F2 - Processing parameters  
SI 65536  
SF 400.4000013 MHz  
WDW EM  
SSB 0  
LB 0.30 Hz  
GB 0  
PC 1.00

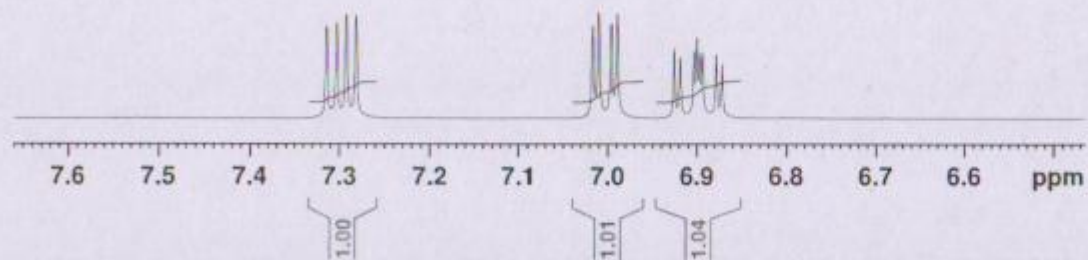

ANL-MCL3-NMR-005



# <sup>13</sup>C NMR of 5-Fluorobenzo[d]oxazol-2(3H)-one (2s)

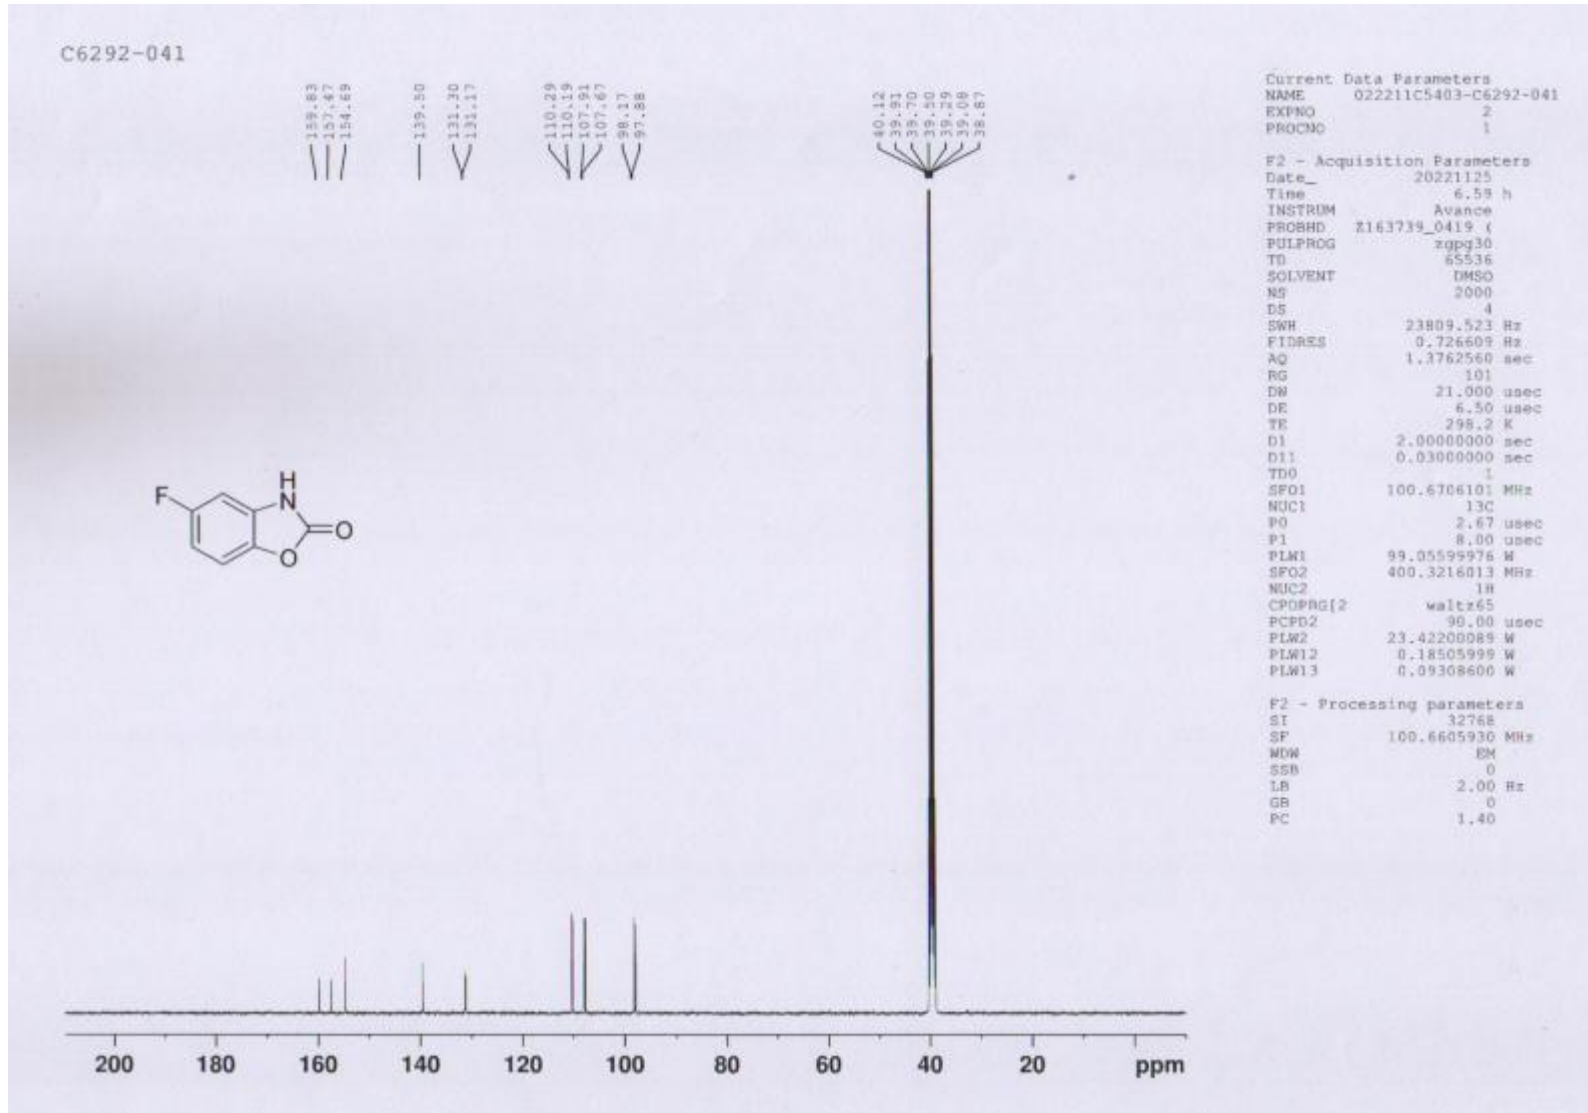

C6292-041

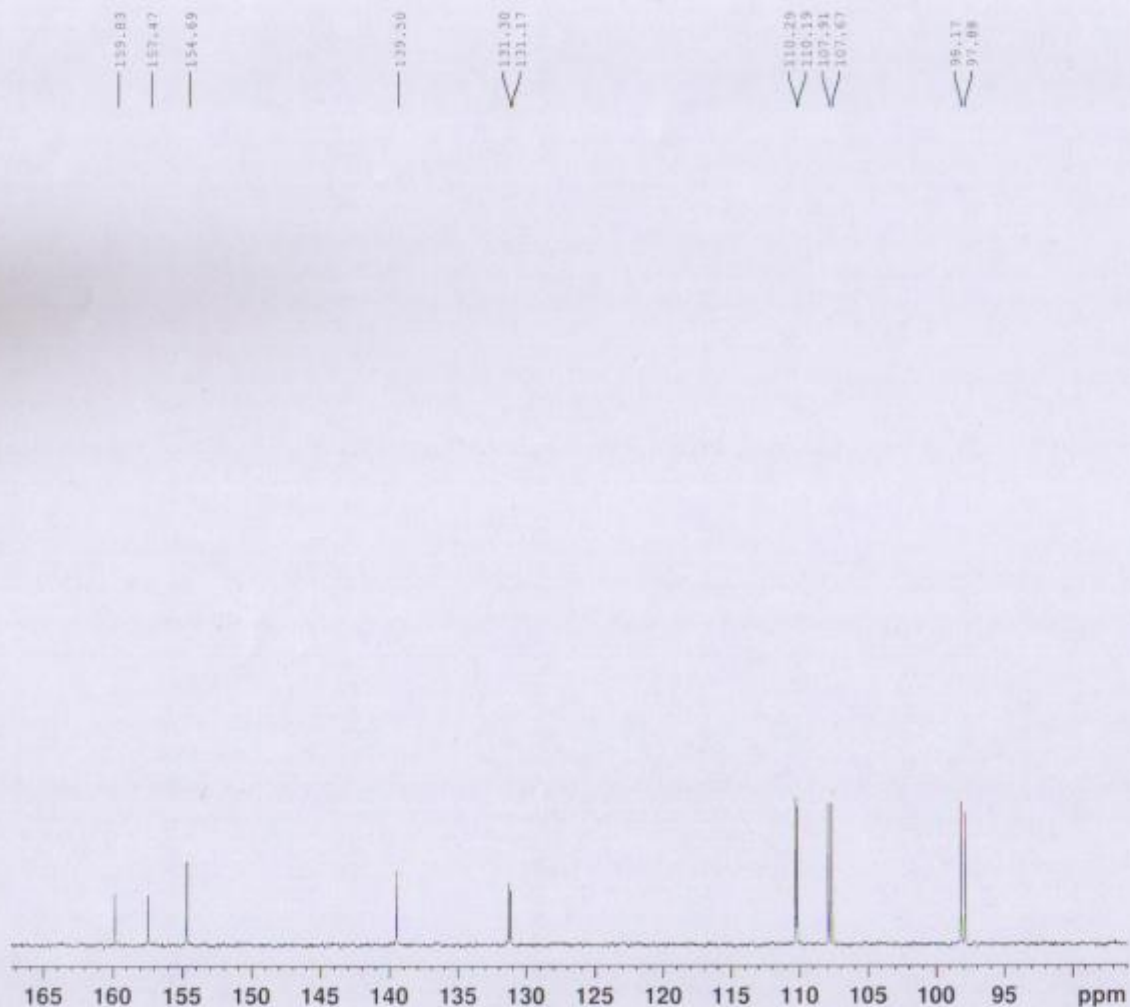

Current Data Parameters  
NAME 022211C5403-C6292-041  
EXPNO 2  
PROCNO 1

F2 - Acquisition Parameters  
Date\_ 20221125  
Time 6.59 h  
INSTRUM Avance  
PROBHD E163739\_0419 1  
PULPROG zgpg30  
ID 65536  
SOLVENT DMSO  
NS 2000  
DS 4  
SWH 23809.523 Hz  
FIDRES 0.726609 Hz  
AQ 1.3762560 sec  
RG 101  
DW 21.000 usec  
DE 6.50 usec  
TE 298.2 K  
D1 2.0000000 sec  
D11 0.0300000 sec  
TD0 1  
SFO1 100.6706101 MHz  
NUC1 13C  
P0 2.67 usec  
P1 8.00 usec  
PLW1 99.05599976 W  
SFO2 400.3216013 MHz  
NUC2 1H  
CPDPRG2 waltz165  
PCPD02 90.00 usec  
PLW2 23.42200089 W  
PLW12 0.18505999 W  
PLW13 0.09308600 W

F2 - Processing parameters  
SI 32768  
SF 100.6605930 MHz  
WDW EM  
SSB 0  
LB 2.00 Hz  
GB 0  
PC 1.40

# LCMS of 5-Fluorobenzo[d]oxazol-2(3H)-one (2s)

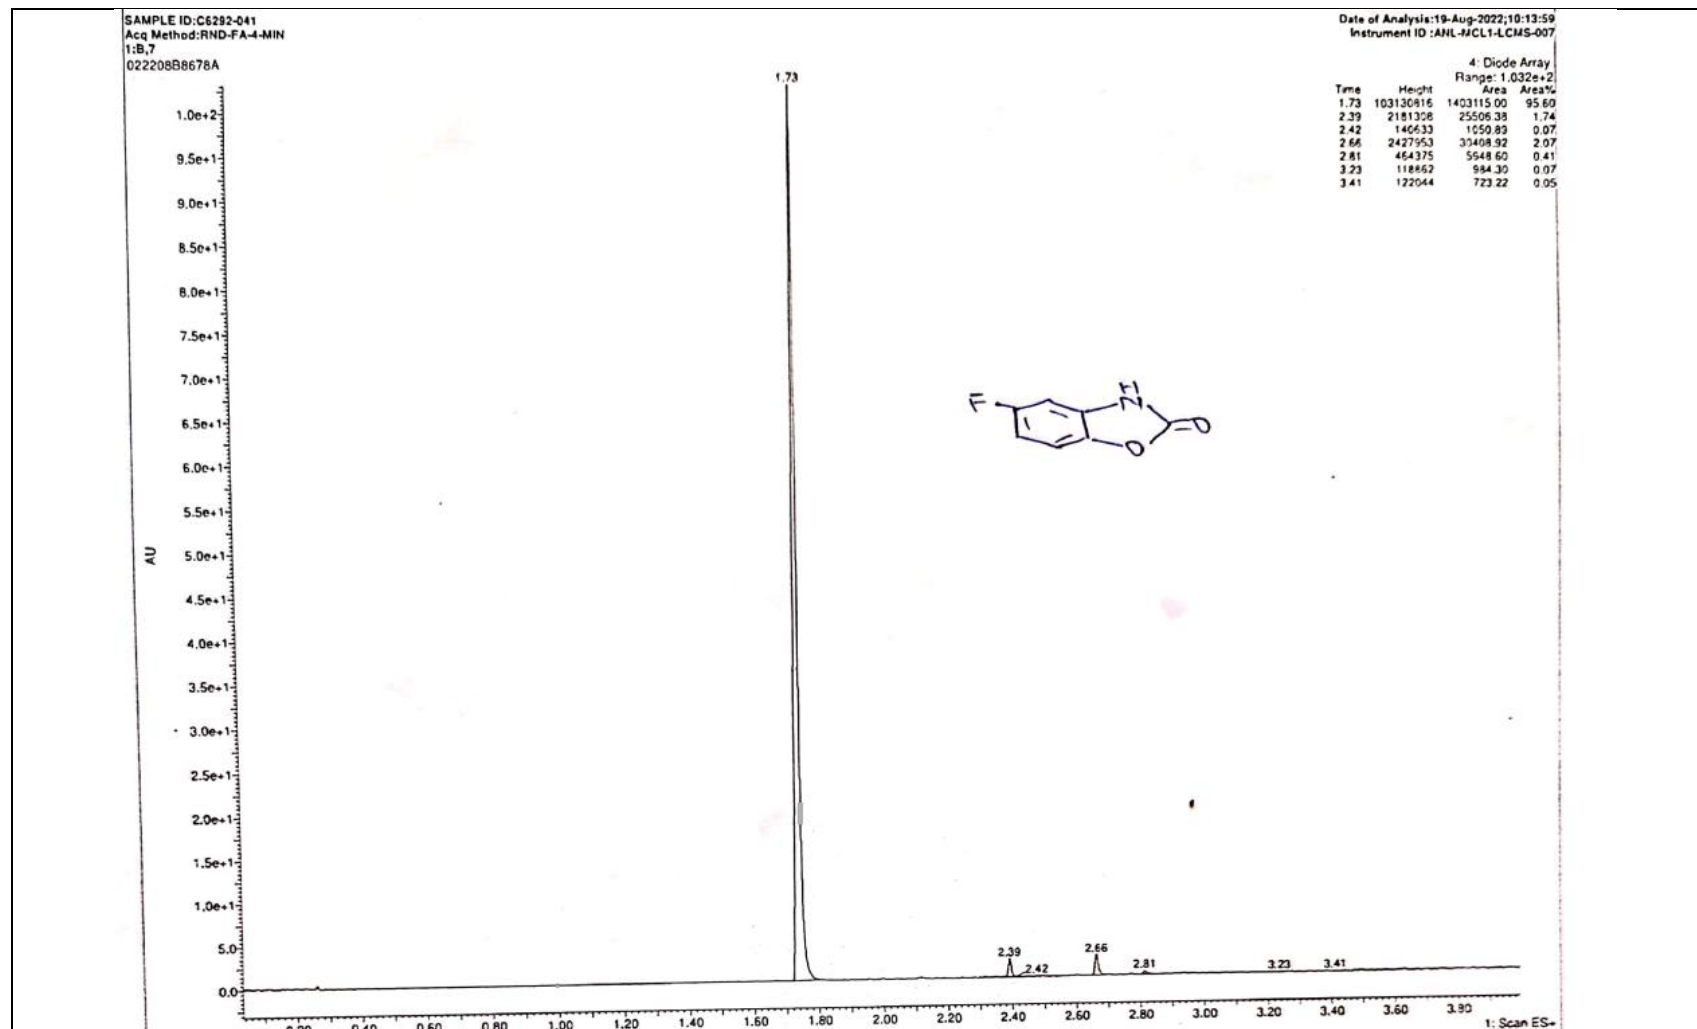

SAMPLE ID: C025041  
Acq Method: FID-FA-AJVN  
022008678A.SI (1.742)  
100%

\*\*\*\*\*

Date of Analysis: 19-Aug-2022 10:13:39  
Instrument ID: JNL-MCL1-L08-007  
1: Scan ES+  
5.31e6

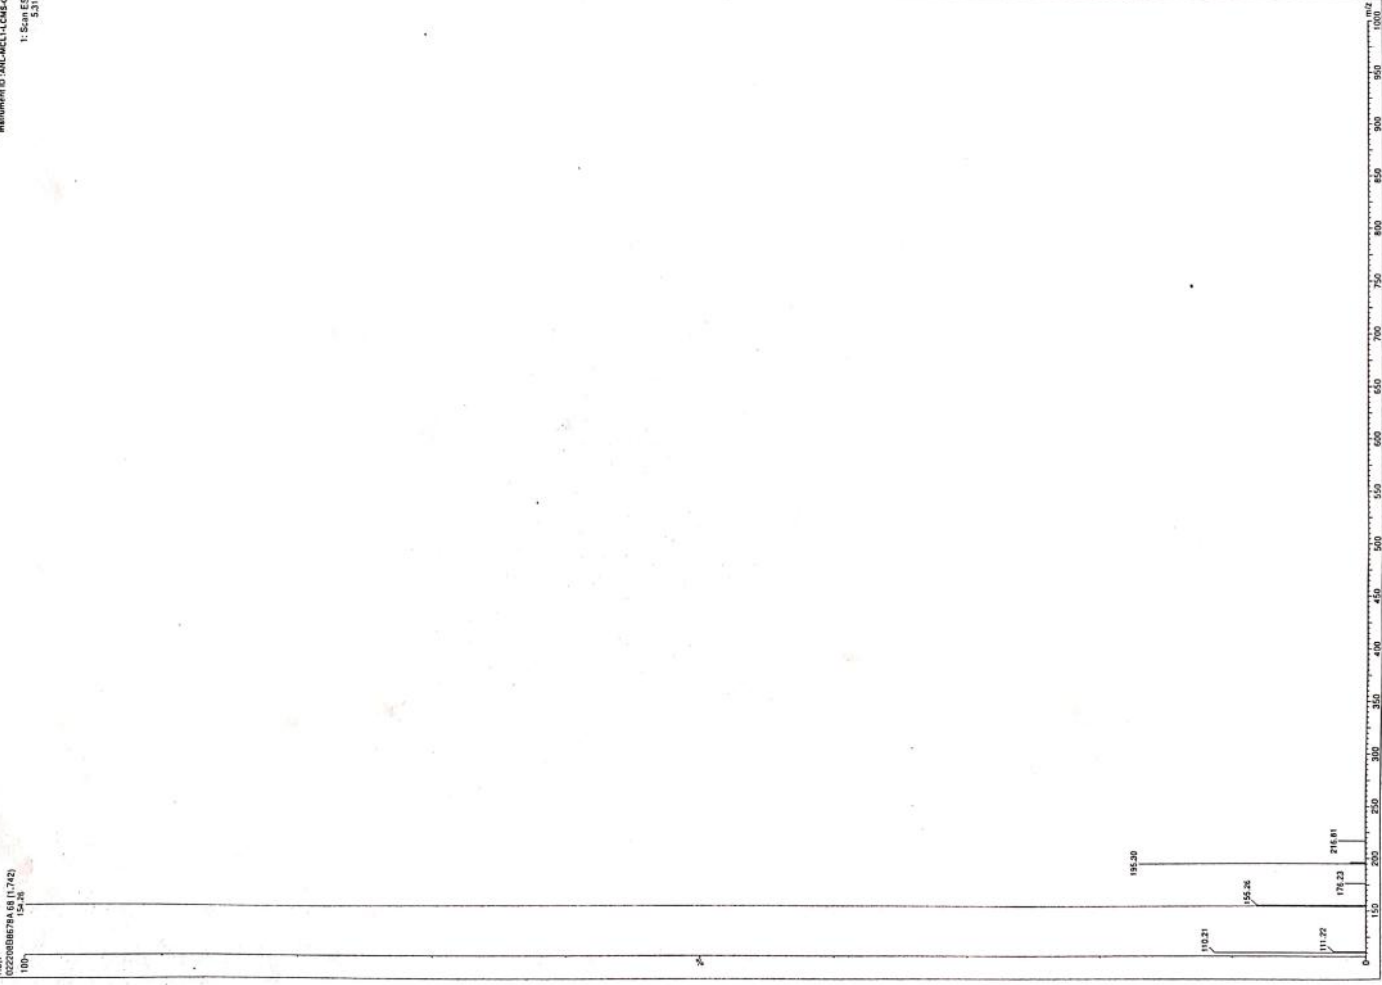

# <sup>1</sup>H NMR of 5-Methylbenzo[d]oxazol-2(3H)-one (2t)

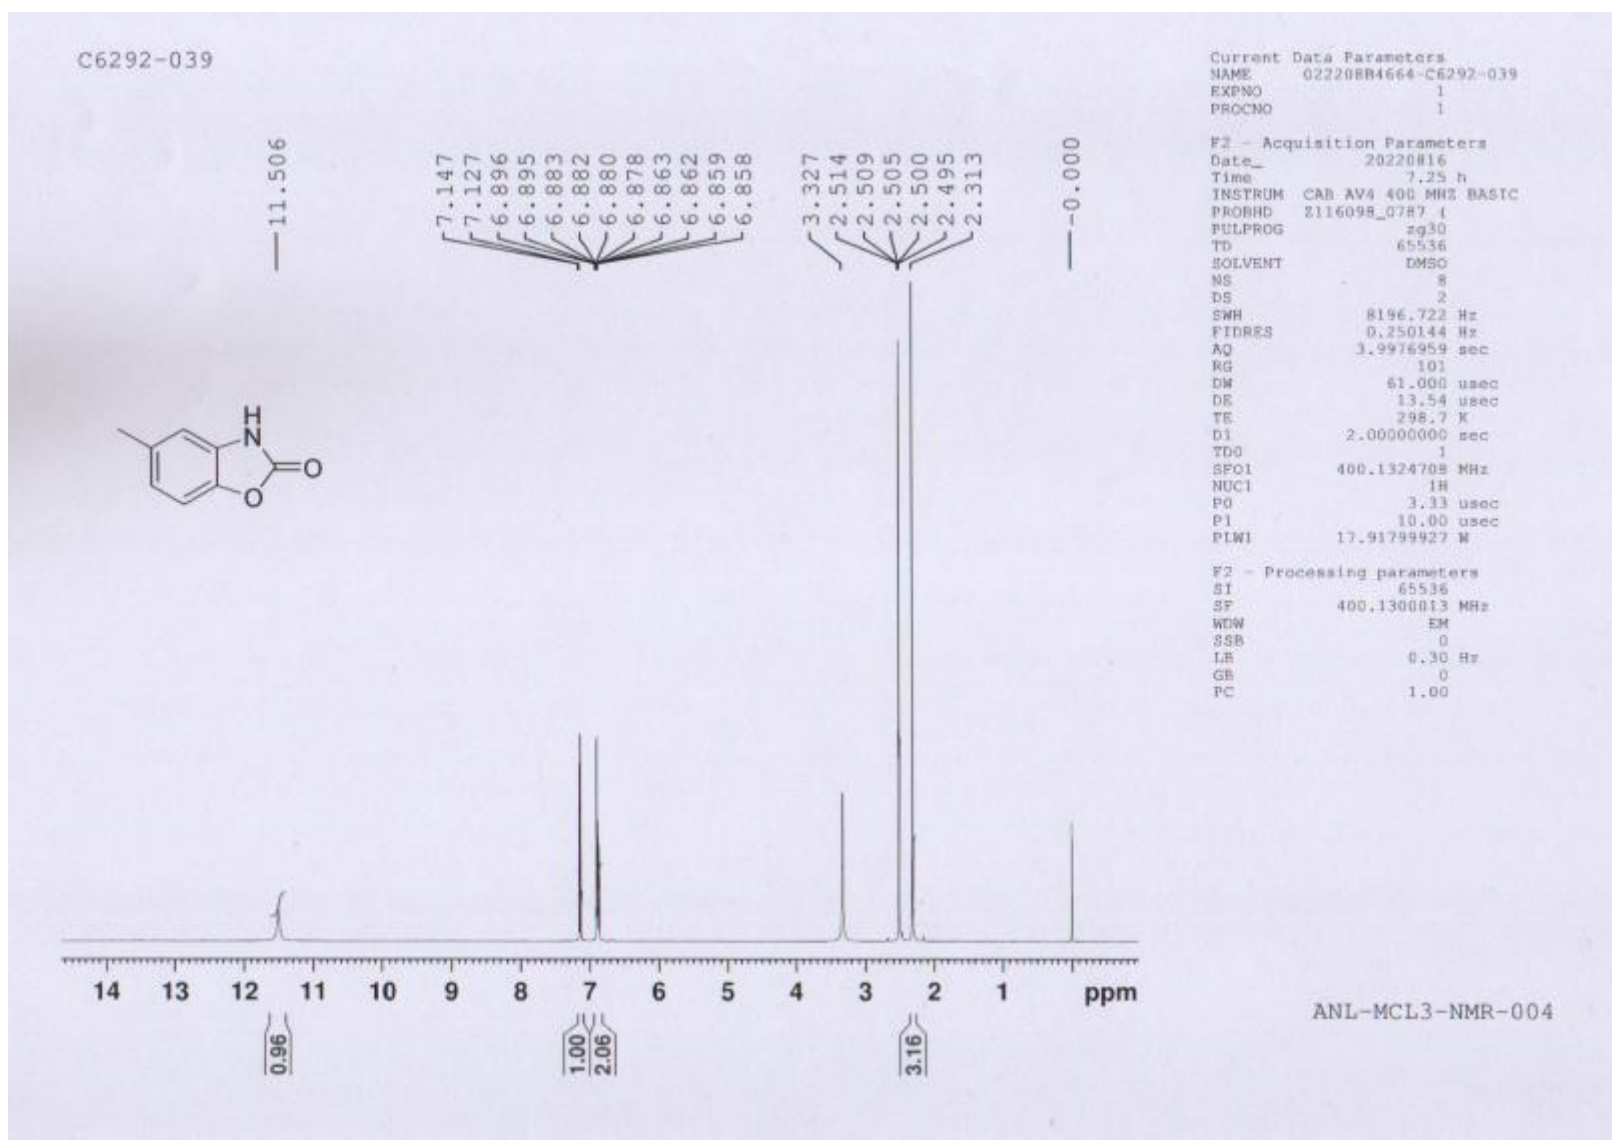

C6292-039

7.147  
7.127  
6.896  
6.895  
6.883  
6.882  
6.880  
6.878  
6.863  
6.862  
6.859  
6.858

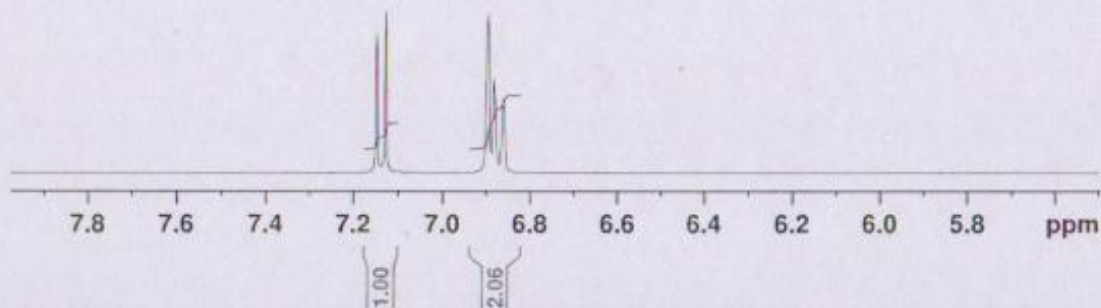

Current Data Parameters  
NAME 02220884664-C6292-039  
EXPNO 1  
PROCNO 1

F2 - Acquisition Parameters  
Date\_ 20220816  
Time 7.25 h  
INSTRUM CAS AV4 400 MHz BASIC  
PROBHD Z116098\_0787 ( )  
PULPROG zg30  
TD 65536  
SOLVENT DMSO  
NS 8  
DS 2  
SWH 8196.722 Hz  
FIDRES 0.250144 Hz  
AQ 3.9976959 sec  
RG 101  
DW 61.000 usec  
DE 13.54 usec  
TE 298.7 K  
D1 2.00000000 sec  
TDO 1  
SFO1 400.1324708 MHz  
NUC1 1H  
P0 3.33 usec  
P1 10.00 usec  
PLW1 17.91799927 W

F2 - Processing parameters  
SI 65536  
SF 400.1300013 MHz  
WDW EM  
SSB 0  
LB 0.30 Hz  
GB 0  
PC 1.00

ANL-MCL3-NMR-004

C6292-039

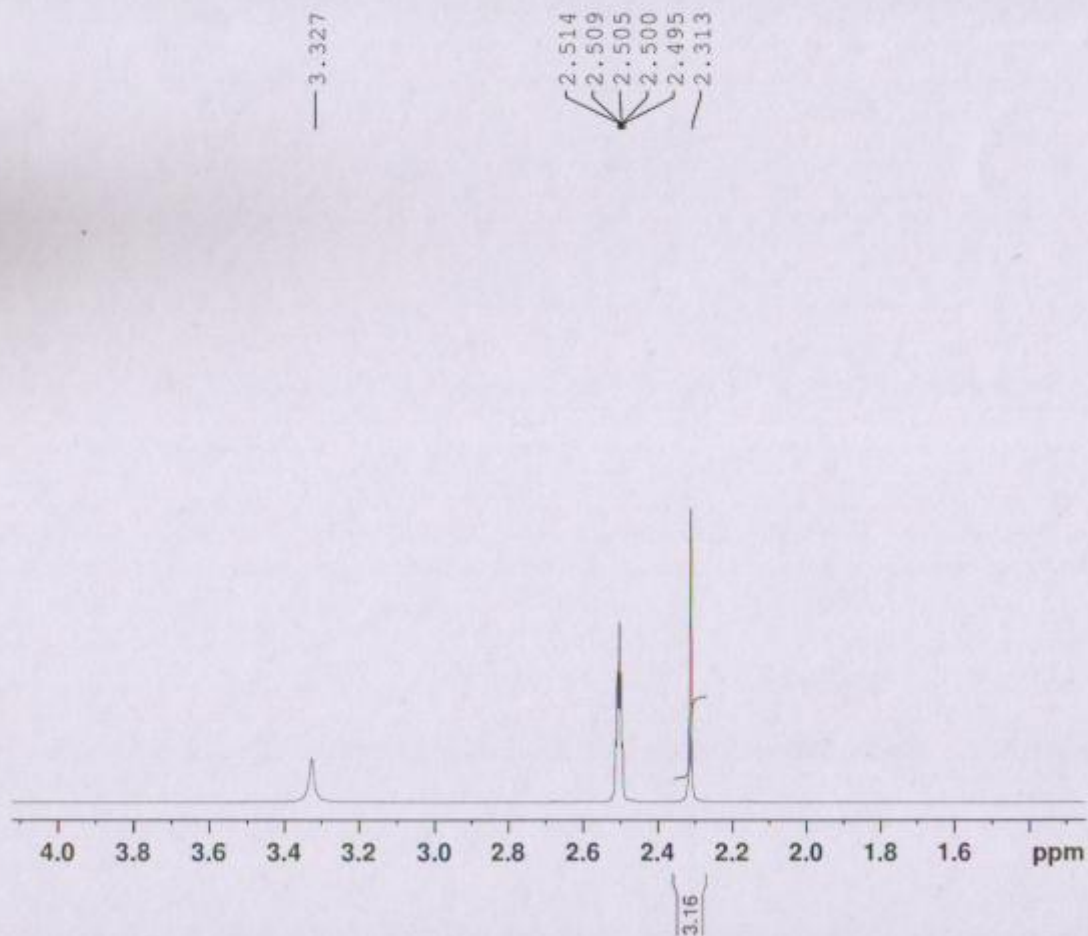

Current Data Parameters  
NAME 022208B4664-C6292-039  
EXPNO 1  
PROCNO 1

F2 - Acquisition Parameters  
Date\_ 20220816  
Time 7.25 h  
INSTRUM CAB AV4 400 MHZ BASIC  
PROBHD Z116098\_0787 4  
PULPROG zg30  
TD 65536  
SOLVENT DMSO  
NS 8  
DS 2  
SWH 8196.722 Hz  
FIDRES 0.250144 Hz  
AQ 3.9976959 sec  
RG 101  
DN 61.000 usec  
DE 13.54 usec  
TE 298.7 K  
D1 2.00000000 sec  
TDO 1  
SFO1 400.1324708 MHz  
NUC1 1H  
PO 3.33 usec  
PI 10.00 usec  
PLW1 17.9179927 W

F2 - Processing parameters  
SI 65536  
SF 400.1300013 MHz  
WDW EM  
SSB 0  
LB 0.30 Hz  
GB 0  
PC 1.00

ANL-MCL3-NMR-004

# <sup>13</sup>C NMR of 5-Methylbenzo[d]oxazol-2(3H)-one (2t)

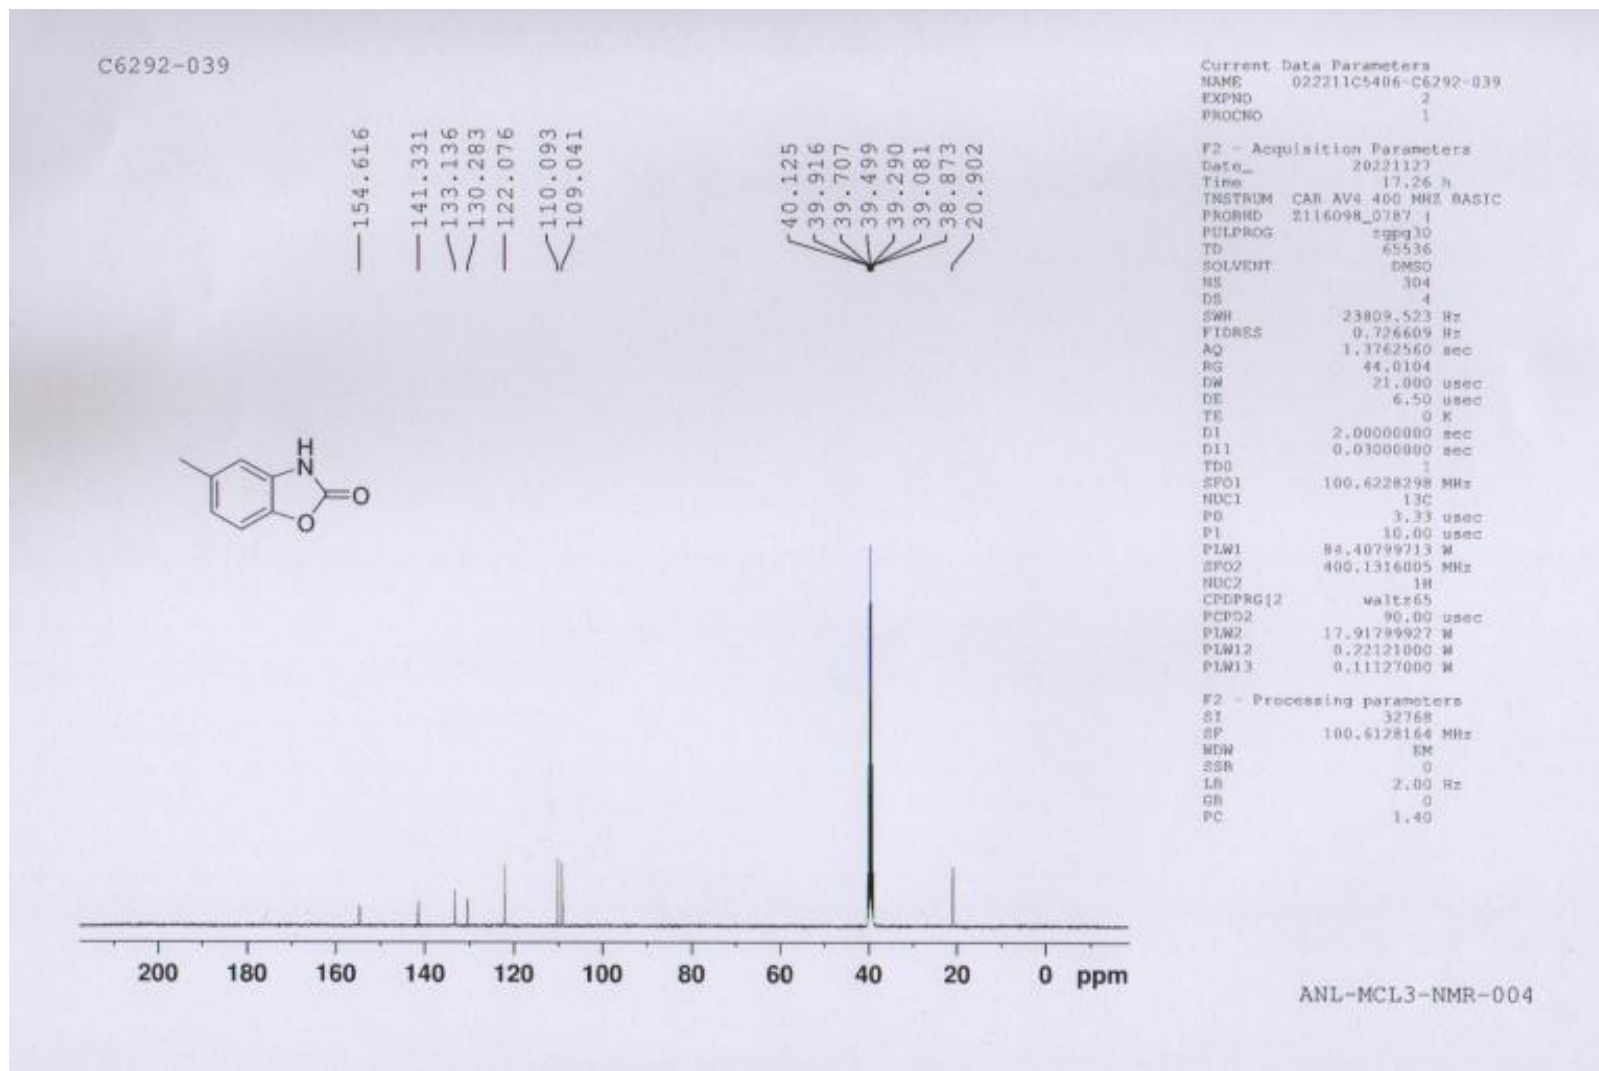



C6292-039

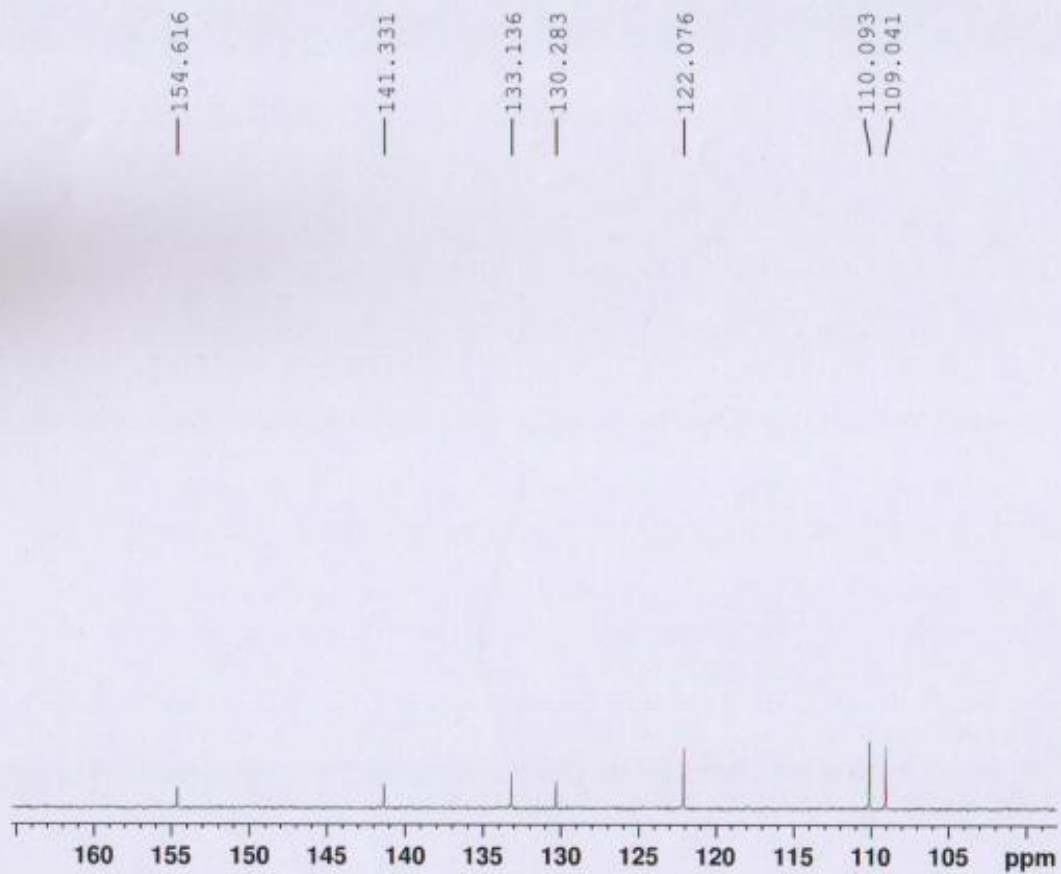

Current Data Parameters  
NAME 022211C5406-C6292-039  
EXPNO 2  
PROCNO 1

F2 - Acquisition Parameters  
Date\_ 20221127  
Time 17.26 h  
INSTRUM CAB AV4 400 MHz BASIC  
PROBHD 2116098\_0787 f  
PULPROG zgpg30  
TD 65536  
SOLVENT DMSO  
NS 304  
DS 4  
SMH 23809.523 Hz  
FIDRES 0.726609 Hz  
AQ 1.3762560 sec  
RG 44.0104  
DM 21.000 usec  
DE 6.50 usec  
TE 0 K  
D1 2.0000000 sec  
D11 0.0300000 sec  
TDS 1  
SFO1 100.6228298 MHz  
NUC1 13C  
P0 3.33 usec  
P1 10.00 usec  
PLW1 84.40799713 W  
SFO2 400.1316005 MHz  
NUC2 1H  
CPDPRG2 waltz65  
PCPD2 90.00 usec  
PLW2 17.91799927 W  
PLW12 0.22121000 W  
PLW13 0.11127000 W

F2 - Processing parameters  
SI 32768  
SF 100.6128164 MHz  
WDW EM  
SSB 0  
LB 2.00 Hz  
GB 0  
PC 1.40

ANL-MCL3-NMR-004

# LCMS of 5-Methylbenzo[d]oxazol-2(3H)-one (2t)

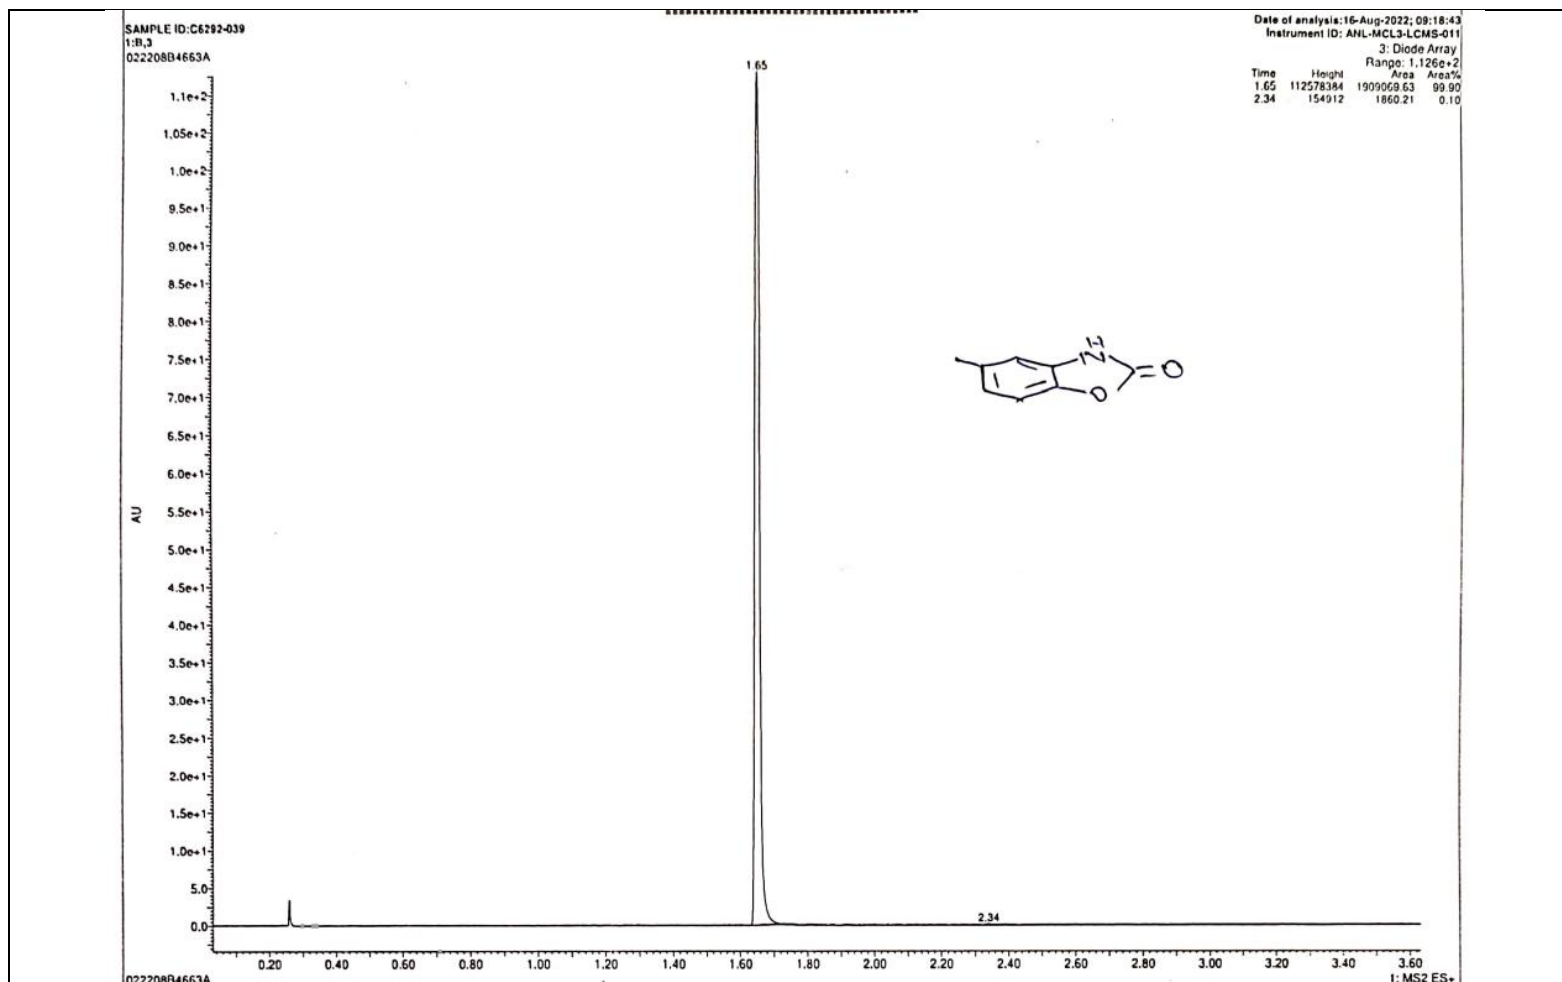

SAMPLE ID: C531-03  
U.S. 2  
022208465A.P (1.67)  
13012

\*\*\*\*\*

Data analysis: July 2007, 08:54  
Instrument: JMS-6000  
1: MS2 ES+  
4.847

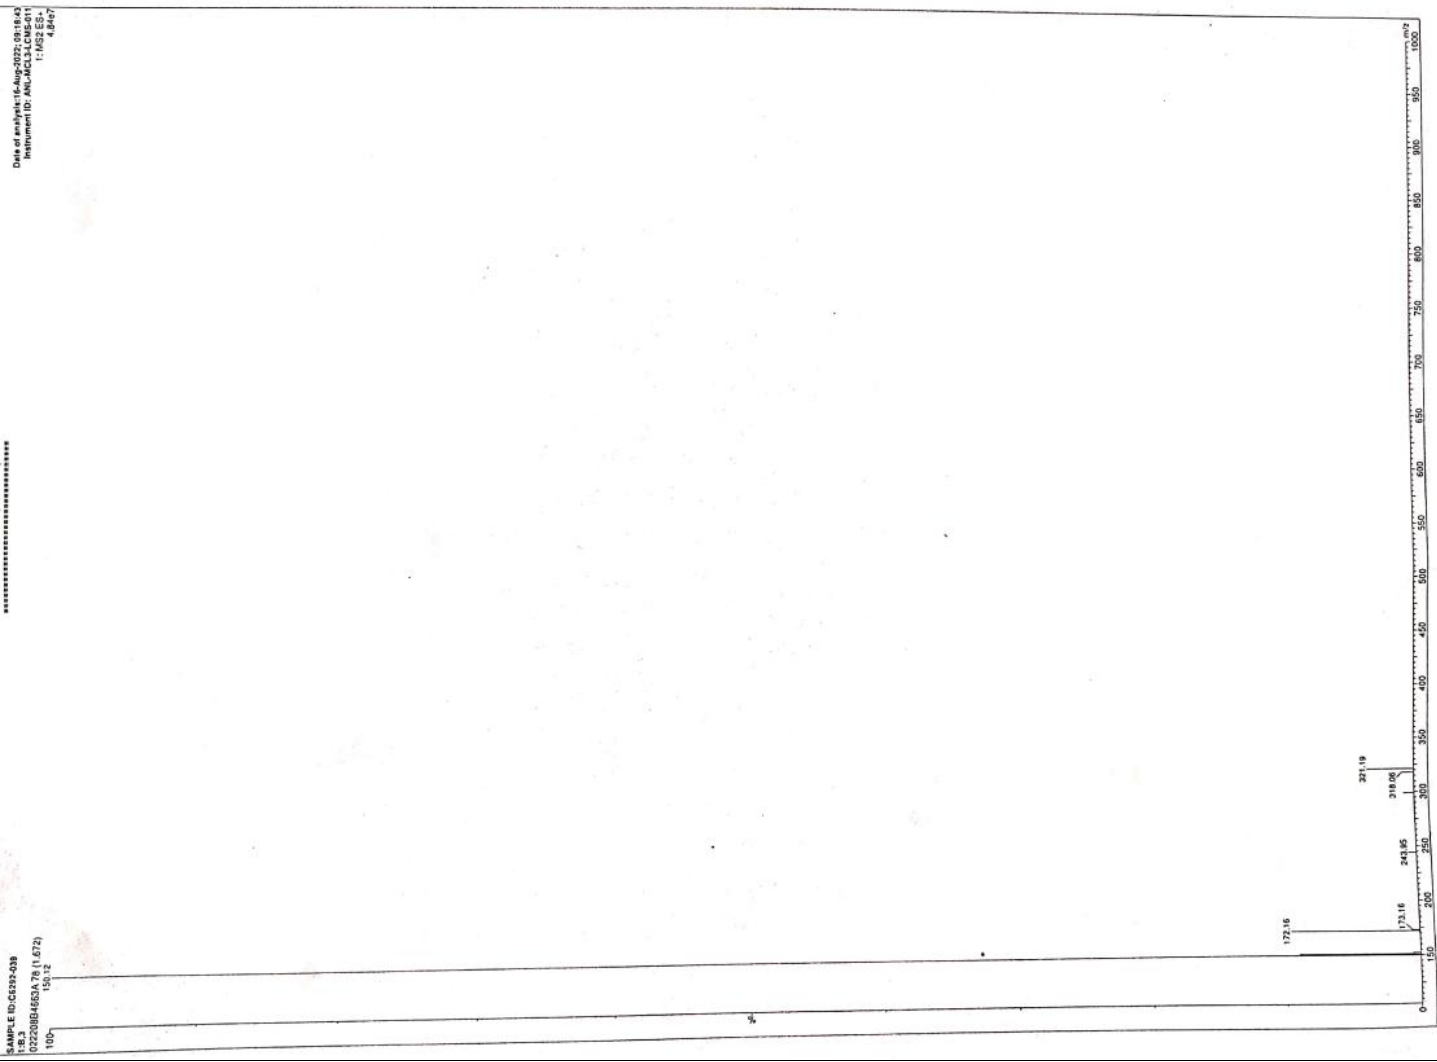

# <sup>1</sup>H NMR of 5-Nitrobenzo[d]oxazol-2(3H)-one (2u)

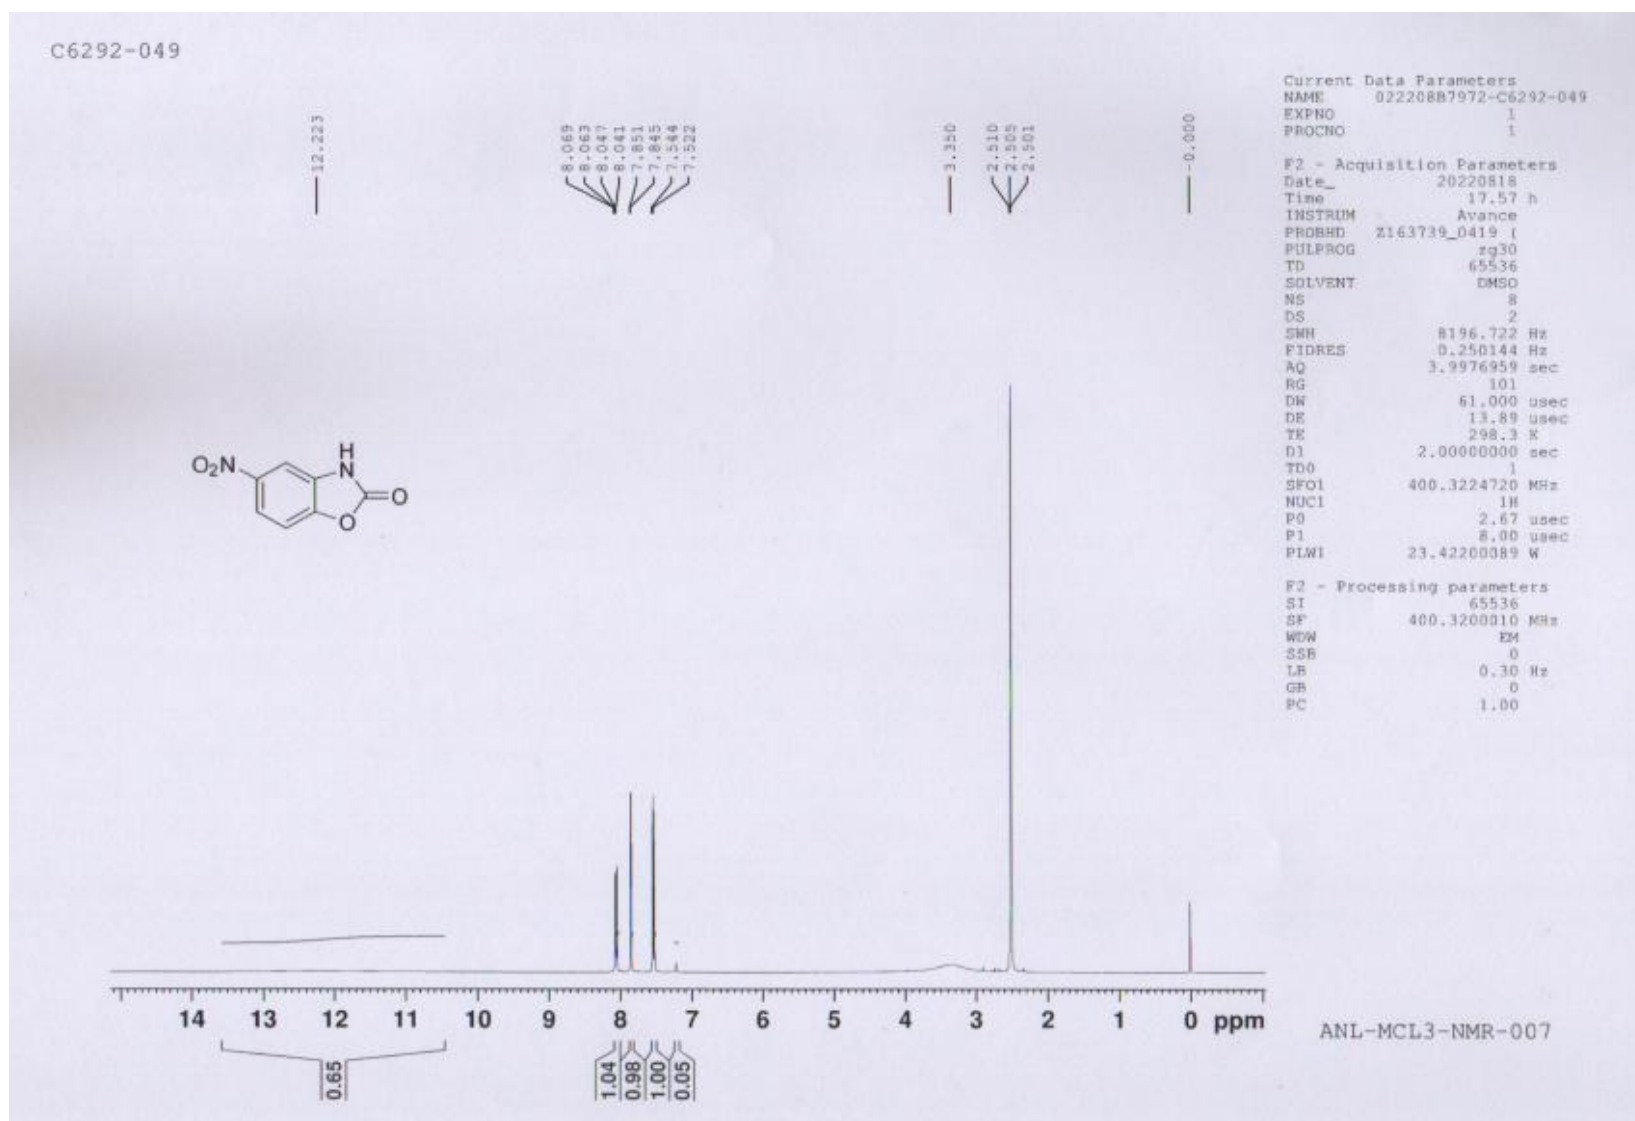

C6292-049

8.069  
8.063  
8.047  
8.041

7.851  
7.845

7.544  
7.522

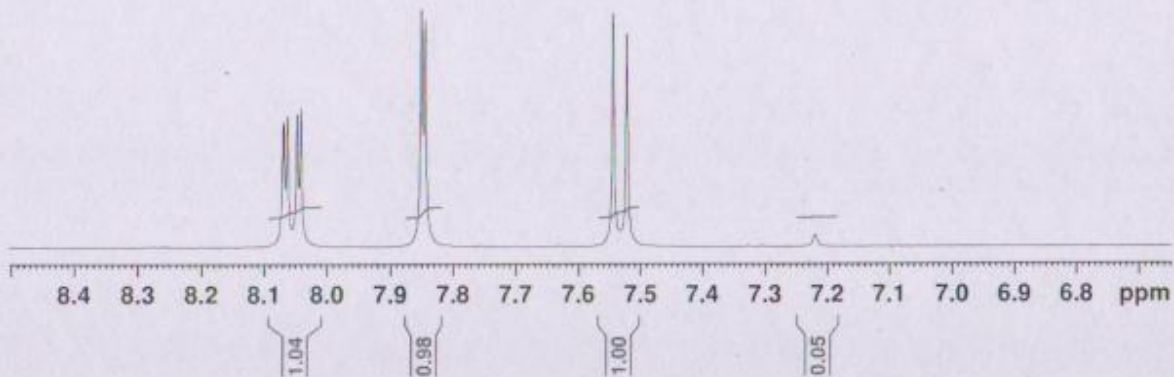

Current Data Parameters  
NAME 02220887972-C6292-049  
EXPNO 1  
PROCNO 1

F2 - Acquisition Parameters  
Date\_ 20220818  
Time 17.57 h  
INSTRUM Avance  
PROBHD Z163739\_0419 (4  
PULPROG zg30  
TD 65536  
SOLVENT DMSO  
NS 8  
DS 2  
SWH 8196.722 Hz  
FIDRES 0.250144 Hz  
AQ 3.9976959 sec  
RG 101  
DW 61.000 usec  
DE 13.89 usec  
TE 298.3 K  
D1 2.00000000 sec  
TD0 1  
SFO1 400.3224720 MHz  
NUC1 1H  
P0 2.67 usec  
P1 8.00 usec  
PLW1 23.42200089 W

F2 - Processing parameters  
SI 65536  
SF 400.3200010 MHz  
WDW EM  
SSB 0  
LB 0.30 Hz  
GB 0  
PC 1.00

ANL-MCL3-NMR-007

# <sup>13</sup>C NMR of 5-Nitrobenzo[d]oxazol-2(3H)-one (2u)

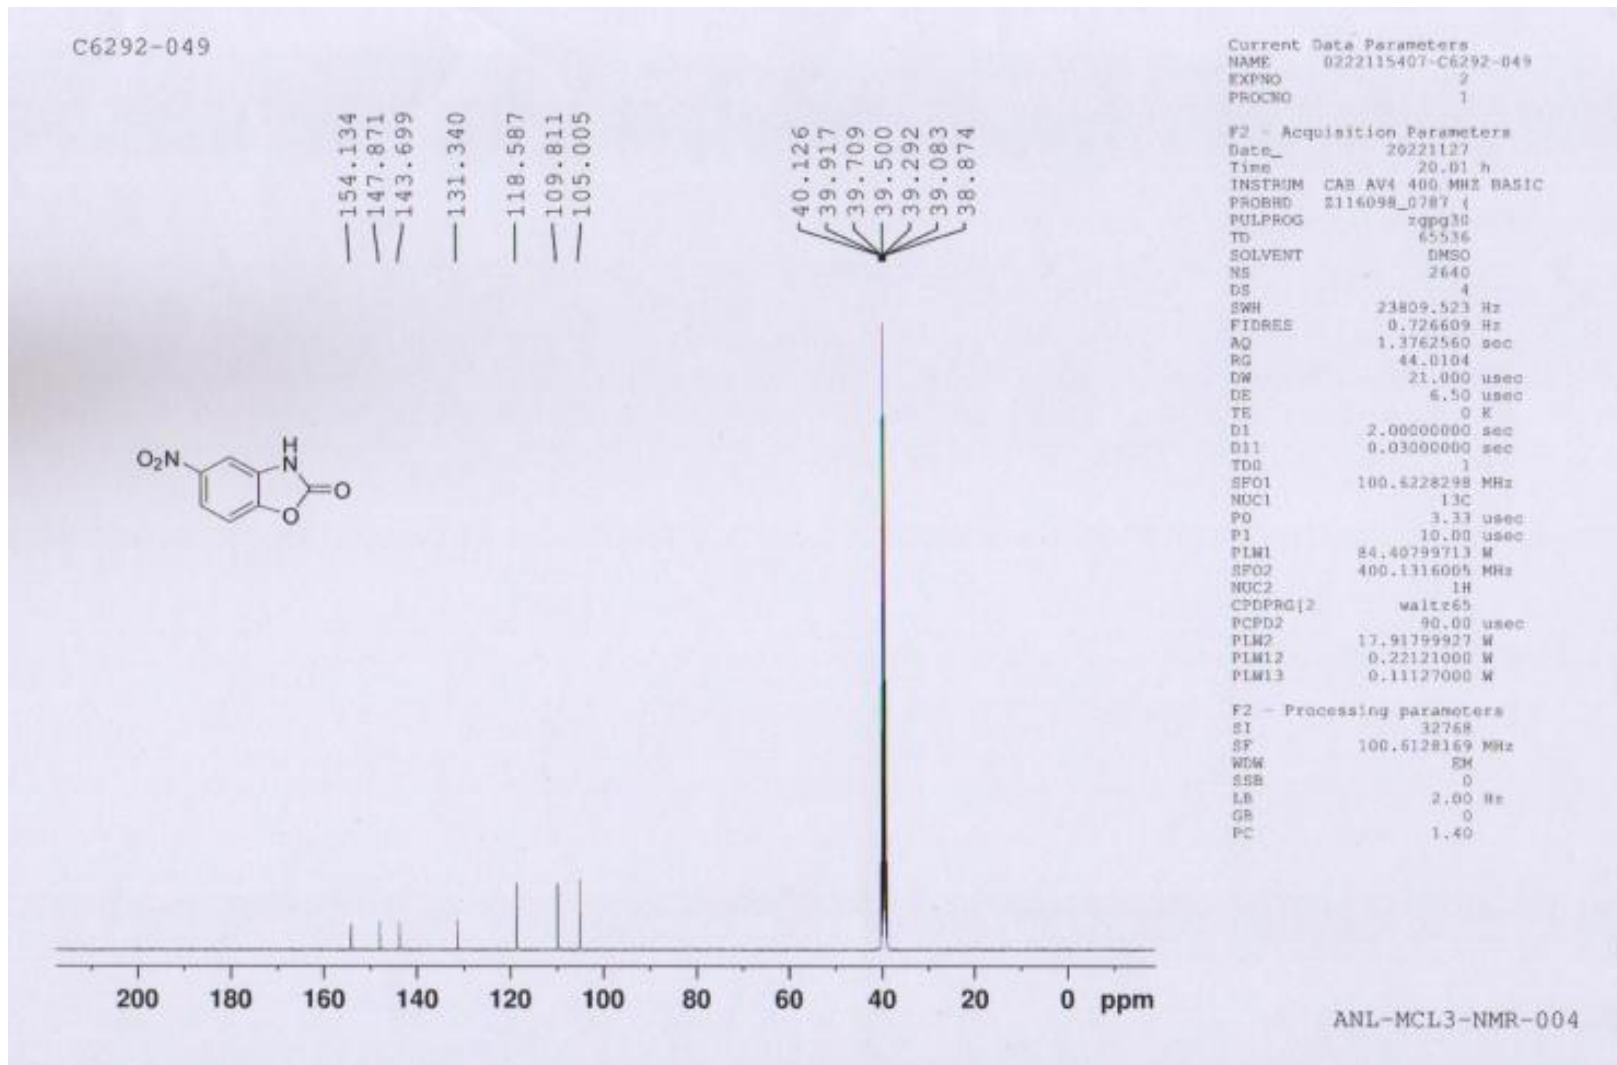

C6292-049

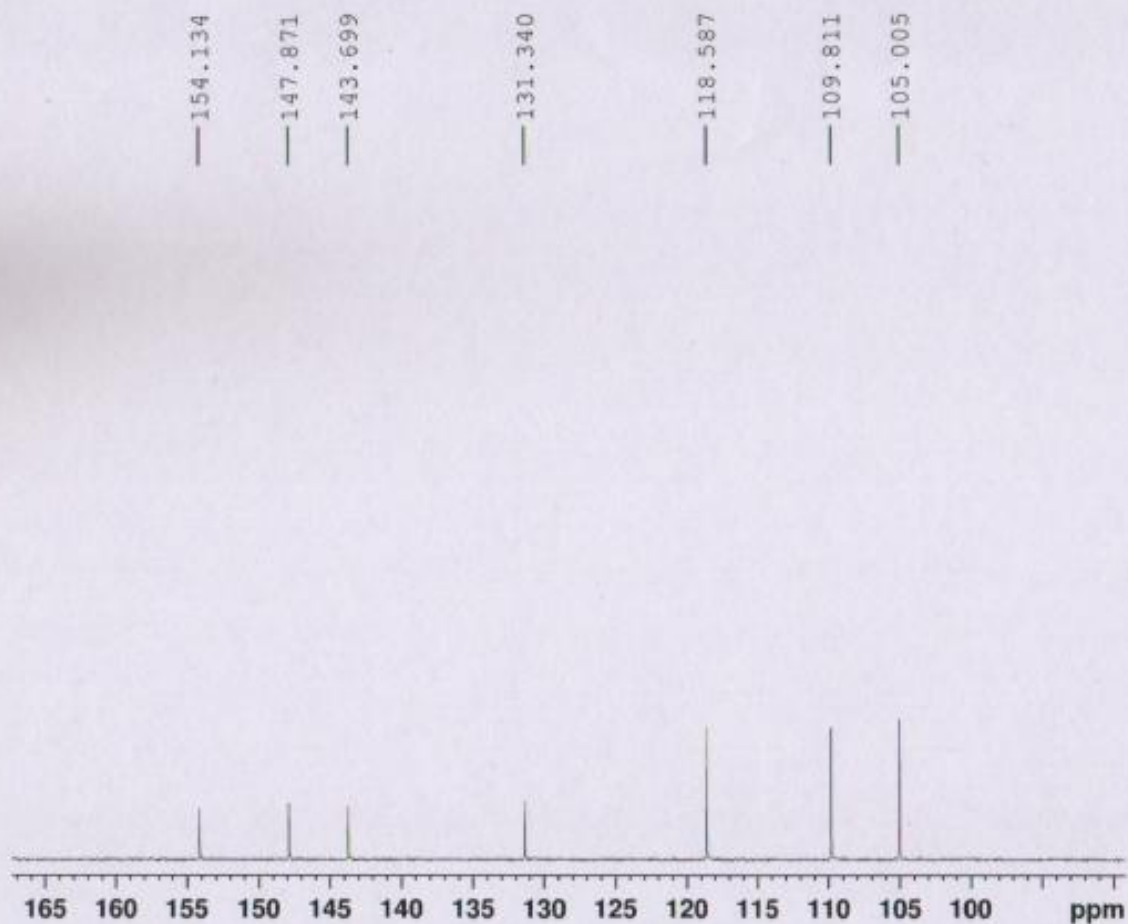

Current Data Parameters  
NAME 0222115407-C6292-049  
EXPNO 2  
PROCNO 1

F2 - Acquisition Parameters  
Date\_ 20221127  
Time 20.01 h  
INSTRUM CAB AV4 400 MHz BASIC  
PROBHD 2116098\_0787 ( )  
PULPROG zgpg30  
TD 65536  
SOLVENT DMSO  
NS 2640  
DS 4  
SWH 23809.523 Hz  
FIDRES 0.726609 Hz  
AQ 1.3762560 sec  
RG 44.0104  
DW 21.000 usec  
DE 6.50 usec  
TE 0 K  
D1 2.00000000 sec  
D11 0.03000000 sec  
TD0 1  
SFO1 100.6228298 MHz  
NUC1 13C  
P0 3.33 usec  
P1 10.00 usec  
PLW1 84.40799713 W  
SFO2 400.1316005 MHz  
NUC2 1H  
CPDPRG(2) waltz65  
PCPD2 90.00 usec  
PLW2 17.91799927 W  
PLW12 0.22121000 W  
PLW13 0.11127000 W

F2 - Processing parameters  
SI 32768  
SF 100.6128169 MHz  
WDW EM  
SSB 0  
LB 2.00 Hz  
GB 0  
PC 1.40

ANL-MCL3-NMR-004

LCMS of 5-Nitrobenzo[d]oxazol-2(3H)-one (2u)

Sample ID C6292-049  
Acq Method LCMS\_FA\_4  
2:B,6  
022208B7971

Instrument ID ANL-MCL3-LCMS-011  
Date of Analysis 18-Aug-2022 17:40:13

| Time | Area          | Area% |
|------|---------------|-------|
| 0.94 | 64251988.08   | 1.11  |
| 1.55 | 5669259177.63 | 97.75 |
| 1.87 | 7648244.00    | 0.13  |
| 2.91 | 58820665.50   | 1.01  |

Diode Array

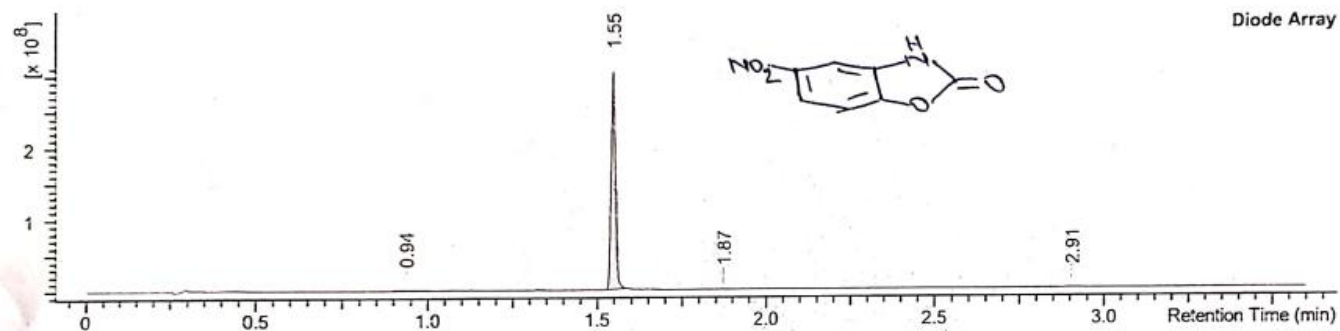



Acq Method LCMS\_FA\_4

2:B,6

022208B7971

Instrument ID ANL-MCL3-LCMS-011

Date of Analysis 18-Aug-2022 17:40:13

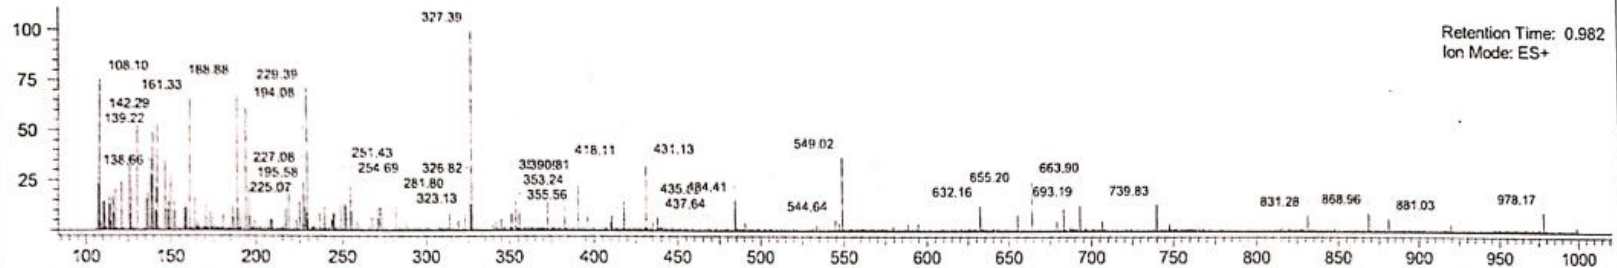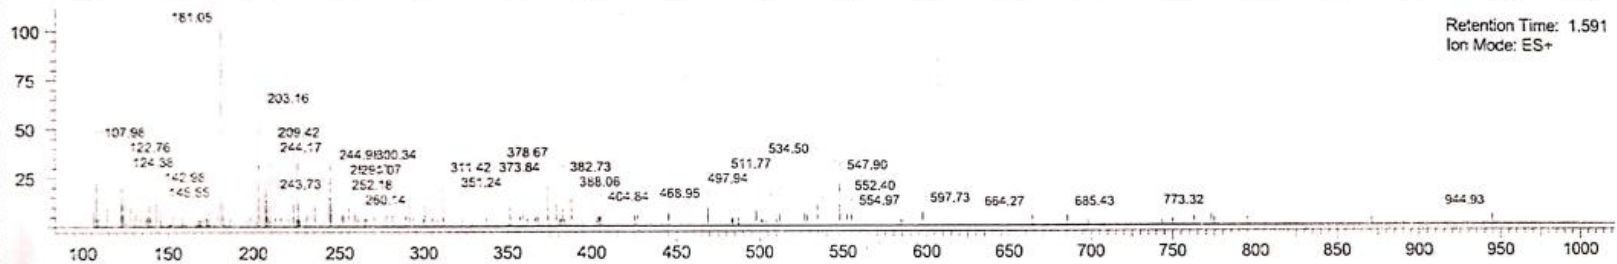

# <sup>1</sup>H NMR of 4-Bromo-2-iodo-6-nitroaniline (2)

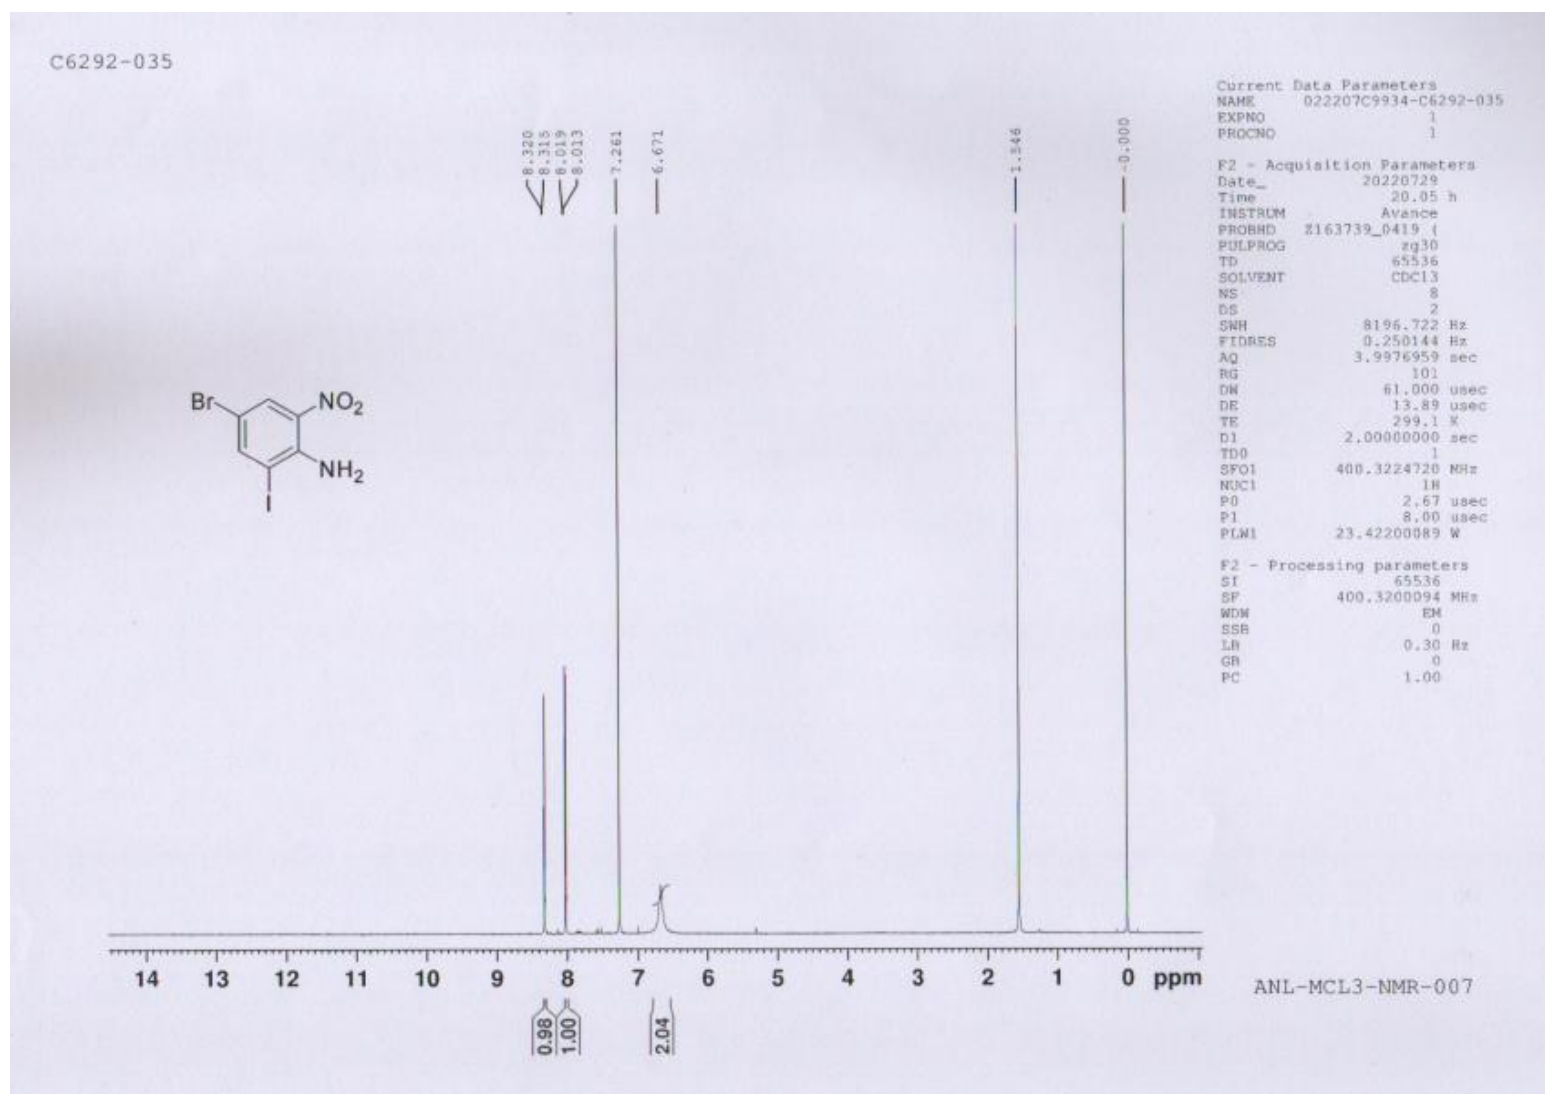

C6292-035

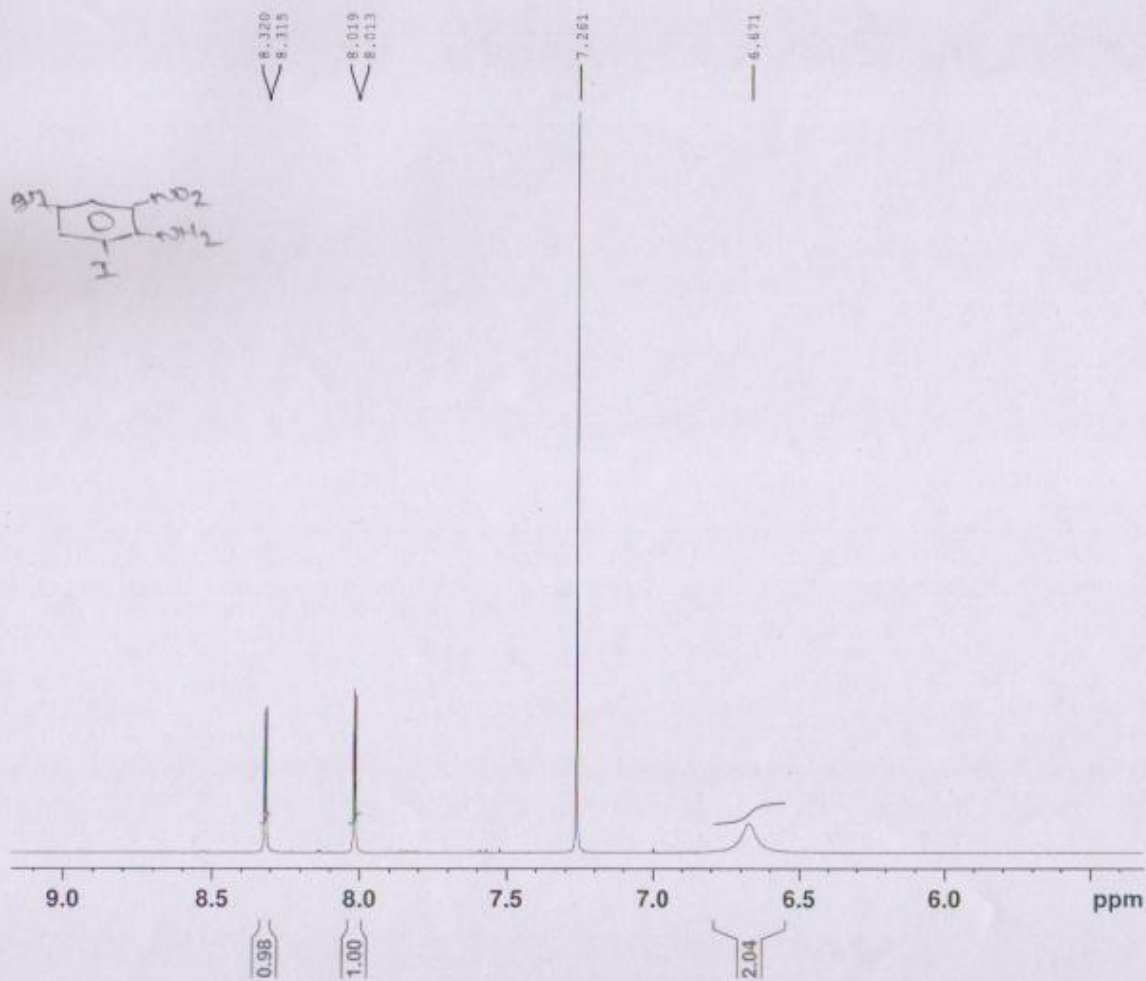

Current Data Parameters  
NAME 022207C9934-C6292-035  
EXPNO 1  
PROCNO 1

F2 - Acquisition Parameters  
Date\_ 20220729  
Time 20.05 h  
INSTRUM Avance  
PROBHD Z163739\_0419 (   
PULPROG zg30  
TD 65536  
SOLVENT CDCl3  
NS 8  
DS 2  
SMH 8196.722 Hz  
FIDRES 0.250144 Hz  
AQ 3.9976959 sec  
RG 101  
DN 61.000 usec  
DE 13.89 usec  
TE 299.1 K  
D1 2.0000000 sec  
TDD 1  
SFO1 400.3224720 MHz  
NUC1 1H  
PD 2.67 usec  
P1 8.00 usec  
PLWI 23.42200089 W

F2 - Processing parameters  
SI 65536  
SF 400.3200094 MHz  
WDW EM  
SSB 0  
LA 0.30 Hz  
GB 0  
PC 1.00

ANL-MCL3-NMR-007

# <sup>13</sup>C NMR of 4-Bromo-2-iodo-6-nitroaniline (2)

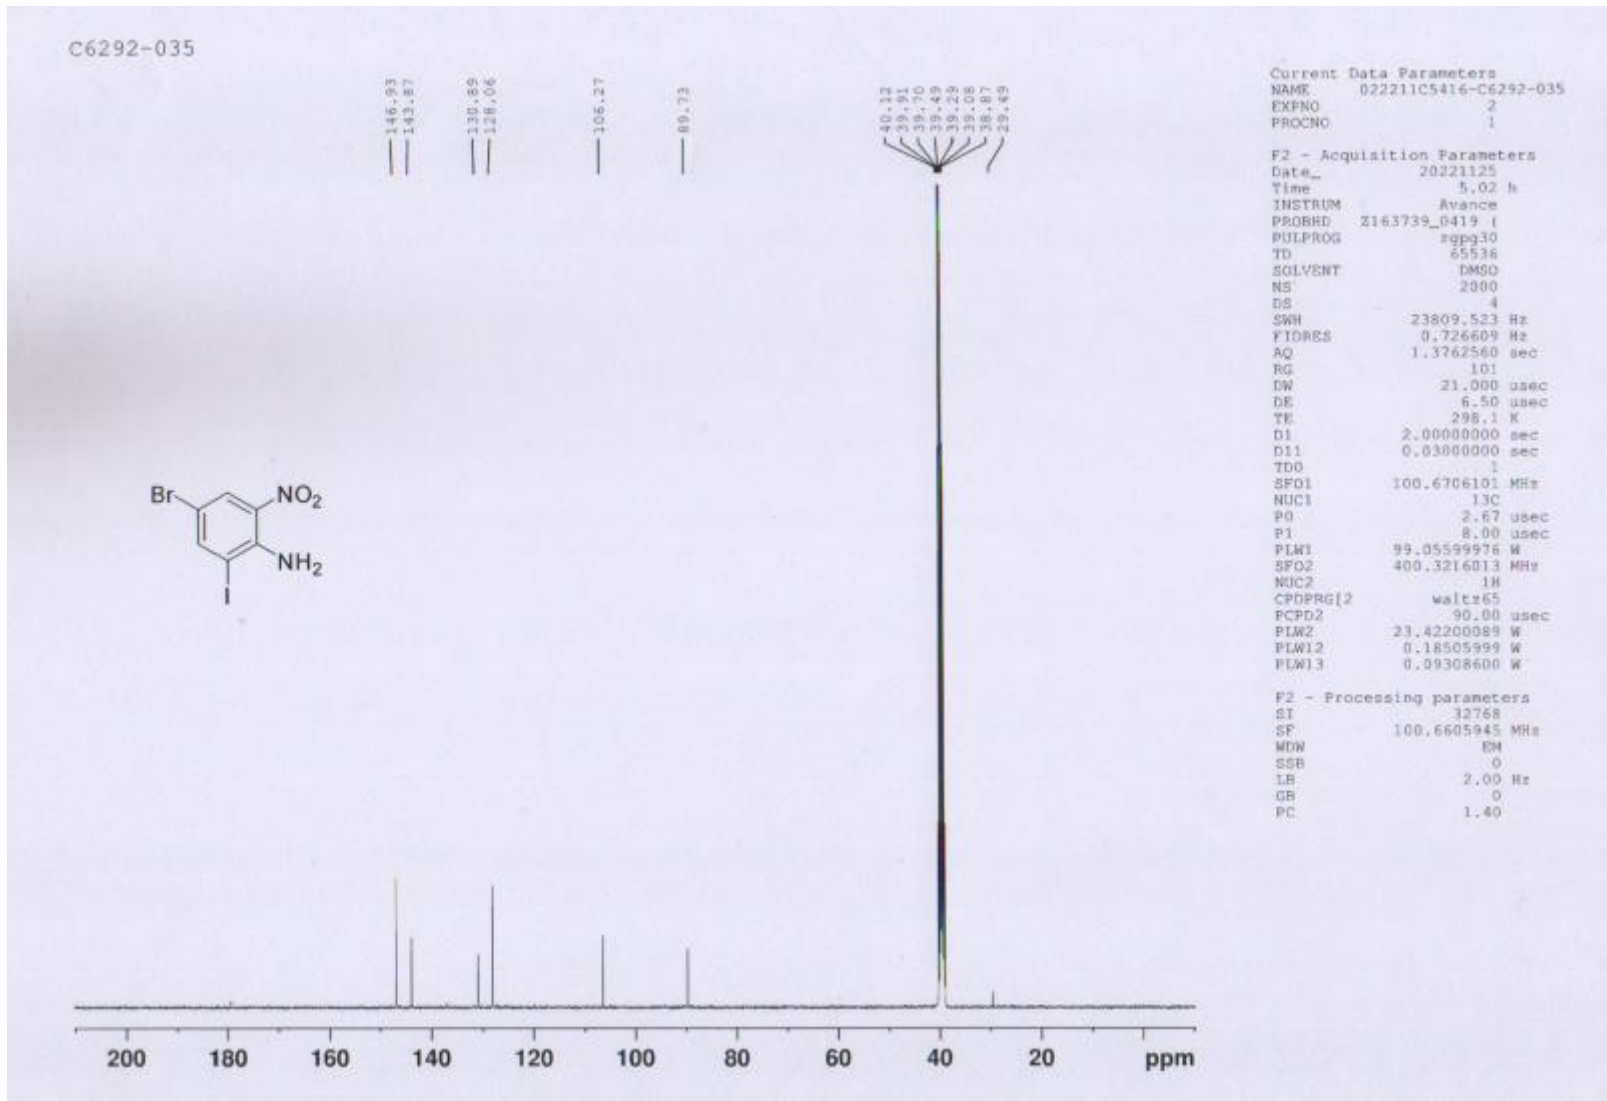

C6292-035

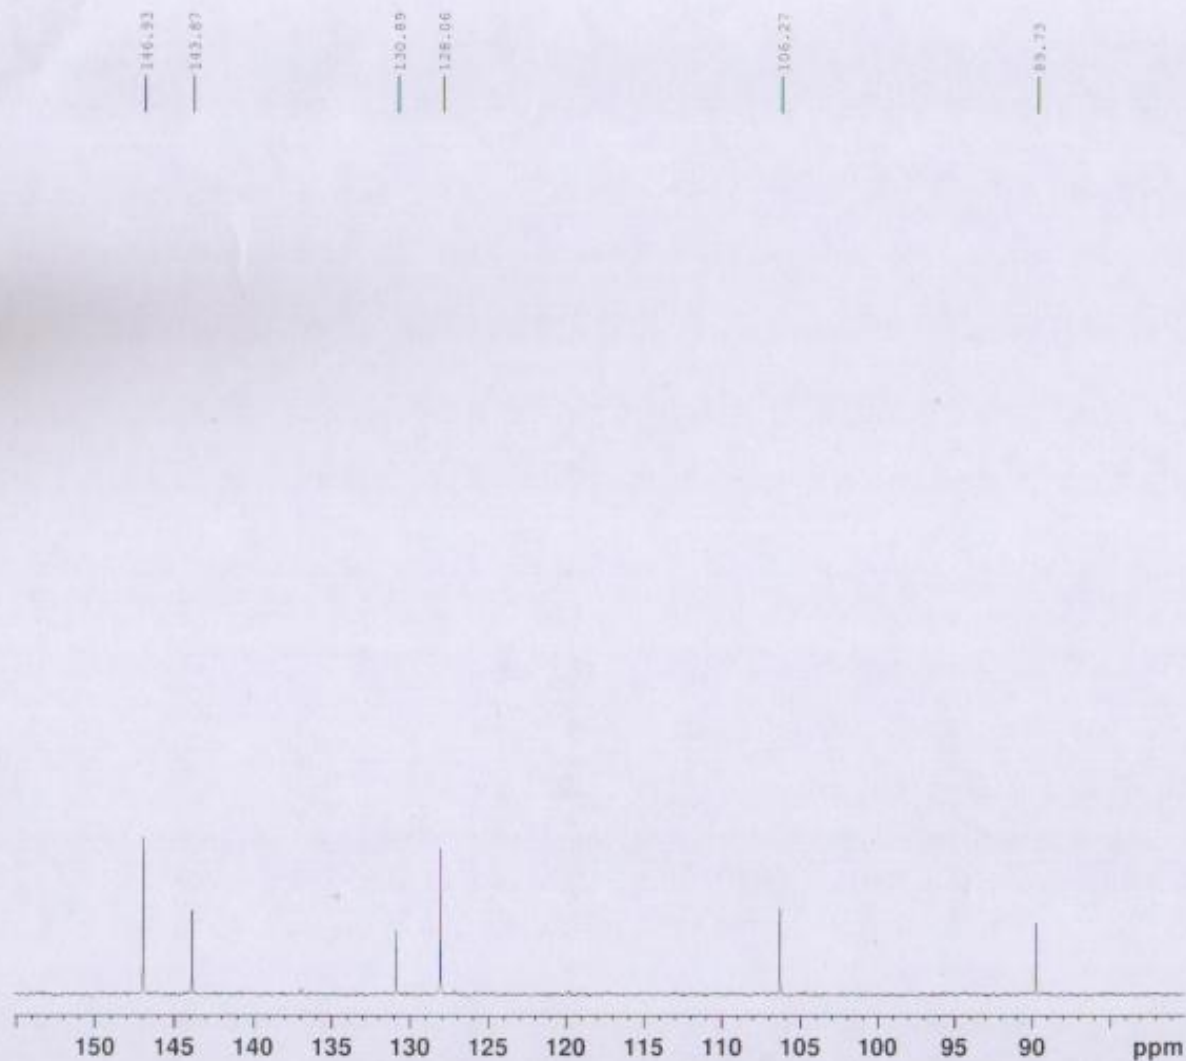

Current Data Parameters  
NAME 022211C5416-C6292-035  
EXPNO 2  
PROCNO 1

F2 - Acquisition Parameters  
Date\_ 20221125  
Time 5.02 h  
INSTRUM Avance  
PROBHD 2163739\_0419 (4  
PULPROG zgpg30  
TD 65536  
SOLVENT DMSO  
NS 2000  
DS 4  
SWH 23809.523 Hz  
FIDRES 0.726609 Hz  
AQ 1.3762560 sec  
RG 101  
DW 21.000 usec  
DE 6.50 usec  
TE 298.1 K  
D1 2.0000000 sec  
D11 0.9300000 sec  
TD0 1  
SFO1 100.6706101 MHz  
NUC1 13C  
P0 2.67 usec  
P1 8.00 usec  
PLW1 89.05599876 W  
SFO2 400.3216813 MHz  
NUC2 1H  
CPOPRG12 waltz65  
PCPD2 90.00 usec  
PLW2 23.42200089 W  
PLW12 0.18505999 W  
PLW13 0.09308600 W

F2 - Processing parameters  
SI 32768  
SF 100.6605945 MHz  
WDW EM  
SSB 0  
LB 2.00 Hz  
GB 0  
PC 1.40

# LCMS of 4-Bromo-2-iodo-6-nitroaniline (2)

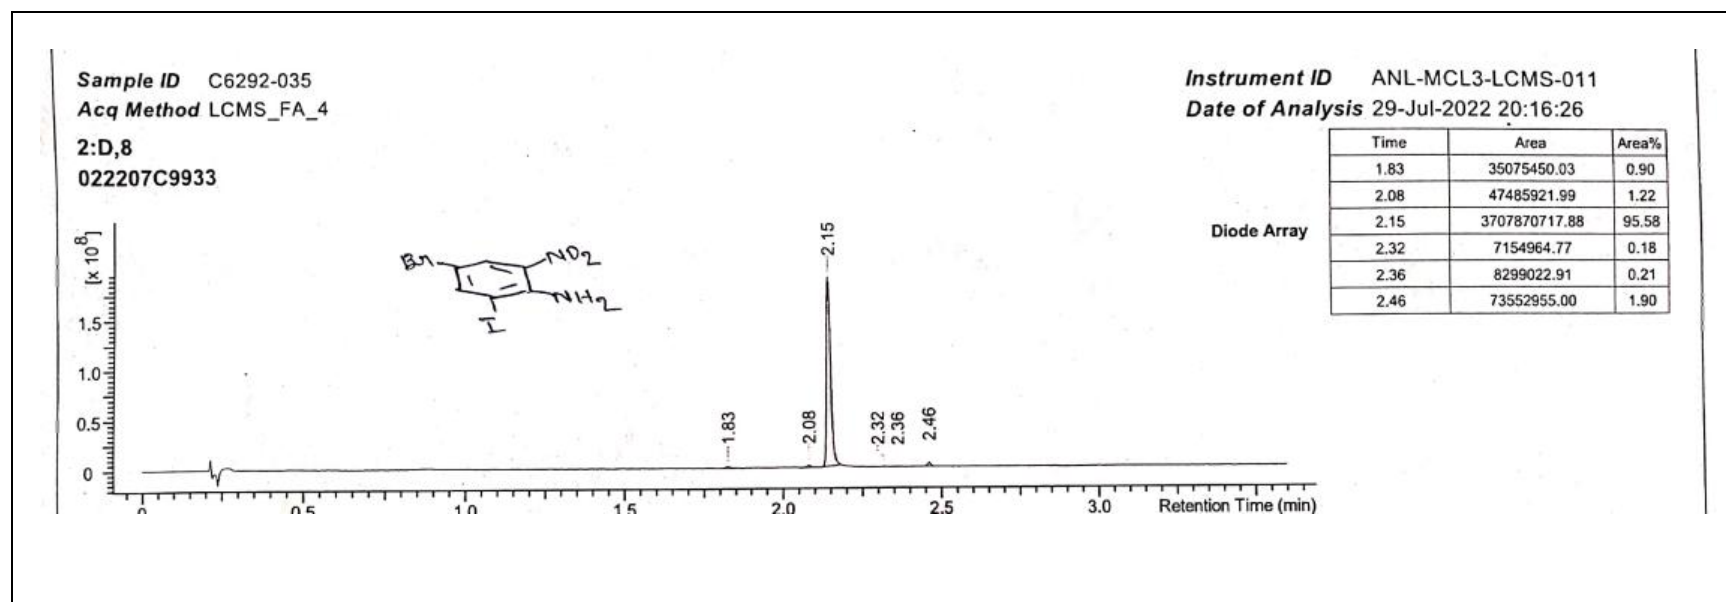

Acq Method LCMS\_FA\_4

2:D,8

022207C9933

Instrument ID ANL-MCL3-LCMS-011

Date of Analysis 29-Jul-2022 20:16:26

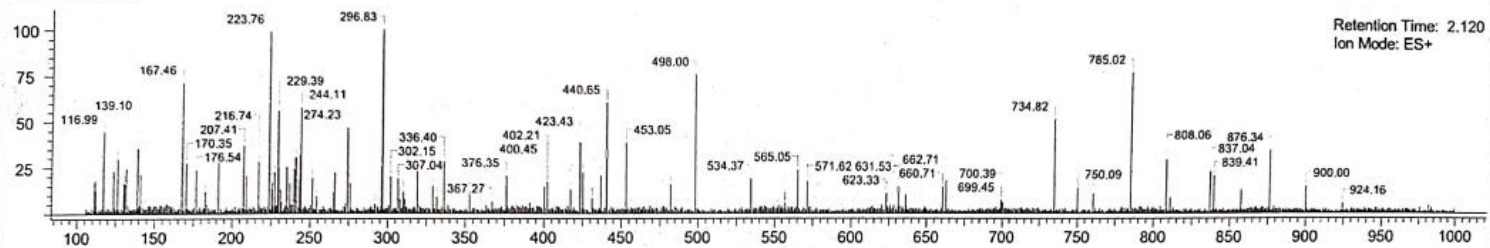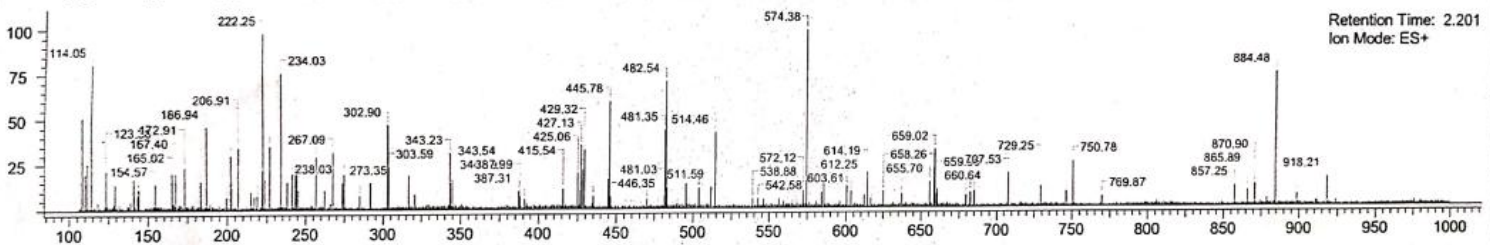

# <sup>1</sup>H NMR of 5-Bromo-4'-methoxy-3-nitro-[1,1'-biphenyl]-2-amine (4)

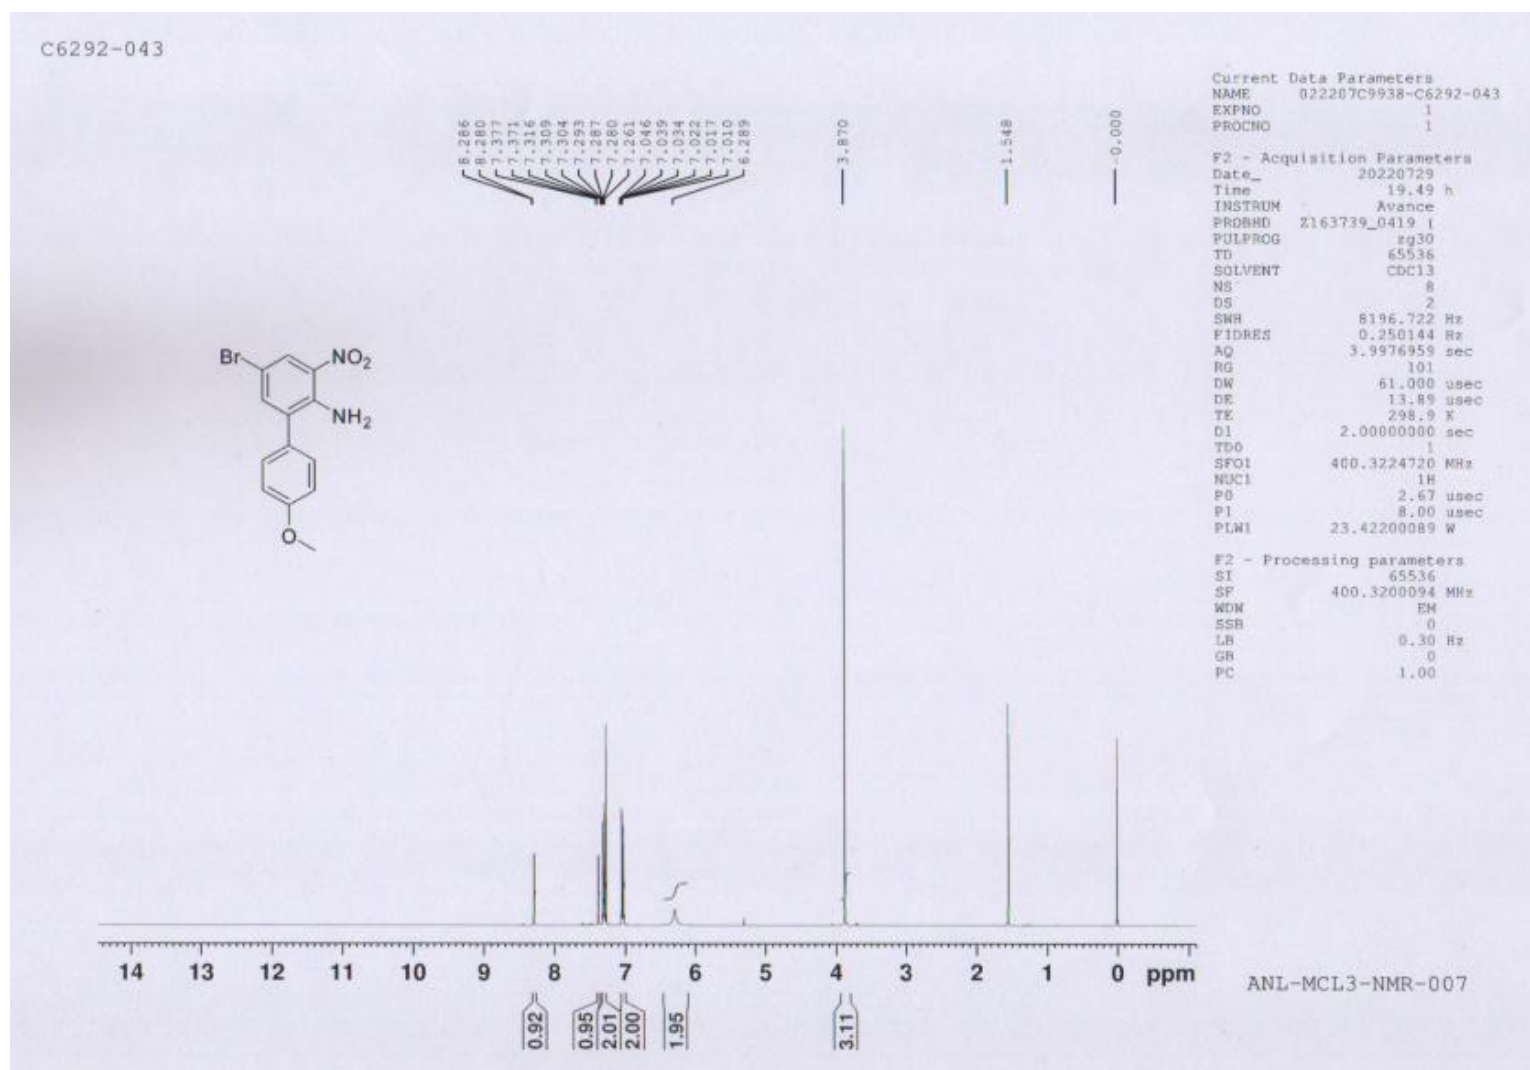



C6292-043

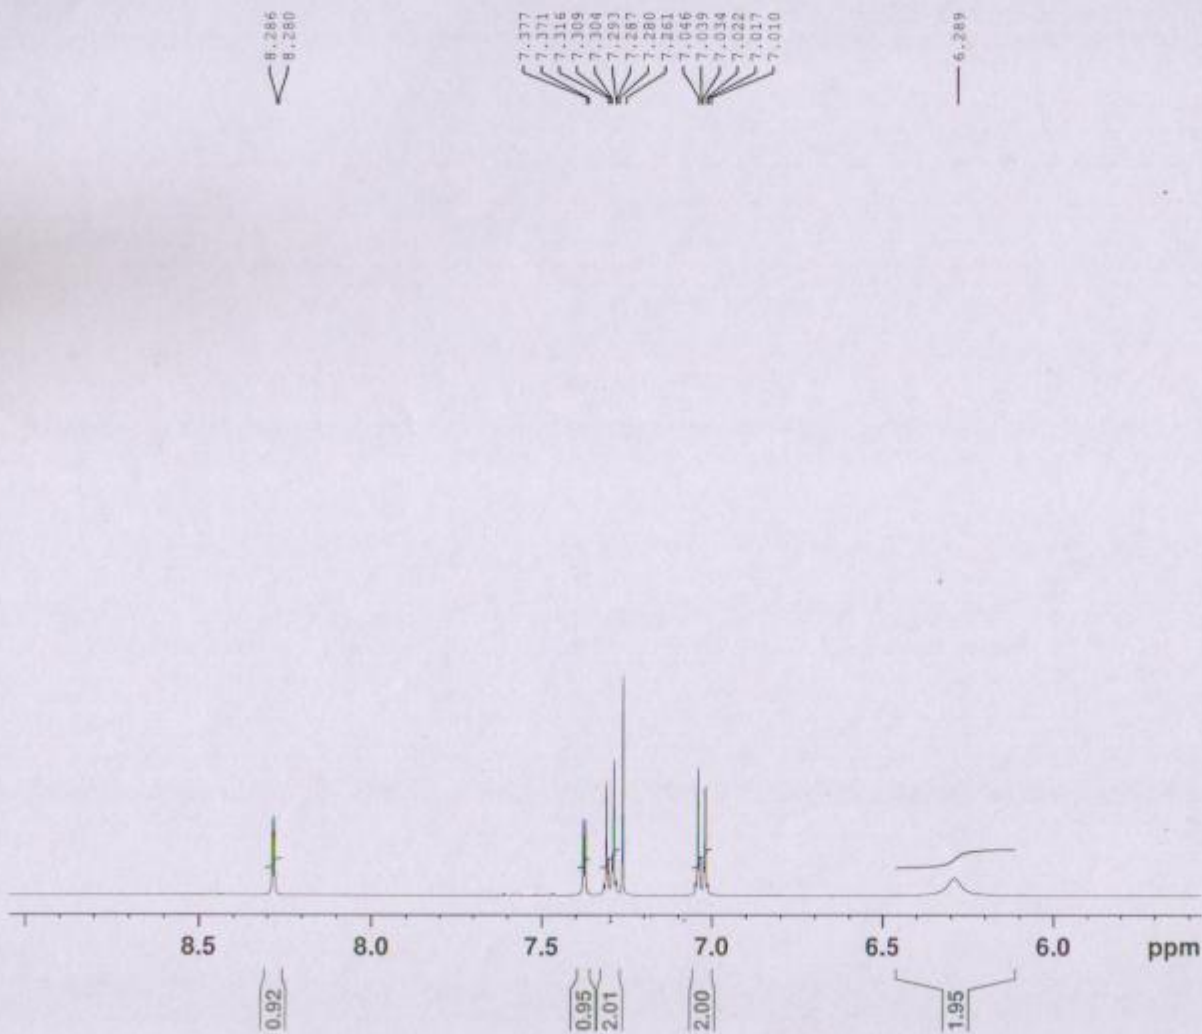

Current Data Parameters  
NAME 022207C9938-C6292-043  
EXPNO 1  
PROCNO 1

F2 - Acquisition Parameters  
Date\_ 20220729  
Time 19.49 h  
INSTRUM Avance  
PROBHD Z163739\_0419 (   
PULPROG zg30  
TD 65536  
SOLVENT CDC13  
NS 8  
DS 2  
SWH 8196.722 Hz  
FIDRES 0.250144 Hz  
AQ 3.9976959 sec  
RG 101  
DW 61.000 usec  
DE 13.89 usec  
TE 298.9 K  
D1 2.00000000 sec  
TD0 1  
SFO1 400.3224720 MHz  
NUC1 1H  
P0 2.67 usec  
P1 8.00 usec  
PLW1 23.42200089 W

F2 - Processing parameters  
SI 65536  
SF 400.3200094 MHz  
WDW EM  
SSB 0  
LB 0.30 Hz  
GB 0  
PC 1.00

ANL-MCL3-NMR-007

C6292-043

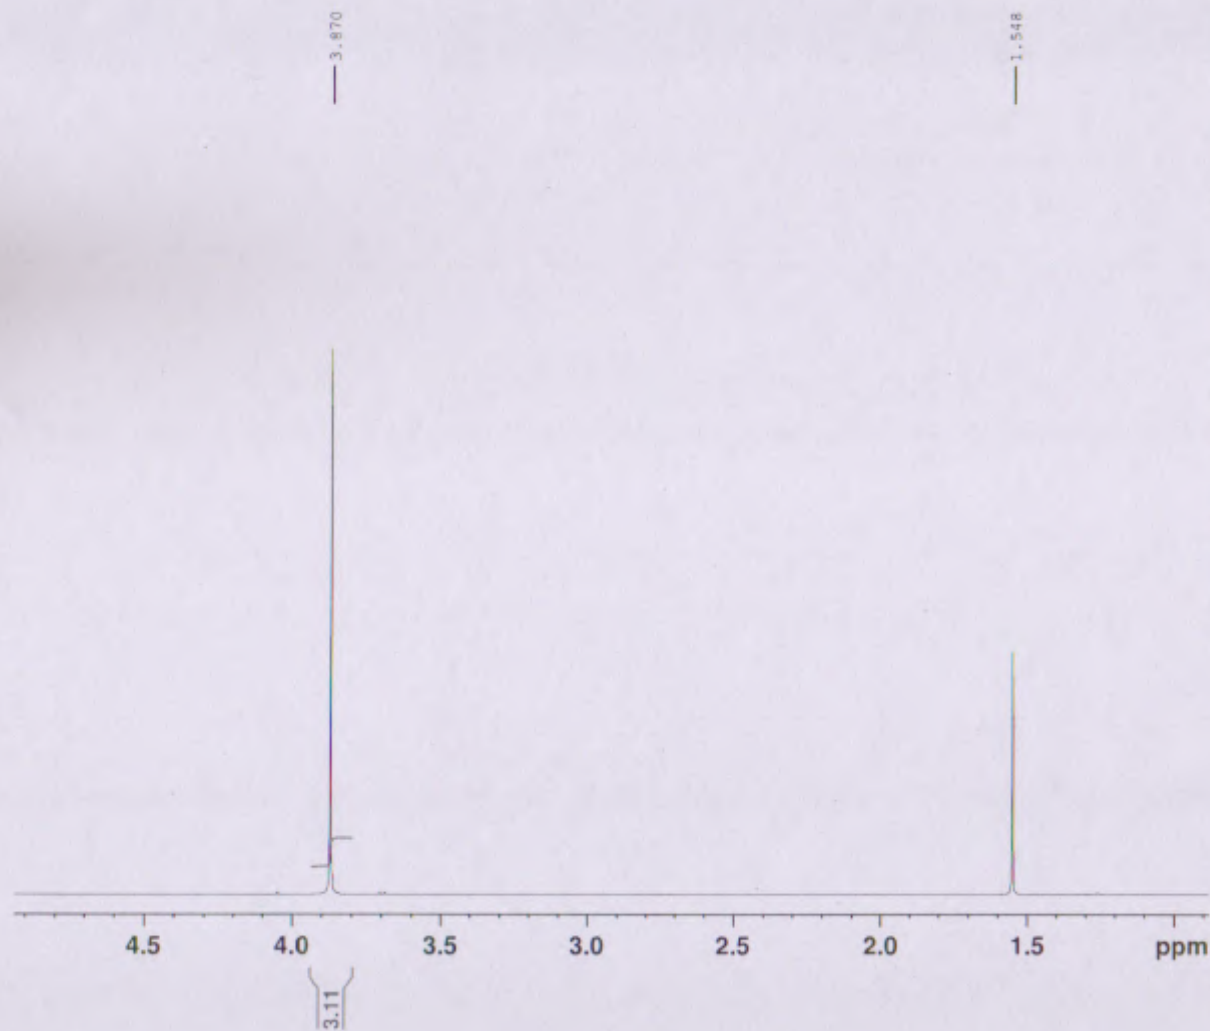

Current Data Parameters  
NAME 022207C9938-C6292-043  
EXPNO 1  
PROCNO 1

F2 - Acquisition Parameters  
Date\_ 20220729  
Time 19.49 h  
INSTRUM Avance  
PROBHD Z163739\_0419 (   
PULPROG zg30  
TD 65536  
SOLVENT CDC13  
NS 8  
DS 2  
SWH 8196.722 Hz  
FIDRES 0.250144 Hz  
AQ 3.9976959 sec  
RG 101  
DM 61.000 usec  
DE 13.89 usec  
TE 298.9 K  
D1 2.00000000 sec  
TDO 1  
SFO1 400.3224720 MHz  
NUC1 1H  
PO 2.67 usec  
P1 8.00 usec  
PLW1 23.42200089 W

F2 - Processing parameters  
SI 65536  
SF 400.320094 MHz  
WDW EM  
SSB 0  
LB 0.30 Hz  
GB 0  
PC 1.00

ANL-MCL3-NMR-007

# 13C NMR of 5-Bromo-4'-methoxy-3-nitro-[1,1'-biphenyl]-2-amine (4)

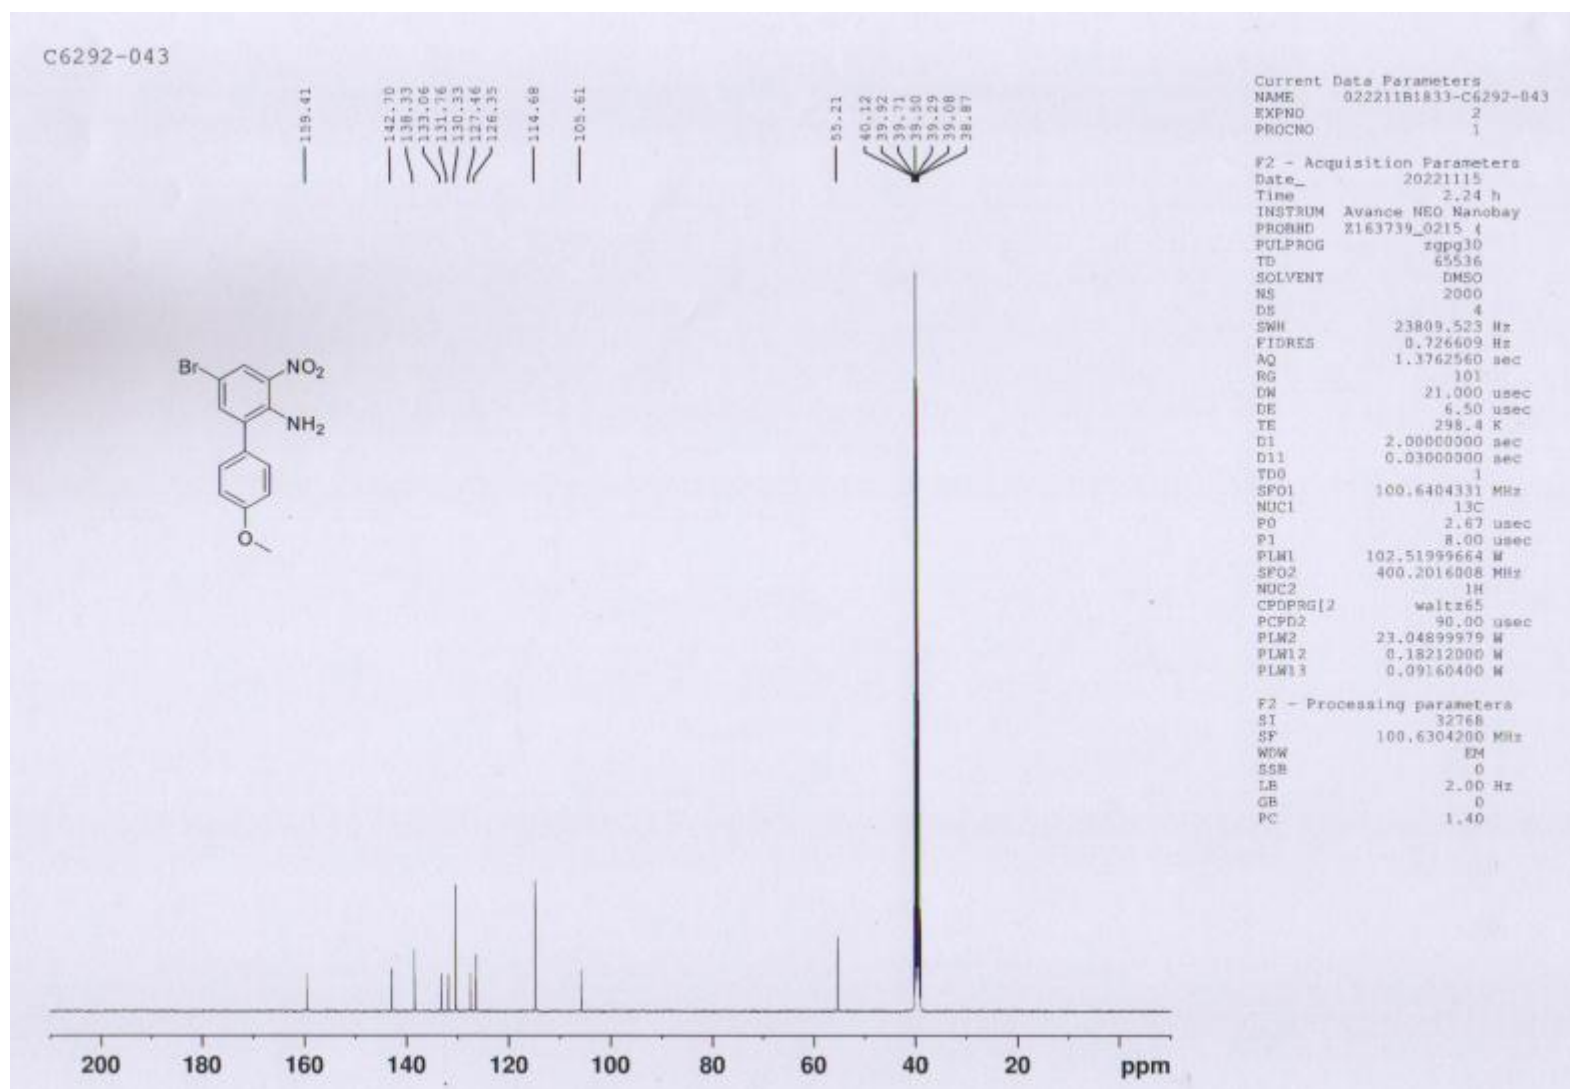

C6292-043

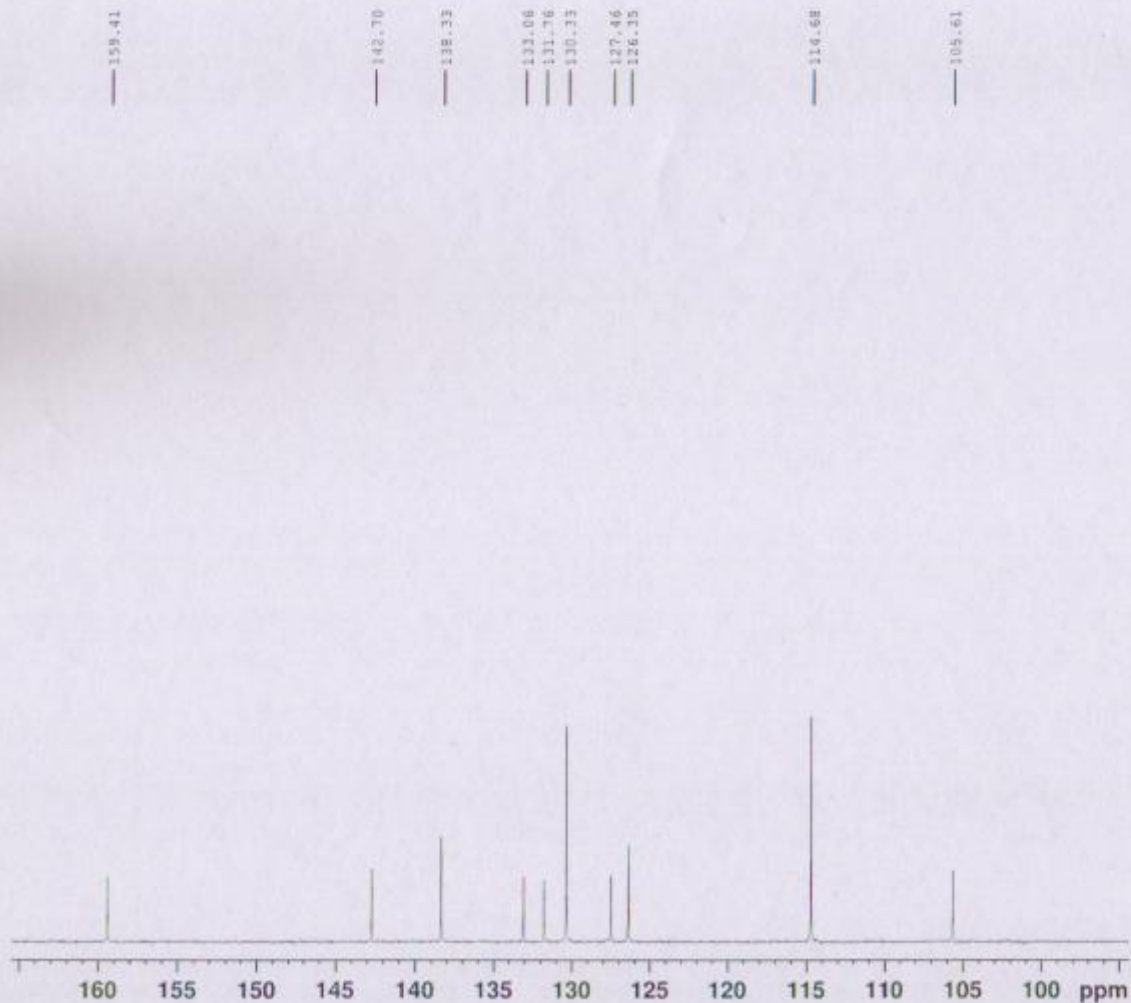

Current Data Parameters  
NAME 022211P1833-C6292-043  
EXPNO 2  
PROCNO 1

F2 - Acquisition Parameters  
Date\_ 20221115  
Time 2.24 h  
INSTRUM Avance NEO Nanobay  
PROBHD Z163739\_0215 (4  
PULPROG zgpg30  
TD 65536  
SOLVENT DMSO  
NS 2000  
DS 4  
SWH 23809.523 Hz  
FIDRES 0.726609 Hz  
AQ 1.3762560 sec  
RG 101  
DW 21.090 usec  
DE 6.50 usec  
TE 298.4 K  
D1 2.0000000 sec  
D11 0.0300000 sec  
TDO 1  
SFO1 100.6404331 MHz  
NUC1 13C  
FO 3.67 usec  
F1 8.00 usec  
PLW1 102.51999664 W  
SFO2 400.2016008 MHz  
NUC2 1H  
CPDPRG12 waltz65  
PCPD2 90.00 usec  
PLW2 23.04899979 W  
PLW12 0.18212000 W  
PLW13 0.09160400 W

F2 - Processing parameters  
SI 32768  
SF 100.6304200 MHz  
WDW EM  
SSB 0  
LB 2.00 Hz  
GB 0  
PC 1.40

C6292-043

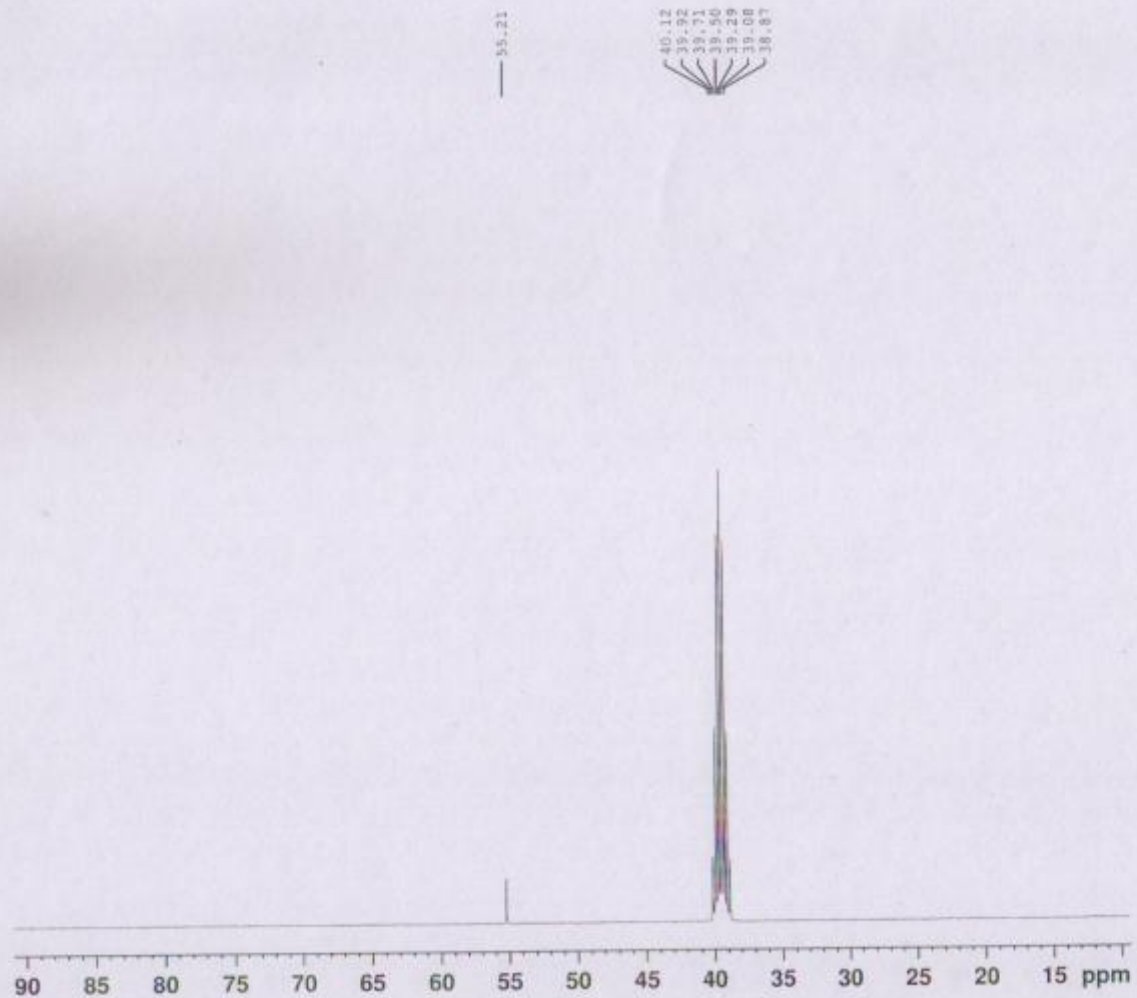

Current Data Parameters  
NAME 022211N1833-C6292-043  
EXPNO 2  
PROCNO 1

F2 - Acquisition Parameters  
Date\_ 20221115  
Time 2.24 h  
INSTRUM Avance NEO Nanobay  
PROBHD X163719\_0215 (1  
PULPROG zgpg30  
TD 65536  
SOLVENT DMSO  
NS 2000  
DS 4  
SNU 23909.523 Hz  
FIDRES 0.728609 Hz  
AQ 1.1762560 sec  
RG 101  
DW 21.000 usec  
DE 6.50 usec  
TE 298.4 K  
SI 2.00000000 sec  
D11 0.03000000 sec  
TDO 1  
SFO1 100.6404331 MHz  
NUC1 13C  
P0 2.67 usec  
P1 8.00 usec  
PLW1 102.51999664 W  
SFO2 400.2016008 MHz  
NUC2 1H  
CPDPRG2 waltz65  
PCPD2 90.00 usec  
PLW2 23.04899979 W  
PLW12 0.18212000 W  
PLW13 0.05160400 W

F2 - Processing parameters  
SI 32768  
SF 100.6304200 MHz  
WDW EM  
SSB 0  
LB 2.00 Hz  
GB 0  
PC 1.40

# LCMS of 5-Bromo-4'-methoxy-3-nitro-[1,1'-biphenyl]-2-amine (4)

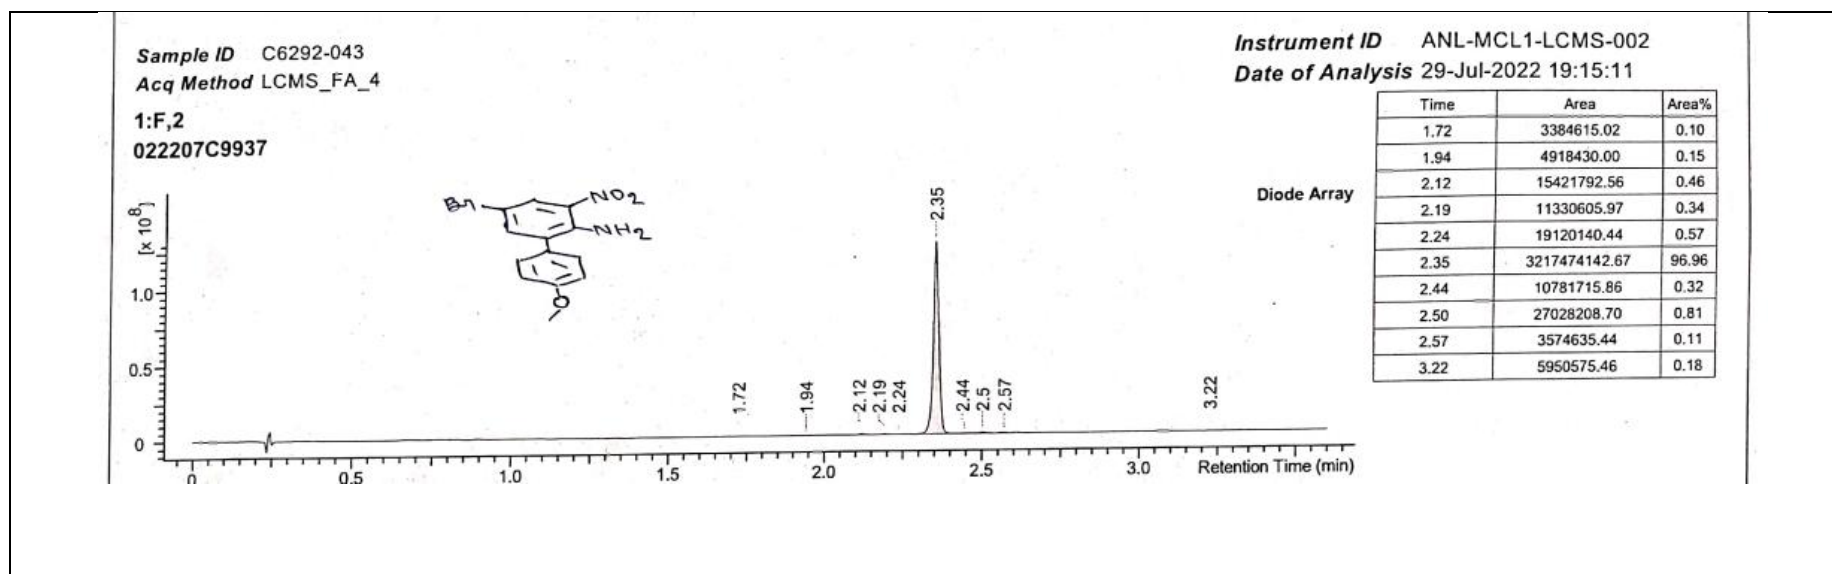

Sample ID C6292-043  
Acq Method LCMS\_FA\_4

Discovery Chemistry Analytical Services

Instrument ID ANL-MCL1-LCMS-002  
Date of Analysis 29-Jul-2022 19:15:11

1:F,2  
022207C9937

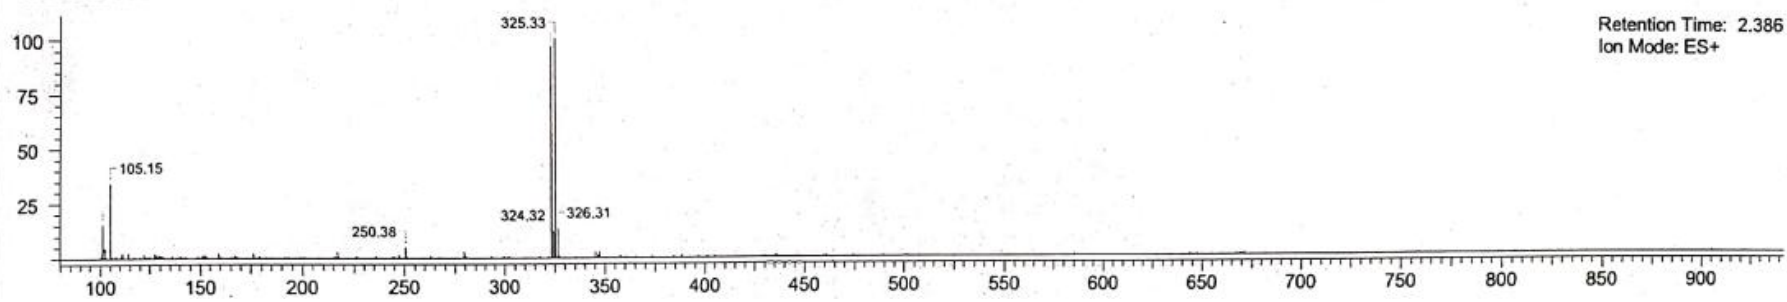

<sup>1</sup>H NMR of 5-Bromo-4'-methoxy-[1,1'-biphenyl]-2,3-diamine (5)

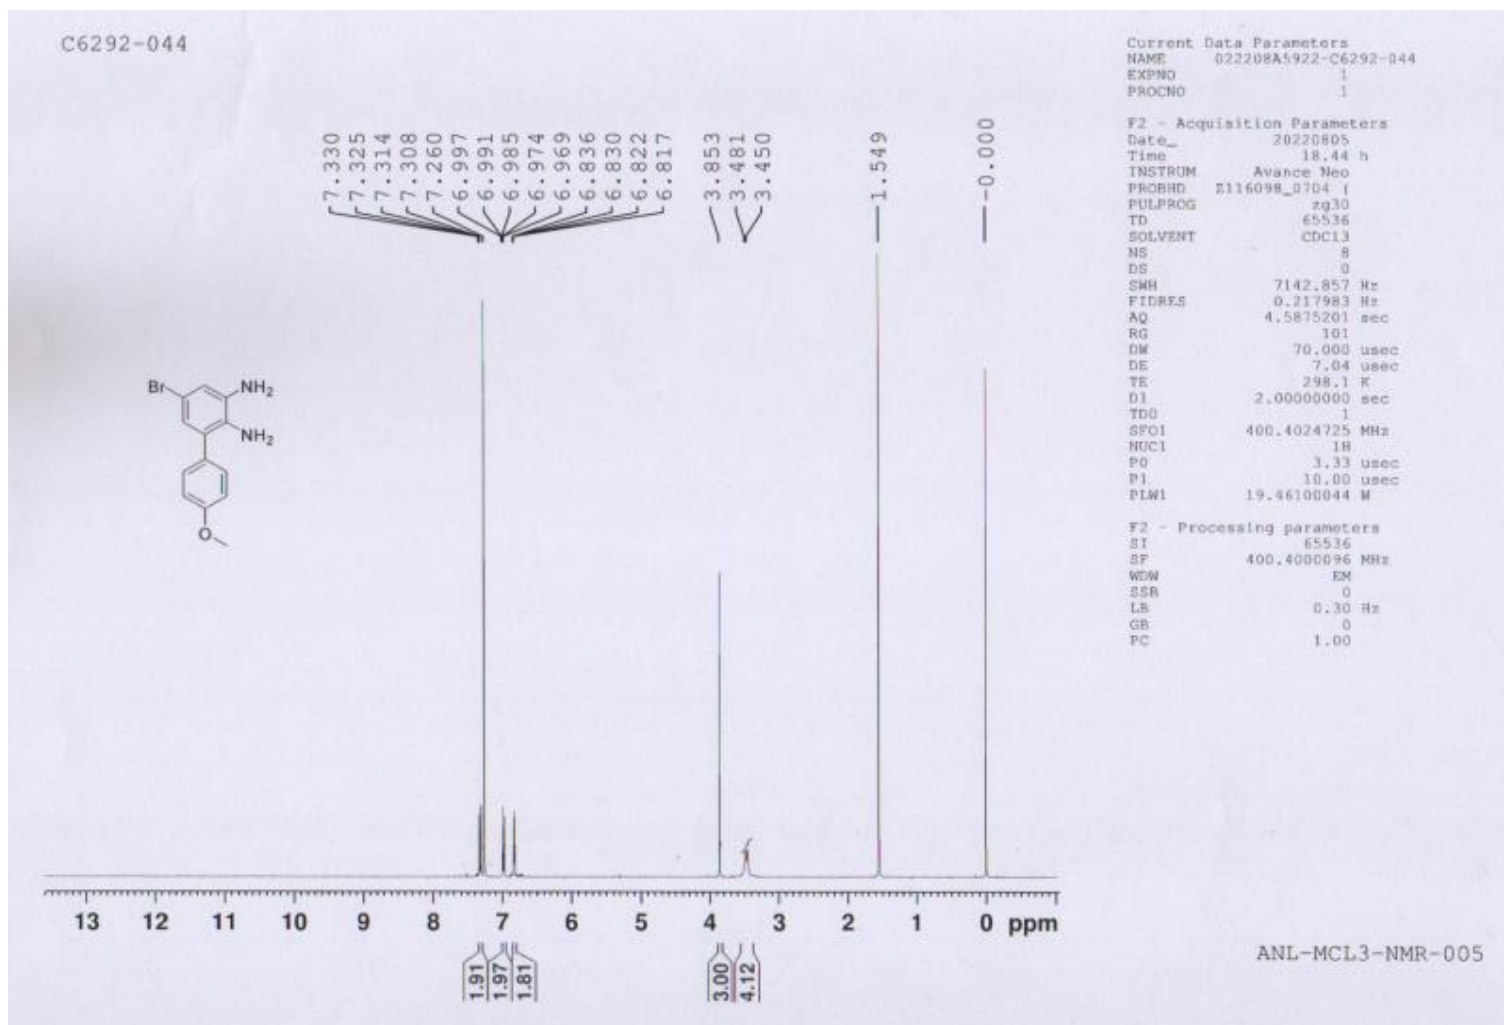





C6292-044

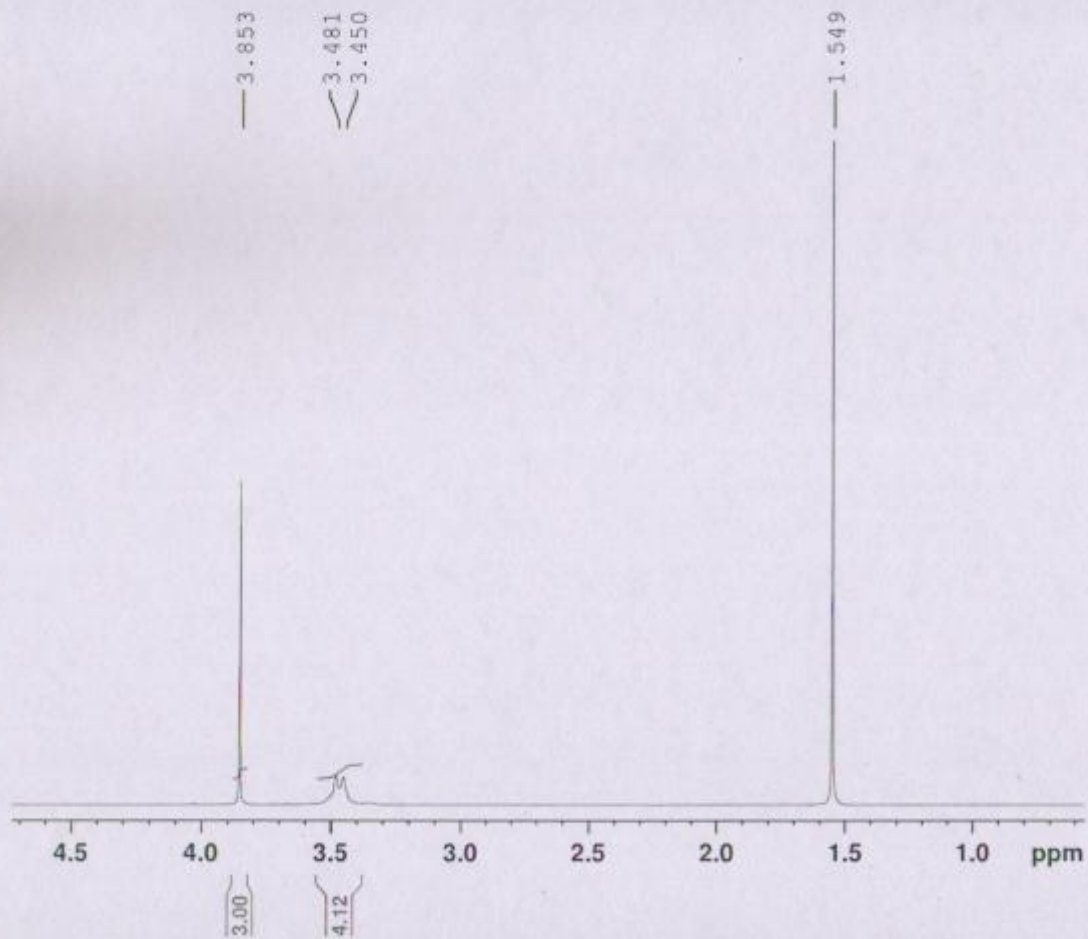

Current Data Parameters  
NAME 022208A5922-C6292-044  
EXPNO 1  
PROCNO 1

F2 - Acquisition Parameters  
Date\_ 20220805  
Time 18.44 h  
INSTRUM Avance Neo  
PROBHD X116098\_0704 (   
PULPROG zg30  
TD 65536  
SOLVENT CDCl3  
NS 8  
DS 0  
SWH 7142.857 Hz  
FIDRES 0.217983 Hz  
AQ 4.5875201 sec  
RG 101  
DW 70.000 usec  
DE 7.04 usec  
TE 298.1 K  
D1 2.0000000 sec  
TDO 1  
SFO1 400.4024725 MHz  
NUC1 1H  
P0 3.33 usec  
P1 10.00 usec  
PLWI 19.46100044 W

F2 - Processing parameters  
SI 65536  
SF 400.4000096 MHz  
WDW EM  
SSB 0  
LB 0.30 Hz  
GB 0  
PC 1.00

ANL-MCL3-NMR-005

# 13C NMR of 5-Bromo-4'-methoxy-[1,1'-biphenyl]-2,3-diamine (5)

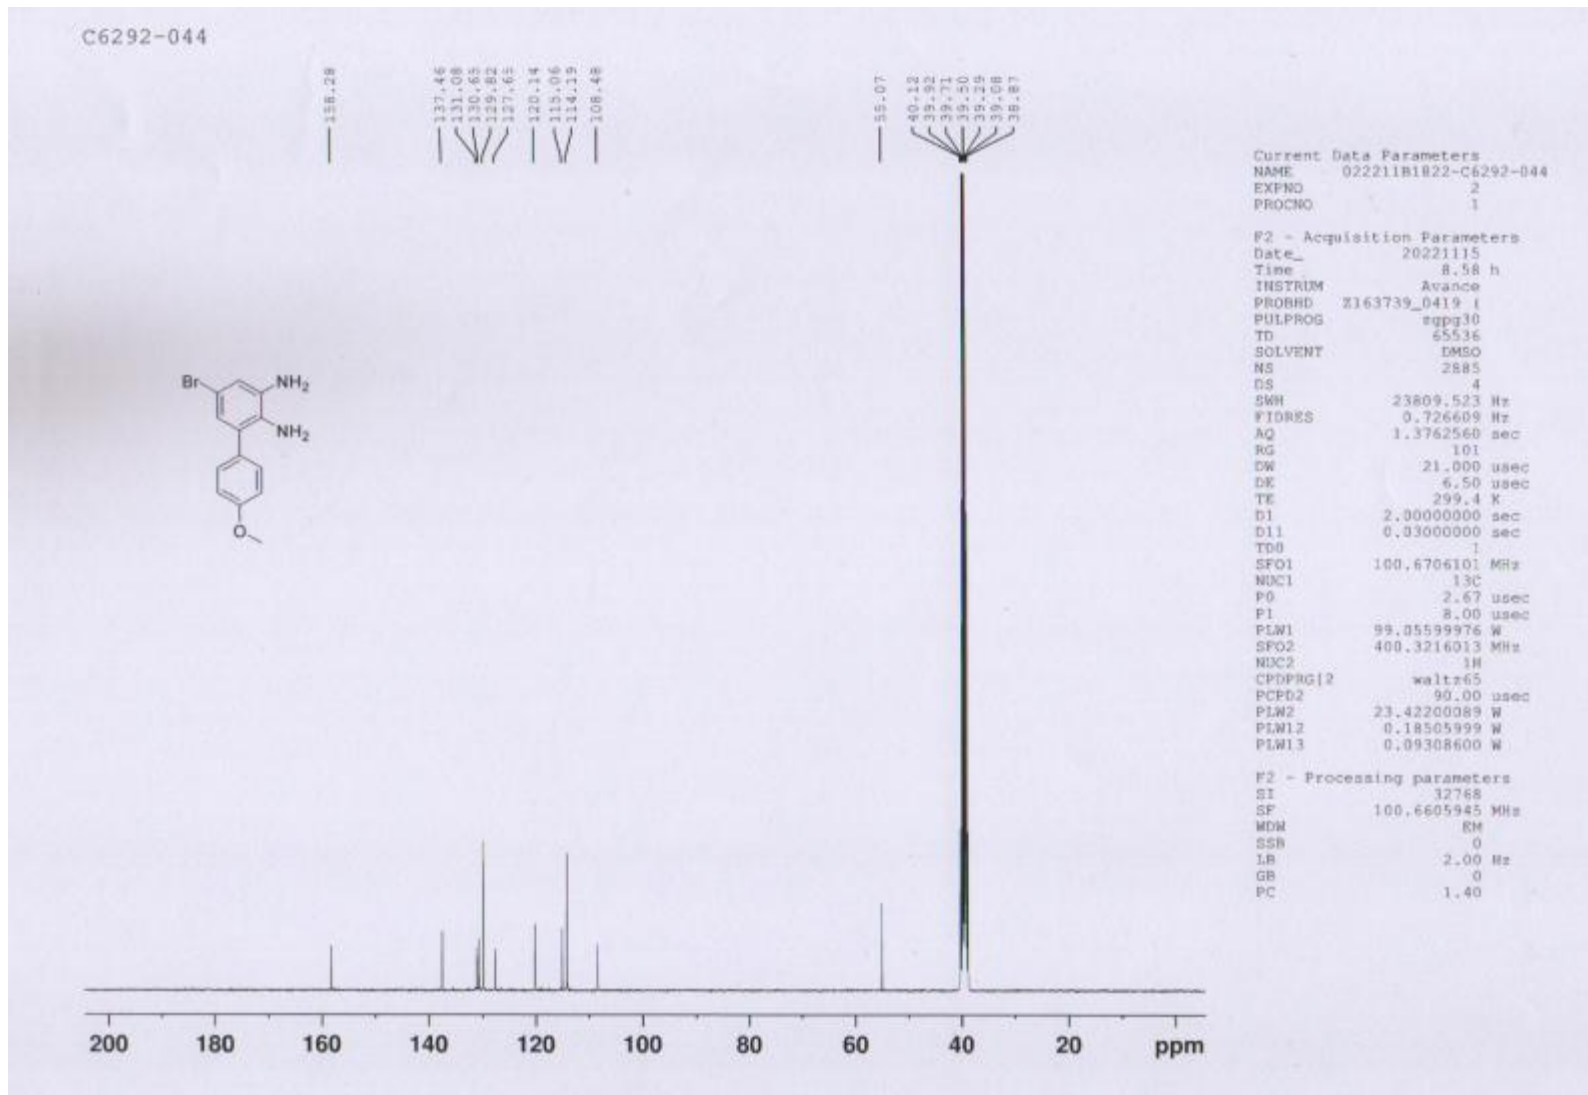

C6292-044

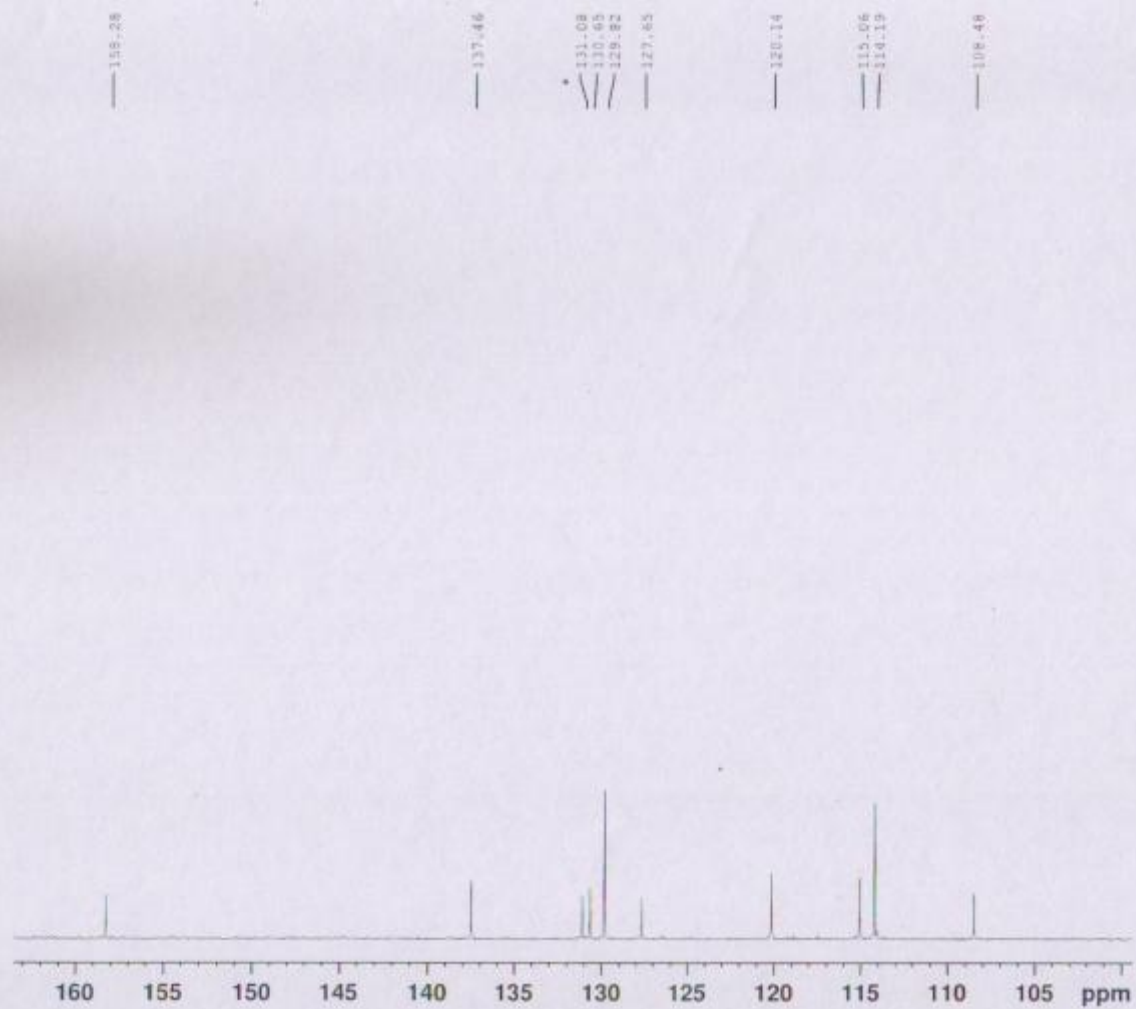

Current Data Parameters  
NAME 02221181822-C6292-044  
EXPNO 2  
PROCNO 1

F2 - Acquisition Parameters  
Date\_ 20221115  
Time 8.58 h  
INSTRUM Avance  
PROBHD Z163739\_0419 f  
PULPROG zgpg30  
TD 65536  
SOLVENT DMSO  
NS 2885  
DS 4  
SWH 23809.523 Hz  
FIDRES 0.726609 Hz  
AQ 1.3762560 sec  
RG 101  
DM 21.000 usec  
DE 6.50 usec  
TE 299.4 K  
D1 2.0000000 sec  
D11 0.0300000 sec  
TDO 1  
SFO1 100.6706101 MHz  
NUC1 13C  
PQ 2.67 usec  
PI 5.00 usec  
PLW1 99.05599976 M  
SFO2 400.3216013 MHz  
NUC2 1H  
CPDPRG12 waltz65  
PCPD2 90.00 usec  
PLW2 23.42200089 M  
PLW12 0.18505999 M  
PLW13 0.09308600 M

F2 - Processing parameters  
SI 32768  
SF 100.6605945 MHz  
WDW EM  
SSB 0  
LB 2.00 Hz  
GB 0  
PC 1.40

C6292-044

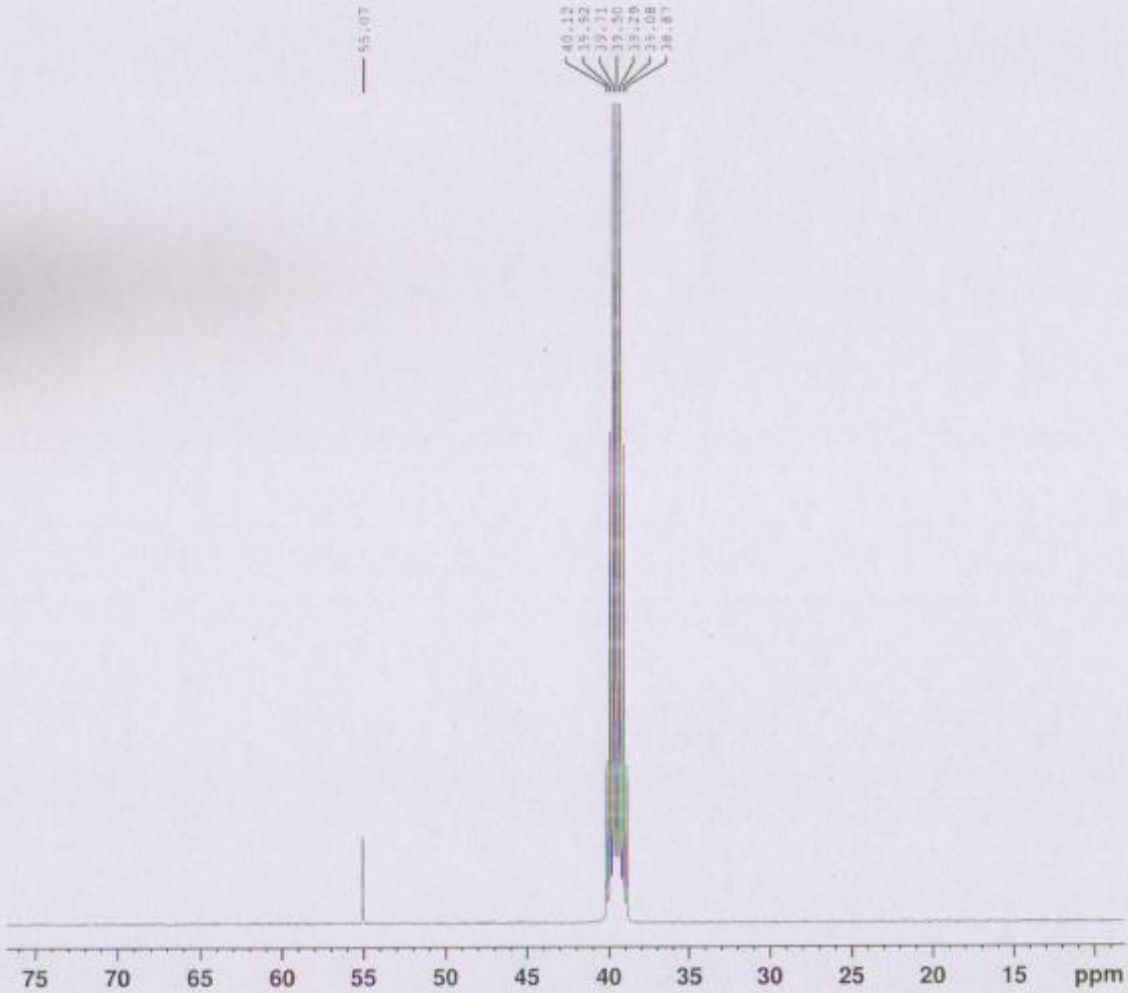

Current Data Parameters  
NAME 022211B1822-C6292-044  
EXPNO 2  
PROCNO 1

F2 - Acquisition Parameters  
Date\_ 20221115  
Time 8.58 h  
INSTRUM Avance  
PROBHD Z163739\_0419 (   
PULPROG zgpg30  
TD 65536  
SOLVENT DMSO  
NS 3885  
DS 4  
SWH 23809.523 Hz  
FIDRES 0.726609 Hz  
AQ 1.3762550 sec  
RG 101  
DW 21.000 usec  
DE 6.50 usec  
TE 299.4 K  
O1 2.00000000 sec  
O11 0.03000000 sec  
TDO 1  
SFO1 100.6706101 MHz  
NUC1 13C  
P0 2.67 usec  
P1 8.00 usec  
PLW1 99.05599976 W  
SFO2 400.3216013 MHz  
NUC2 1H  
CPOPRG12 waltz85  
PCPD2 90.00 usec  
PLW2 23.4220089 W  
PLW12 0.18505999 W  
PLW13 0.09308600 W

F2 - Processing parameters  
SI 32768  
SF 100.6605945 MHz  
WDW EM  
SSB 0  
LB 2.00 Hz  
GB 0  
PC 1.40

# LCMS of 5-Bromo-4'-methoxy-[1,1'-biphenyl]-2,3-diamine (5)

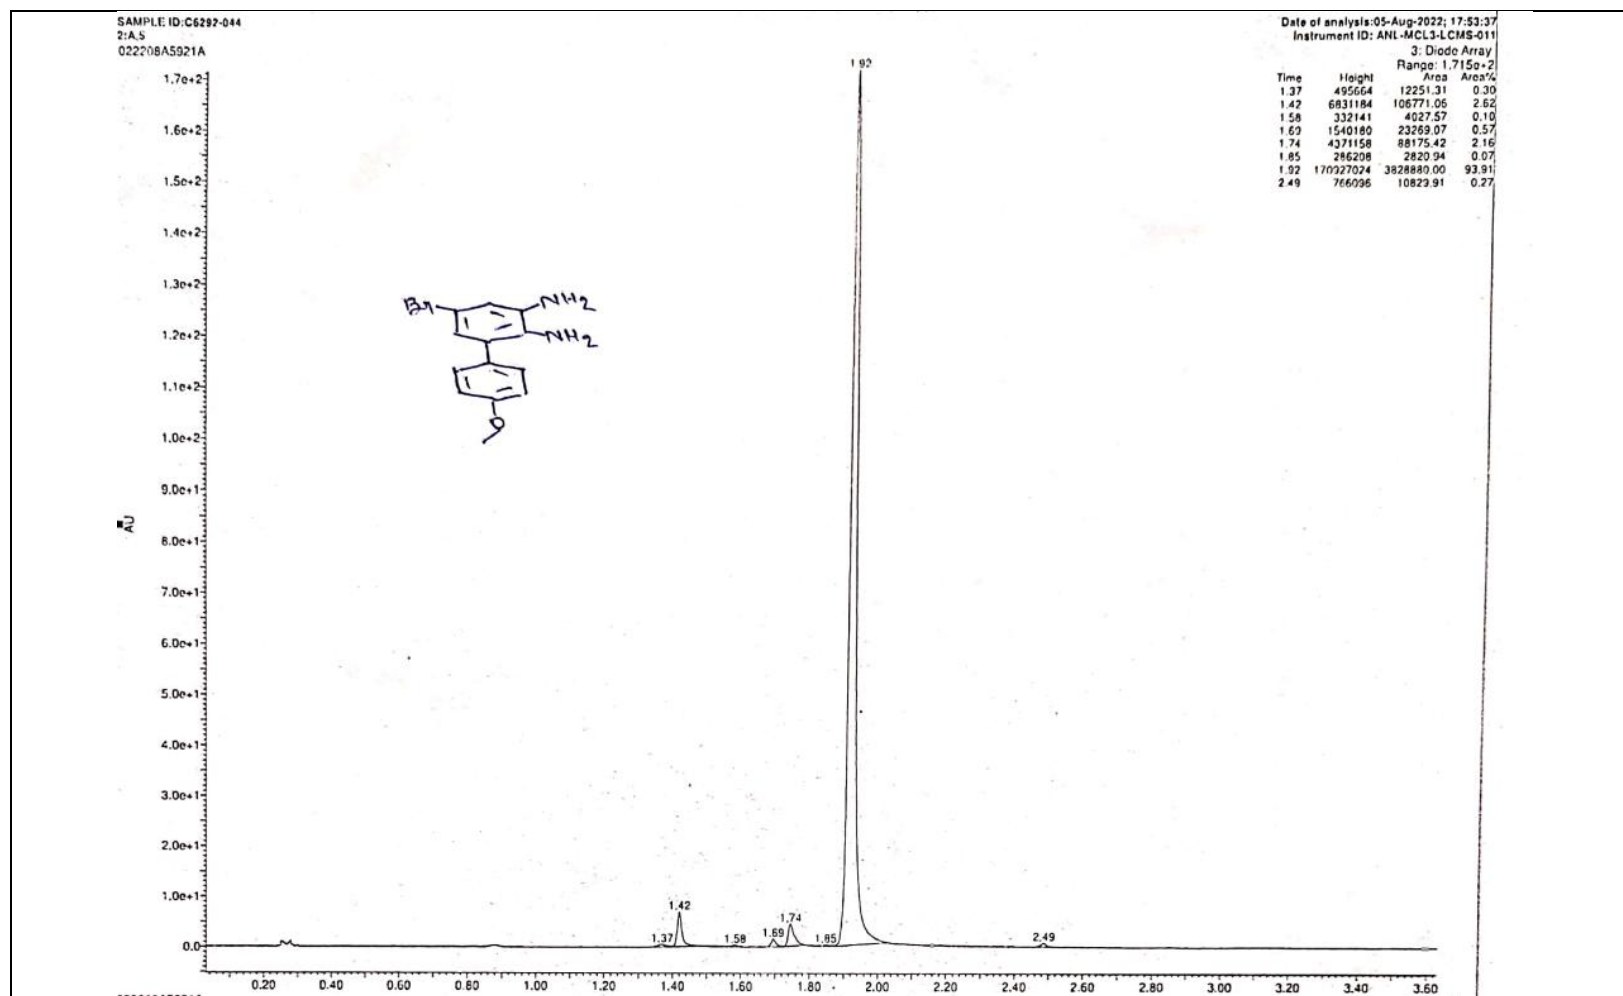

SAMPLE ID: C6292-044  
2:A.5  
022208A5921A 91 (1.936)

Date of analysis: 05-Aug-2022; 17:53:37  
Instrument ID: ANL-MCL3-LCMS-011  
1: MS2 ES+  
8.99e7

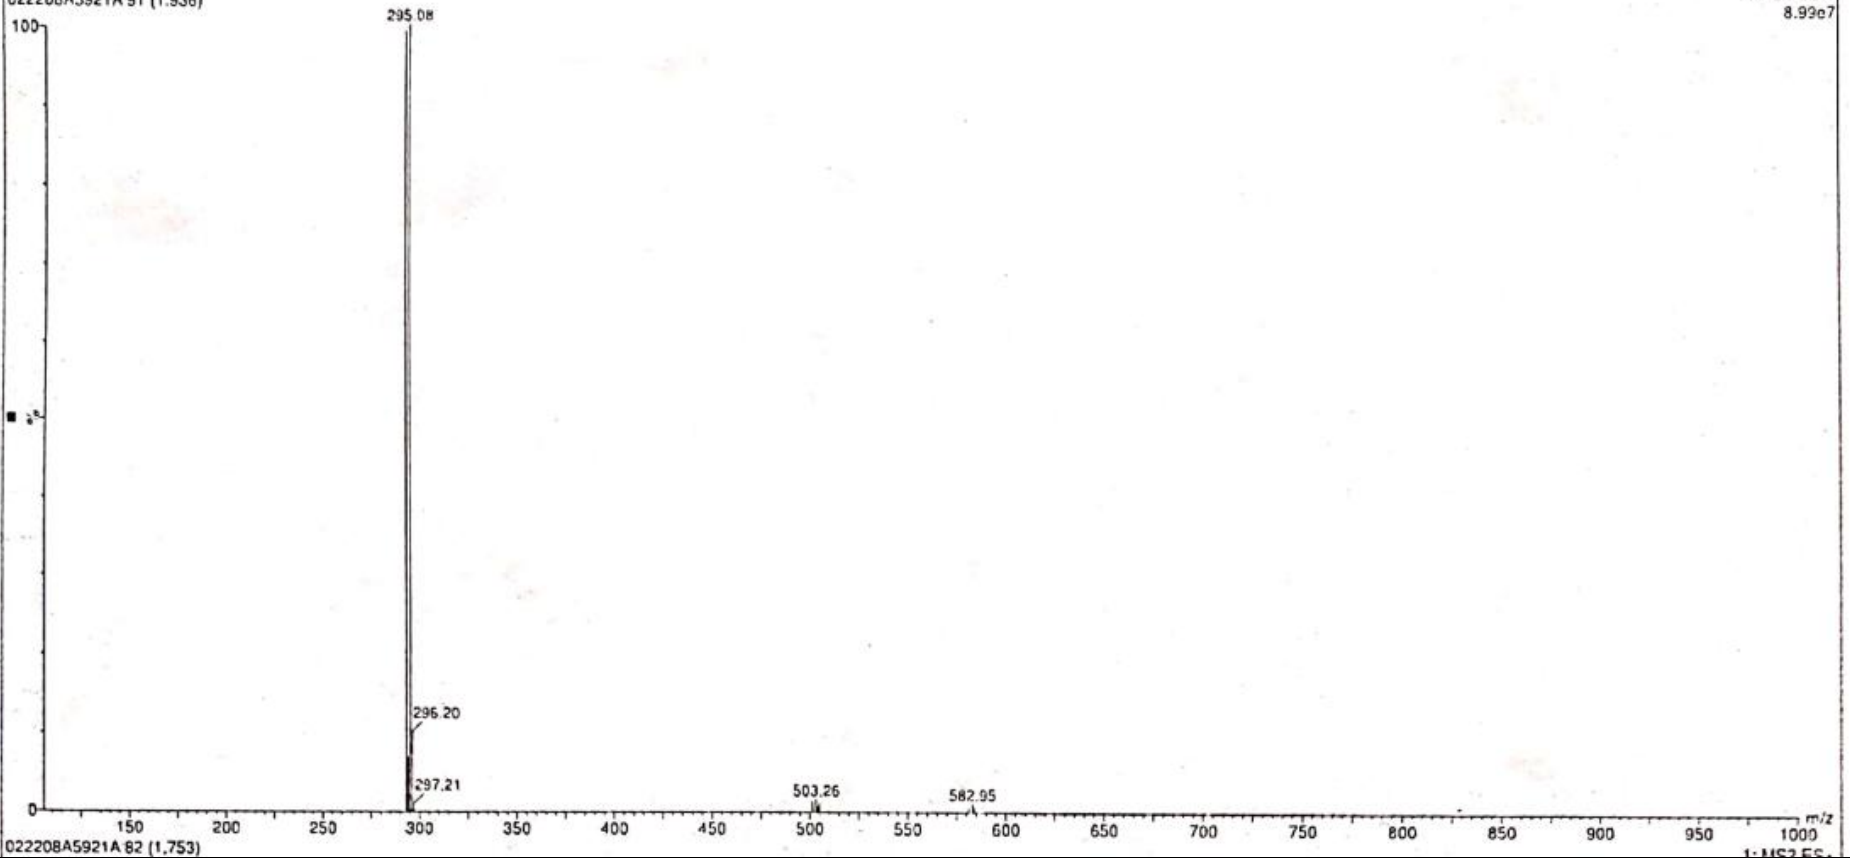

022208A5921A 82 (1.753)

1: MS2 ES+

# <sup>1</sup>H NMR of 6-Bromo-4-(4-methoxyphenyl)benzo[c][1,2,5]selenadiazole (6)

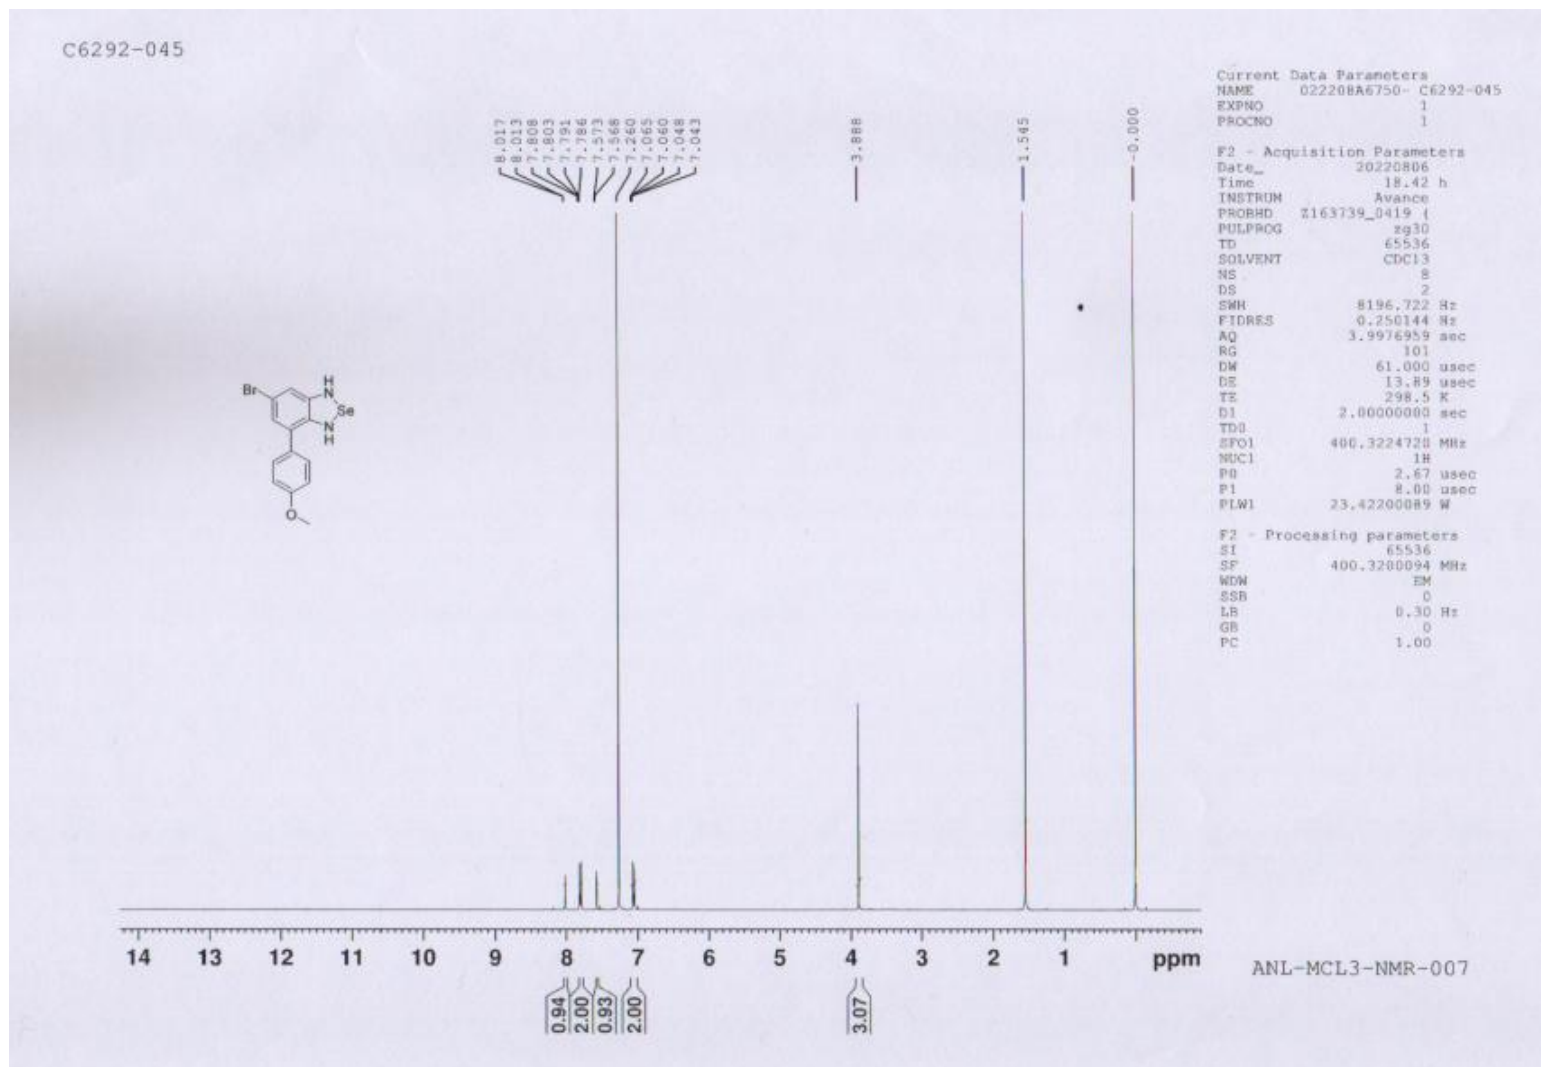



C6292-045

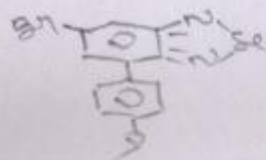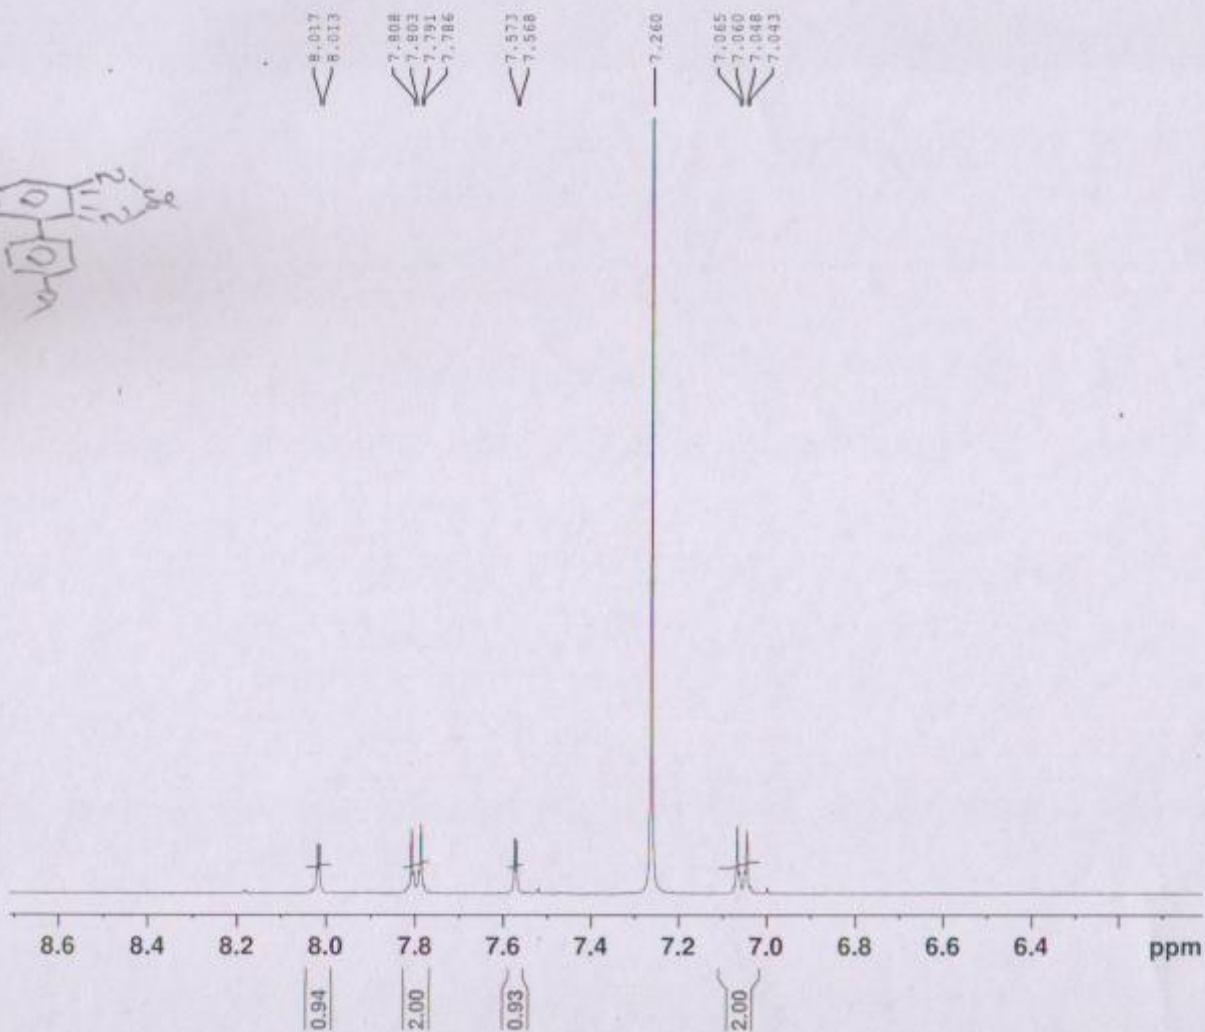

Current Data Parameters  
NAME 022208A6750- C6292-045  
EXPNO 1  
PROCNO 1

F2 - Acquisition Parameters  
Date\_ 20220806  
Time 18.42 h  
INSTRUM Avance  
PROBHD Z163739\_0419 (   
PULPROG zg30  
TD 65536  
SOLVENT CDCl3  
NS 8  
DS 2  
SWH 8196.722 Hz  
FIDRES 0.250144 Hz  
AQ 3.9976959 sec  
RG 101  
DN 61.000 usec  
DE 13.89 usec  
TE 298.5 K  
D1 2.00000000 sec  
TDO 1  
SFO1 400.3224720 MHz  
NUC1 1H  
PO 2.67 usec  
P1 8.00 usec  
PL1 23.42200089 W

F2 - Processing parameters  
SI 65536  
SF 400.3200094 MHz  
WDW EM  
SSB 0  
LB 0.30 Hz  
GB 0  
PC 1.00

ANL-MCL3-NMR-007

C6292-045

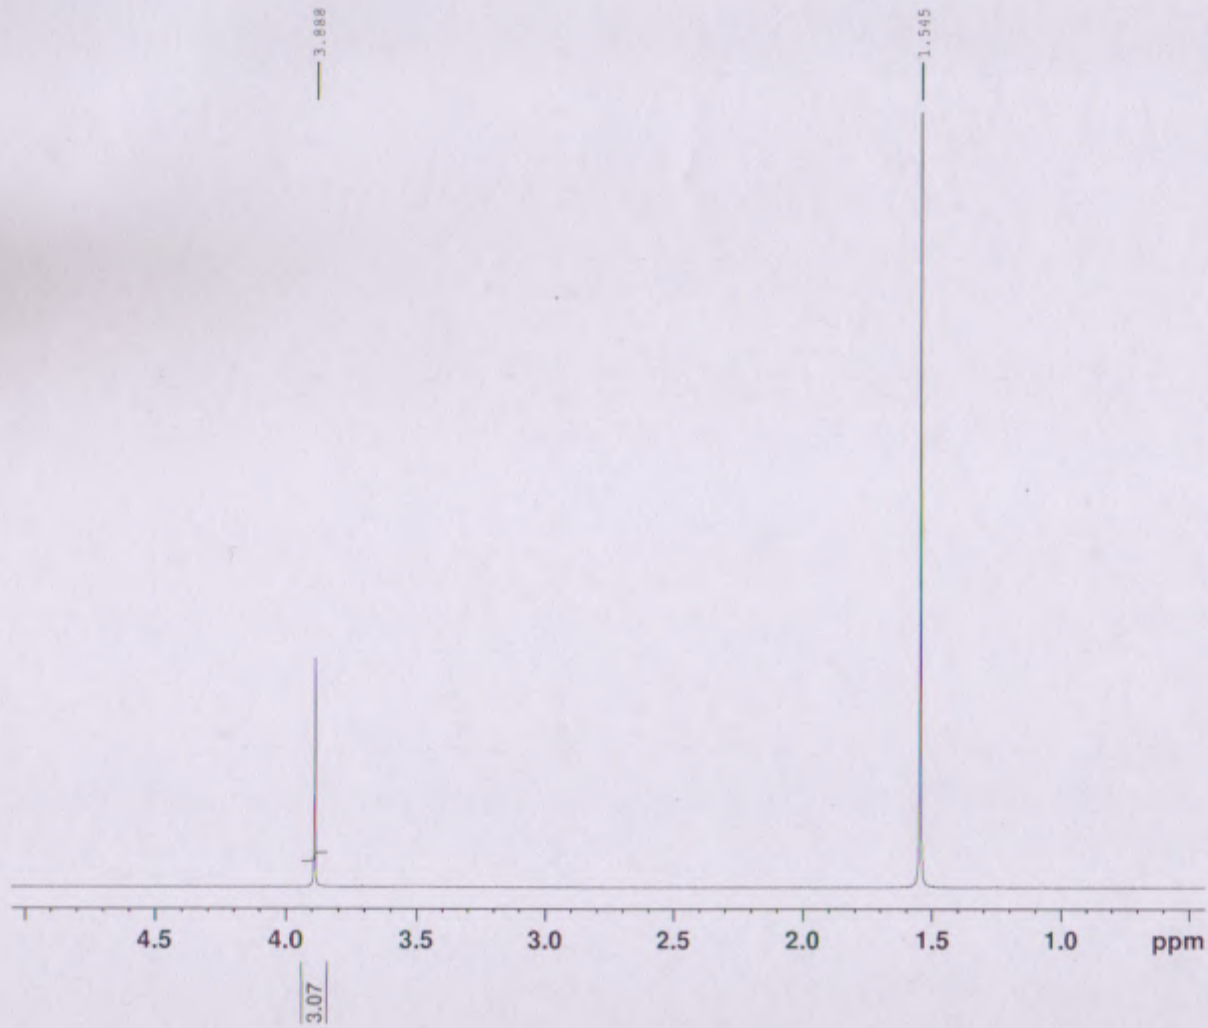

Current Data Parameters  
NAME 022208A6750- C6292-045  
EXPNO 1  
PROCNO 1

F2 - Acquisition Parameters  
Date\_ 20220806  
Time 18.42 h  
INSTRUM Avance  
PROBHD Z163739\_0419 f  
PULPROG zg30  
TD 65536  
SOLVENT CDCl3  
NS 6  
DS 2  
SWH 8196.722 Hz  
FIDRES 0.250144 Hz  
AQ 3.9976959 sec  
RG 101  
DW 61.000 usec  
DE 13.89 usec  
TE 298.5 K  
D1 2.0000000 sec  
TDO 1  
SFO1 400.3224720 MHz  
NUC1 1H  
P0 2.67 usec  
P1 8.00 usec  
PLW1 23.42200089 W

F2 - Processing parameters  
SI 65536  
SF 400.320094 MHz  
WDW EM  
SSB 0  
LB 0.30 Hz  
GB 0  
PC 1.00

ANL-MCL3-NMR-007

13C NMR of 6-Bromo-4-(4-methoxyphenyl)benzo[c][1,2,5]selenadiazole (6)

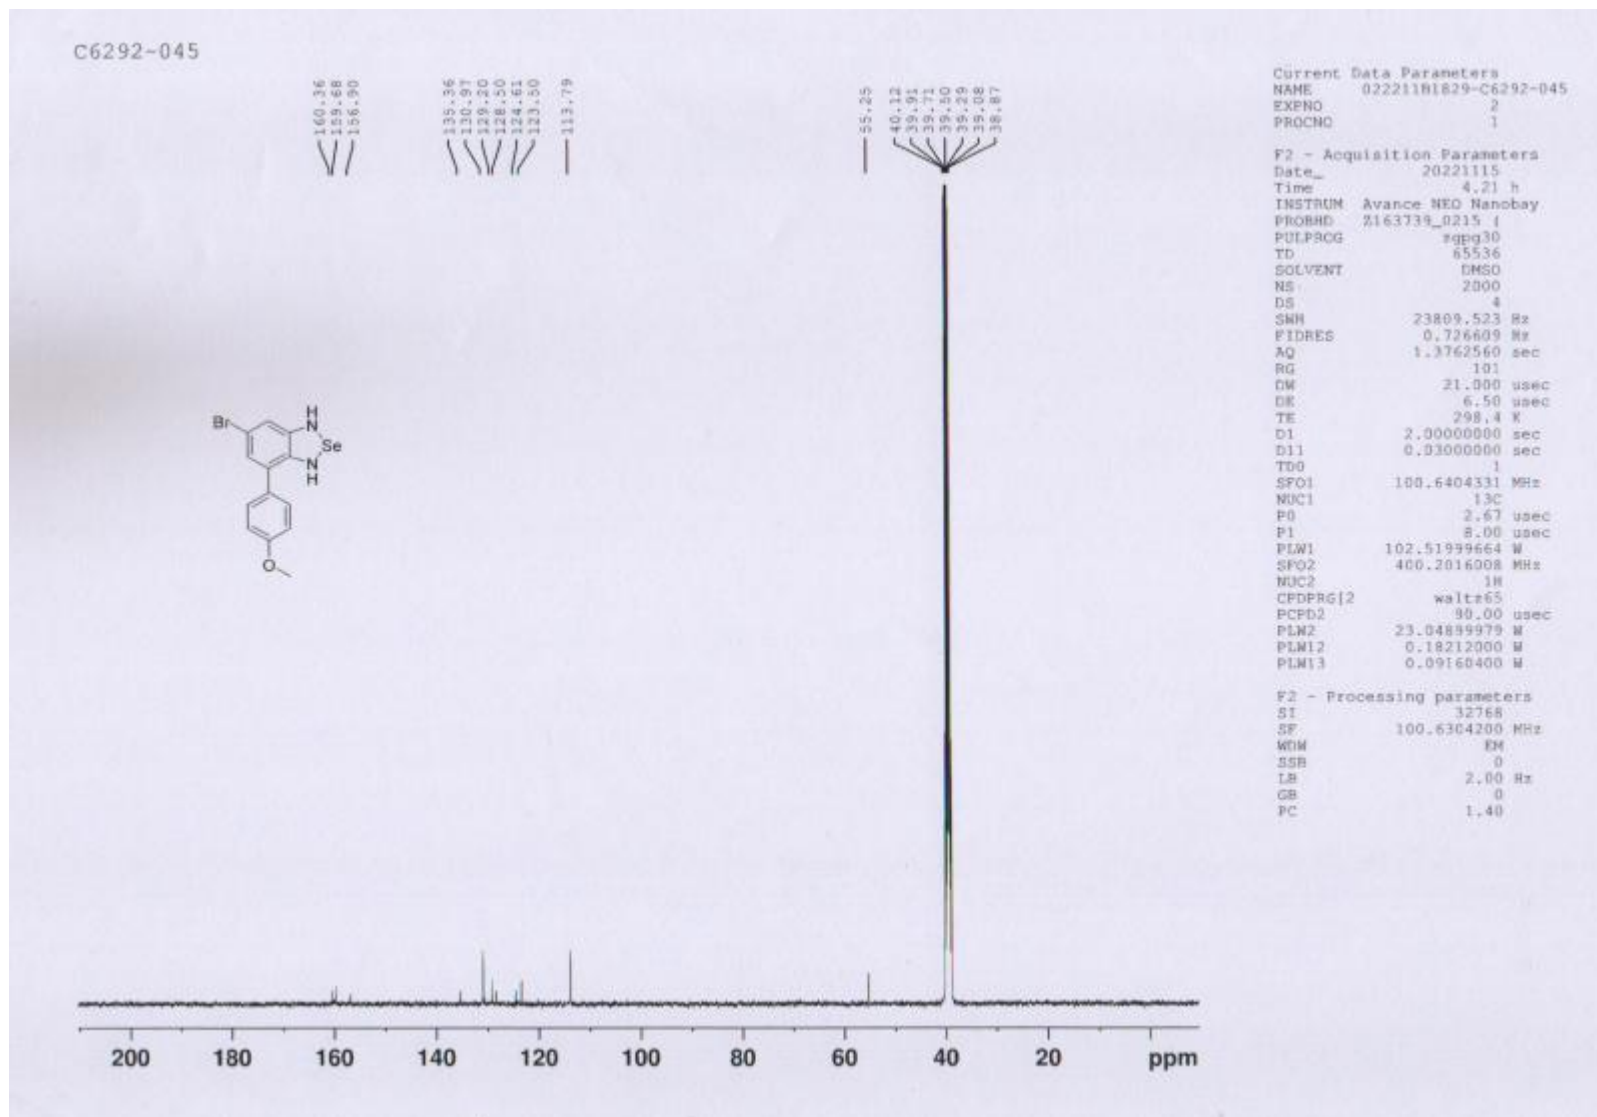

C6292-045

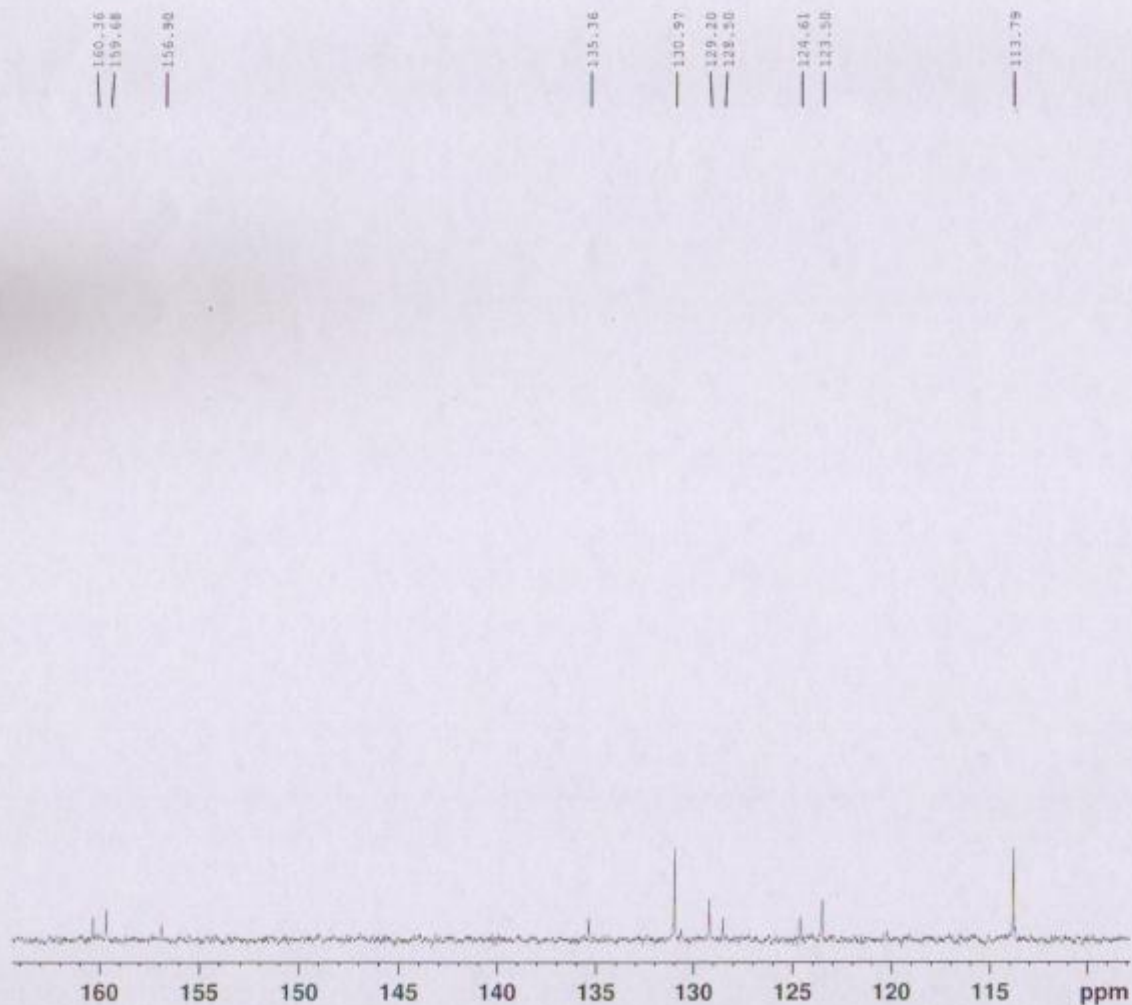

Current Data Parameters  
NAME 022211B1829-C6292-045  
EXPNO 2  
PROCNO 1

F2 - Acquisition Parameters  
Date\_ 20221115  
Time 4.21 h  
INSTRUM Avance NEO Nanobay  
PROBHD X161739\_0215 1  
PULPROG zgpg30  
TD 65536  
SOLVENT DMSO  
NS 2000  
DS 4  
SWH 73809.523 Hz  
FIDRES 0.726609 Hz  
AQ 1.3762560 sec  
RG 101  
DW 21.000 usec  
DE 6.50 usec  
TE 298.4 K  
D1 2.0000000 sec  
D11 0.6300000 sec  
TDO 1  
SFO1 100.6404331 MHz  
NUC1 13C  
P0 2.67 usec  
P1 8.00 usec  
PLM1 102.51999664 W  
SFO2 400.2016008 MHz  
NUC2 1H  
CPDPRG12 waltz65  
PCPD2 90.00 usec  
PLM2 23.04899979 W  
PLM12 0.18212000 W  
PLM13 0.09160400 W

F2 - Processing parameters  
SI 32768  
SF 100.6304200 MHz  
WOM EM  
SSB 0  
LB 2.00 Hz  
GB 0  
PC 1.40

C6292-045

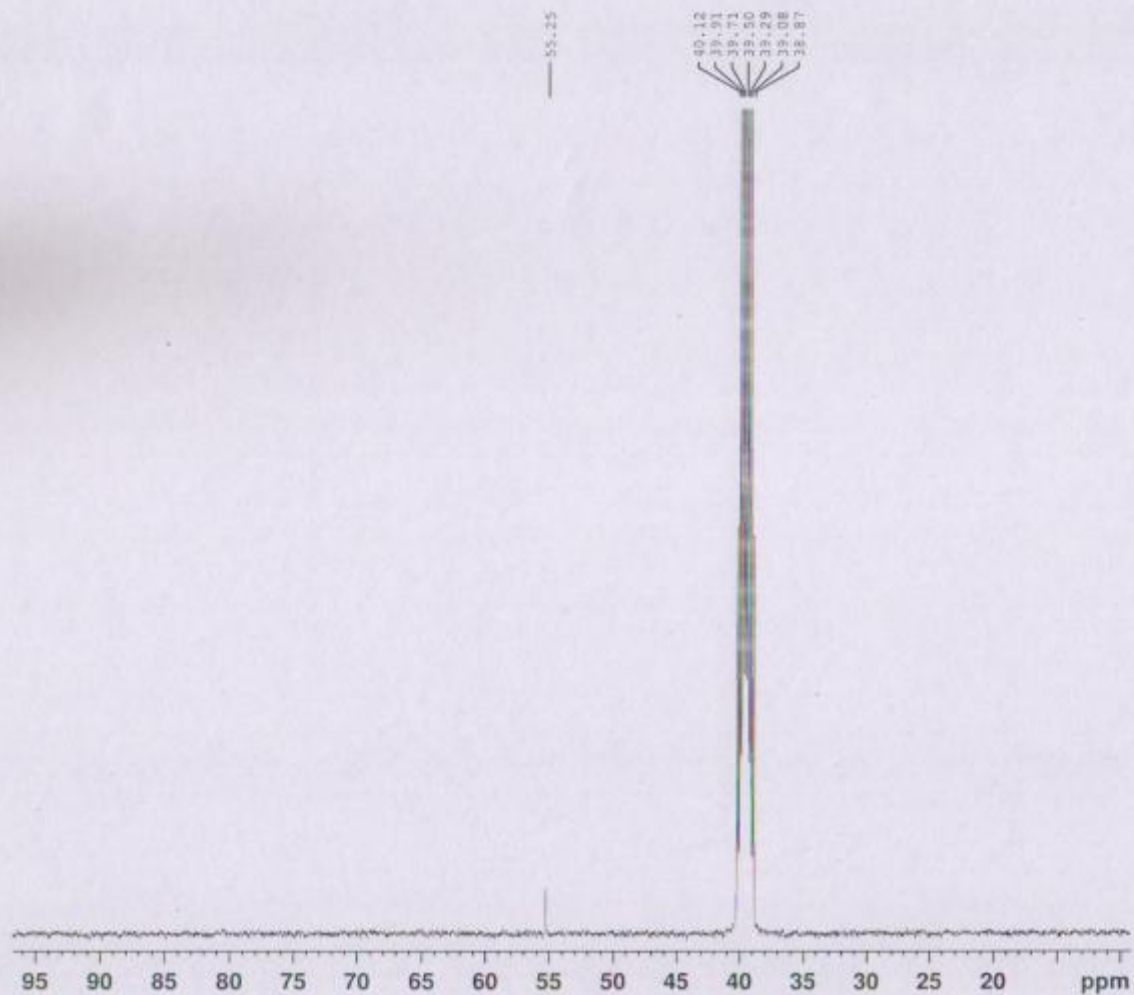

Current Data Parameters  
NAME 02221181829-C6292-045  
EXPNO 2  
PROCNO 1

F2 - Acquisition Parameters  
Date\_ 20221115  
Time 4.21 h  
INSTNM Avance NEO Nanobay  
PROBHD E163739\_0215 1  
PULPROG zgpg30  
TD 65536  
SOLVENT DMSO  
NS 2000  
DS 4  
SWH 23809.523 Hz  
FIDRES 0.726609 Hz  
AQ 1.1762540 sec  
RG 181  
DM 21.000 usec  
DE 6.50 usec  
TE 298.4 K  
D1 2.0000000 sec  
D11 0.0300000 sec  
TD0 1  
SFO1 100.6404331 MHz  
NUC1 13C  
P0 2.67 usec  
P1 8.00 usec  
PLM1 102.51999664 W  
SFO2 400.2016008 MHz  
NUC2 1H  
CPDPRG[2] waltz65  
PCPD2 90.00 usec  
PLW2 23.04899979 W  
PLW12 0.18212000 W  
PLW13 0.09160400 W

F2 - Processing parameters  
SI 32768  
SF 100.6304200 MHz  
WDW EM  
SSB 0  
LB 2.00 Hz  
GB 0  
PC 1.40

# LCMS of 6-Bromo-4-(4-methoxyphenyl)benzo[c][1,2,5]selenadiazole (6)

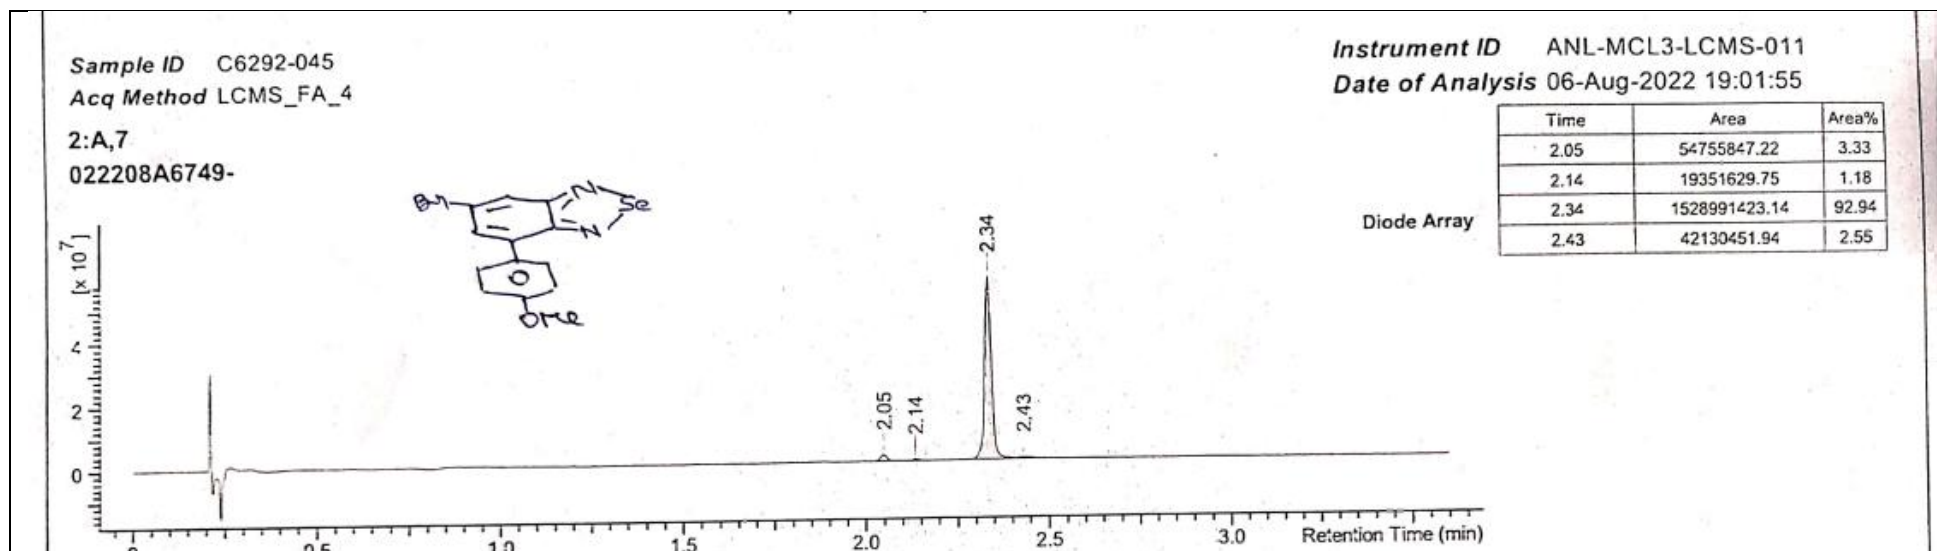

Sample ID C6292-045

Discovery Chemistry - Analytical Services

Instrument ID ANL-MCL3-LCMS-011

Acq Method LCMS\_FA\_4

Date of Analysis 06-Aug-2022 19:01:55

2:A,7

022208A6749-

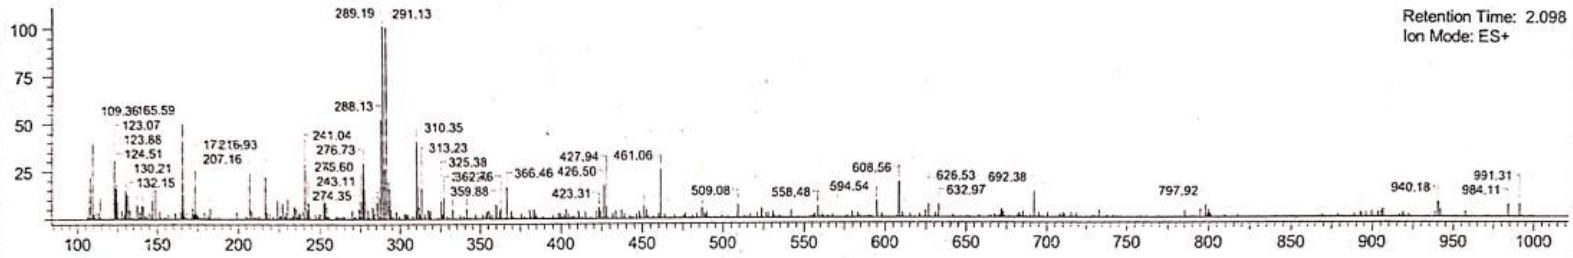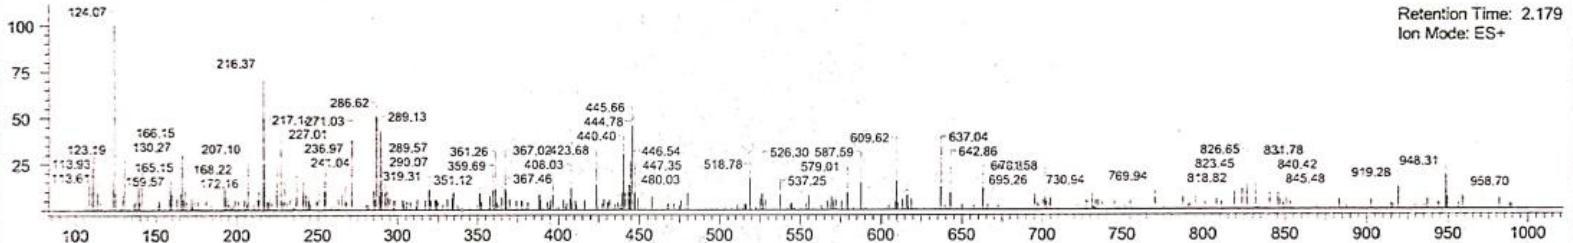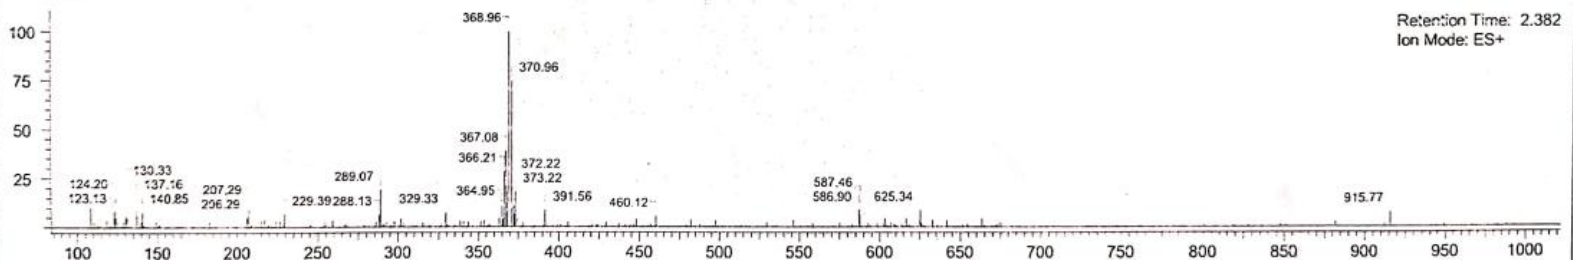

# <sup>1</sup>H NMR of 5-Bromo-4'-methoxy-N<sup>3</sup>-methyl-[1,1'-biphenyl]-2,3-diamine (7)

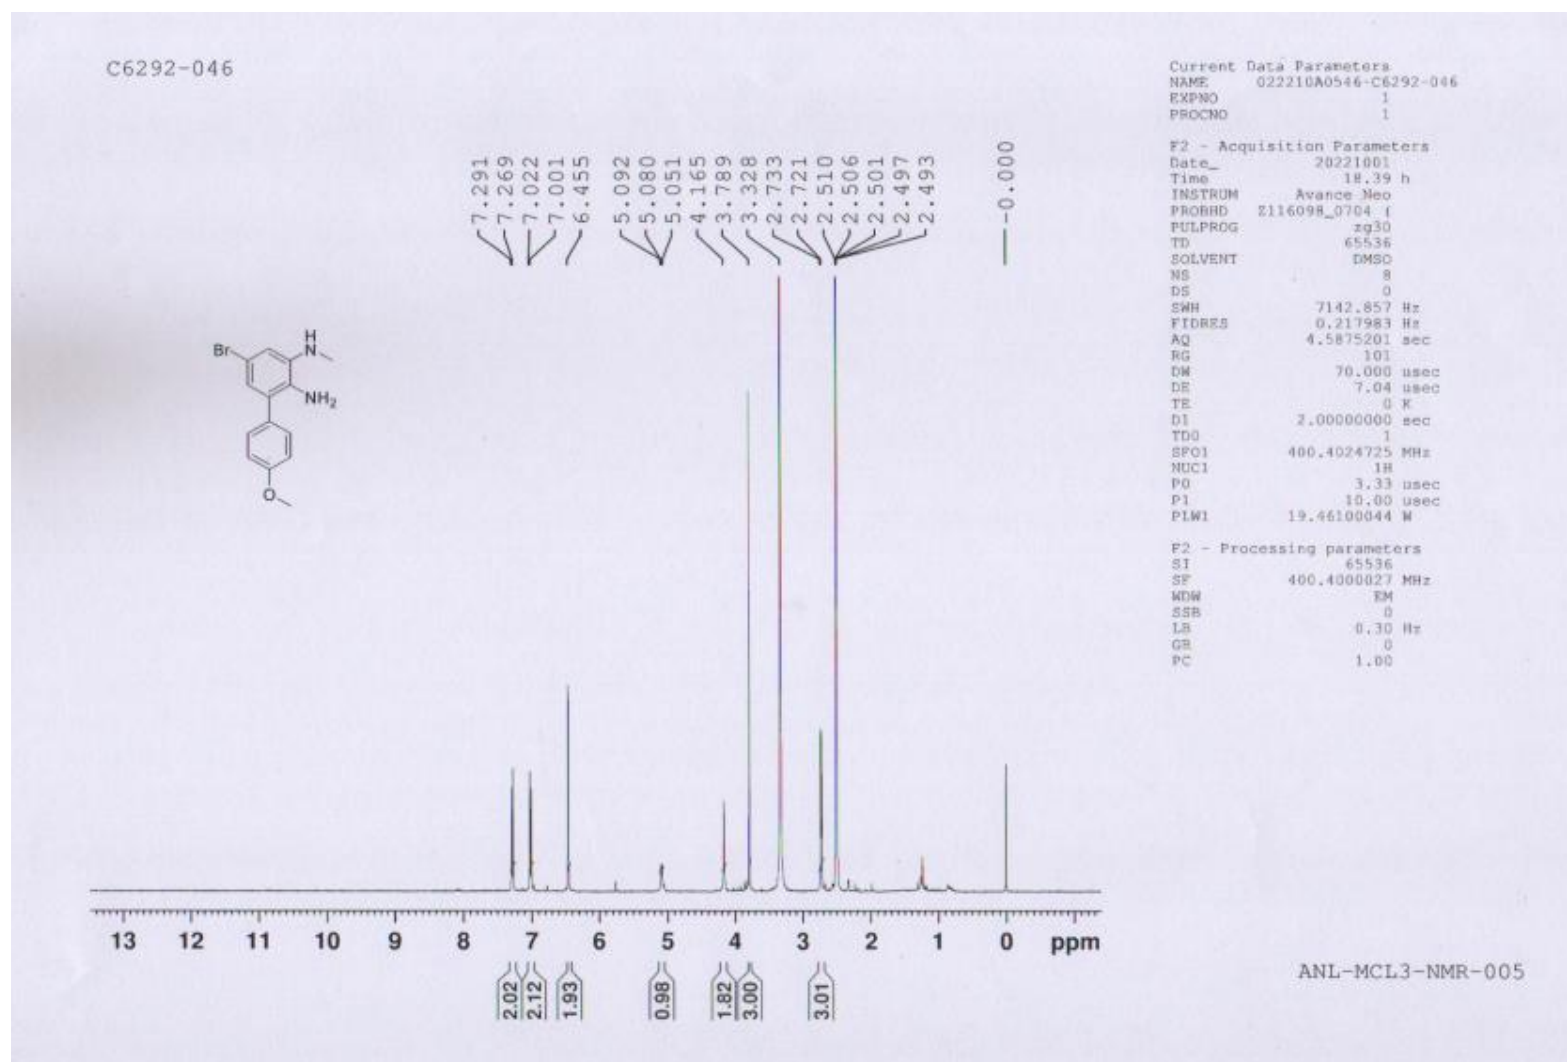



C6292-046

Current Data Parameters  
NAME 022210A0546-C6292-046  
EXPNO 1  
PROCNO 1

F2 - Acquisition Parameters  
Date\_ 20221001  
Time 18.39 h  
INSTRUM Avance Neo  
PROBHD Z116098\_0704 1  
PULPROG zg30  
TD 65536  
SOLVENT DMSO  
NS 8  
DS 0  
SWH 7142.857 Hz  
FIDRES 0.217983 Hz  
AQ 4.5875201 sec  
RG 101  
DW 70.000 usec  
DE 7.04 usec  
TE 0 K  
D1 2.00000000 sec  
TDO 1  
SFO1 400.4024725 MHz  
NUC1 1H  
PO 3.33 usec  
P1 10.00 usec  
PLW1 19.46100044 W

F2 - Processing parameters  
SI 65536  
SF 400.4000027 MHz  
WDW EM  
SSB 0  
LB 0.30 Hz  
GB 0  
PC 1.00

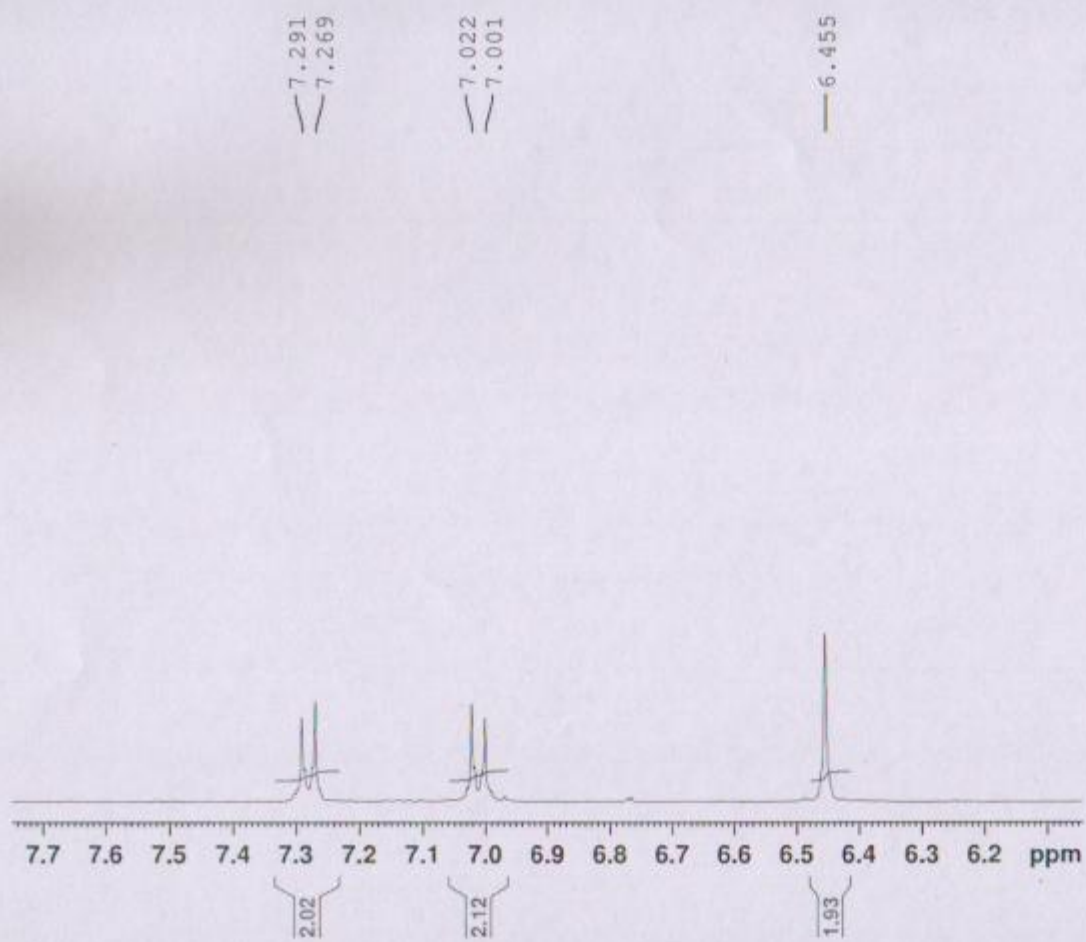

ANL-MCL3-NMR-005

C6292-046

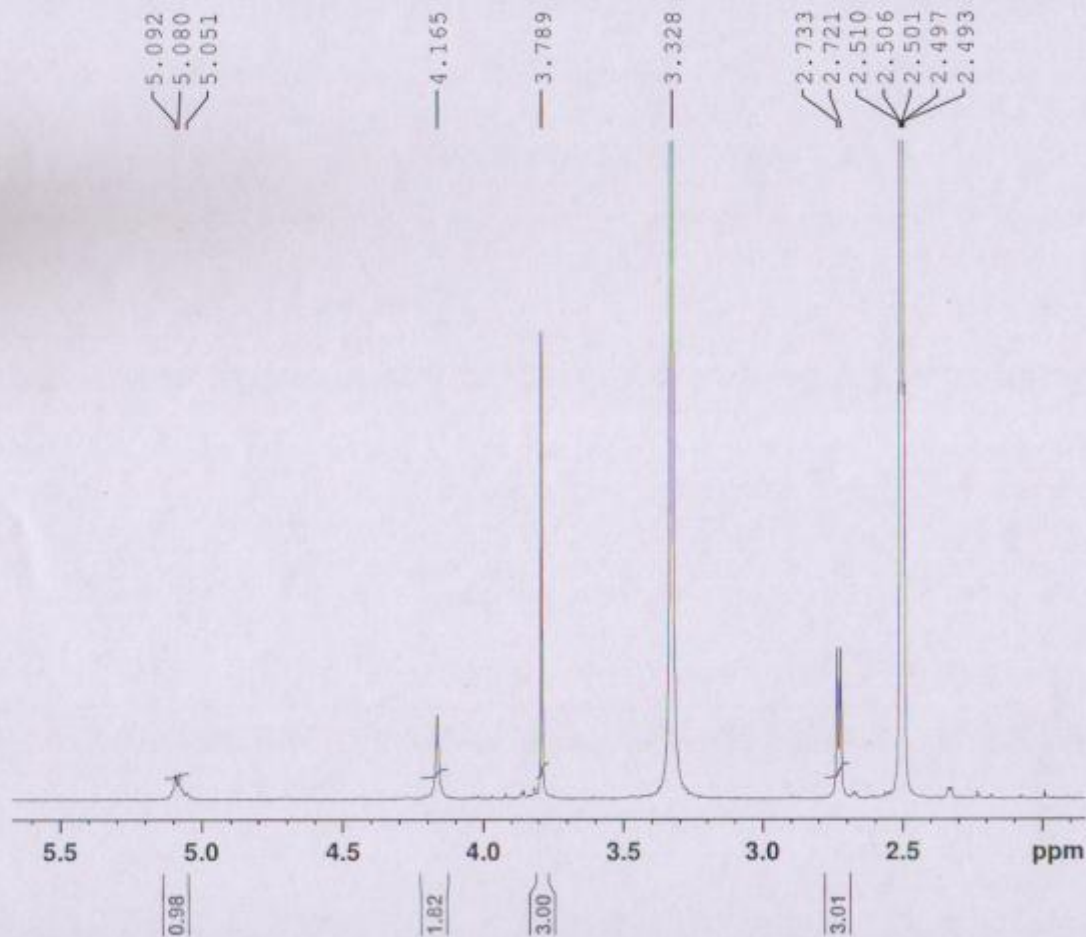

Current Data Parameters  
NAME 022210A0546-C6292-046  
EXPNO 1  
PROCNO 1

F2 - Acquisition Parameters  
Date\_ 20221001  
Time 18.39 h  
INSTRUM Avance Neo  
PROBHD Z116098\_0704\_4  
PULPROG zg30  
TD 65536  
SOLVENT DMSO  
NS 8  
DS 0  
SWH 7142.857 Hz  
FIDRES 0.217983 Hz  
AQ 4.5875201 sec  
RG 101  
DW 70.000 usec  
DE 7.04 usec  
TE 0 K  
D1 2.0000000 sec  
TD0 1  
SFO1 400.4024725 MHz  
NUC1 1H  
P0 3.33 usec  
P1 10.00 usec  
PLW1 19.46100044 W

F2 - Processing parameters  
SI 65536  
SF 400.4000027 MHz  
WDW EM  
SSB 0  
LB 0.30 Hz  
GB 0  
PC 1.00

ANL-MCL3-NMR-005

# NOE of 5-Bromo-4'-methoxy-*N*<sup>3</sup>-methyl-[1,1'-biphenyl]-2,3-diamine (7)

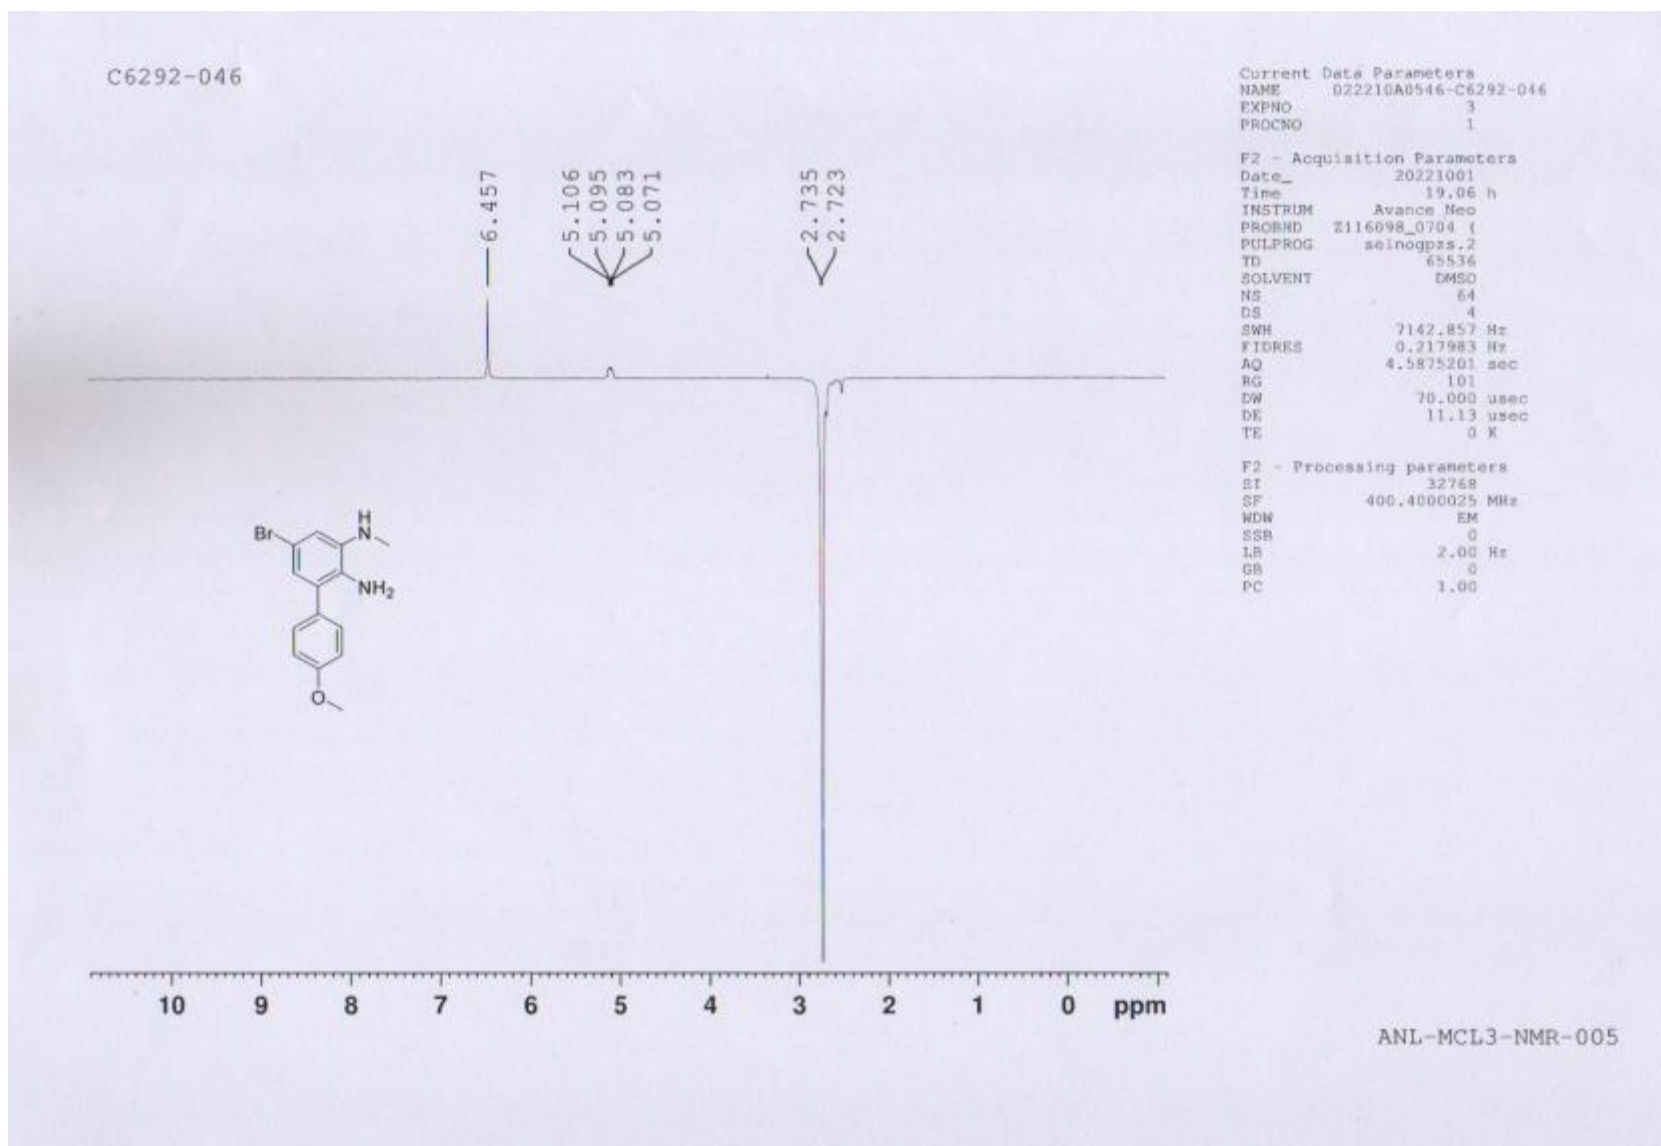

# <sup>13</sup>C NMR of 5-Bromo-4'-methoxy-N<sup>3</sup>-methyl-[1,1'-biphenyl]-2,3-diamine (7)

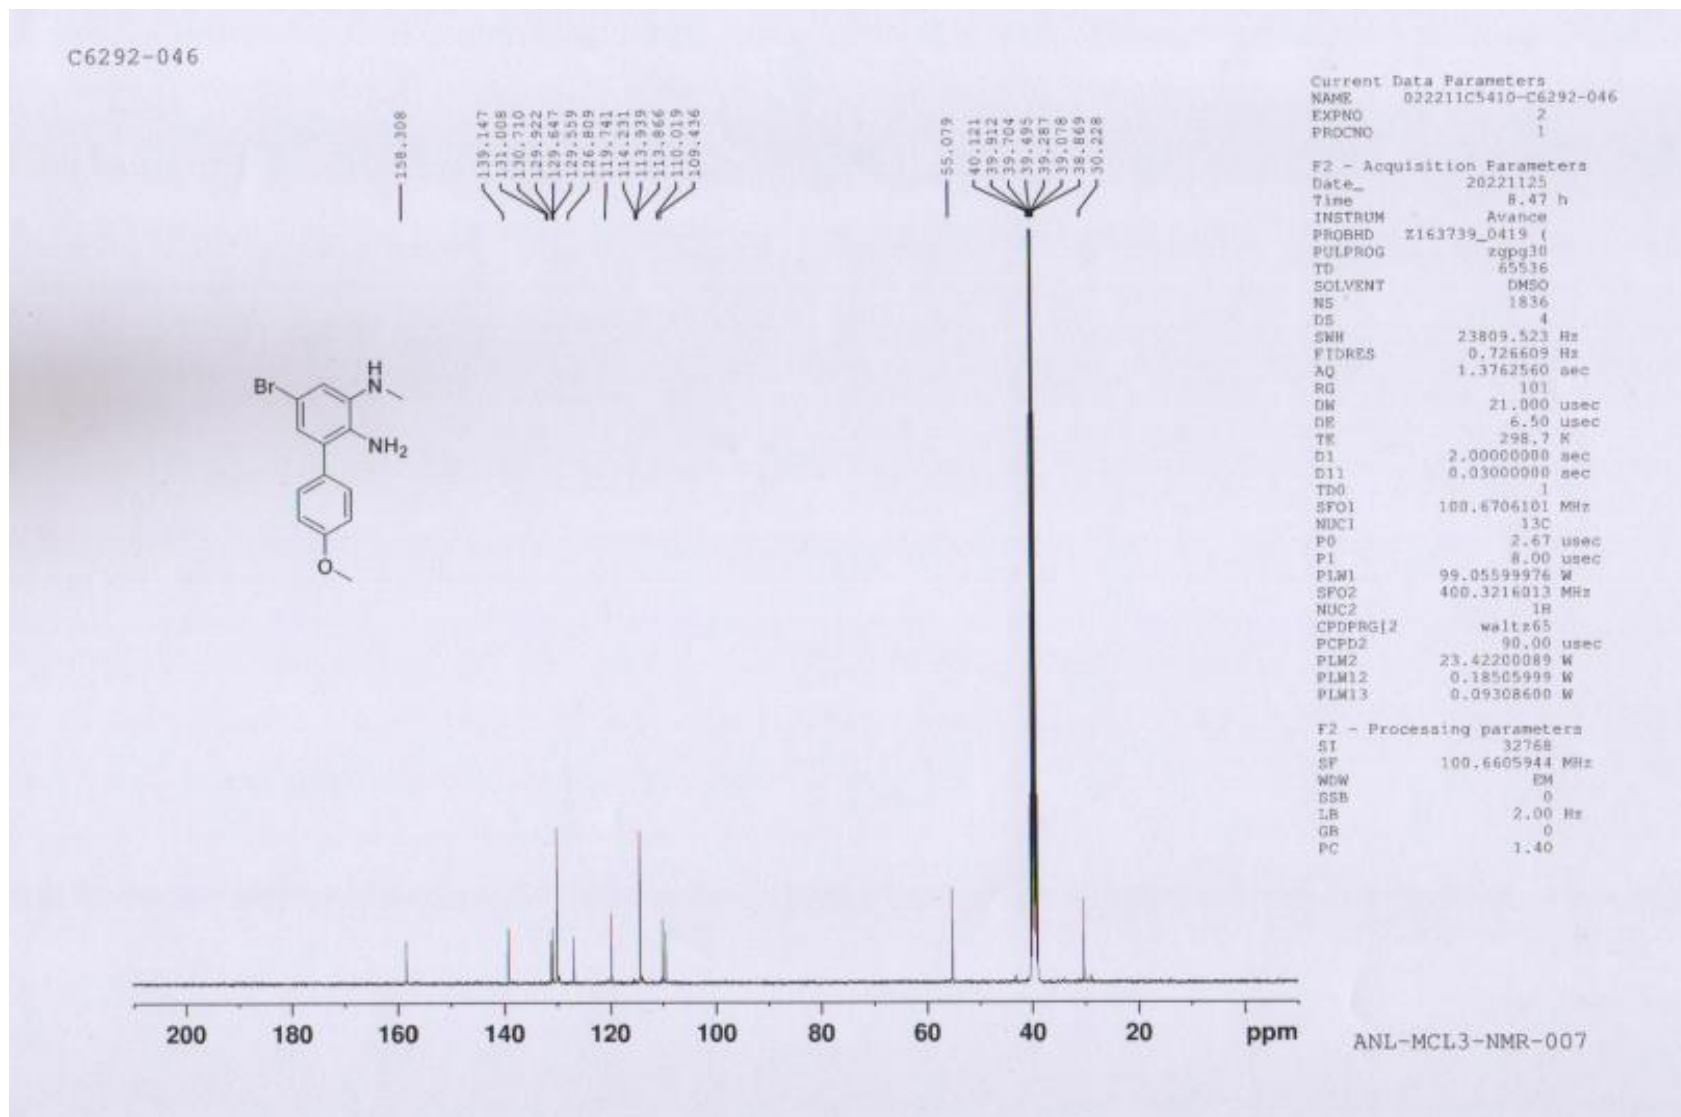

C6292-046

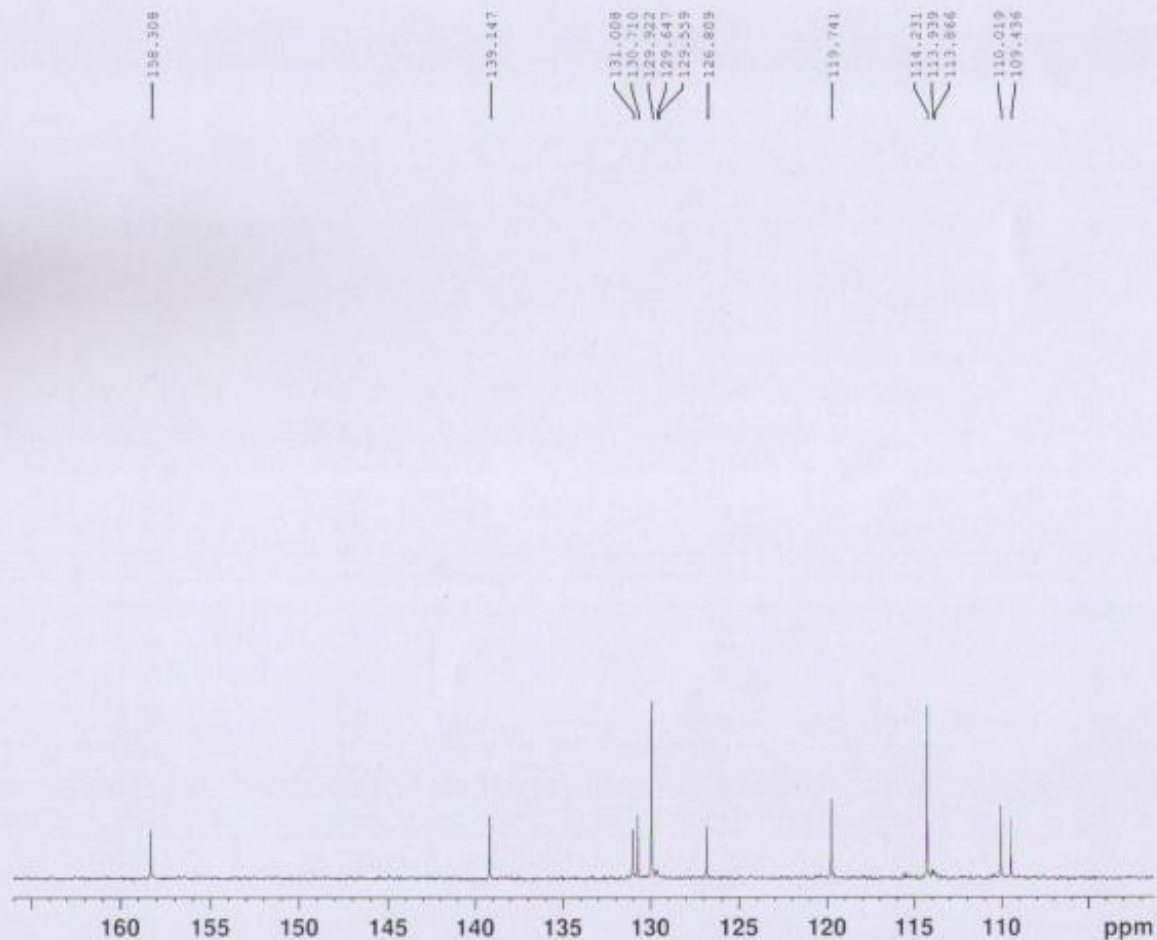

Current Data Parameters  
NAME 022211C5410-C6292-046  
EXPNO 2  
PROCNO 1

F2 - Acquisition Parameters  
Date\_ 20221125  
Time 8.47 h  
INSTRUM Avance  
PROBHD z163739\_0419 1  
PULPROG zgpg30  
TD 65536  
SOLVENT DMSO  
NS 1836  
DS 4  
SWH 23809.523 Hz  
FIDRES 0.726609 Hz  
AQ 1.3762560 sec  
RG 101  
DW 21.000 usec  
DE 6.50 usec  
TE 298.7 K  
D1 2.0000000 sec  
D11 0.0300000 sec  
TD0 1  
SFO1 100.6706101 MHz  
NUC1 13C  
P0 2.67 usec  
P1 8.00 usec  
PLW1 99.05599976 W  
SFO2 400.3216013 MHz  
NUC2 1H  
CPOPRG(2) waltz65  
PCPD2 90.00 usec  
PLW2 23.42200089 W  
PLW12 0.18505999 W  
PLW13 0.09308600 W

F2 - Processing parameters  
SI 32768  
SF 100.6605944 MHz  
WDW EM  
SSB 0  
LB 2.00 Hz  
GB 0  
PC 1.40

ANL-MCL3-NMR-007

C6292-046

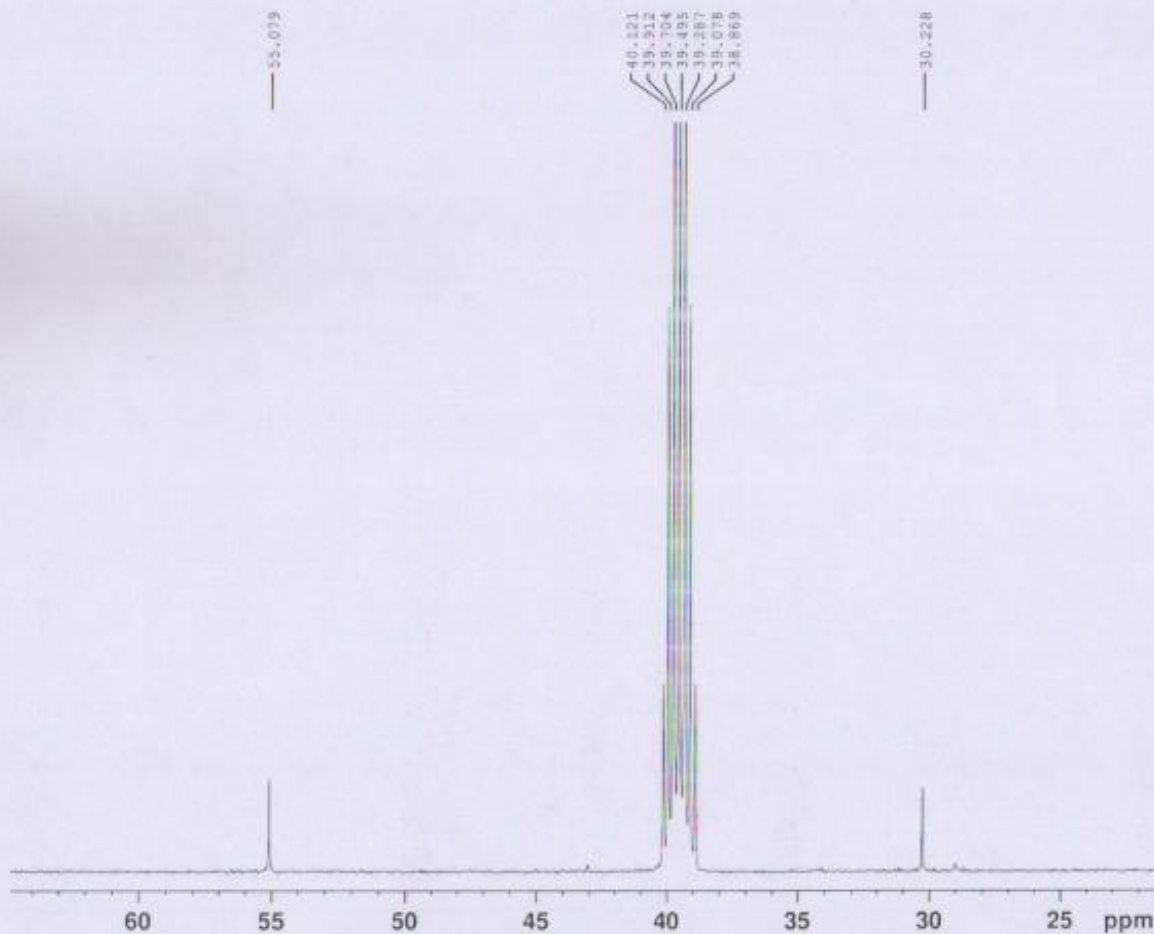

Current Data Parameters  
NAME 022211C5410-C6292-046  
EXPNO 2  
PROCNO 1

F2 - Acquisition Parameters  
Date\_ 20221125  
Time 8.47 h  
INSTRUM Avance  
PROBHD z163739\_D419 4  
PULPROG zgpg30  
TD 65536  
SOLVENT DMSO  
NS 1836  
DS 4  
SWH 23809.523 Hz  
FIDRES 0.726609 Hz  
AQ 1.3762560 sec  
RG 101  
DW 21.000 usec  
DE 6.50 usec  
TE 298.7 K  
D1 2.0000000 sec  
D11 0.0300000 sec  
TD0 1  
SFO1 100.6706101 MHz  
NUC1 13C  
P0 2.67 usec  
P1 8.00 usec  
PLW1 99.05599976 W  
SFO2 400.3216013 MHz  
NUC2 1H  
CPDPRG12 waltz65  
PCPD2 90.00 usec  
PLW2 23.42200089 W  
PLW12 0.18505999 W  
PLW13 0.09308600 W

F2 - Processing parameters  
SI 32768  
SF 100.6605944 MHz  
WDW EM  
SSB 0  
LB 2.00 Hz  
GB 0  
PC 1.40

ANL-MCL3-NMR-007

# LCMS of 5-Bromo-4'-methoxy-*N*<sup>3</sup>-methyl-[1,1'-biphenyl]-2,3-diamine (7)

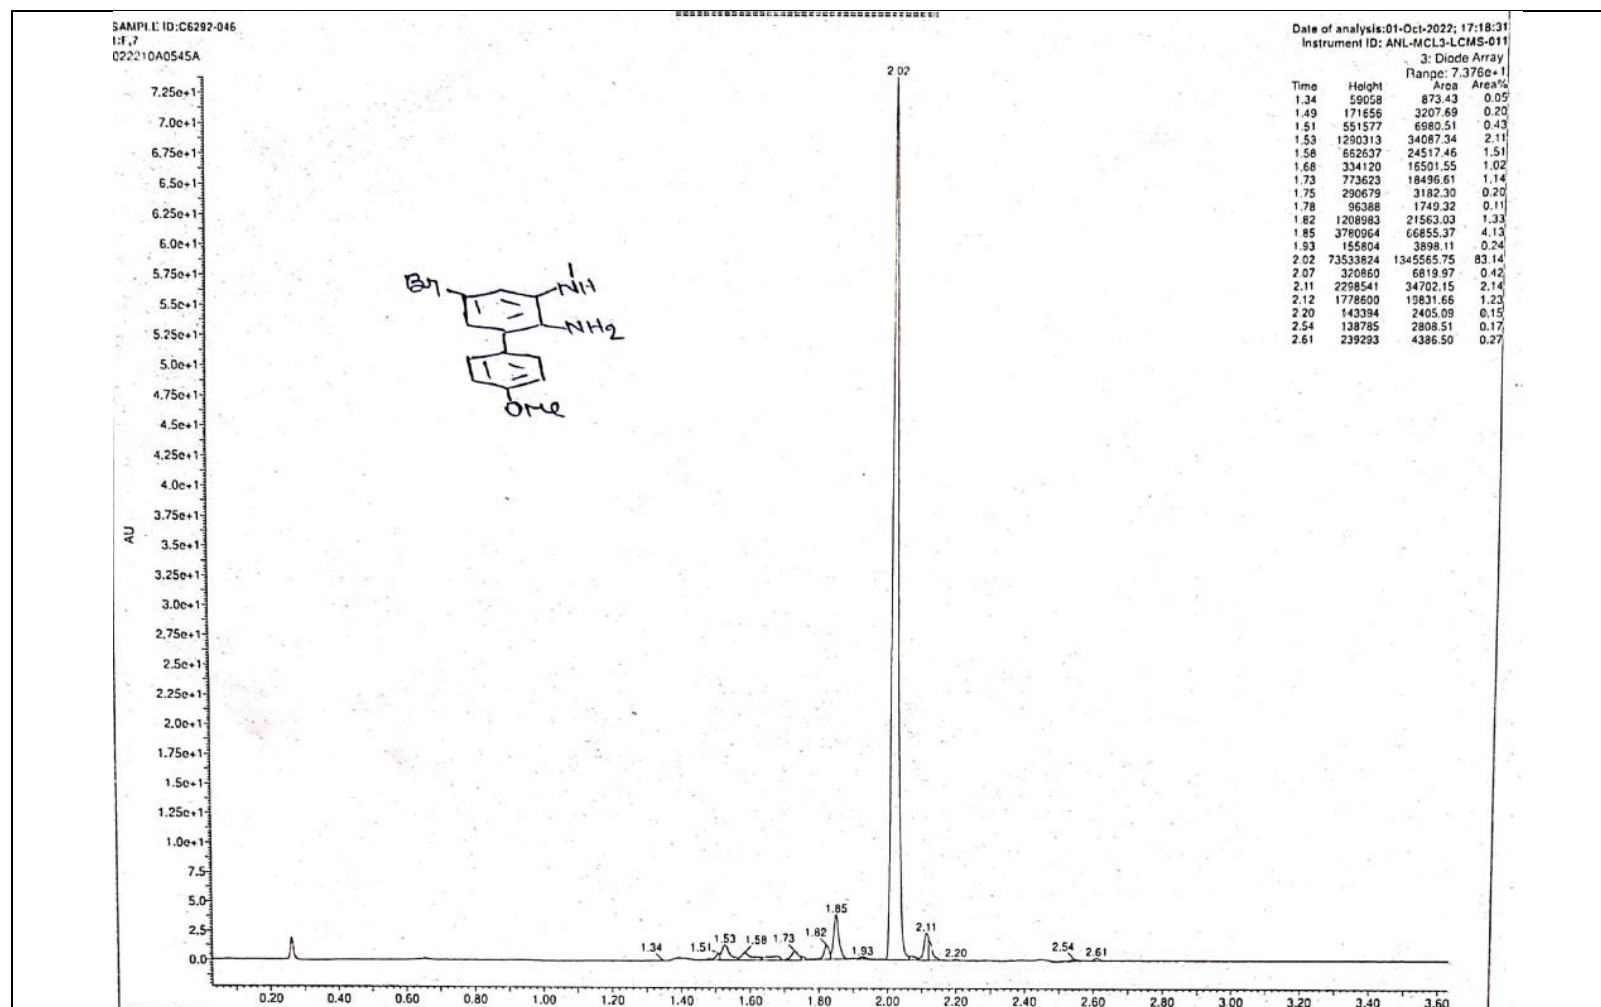

SAMPLE ID: C6292-046  
1:F,7  
022210A0545A 95 (2.017)

Date of analysis: 01-Oct-2022; 17:18:31  
Instrument ID: ANL-MCL3-LCMS-011  
1: MS2 ES-  
7.44c7

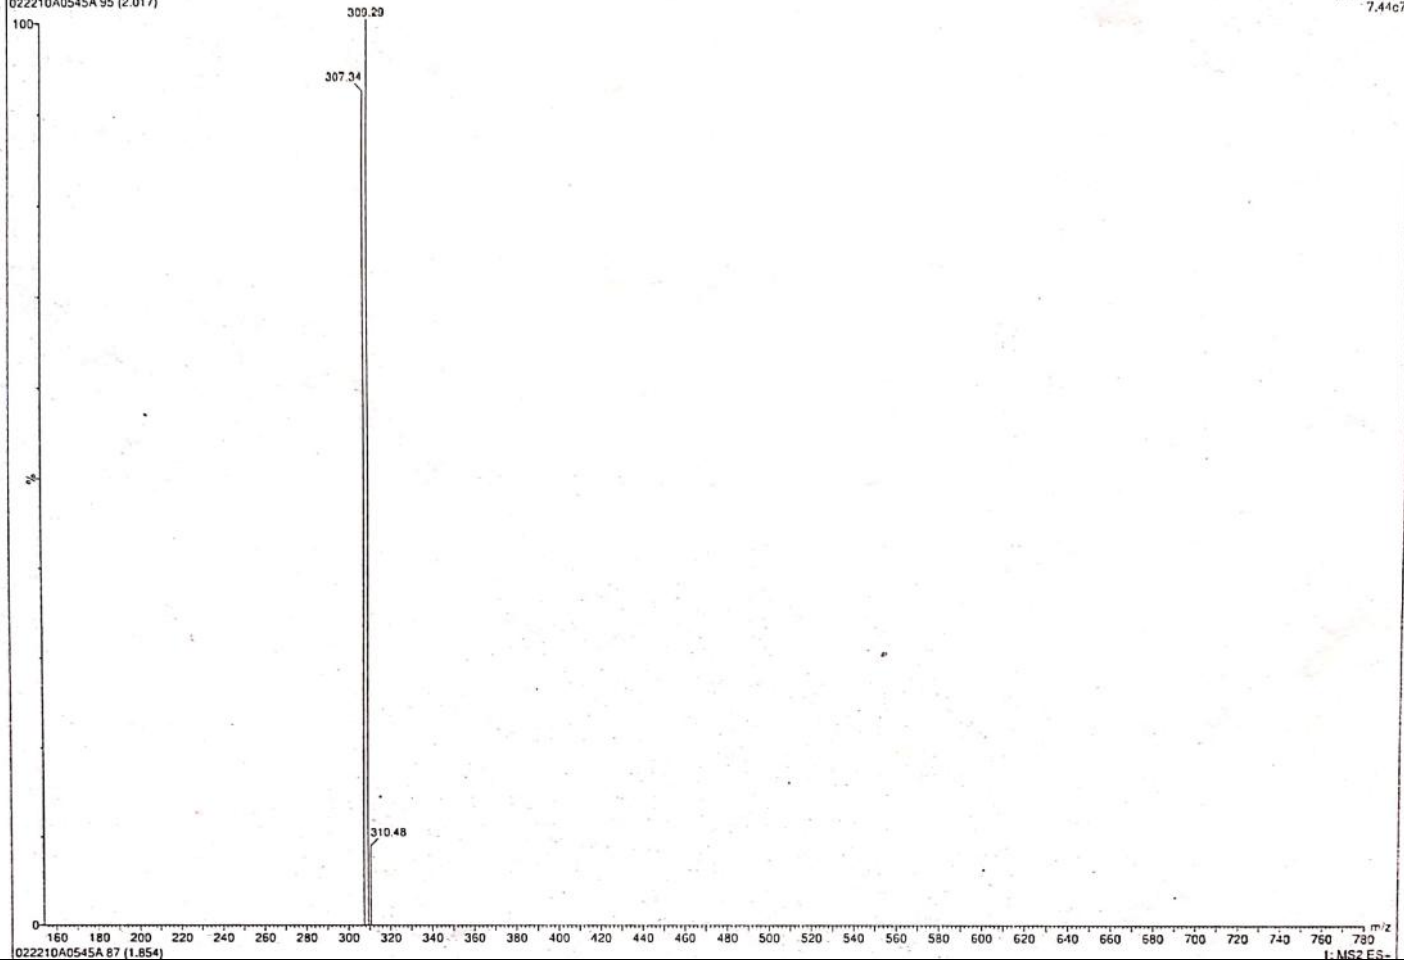



# <sup>1</sup>H NMR of 6-Bromo-4-(4-methoxyphenyl)-1-methyl-1,3-dihydro-2H-benzo[d]imidazol-2-one (8)

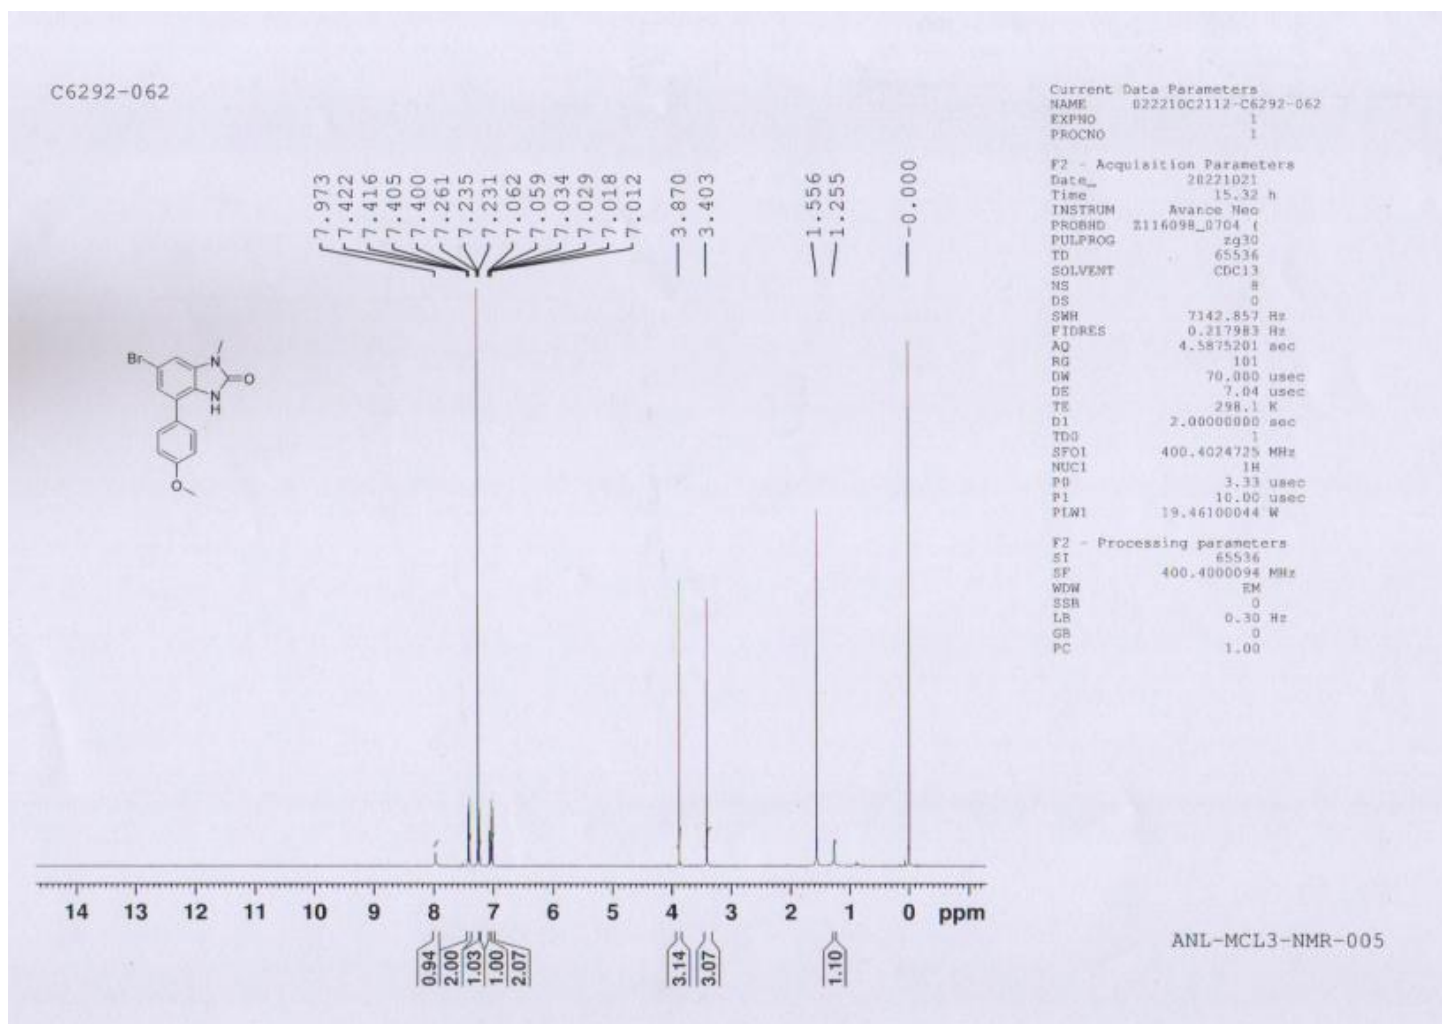

C6292-062

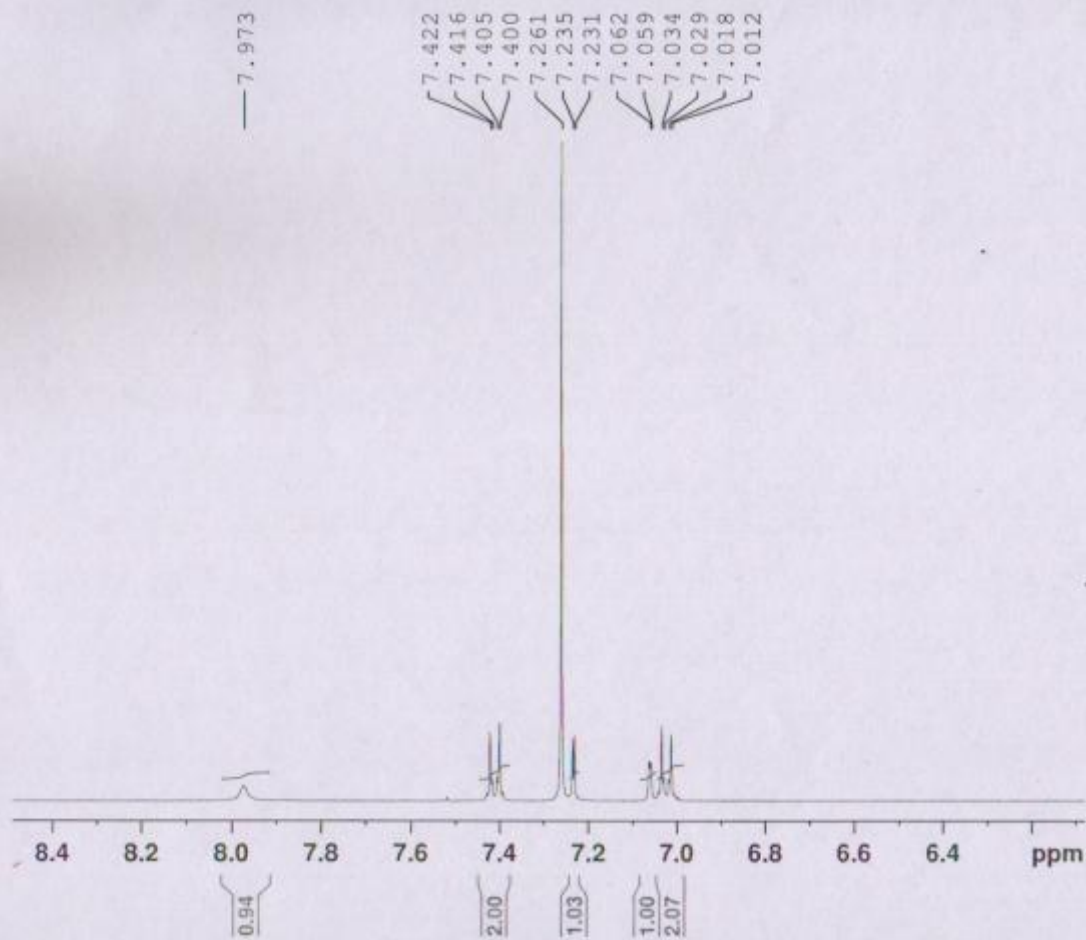

Current Data Parameters  
NAME 022210C2112-C6292-062  
EXPNO 1  
PROCNO 1

F2 - Acquisition Parameters  
Date\_ 20221021  
Time 15.32 h  
INSTRUM Avance Neo  
PROBHD 2116098\_0704 (1  
PULPROG zg30  
TD 65536  
SOLVENT CDCl3  
NS 8  
DS 0  
SWH 7142.857 Hz  
FIDRES 0.217983 Hz  
AQ 4.5875201 sec  
RG 101  
DW 70.000 usec  
DE 7.04 usec  
TE 298.1 K  
D1 2.00000000 sec  
TDO 1  
SFO1 400.4024725 MHz  
NUC1 1H  
PO 3.33 usec  
PI 10.00 usec  
PLW1 19.46100044 W

F2 - Processing parameters  
SI 65536  
SF 400.4000094 MHz  
WDW EM  
SSB 0  
LB 0.30 Hz  
GB 0  
PC 1.00

ANL-MCL3-NMR-005

C6292-062

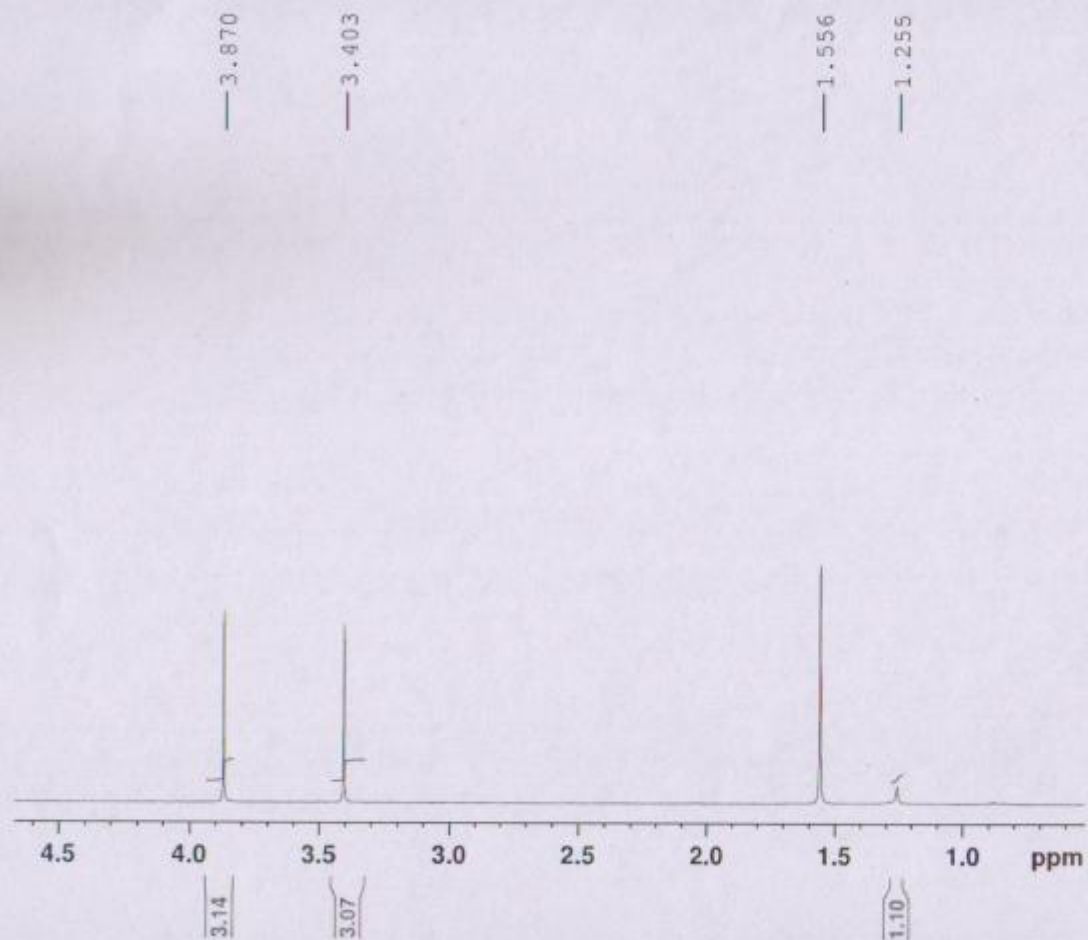

Current Data Parameters  
NAME 022210C2112-C6292-062  
EXPNO 1  
PROCNO 1

F2 - Acquisition Parameters  
Date\_ 20221021  
Time 15.32 h  
INSTRUM Avance Neo  
PROBHD Z116098\_0704 (1  
PULPROG zg30  
TD 65536  
SOLVENT CDCl3  
NS 8  
DS 0  
SWH 7142.857 Hz  
FIDRES 0.217983 Hz  
AQ 4.5875201 sec  
RG 101  
DW 70.000 usec  
DE 7.04 usec  
TE 298.1 K  
D1 2.0000000 sec  
TD0 1  
SFO1 400.4024725 MHz  
NUC1 1H  
P0 3.33 usec  
P1 10.00 usec  
PLW1 19.46100044 W

F2 - Processing parameters  
SI 65536  
SF 400.4000094 MHz  
WDW EM  
SSB 0  
LB 0.30 Hz  
GB 0  
PC 1.00

ANL-MCL3-NMR-005

# **<sup>13</sup>C NMR of 6-Bromo-4-(4-methoxyphenyl)-1-methyl-1,3-dihydro-2H-benzo[d]imidazol-2-one (8)**

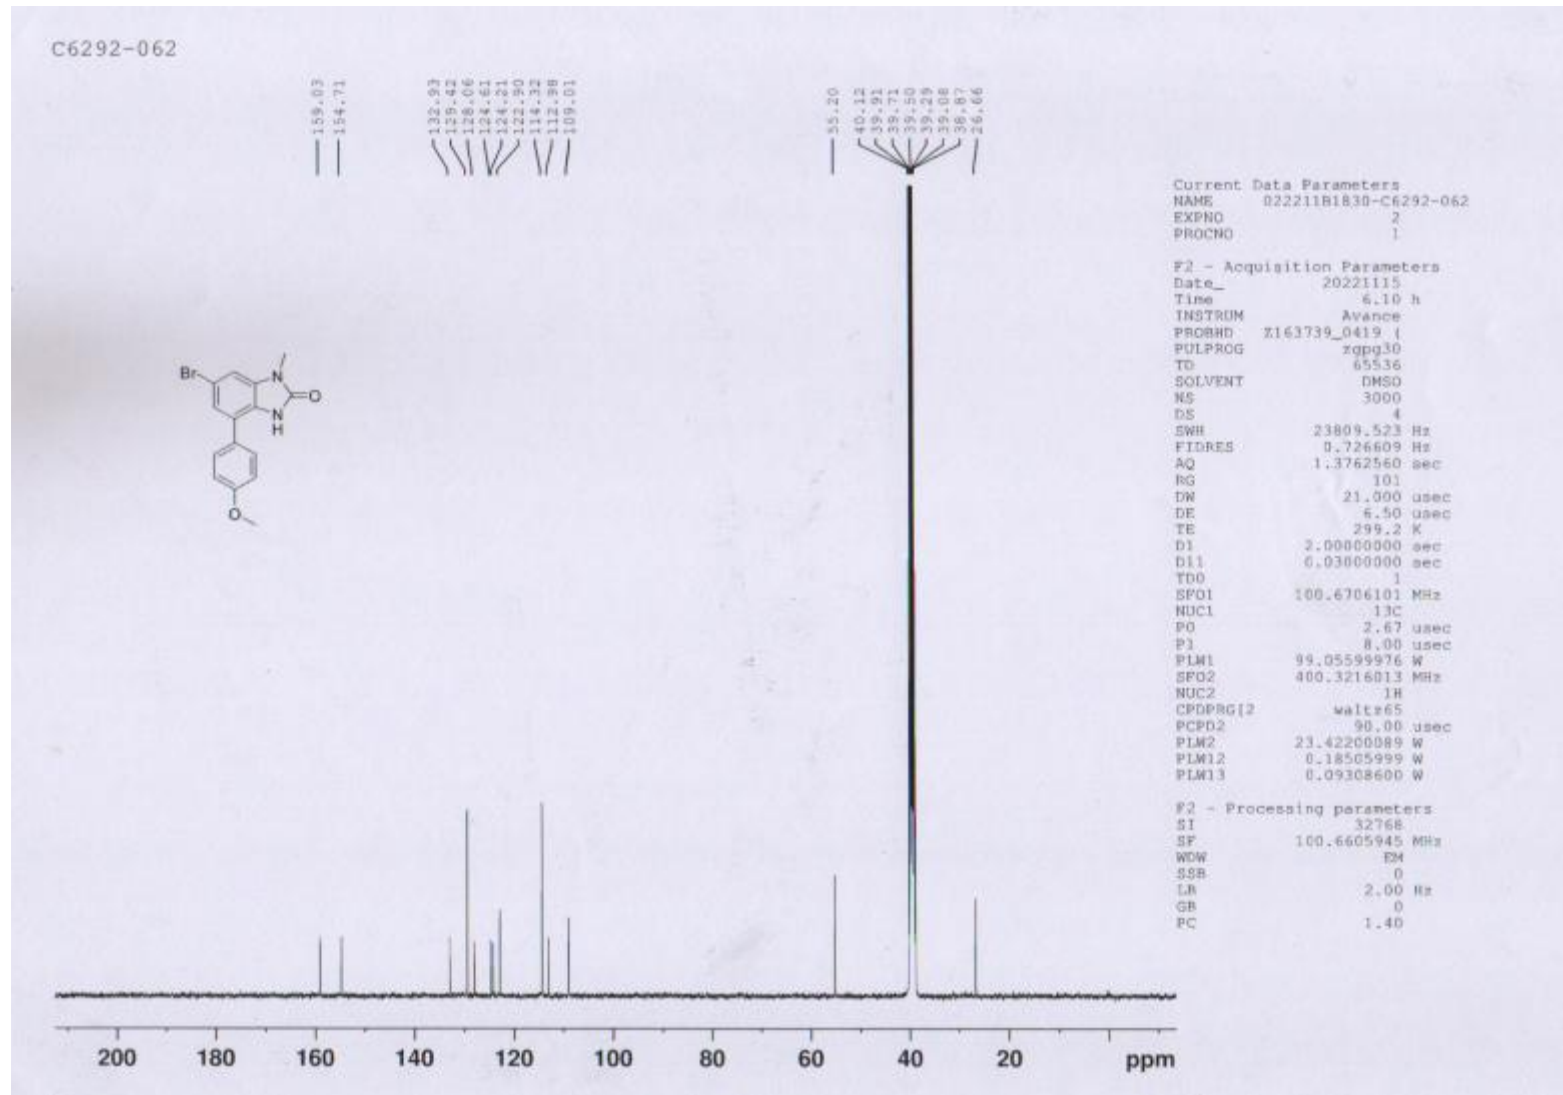

C6292-062

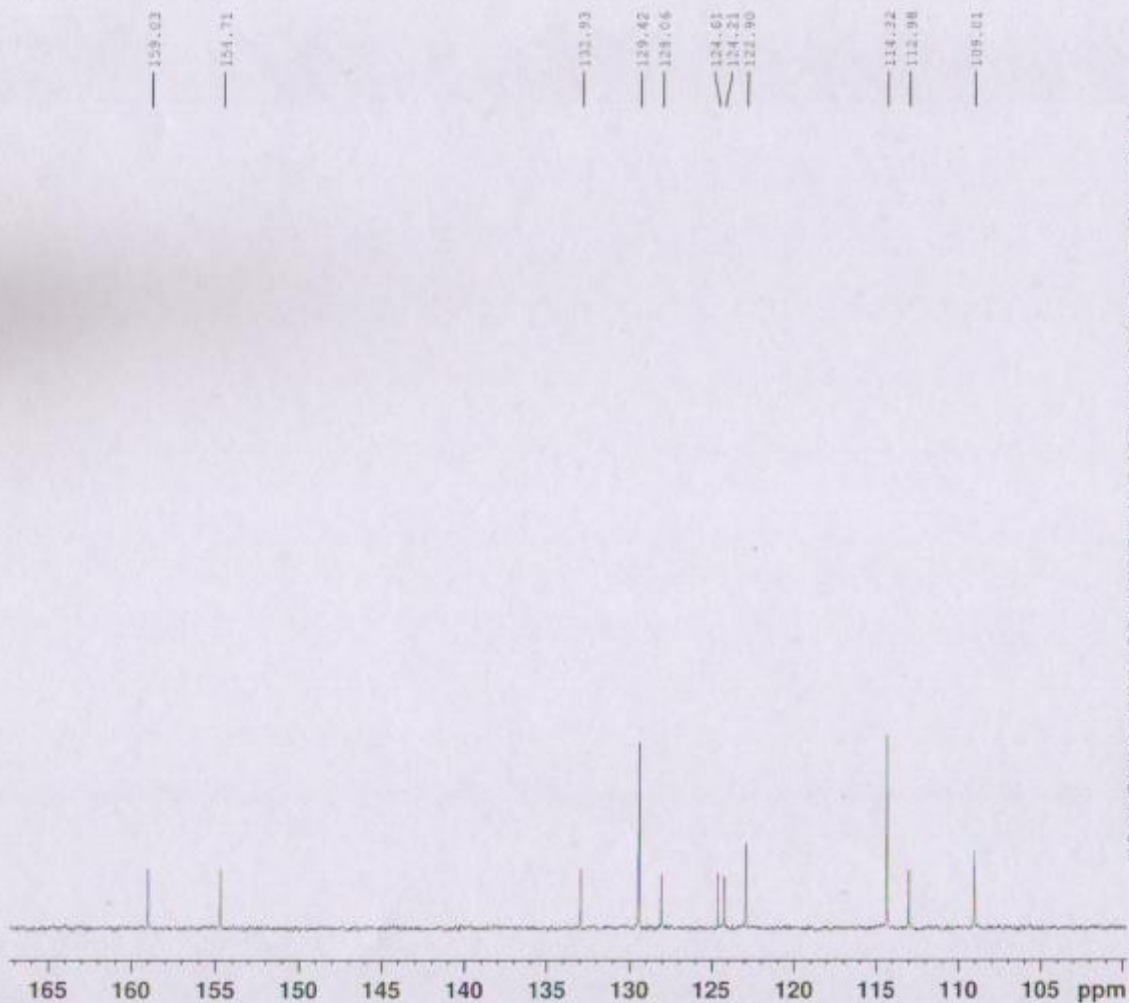

Current Data Parameters  
NAME 022213B1830-C6292-062  
EXPNO 2  
PROCNO 1

F2 - Acquisition Parameters  
Date\_ 20221115  
Time 6.10 h  
INSTRUM Avance  
PROBHD Z162739\_0419 4  
PULPROG zgpg30  
TD 65536  
SOLVENT DMSO  
NS 3000  
DS 4  
SWH 23809.523 Hz  
FIDRES 0.724609 Hz  
AQ 1.3762560 sec  
RG 101  
DW 21.000 usec  
DE 6.50 usec  
TE 299.2 K  
D1 2.0000000 sec  
D11 0.0300000 sec  
TD0 1  
SFO1 100.6706101 MHz  
NUC1 13C  
PC 2.67 usec  
P1 8.00 usec  
PLW1 99.05599976 W  
SFO2 400.3216013 MHz  
NUC2 1H  
CPDPRG12 waltz165  
PCPD2 90.00 usec  
PLW2 23.42200089 W  
PLW12 0.18505999 W  
PLW13 0.09308600 W

F2 - Processing parameters  
SI 32768  
SF 100.6605945 MHz  
WDW EM  
SSB 0  
LB 2.00 Hz  
GB 0  
PC 1.40

C6292-062

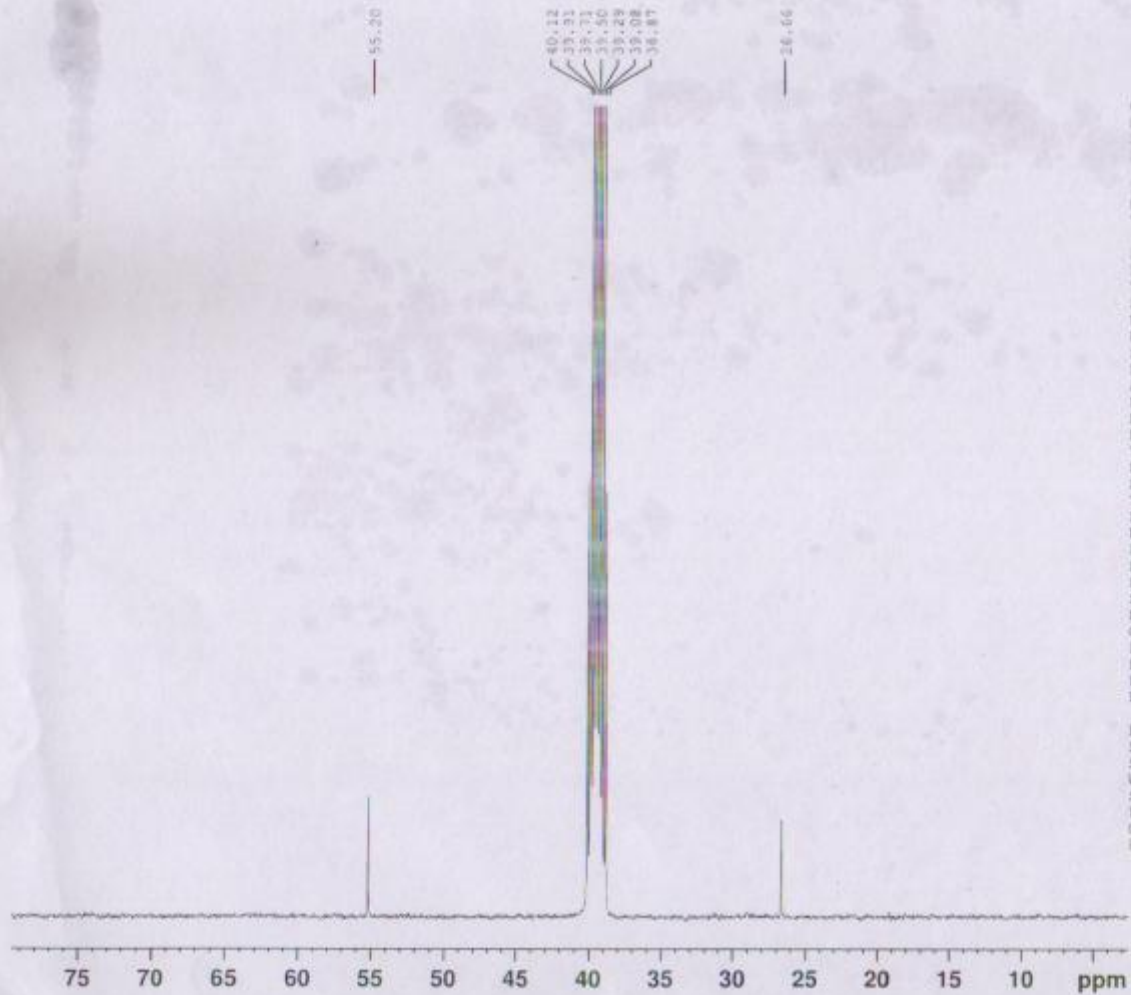

Current Data Parameters  
NAME 022211b1830-C6292-062  
EXPRD 2  
PROCNO 1

F2 - Acquisition Parameters

Date\_ 20221115  
Time 6.10 h  
INSTRM Avance  
PROBHD 1143739\_0419 1  
PULPROG zgpg30  
TD 65536  
SOLVENT DMSO  
NS 1000  
DS 4  
SWH 23809.523 Hz  
FIDRES 0.726609 Hz  
AQ 1.3762560 sec  
RG 101  
DM 21.000 usec  
DE 6.50 usec  
TE 299.2 K  
D1 2.0000000 sec  
D11 0.0300000 sec  
TDO 1  
SFO1 100.6706101 MHz  
NUC1 13C  
PD 2.67 usec  
P1 8.00 usec  
PLW1 99.05599876 W  
SFO2 400.3216013 MHz  
NUC2 1H  
CPDPRG12 waltz65  
PCPD2 90.00 usec  
PLW2 23.42200089 W  
PLW12 0.18505999 W  
PLW13 0.09308600 W

F2 - Processing parameters

SI 32768  
SF 100.6605945 MHz  
WDW EM  
SSM 0  
LB 2.00 Hz  
GB 0  
PC 1.40

# LCMS of 6-Bromo-4-(4-methoxyphenyl)-1-methyl-1,3-dihydro-2H-benzo[d]imidazol-2-one (8)

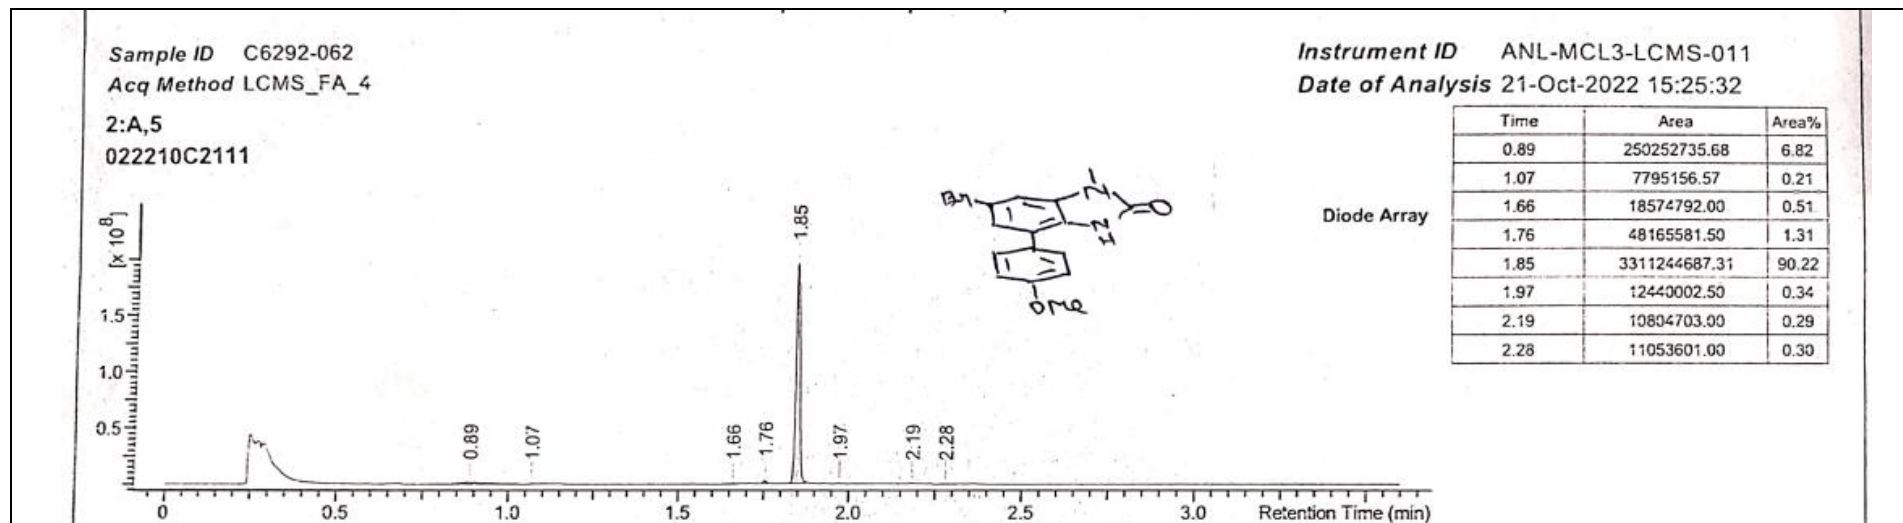

Acq Method LCMS\_FA\_4

2:A,5

022210C2111

Instrument ID ANL-MCL3-LCMS-011

Date of Analysis 21-Oct-2022 15:25:32

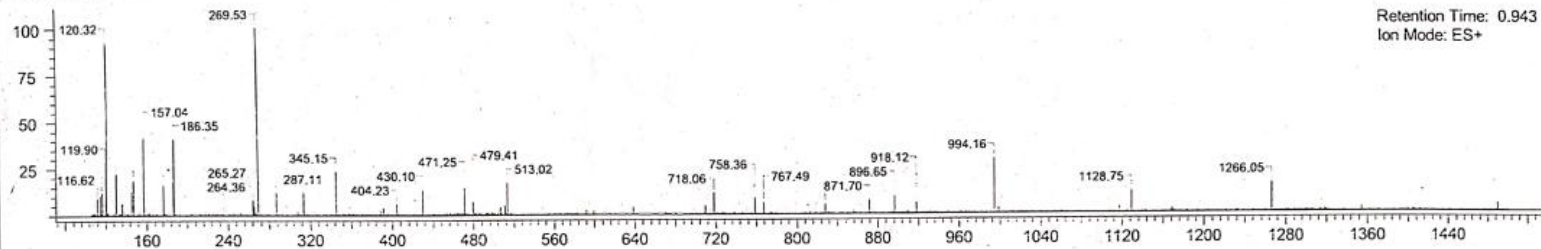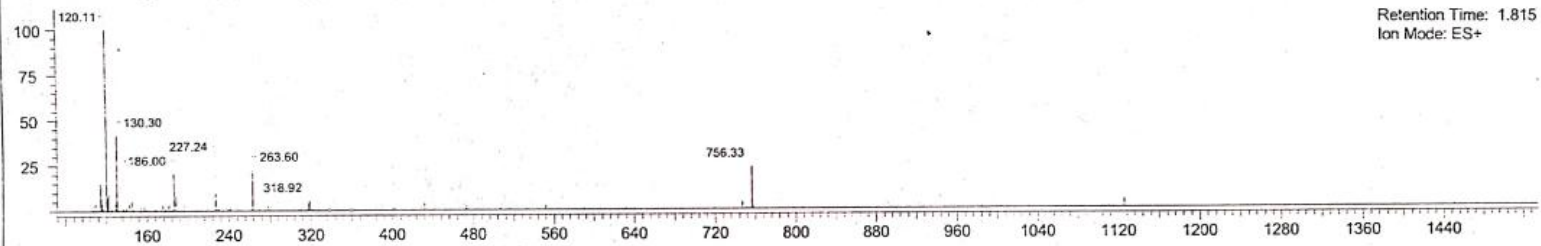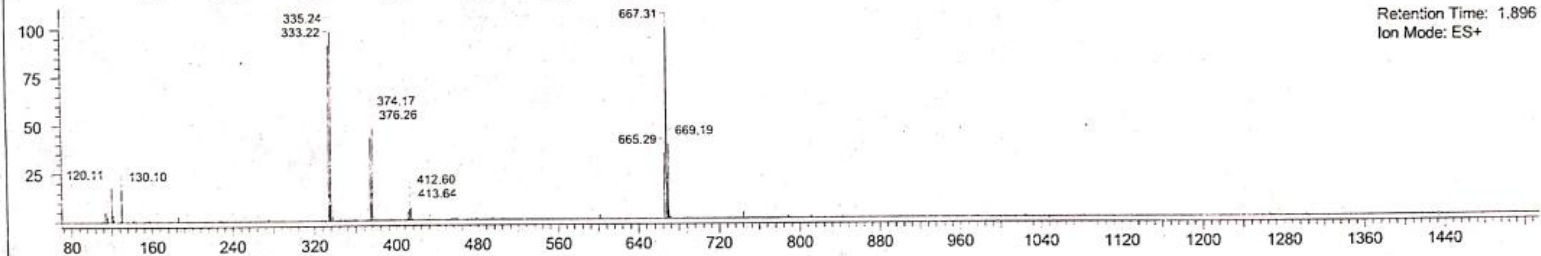



# <sup>1</sup>H NMR of benzo[d]thiazol-2(3H)-one (2v)

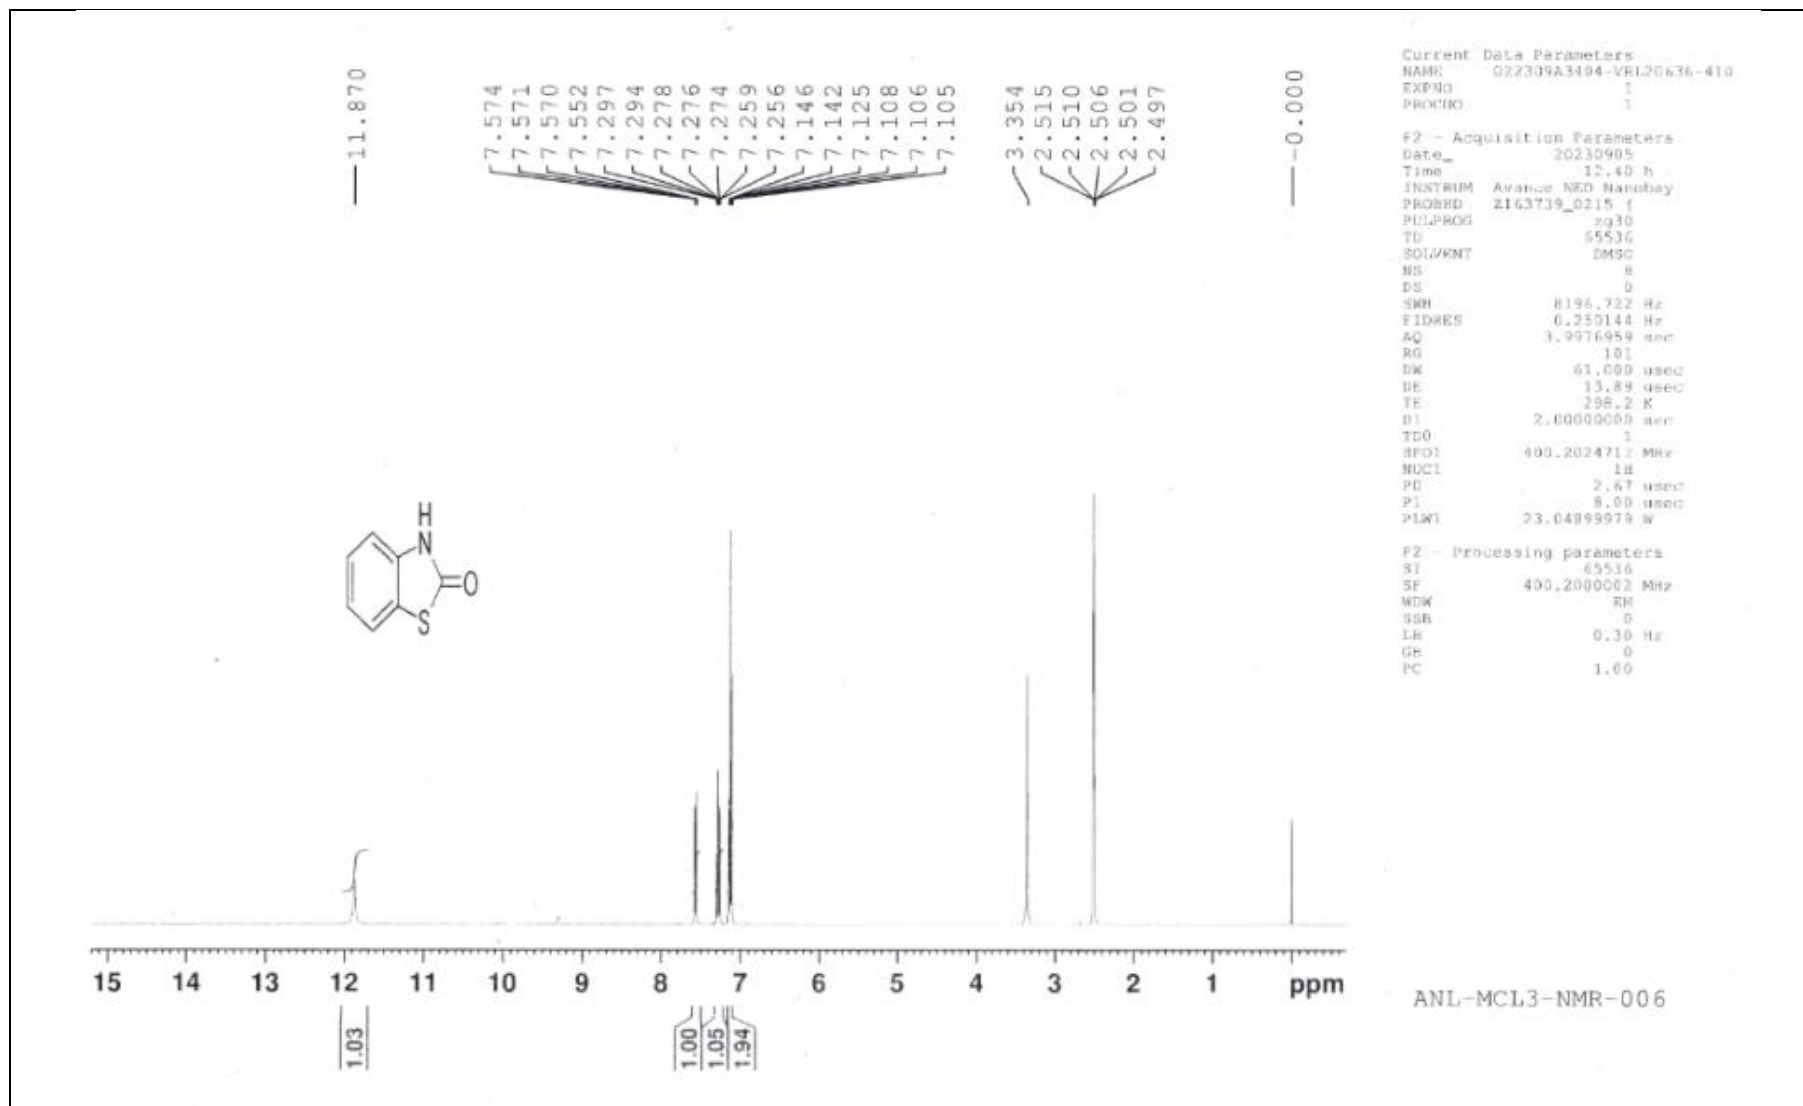

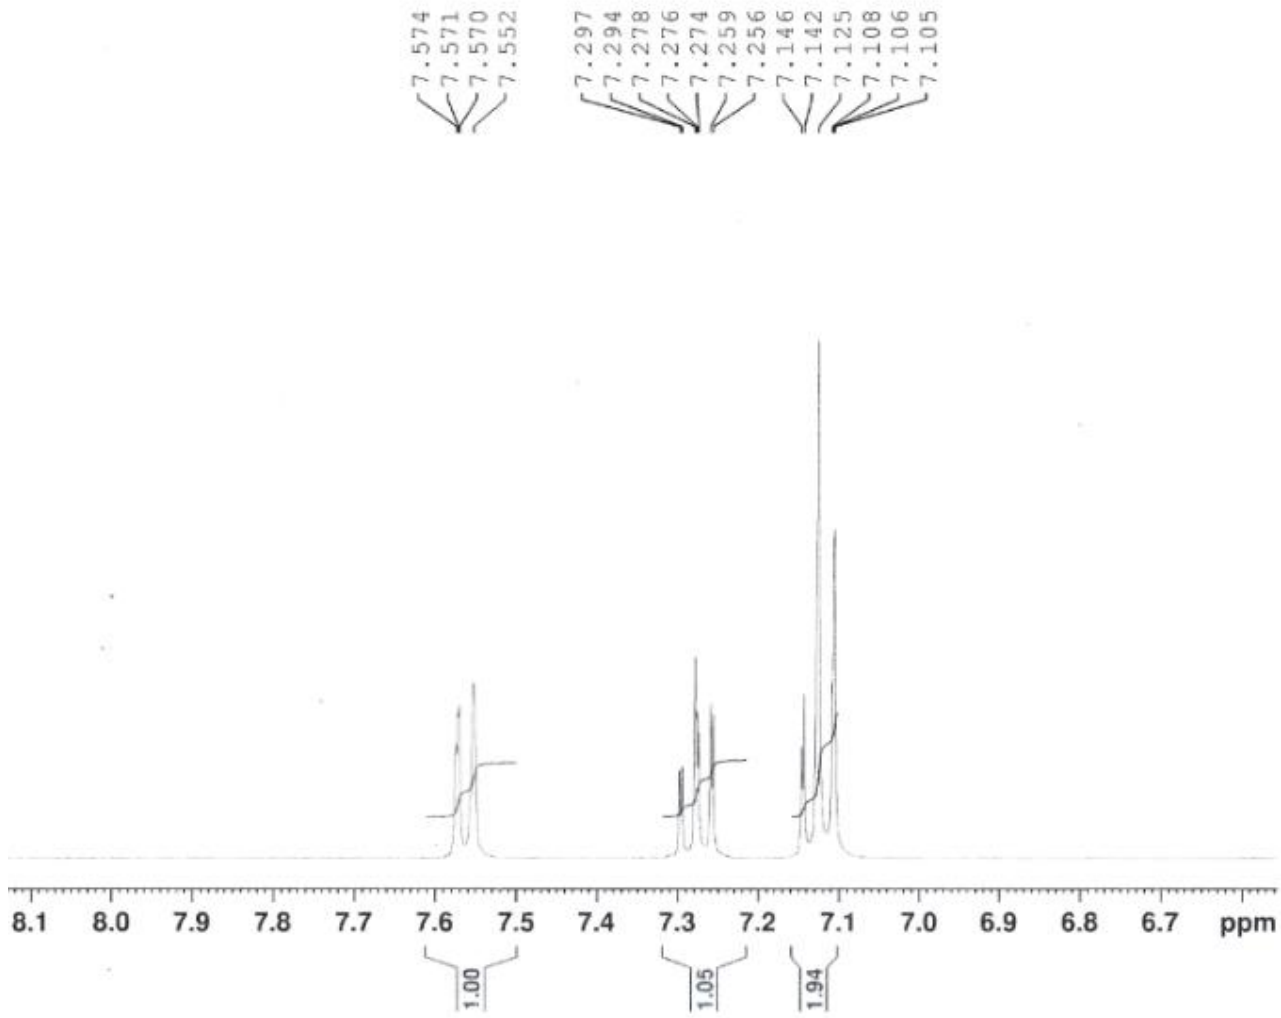

Current Data Parameters  
 NAME 022309A3404-VBL20636-410  
 EXPNO 1  
 PROCNO 1

F2 - Acquisition Parameters  
 Date\_ 20230905  
 Time 12.40 h  
 INSTRUM Avance NEO Nanobay  
 PROBHD Z163739\_0215 1  
 PULPROG zg30  
 TD 65536  
 SOLVENT DMSO  
 NS 8  
 DS 0  
 SWH 8196.722 Hz  
 FIDRES 0.250144 Hz  
 AQ 3.9976959 sec  
 RG 101  
 CM 61.000 usec  
 DE 13.89 usec  
 TE 298.2 K  
 DI 2.0000000 sec  
 TDD 1  
 SFO1 400.2024713 MHz  
 NUC1 1H  
 P0 2.67 usec  
 P1 8.00 usec  
 PLW1 25.04899979 W

F2 - Processing parameters  
 SI 65536  
 SF 400.2000002 MHz  
 WDW EM  
 SSB 0  
 LB 0.30 Hz  
 GB 0  
 PC 1.00

ANL-MCL3-NMR-006

# <sup>13</sup>C NMR of of benzo[d]thiazol-2(3H)-one (2v)

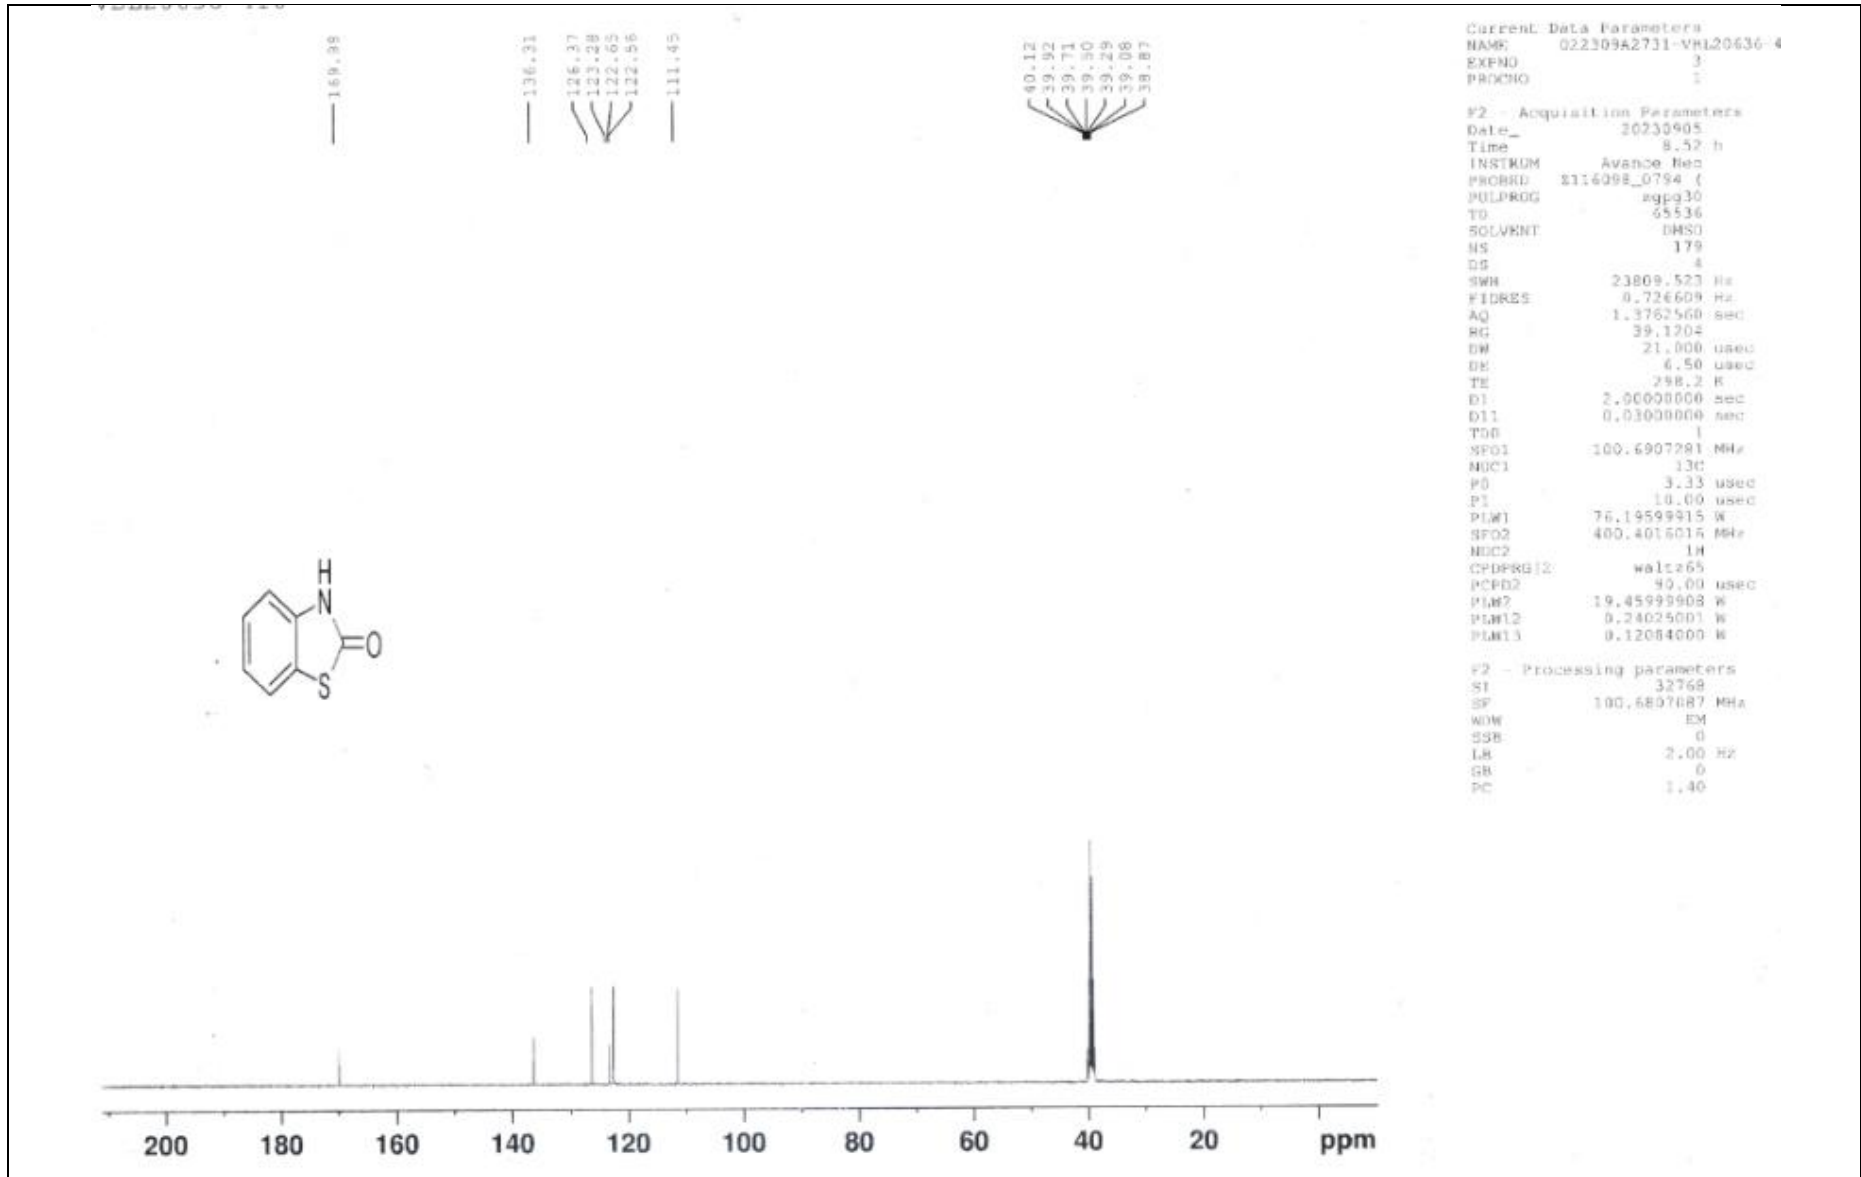

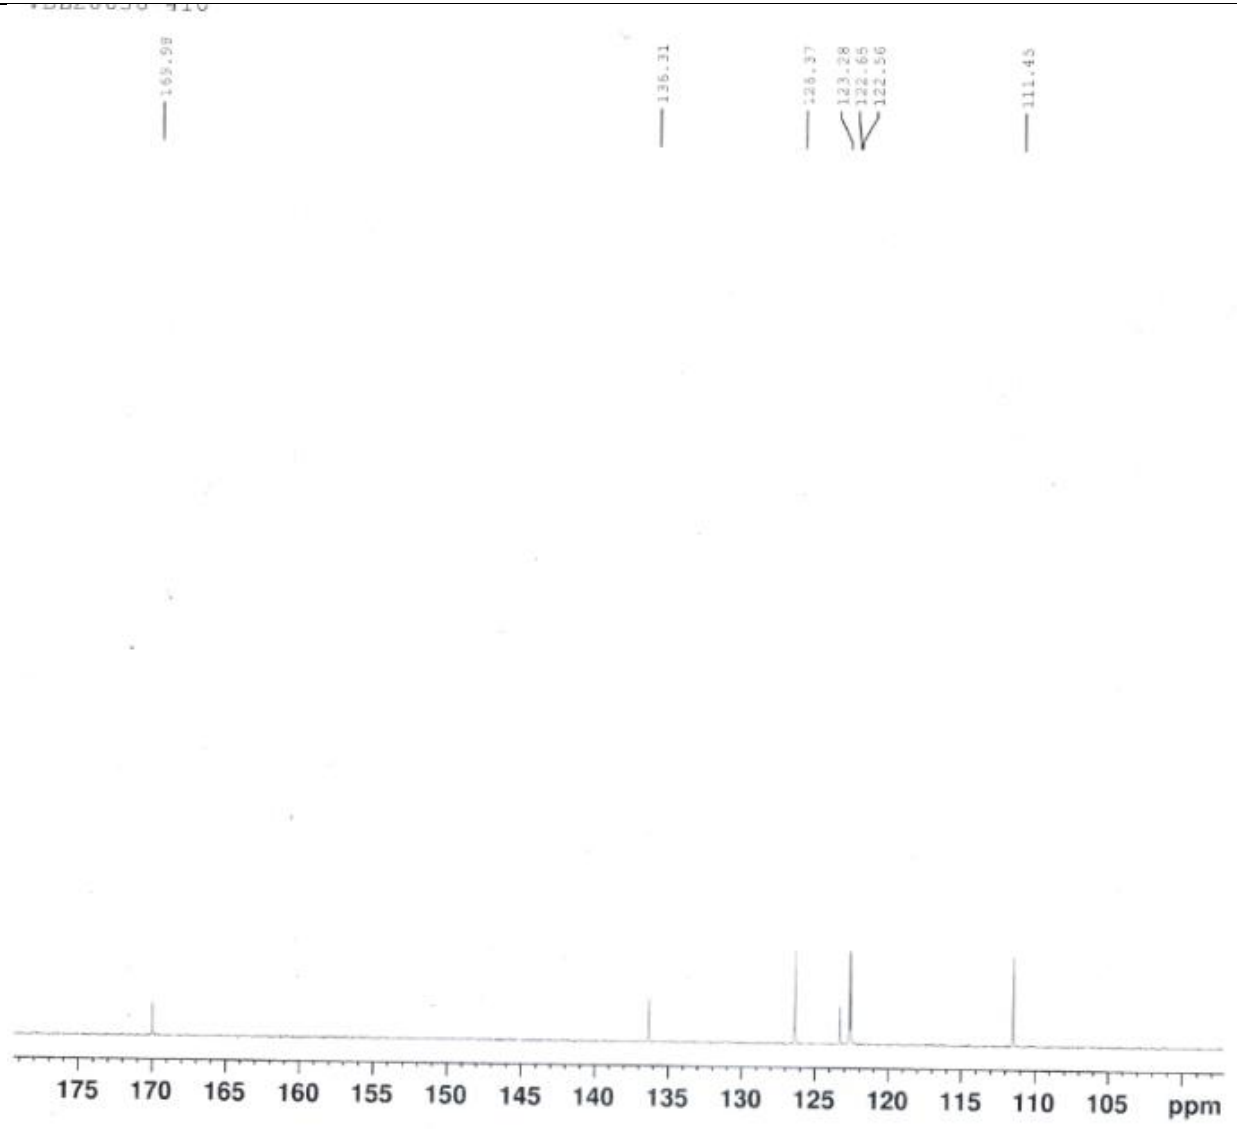

```

Current Data Parameters
NAME      022309A2731-VBL20636-41
EXPNO     3
PROCNO    1

F2 - Acquisition Parameters
Date_     20230905
Time      8.52 h
INSTRUM   Avance Neo
PROBHD    Z116098_0794 f
PULPROG   zgpg30
TD         65536
SOLVENT   DMSO
NS         179
DS         4
SWH        23809.523 Hz
FIDRES     0.726609 Hz
AQ         1.3762560 sec
RG         39.1204
DN         21.000 usec
DE         6.50 usec
TE         298.2 K
D1         2.0000000 sec
D11        0.03000000 sec
TDO        1
SFO1       100.6207281 MHz
NUC1       13C
P0         3.33 usec
P1         10.00 usec
PLW1       76.19599915 W
SFO2       400.4016016 MHz
NUC2       1H
CPDPRG2    waltz65
PCPD2      90.00 usec
PLW2       19.45999908 W
PLW12      0.24025001 W
PLW13      0.12084000 W

F2 - Processing parameters
SI         32768
SF         100.6207087 MHz
WDW        EM
SSR         0
LB         2.00 Hz
GB         0
PC         1.40
  
```

# LCMS of of of benzo[d]thiazol-2(3H)-one (2v)

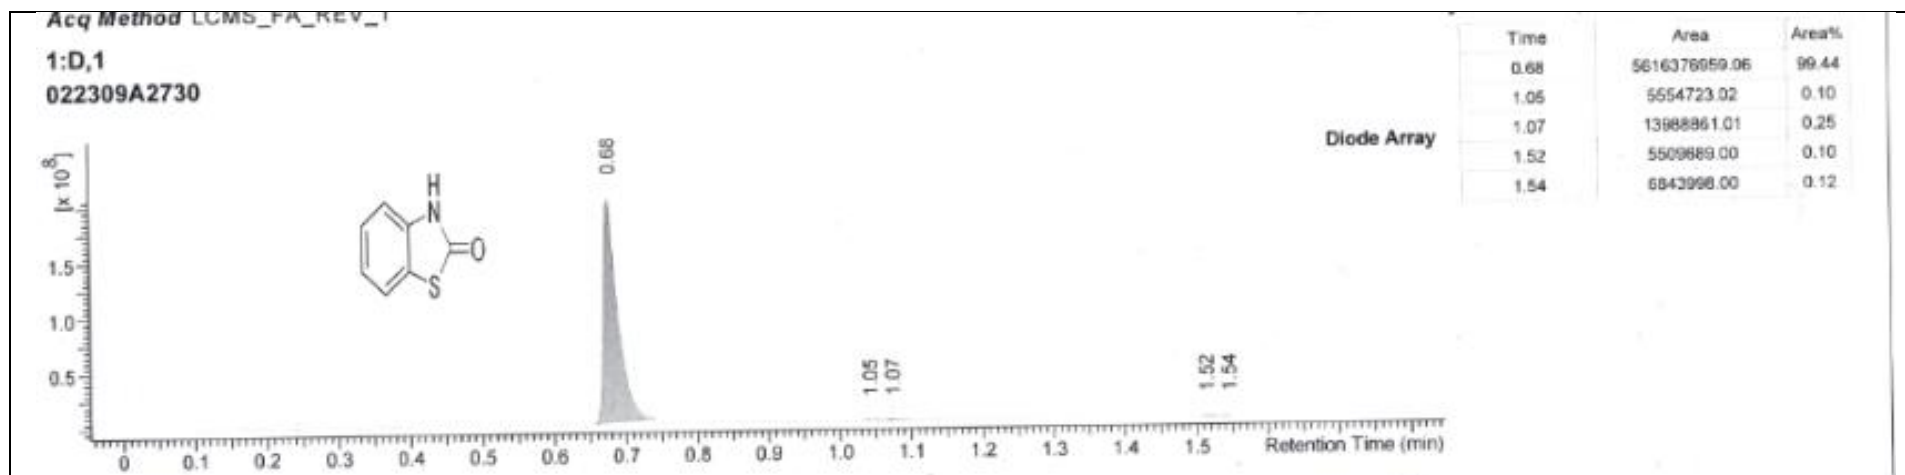

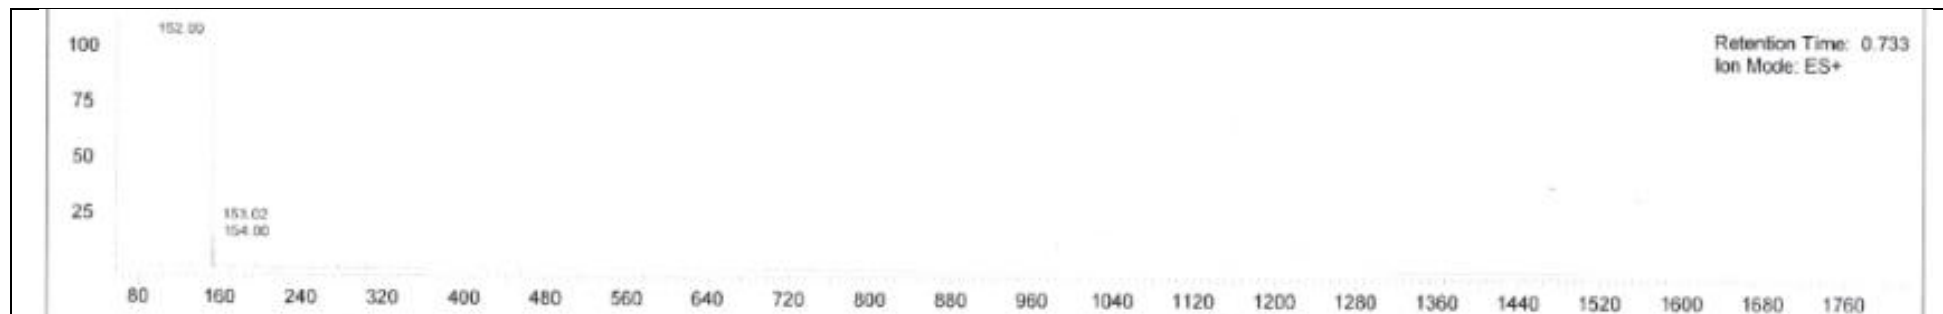

Supplement: d3ob01330h1.pdf [file d3ob01330h1.pdf]
